# Supplementary material
Source: MDPI journal article supplement (https://www.mdpi.com/2073-4352/5/3/275)
Supplement: s1 [file s1]

 # 1. SUBMISSION DETAILS

_publ_contact_author
;
                Nikolaus Korber
                Institut  f\"ur Anorganische Chemie
                Universit\"at Regensburg
                Universit\"atsstr.31
                93053 Regensburg
                Deutschland
;
_publ_contact_author_email
'nikolaus.korber@chemie.uni-regensburg.de'
_publ_contact_author_fax          '+49 941 9431812'
_publ_contact_author_phone        '+49 941 9434448'

_publ_requested_journal       'Crystals'
     

#========================================================================

# 3. TITLE AND AUTHOR LIST

_publ_section_title
;
 
;
loop_
_publ_author_name
_publ_author_address
    	  'Gaertner, Stefanie'
;         Insitut f\"ur Anorganische Chemie
          Universit\"at Regensburg
          Universit\"atsstr.31
          93053 Regensburg
          Deutschland   
;    
   	  'Hamberger, Markus'
;         Institut f\"ur Anorganische Chemie
          Universit\"at Regensburg
          Universit\"atsstr.31
          93053 Regensburg
          Deutschland
;  
	  'Korber, Nikolaus, Prof. Dr.'
;         Institut f\"ur Anorganische Chemie
          Universit\"at Regensburg
          Universit\"atsstr.31
          93053 Regensburg
          Deutschland
      
;

#========================================================================    
data_[K0.14Rb3.86Si9Ni(CO)2]2_16NH3
_audit_creation_date              2015-05-10
_audit_creation_method
;
Olex2 1.2-alpha
(compiled 2015.01.26 svn.r3150 for OlexSys, GUI svn.r4998)
;
_publ_section_references
;
Dolomanov, O.V., Bourhis, L.J., Gildea, R.J, Howard, J.A.K. & Puschmann, H.
 (2009), J. Appl. Cryst. 42, 339-341.

Sheldrick, G.M. (2008). Acta Cryst. A64, 112-122.
Stoe & Cie (2002). <i>X-AREA</i>. Stoe & Cie, Darmstadt, Germany.

Palatinus, L. & Chapuis, G. (2007). <i>J. Appl. Cryst.</i> <b>40</b>, 786--790.
;
_chemical_name_systematic     ?
_chemical_formula_moiety          
'(K +), (Rb +), ([(Si9 Ni (CO)2)2] 8-), (H3 N)' 
_chemical_formula_sum             'C4 H48 K0.28 N16 Ni2 O4 Rb7.72 Si18'
_chemical_formula_weight          1678.63
_chemical_melting_point           ?
loop_
  _atom_type_symbol
  _atom_type_description
  _atom_type_scat_dispersion_real
  _atom_type_scat_dispersion_imag
  _atom_type_scat_source
 'C' 'C' 0.0033 0.0016 'International Tables Vol C Tables 4.2.6.8 and 6.1.1.4'
 'H' 'H' 0.0000 0.0000 'International Tables Vol C Tables 4.2.6.8 and 6.1.1.4'
 'K' 'K' 0.2009 0.2494 'International Tables Vol C Tables 4.2.6.8 and 6.1.1.4'
 'N' 'N' 0.0061 0.0033 'International Tables Vol C Tables 4.2.6.8 and 6.1.1.4'
 'Ni' 'Ni' 0.3393 1.1124 'International Tables Vol C Tables 4.2.6.8 and 6.1.1.4'
 'O' 'O' 0.0106 0.0060 'International Tables Vol C Tables 4.2.6.8 and 6.1.1.4'
 'Rb' 'Rb' -0.9393 2.9676
 'International Tables Vol C Tables 4.2.6.8 and 6.1.1.4'
 'Si' 'Si' 0.0817 0.0704 'International Tables Vol C Tables 4.2.6.8 and 6.1.1.4'

_shelx_space_group_comment
;
The symmetry employed for this shelxl refinement is uniquely defined
by the following loop, which should always be used as a source of
symmetry information in preference to the above space-group names.
They are only intended as comments.
;
_space_group_crystal_system       'monoclinic'
_space_group_IT_number            15
_space_group_name_H-M_alt         'C 1 2/c 1'
_space_group_name_Hall            '-C 2yc'
loop_
  _space_group_symop_operation_xyz
 'x, y, z'
 '-x, y, -z+1/2'
 'x+1/2, y+1/2, z'
 '-x+1/2, y+1/2, -z+1/2'
 '-x, -y, -z'
 'x, -y, z-1/2'
 '-x+1/2, -y+1/2, -z'
 'x+1/2, -y+1/2, z-1/2'

_cell_length_a                    30.669(6)
_cell_length_b                    9.919(2)
_cell_length_c                    19.894(4)
_cell_angle_alpha                 90
_cell_angle_beta                  110.18(3)
_cell_angle_gamma                 90
_cell_volume                      5680(2)
_cell_formula_units_Z             4
_cell_measurement_reflns_used     ?
_cell_measurement_temperature     123(2)
_cell_measurement_theta_max       ?
_cell_measurement_theta_min       ?
_exptl_absorpt_coefficient_mu     7.676
_exptl_absorpt_correction_T_max   0.4480
_exptl_absorpt_correction_T_min   0.3638
_exptl_absorpt_correction_type    analytical
_exptl_absorpt_process_details   
'analytical from crystal shape (Stoe & Cie, 2002)'
_exptl_crystal_colour             red
_exptl_crystal_density_diffrn     1.963
_exptl_crystal_density_meas       ?
_exptl_crystal_density_method     'not measured'
_exptl_crystal_description        block
_exptl_crystal_F_000              3260
_exptl_crystal_size_max           0.18
_exptl_crystal_size_mid           0.12
_exptl_crystal_size_min           0.1
_exptl_crystal_preparation
'Crystal mounting in liquid nitrogen cooled perflourether oil.'
_exptl_special_details
;
Data were collected applying an imaging plate system (STOE) with the
following  measurement parameters:

         Detector distance (mm)                                  60
         Phi movement mode                              Oscillation
         Phi incr. (degrees)                                    0.7
         Number of exposures                                    514
         Irradiation / exposure (min)                          16.00

For a detailed description of the method see: Sheldrick, G.M., Paulus, E.
Vertesy, L. & Hahn, F. (1995) Acta Cryst. B51, 89-98. 
;
_diffrn_reflns_av_R_equivalents   0.0729
_diffrn_reflns_av_unetI/netI      0.0523
_diffrn_reflns_Laue_measured_fraction_full 0.999
_diffrn_reflns_Laue_measured_fraction_max 0.990
_diffrn_reflns_limit_h_max        39
_diffrn_reflns_limit_h_min        -39
_diffrn_reflns_limit_k_max        12
_diffrn_reflns_limit_k_min        -12
_diffrn_reflns_limit_l_max        25
_diffrn_reflns_limit_l_min        -25
_diffrn_reflns_number             46537
_diffrn_reflns_point_group_measured_fraction_full 0.999
_diffrn_reflns_point_group_measured_fraction_max 0.990
_diffrn_reflns_theta_full         25.242
_diffrn_reflns_theta_max          27.640
_diffrn_reflns_theta_min          2.318
_diffrn_ambient_temperature       123(2)
_diffrn_detector_area_resol_mean  ?
_diffrn_measured_fraction_theta_full 0.999
_diffrn_measured_fraction_theta_max 0.990
_diffrn_measurement_device_type   'Stoe IPDS'
_diffrn_measurement_method        .
_diffrn_radiation_type            MoK\a
_diffrn_radiation_wavelength      0.71073
_diffrn_source                    'fine-focus sealed tube'
_reflns_Friedel_coverage          0.000
_reflns_Friedel_fraction_full     .
_reflns_Friedel_fraction_max      .
_reflns_number_gt                 4898
_reflns_number_total              6534
_reflns_special_details
;
 Reflections were merged by SHELXL according to the crystal
 class for the calculation of statistics and refinement.
 
 _reflns_Friedel_fraction is defined as the number of unique
 Friedel pairs measured divided by the number that would be
 possible theoretically, ignoring centric projections and
 systematic absences.
;
_reflns_threshold_expression      'I > 2\s(I)'
_computing_cell_refinement        'Stoe & Cie, 2002'
_computing_data_collection        'Stoe & Cie, 2002'
_computing_data_reduction         'Stoe & Cie, 2002'
_computing_molecular_graphics     'Brandenburg, 2012'
_computing_publication_material   'Olex2 (Dolomanov et al., 2009)'
_computing_structure_refinement   'ShelXL (Sheldrick, 2008)'
_computing_structure_solution     'Palatinus & Chapuis (2007)'
_refine_diff_density_max          0.902
_refine_diff_density_min          -0.464
_refine_diff_density_rms          0.159
_refine_ls_extinction_coef        .
_refine_ls_extinction_method      none
_refine_ls_goodness_of_fit_ref    0.954
_refine_ls_hydrogen_treatment     constr
_refine_ls_matrix_type            full
_refine_ls_number_parameters      253
_refine_ls_number_reflns          6534
_refine_ls_number_restraints      6
_refine_ls_R_factor_all           0.0568
_refine_ls_R_factor_gt            0.0349
_refine_ls_restrained_S_all       0.953
_refine_ls_shift/su_max           0.001
_refine_ls_shift/su_mean          0.000
_refine_ls_structure_factor_coef  Fsqd
_refine_ls_weighting_details
'w=1/[\s^2^(Fo^2^)+(0.0323P)^2^] where P=(Fo^2^+2Fc^2^)/3'
_refine_ls_weighting_scheme       calc
_refine_ls_wR_factor_gt           0.0667
_refine_ls_wR_factor_ref          0.0711
_refine_special_details           ?
_olex2_refinement_description
;
1. Fixed Uiso
 At 1.2 times of:
  All N(H,H,H) groups
2. Uiso/Uaniso restraints and constraints
Rb4 \\sim K4A: within 2A with sigma of 0.001 and sigma for terminal atoms of
0.001
3. Others
 Sof(K4A)=0.5*(1-FVAR(2))
 Sof(Rb4)=0.5*FVAR(2)
 Fixed Sof: Rb5(0.5)
 Fixed X: H2A(0.399281) H2B(0.392509) H2C(0.36713) H3A(0.426089) H3B(0.404579)
 H3C(0.4287) H8A(0.4257) H8B(0.37732) H8C(0.38905) H4A(0.57688) H4B(0.58014)
 H4C(0.54873) H1A(0.286029) H1B(0.28634) H1C(0.32659)
 Fixed Y: H2A(0.47518) H2B(0.36413) H2C(0.489419) H3A(0.70195) H3B(0.770469)
 H3C(0.84789) H8A(0.48796) H8B(0.447009) H8C(0.58791) H4A(1.107121)
 H4B(1.10977) H4C(1.20127) H1A(0.446949) H1B(0.397341) H1C(0.376749)
 Fixed Z: H2A(0.199281) H2B(0.14903) H2C(0.126301) H3A(0.24897) H3B(0.18095)
 H3C(0.245049) H8A(0.34777) H8B(0.326361) H8C(0.321941) H4A(0.245709)
 H4B(0.320331) H4C(0.26912) H1A(0.54752) H1B(0.47894) H1C(0.543241)
4.a Idealised Me refined as rotating group:
 N5(H5A,H5B,H5C), N7(H7A,H7B,H7C), N6(H6A,H6B,H6C)
;
_atom_sites_solution_hydrogens    constr
_atom_sites_solution_primary      direct
_atom_sites_solution_secondary    difmap
loop_
  _atom_site_label
  _atom_site_type_symbol
  _atom_site_fract_x
  _atom_site_fract_y
  _atom_site_fract_z
  _atom_site_U_iso_or_equiv
  _atom_site_adp_type
  _atom_site_occupancy
  _atom_site_site_symmetry_order
  _atom_site_calc_flag
  _atom_site_refinement_flags_posn
  _atom_site_refinement_flags_adp
  _atom_site_refinement_flags_occupancy
  _atom_site_disorder_assembly
  _atom_site_disorder_group
 Rb1 Rb 0.40605(2) 0.50100(5) 0.50623(2) 0.02388(9) Uani 1 1 d . . . A 1
 Rb2 Rb 0.50762(2) 0.95337(5) 0.35324(2) 0.02220(9) Uani 1 1 d . . . . .
 Rb3 Rb 0.31699(2) 0.95202(5) 0.14684(2) 0.03013(10) Uani 1 1 d . . . . .
 Rb5 Rb 0.25656(9) 0.7314(3) 0.4995(2) 0.0431(5) Uani 0.5 1 d . . . A 1
 Ni1 Ni 0.49907(2) 0.74916(5) 0.51943(2) 0.01529(10) Uani 1 1 d . . . . .
 Si2 Si 0.35657(4) 1.18408(12) 0.39599(6) 0.0189(2) Uani 1 1 d . . . . .
 Si5 Si 0.31242(3) 1.02390(12) 0.45395(5) 0.0186(2) Uani 1 1 d . . . . .
 Si4 Si 0.35471(4) 0.80615(12) 0.41073(6) 0.0196(2) Uani 1 1 d . . . . .
 Si1 Si 0.31294(4) 0.98865(13) 0.33275(5) 0.0210(2) Uani 1 1 d . . . . .
 Si7 Si 0.43324(3) 0.88095(12) 0.47919(5) 0.0159(2) Uani 1 1 d . . . . .
 Si6 Si 0.43587(3) 1.11807(12) 0.45942(5) 0.0160(2) Uani 1 1 d . . . . .
 Si8 Si 0.37356(4) 0.88649(13) 0.53387(6) 0.0200(2) Uani 1 1 d . . . . .
 Si3 Si 0.39554(4) 0.97258(12) 0.35677(5) 0.0188(2) Uani 1 1 d . . . . .
 Si9 Si 0.38190(4) 1.13512(13) 0.52529(5) 0.0197(2) Uani 1 1 d . . . . .
 N5 N 0.30183(15) 0.6853(5) 0.1988(2) 0.0383(10) Uani 1 1 d . . . . .
 H5A H 0.2729 0.6582 0.1749 0.046 Uiso 1 1 calc GR . . . .
 H5B H 0.3061 0.6901 0.2453 0.046 Uiso 1 1 calc GR . . . .
 H5C H 0.3219 0.6266 0.1919 0.046 Uiso 1 1 calc GR . . . .
 N2 N 0.39389(14) 0.4535(4) 0.1537(2) 0.0322(8) Uani 1 1 d . . . . .
 H2A H 0.3993 0.4752 0.1993 0.039 Uiso 1 1 d R . . . .
 H2B H 0.3925 0.3641 0.1490 0.039 Uiso 1 1 d R . . . .
 H2C H 0.3671 0.4894 0.1263 0.039 Uiso 1 1 d R . . . .
 O2 O 0.50136(12) 0.6749(4) 0.66170(16) 0.0323(7) Uani 1 1 d . . . . .
 N3 N 0.42858(13) 0.7712(4) 0.22181(19) 0.0287(8) Uani 1 1 d . . . . .
 H3A H 0.4261 0.7020 0.2490 0.034 Uiso 1 1 d R . . . .
 H3B H 0.4046 0.7705 0.1810 0.034 Uiso 1 1 d R . . . .
 H3C H 0.4287 0.8479 0.2450 0.034 Uiso 1 1 d R . . . .
 N8 N 0.39721(15) 0.5035(5) 0.3171(2) 0.0347(9) Uani 1 1 d . . . . .
 H8A H 0.4257 0.4880 0.3478 0.042 Uiso 1 1 d R . . . .
 H8B H 0.3773 0.4470 0.3264 0.042 Uiso 1 1 d R . . . .
 H8C H 0.3890 0.5879 0.3219 0.042 Uiso 1 1 d R . . . .
 O1 O 0.49943(12) 0.6337(4) 0.38591(16) 0.0305(7) Uani 1 1 d . . . . .
 N7 N 0.20683(16) 0.7607(5) 0.3280(2) 0.0393(10) Uani 1 1 d . . . . .
 H7A H 0.2367 0.7770 0.3523 0.047 Uiso 1 1 calc GR . . A 2
 H7B H 0.1893 0.8158 0.3432 0.047 Uiso 1 1 calc GR . . A 2
 H7C H 0.2011 0.7746 0.2816 0.047 Uiso 1 1 calc GR . . A 2
 N6 N 0.22062(13) 0.9887(4) 0.1500(2) 0.0297(8) Uani 1 1 d . . . . .
 H6A H 0.2079 1.0618 0.1250 0.036 Uiso 1 1 calc GR . . . .
 H6B H 0.2219 0.9985 0.1951 0.036 Uiso 1 1 calc GR . . . .
 H6C H 0.2035 0.9167 0.1308 0.036 Uiso 1 1 calc GR . . . .
 N4 N 0.56111(13) 1.1190(4) 0.27534(18) 0.0265(8) Uani 1 1 d . . . . .
 H4A H 0.5769 1.1071 0.2457 0.032 Uiso 1 1 d R . . . .
 H4B H 0.5801 1.1098 0.3203 0.032 Uiso 1 1 d R . . . .
 H4C H 0.5487 1.2013 0.2691 0.032 Uiso 1 1 d R . . . .
 N1 N 0.30364(14) 0.4328(5) 0.5208(2) 0.0349(9) Uani 1 1 d . . . . .
 H1A H 0.2860 0.4469 0.5475 0.042 Uiso 1 1 d R . . . .
 H1B H 0.2863 0.3973 0.4789 0.042 Uiso 1 1 d R . . . .
 H1C H 0.3266 0.3767 0.5432 0.042 Uiso 1 1 d R . . . .
 C1 C 0.49840(14) 0.6697(4) 0.4412(2) 0.0214(8) Uani 1 1 d . . . . .
 C2 C 0.50040(13) 0.6984(4) 0.6041(2) 0.0194(8) Uani 1 1 d . . . . .
 Rb4 Rb 0.5000 0.55084(16) 0.2500 0.0225(5) Uani 0.725(7) 2 d S TU P A 2
 K4A K 0.5115(8) 0.5520(13) 0.2485(16) 0.0229(9) Uani 0.137(4) 1 d . U . A 3

loop_
  _atom_site_aniso_label
  _atom_site_aniso_U_11
  _atom_site_aniso_U_22
  _atom_site_aniso_U_33
  _atom_site_aniso_U_23
  _atom_site_aniso_U_13
  _atom_site_aniso_U_12
 Rb1 0.02476(18) 0.0203(2) 0.02525(18) 0.00247(15) 0.00697(14) -0.00085(16)
 Rb2 0.01883(17) 0.0274(2) 0.02001(17) 0.00225(15) 0.00620(13) 0.00158(16)
 Rb3 0.0314(2) 0.0334(3) 0.0311(2) 0.00630(18) 0.01775(17) 0.00461(19)
 Rb5 0.0348(14) 0.0397(17) 0.0496(5) 0.0076(10) 0.0077(10) -0.0180(9)
 Ni1 0.0138(2) 0.0136(2) 0.0186(2) 0.00102(18) 0.00563(17) -0.00015(19)
 Si2 0.0175(5) 0.0163(6) 0.0218(5) 0.0035(4) 0.0056(4) 0.0015(4)
 Si5 0.0142(4) 0.0214(7) 0.0208(5) 0.0011(4) 0.0068(4) 0.0003(4)
 Si4 0.0182(5) 0.0152(6) 0.0236(5) -0.0013(4) 0.0048(4) -0.0019(4)
 Si1 0.0170(5) 0.0256(7) 0.0176(5) 0.0002(4) 0.0025(4) 0.0006(4)
 Si7 0.0148(5) 0.0149(6) 0.0183(5) 0.0006(4) 0.0059(4) 0.0005(4)
 Si6 0.0139(4) 0.0150(6) 0.0195(5) 0.0005(4) 0.0063(4) -0.0003(4)
 Si8 0.0214(5) 0.0214(6) 0.0195(5) 0.0048(4) 0.0101(4) 0.0035(4)
 Si3 0.0185(5) 0.0227(7) 0.0164(4) -0.0008(4) 0.0078(4) 0.0002(4)
 Si9 0.0192(5) 0.0223(6) 0.0191(5) -0.0042(4) 0.0084(4) -0.0036(4)
 N5 0.037(2) 0.038(3) 0.041(2) -0.0030(19) 0.0134(18) -0.0097(19)
 N2 0.038(2) 0.028(2) 0.0329(19) 0.0031(17) 0.0153(16) 0.0029(18)
 O2 0.0445(19) 0.029(2) 0.0248(15) 0.0021(13) 0.0135(13) -0.0023(15)
 N3 0.031(2) 0.027(2) 0.0273(17) -0.0026(15) 0.0092(15) -0.0003(16)
 N8 0.038(2) 0.037(2) 0.0301(19) 0.0037(17) 0.0132(16) -0.0003(19)
 O1 0.0399(18) 0.0272(19) 0.0284(15) -0.0050(13) 0.0167(14) -0.0012(14)
 N7 0.040(2) 0.036(3) 0.044(2) 0.002(2) 0.0186(19) 0.003(2)
 N6 0.0253(17) 0.030(2) 0.0300(18) -0.0026(16) 0.0048(14) 0.0004(16)
 N4 0.0281(18) 0.028(2) 0.0219(16) -0.0012(15) 0.0068(14) 0.0021(16)
 N1 0.0277(19) 0.039(3) 0.039(2) -0.0052(18) 0.0126(16) 0.0007(18)
 C1 0.0209(19) 0.015(2) 0.028(2) 0.0022(16) 0.0084(15) -0.0007(16)
 C2 0.0171(17) 0.014(2) 0.0255(19) -0.0014(15) 0.0057(15) -0.0012(15)
 Rb4 0.0318(14) 0.0192(4) 0.0205(4) 0.000 0.0142(11) 0.000
 K4A 0.0318(19) 0.0196(10) 0.0211(10) 0.0006(10) 0.0142(16) 0.0001(10)

_geom_special_details
;
 All esds (except the esd in the dihedral angle between two l.s. planes)
 are estimated using the full covariance matrix.  The cell esds are taken
 into account individually in the estimation of esds in distances, angles
 and torsion angles; correlations between esds in cell parameters are only
 used when they are defined by crystal symmetry.  An approximate (isotropic)
 treatment of cell esds is used for estimating esds involving l.s. planes.
;
loop_
  _geom_bond_atom_site_label_1
  _geom_bond_atom_site_label_2
  _geom_bond_distance
  _geom_bond_site_symmetry_2
  _geom_bond_publ_flag
 Rb1 Ni1 3.7079(9) . ?
 Rb1 Ni1 3.9887(9) 5_666 ?
 Rb1 Si2 3.8338(14) 1_545 ?
 Rb1 Si4 3.6312(14) . ?
 Rb1 Si7 3.9366(14) . ?
 Rb1 Si8 4.0366(15) . ?
 Rb1 Si9 3.7494(15) 1_545 ?
 Rb1 N2 3.116(4) 6_566 ?
 Rb1 O2 3.853(4) . ?
 Rb1 O1 3.241(4) 5_666 ?
 Rb1 N1 3.322(4) . ?
 Rb1 C1 3.230(4) 5_666 ?
 Rb2 Si7 3.5962(15) 5_676 ?
 Rb2 Si6 3.5971(15) 5_676 ?
 Rb2 Si3 3.4674(13) . ?
 Rb2 Si9 3.5273(17) 5_676 ?
 Rb2 O2 3.702(4) 5_676 ?
 Rb2 N3 3.406(4) . ?
 Rb2 N3 3.367(4) 2_655 ?
 Rb2 O1 3.263(4) . ?
 Rb2 N4 3.090(4) . ?
 Rb2 N4 3.157(4) 2_655 ?
 Rb2 C1 3.376(4) . ?
 Rb2 C2 3.585(4) 5_676 ?
 Rb3 Rb5 4.088(4) 4 ?
 Rb3 Si5 3.7988(13) 6_575 ?
 Rb3 Si1 3.7609(13) . ?
 Rb3 Si8 3.6490(13) 6_575 ?
 Rb3 Si3 4.0429(18) . ?
 Rb3 Si9 3.7251(14) 6_575 ?
 Rb3 N5 2.935(5) . ?
 Rb3 N3 3.692(4) . ?
 Rb3 N7 3.227(5) 4 ?
 Rb3 N6 3.000(4) . ?
 Rb3 N4 3.889(4) 2_655 ?
 Rb3 N1 4.041(4) 4 ?
 Rb5 Rb3 4.088(4) 4_545 ?
 Rb5 Rb5 0.551(3) 7_566 ?
 Rb5 Si5 3.639(4) . ?
 Rb5 Si5 3.619(4) 7_566 ?
 Rb5 Si4 4.049(3) . ?
 Rb5 Si8 3.988(3) 7_566 ?
 Rb5 Si8 3.744(4) . ?
 Rb5 N7 3.222(6) 7_566 ?
 Rb5 N7 3.234(6) . ?
 Rb5 N6 4.070(5) 4_545 ?
 Rb5 N1 3.258(5) . ?
 Rb5 N1 3.762(5) 7_566 ?
 Ni1 Rb1 3.9887(9) 5_666 ?
 Ni1 Rb2 3.9399(9) 5_676 ?
 Ni1 Si7 2.3045(12) . ?
 Ni1 Si6 2.3052(12) 5_676 ?
 Ni1 C1 1.738(4) . ?
 Ni1 C2 1.746(4) . ?
 Ni1 Rb4 5.4595(13) 5_666 ?
 Si2 Rb1 3.8339(14) 1_565 ?
 Si2 Rb2 5.455(2) 5_676 ?
 Si2 Si5 2.6007(16) . ?
 Si2 Si1 2.4432(17) . ?
 Si2 Si6 2.4122(16) . ?
 Si2 Si3 2.6612(17) . ?
 Si2 Si9 2.4652(16) . ?
 Si5 Rb1 5.4464(15) 1_565 ?
 Si5 Rb2 5.534(2) 5_676 ?
 Si5 Rb3 3.7989(13) 6_576 ?
 Si5 Rb5 3.619(4) 7_566 ?
 Si5 Si4 2.8029(17) . ?
 Si5 Si1 2.4417(15) . ?
 Si5 Si8 2.4176(17) . ?
 Si5 Si9 2.3845(17) . ?
 Si4 Rb5 4.379(3) 7_566 ?
 Si4 Si1 2.4400(17) . ?
 Si4 Si7 2.4376(17) . ?
 Si4 Si8 2.4482(16) . ?
 Si4 Si3 2.5246(16) . ?
 Si1 Rb5 5.035(4) 7_566 ?
 Si1 Si3 2.4158(16) . ?
 Si7 Rb2 3.5961(15) 5_676 ?
 Si7 Si6 2.3906(16) . ?
 Si7 Si8 2.4312(15) . ?
 Si7 Si3 2.4802(16) . ?
 Si6 Rb1 4.0887(14) 1_565 ?
 Si6 Rb2 3.5971(15) 5_676 ?
 Si6 Ni1 2.3052(12) 5_676 ?
 Si6 Si3 2.4577(16) . ?
 Si6 Si9 2.4458(15) . ?
 Si8 Rb2 3.8988(17) 5_676 ?
 Si8 Rb3 3.6491(13) 6_576 ?
 Si8 Rb5 3.988(3) 7_566 ?
 Si8 Si9 2.4913(18) . ?
 Si3 Rb2 5.552(2) 5_676 ?
 Si9 Rb1 3.7493(15) 1_565 ?
 Si9 Rb2 3.5272(17) 5_676 ?
 Si9 Rb3 3.7254(14) 6_576 ?
 Si9 Rb5 5.482(4) 7_566 ?
 N2 Rb1 3.116(4) 6_565 ?
 N2 Rb5 4.648(5) 6_565 ?
 N2 Rb5 5.073(5) 4_545 ?
 N2 Rb4 3.300(4) . ?
 N2 K4A 3.04(3) 2_655 ?
 O2 Rb2 3.702(4) 5_676 ?
 O2 C2 1.159(5) . ?
 O2 Rb4 2.855(4) 5_666 ?
 O2 K4A 2.79(2) 6_566 ?
 O2 K4A 2.98(2) 5_666 ?
 N3 Rb1 4.911(4) 6_565 ?
 N3 Rb2 3.367(4) 2_655 ?
 N3 Rb4 3.007(4) . ?
 N3 K4A 3.246(19) . ?
 N3 K4A 2.776(17) 2_655 ?
 N8 Rb4 3.853(4) . ?
 O1 Rb1 3.241(4) 5_666 ?
 O1 C1 1.167(5) . ?
 O1 Rb4 2.832(3) . ?
 O1 K4A 2.70(3) 2_655 ?
 O1 K4A 2.99(3) . ?
 N7 Rb3 3.227(5) 4_545 ?
 N7 Rb5 3.222(6) 7_566 ?
 N6 Rb1 4.054(4) 4 ?
 N6 Rb5 4.490(5) 6_575 ?
 N6 Rb5 4.070(5) 4 ?
 N4 Rb2 3.157(4) 2_655 ?
 N4 Rb3 3.889(4) 2_655 ?
 N4 Rb4 4.632(4) 1_565 ?
 N1 Rb3 4.508(5) 6_566 ?
 N1 Rb3 4.041(4) 4_545 ?
 N1 Rb5 3.762(5) 7_566 ?
 C1 Rb1 3.230(4) 5_666 ?
 C1 Rb4 3.999(4) . ?
 C2 Rb1 4.616(4) 5_666 ?
 C2 Rb2 3.585(4) 5_676 ?
 C2 Rb4 3.815(4) 5_666 ?
 Rb4 N2 3.300(4) 2_655 ?
 Rb4 O2 2.855(4) 5_666 ?
 Rb4 O2 2.855(4) 6_565 ?
 Rb4 N3 3.007(4) 2_655 ?
 Rb4 N8 3.853(4) 2_655 ?
 Rb4 O1 2.832(3) 2_655 ?
 Rb4 C2 3.815(4) 6_565 ?
 Rb4 C2 3.815(4) 5_666 ?
 K4A Rb2 6.308(15) 1_545 ?
 K4A Rb2 4.412(17) 2_655 ?
 K4A Rb2 6.236(15) 2_645 ?
 K4A N2 3.04(3) 2_655 ?
 K4A O2 2.79(2) 6_565 ?
 K4A O2 2.98(2) 5_666 ?
 K4A N3 2.776(17) 2_655 ?
 K4A O1 2.70(3) 2_655 ?
 K4A K4A 0.73(4) 2_655 ?

loop_
  _geom_angle_atom_site_label_1
  _geom_angle_atom_site_label_2
  _geom_angle_atom_site_label_3
  _geom_angle
  _geom_angle_site_symmetry_1
  _geom_angle_site_symmetry_3
  _geom_angle_publ_flag
 Ni1 Rb1 Ni1 81.06(2) . 5_666 ?
 Ni1 Rb1 Si2 136.71(2) . 1_545 ?
 Ni1 Rb1 Si7 34.928(19) . . ?
 Ni1 Rb1 Si8 146.31(2) 5_666 . ?
 Ni1 Rb1 Si8 65.27(2) . . ?
 Ni1 Rb1 Si9 144.04(2) . 1_545 ?
 Ni1 Rb1 O2 45.09(5) . . ?
 Si2 Rb1 Ni1 65.11(3) 1_545 5_666 ?
 Si2 Rb1 Si7 140.13(3) 1_545 . ?
 Si2 Rb1 Si8 141.91(3) 1_545 . ?
 Si2 Rb1 O2 150.13(6) 1_545 . ?
 Si4 Rb1 Ni1 70.60(3) . . ?
 Si4 Rb1 Ni1 130.95(2) . 5_666 ?
 Si4 Rb1 Si2 111.69(3) . 1_545 ?
 Si4 Rb1 Si7 37.30(3) . . ?
 Si4 Rb1 Si8 36.76(3) . . ?
 Si4 Rb1 Si9 142.62(3) . 1_545 ?
 Si4 Rb1 O2 96.83(6) . . ?
 Si7 Rb1 Ni1 112.32(2) . 5_666 ?
 Si7 Rb1 Si8 35.48(2) . . ?
 Si9 Rb1 Ni1 65.74(2) 1_545 5_666 ?
 Si9 Rb1 Si2 37.92(2) 1_545 1_545 ?
 Si9 Rb1 Si7 177.49(2) 1_545 . ?
 Si9 Rb1 Si8 146.76(3) 1_545 . ?
 Si9 Rb1 O2 118.27(5) 1_545 . ?
 N2 Rb1 Ni1 100.15(8) 6_566 . ?
 N2 Rb1 Ni1 122.70(8) 6_566 5_666 ?
 N2 Rb1 Si2 120.34(8) 6_566 1_545 ?
 N2 Rb1 Si4 101.58(9) 6_566 . ?
 N2 Rb1 Si7 95.15(8) 6_566 . ?
 N2 Rb1 Si8 67.61(8) 6_566 . ?
 N2 Rb1 Si9 87.30(8) 6_566 1_545 ?
 N2 Rb1 O2 58.89(9) 6_566 . ?
 N2 Rb1 O1 78.84(10) 6_566 5_666 ?
 N2 Rb1 N1 61.54(11) 6_566 . ?
 N2 Rb1 C1 99.27(11) 6_566 5_666 ?
 O2 Rb1 Ni1 89.78(6) . 5_666 ?
 O2 Rb1 Si7 62.84(5) . . ?
 O2 Rb1 Si8 67.75(6) . . ?
 O1 Rb1 Ni1 74.71(6) 5_666 . ?
 O1 Rb1 Ni1 45.80(5) 5_666 5_666 ?
 O1 Rb1 Si2 97.34(7) 5_666 1_545 ?
 O1 Rb1 Si4 144.84(6) 5_666 . ?
 O1 Rb1 Si7 107.58(6) 5_666 . ?
 O1 Rb1 Si8 120.46(6) 5_666 . ?
 O1 Rb1 Si9 72.34(7) 5_666 1_545 ?
 O1 Rb1 O2 52.81(8) 5_666 . ?
 O1 Rb1 N1 121.00(10) 5_666 . ?
 N1 Rb1 Ni1 129.64(8) . 5_666 ?
 N1 Rb1 Ni1 148.92(8) . . ?
 N1 Rb1 Si2 71.53(8) . 1_545 ?
 N1 Rb1 Si4 87.87(8) . . ?
 N1 Rb1 Si7 117.26(8) . . ?
 N1 Rb1 Si8 84.01(8) . . ?
 N1 Rb1 Si9 64.43(8) . 1_545 ?
 N1 Rb1 O2 119.97(9) . . ?
 C1 Rb1 Ni1 74.65(8) 5_666 . ?
 C1 Rb1 Ni1 25.16(7) 5_666 5_666 ?
 C1 Rb1 Si2 83.76(8) 5_666 1_545 ?
 C1 Rb1 Si4 141.96(8) 5_666 . ?
 C1 Rb1 Si7 109.56(8) 5_666 . ?
 C1 Rb1 Si8 133.75(8) 5_666 . ?
 C1 Rb1 Si9 69.43(8) 5_666 1_545 ?
 C1 Rb1 O2 67.82(10) 5_666 . ?
 C1 Rb1 O1 20.79(9) 5_666 5_666 ?
 C1 Rb1 N1 130.13(11) 5_666 . ?
 Si7 Rb2 Si6 38.82(3) 5_676 5_676 ?
 Si7 Rb2 O2 67.60(5) 5_676 5_676 ?
 Si6 Rb2 O2 105.98(5) 5_676 5_676 ?
 Si3 Rb2 Si7 98.20(4) . 5_676 ?
 Si3 Rb2 Si6 96.70(4) . 5_676 ?
 Si3 Rb2 Si9 136.43(3) . 5_676 ?
 Si3 Rb2 O2 84.27(6) . 5_676 ?
 Si3 Rb2 C2 78.05(7) . 5_676 ?
 Si9 Rb2 Si7 54.59(3) 5_676 5_676 ?
 Si9 Rb2 Si6 40.14(3) 5_676 5_676 ?
 Si9 Rb2 O2 109.27(6) 5_676 5_676 ?
 Si9 Rb2 C2 101.87(7) 5_676 5_676 ?
 N3 Rb2 Si7 118.16(7) 2_655 5_676 ?
 N3 Rb2 Si7 162.12(7) . 5_676 ?
 N3 Rb2 Si6 130.67(7) . 5_676 ?
 N3 Rb2 Si6 101.99(7) 2_655 5_676 ?
 N3 Rb2 Si3 140.37(7) 2_655 . ?
 N3 Rb2 Si3 66.22(7) . . ?
 N3 Rb2 Si9 130.91(7) . 5_676 ?
 N3 Rb2 Si9 66.57(7) 2_655 5_676 ?
 N3 Rb2 O2 122.50(9) 2_655 5_676 ?
 N3 Rb2 O2 116.95(9) . 5_676 ?
 N3 Rb2 N3 75.14(12) 2_655 . ?
 N3 Rb2 C1 87.02(10) 2_655 . ?
 N3 Rb2 C2 127.14(9) . 5_676 ?
 N3 Rb2 C2 136.02(9) 2_655 5_676 ?
 O1 Rb2 Si7 107.95(6) . 5_676 ?
 O1 Rb2 Si6 69.21(6) . 5_676 ?
 O1 Rb2 Si3 84.52(6) . . ?
 O1 Rb2 Si9 75.14(6) . 5_676 ?
 O1 Rb2 O2 167.16(7) . 5_676 ?
 O1 Rb2 N3 70.33(9) . 2_655 ?
 O1 Rb2 N3 63.53(9) . . ?
 O1 Rb2 C1 20.16(9) . . ?
 O1 Rb2 C2 150.77(8) . 5_676 ?
 N4 Rb2 Si7 119.70(8) 2_655 5_676 ?
 N4 Rb2 Si7 92.10(7) . 5_676 ?
 N4 Rb2 Si6 152.93(7) 2_655 5_676 ?
 N4 Rb2 Si6 118.36(7) . 5_676 ?
 N4 Rb2 Si3 133.04(8) . . ?
 N4 Rb2 Si3 66.32(7) 2_655 . ?
 N4 Rb2 Si9 154.12(7) 2_655 5_676 ?
 N4 Rb2 Si9 85.71(7) . 5_676 ?
 N4 Rb2 O2 53.57(9) 2_655 5_676 ?
 N4 Rb2 O2 57.84(9) . 5_676 ?
 N4 Rb2 N3 104.92(9) . . ?
 N4 Rb2 N3 63.56(10) 2_655 . ?
 N4 Rb2 N3 64.70(10) . 2_655 ?
 N4 Rb2 N3 104.34(9) 2_655 2_655 ?
 N4 Rb2 O1 126.25(9) 2_655 . ?
 N4 Rb2 O1 135.00(9) . . ?
 N4 Rb2 N4 68.80(13) . 2_655 ?
 N4 Rb2 C1 134.57(10) 2_655 . ?
 N4 Rb2 C1 148.98(10) . . ?
 N4 Rb2 C2 66.98(10) 2_655 5_676 ?
 N4 Rb2 C2 72.41(10) . 5_676 ?
 C1 Rb2 Si7 90.34(7) . 5_676 ?
 C1 Rb2 Si6 52.80(7) . 5_676 ?
 C1 Rb2 Si3 76.97(7) . . ?
 C1 Rb2 Si9 70.73(7) . 5_676 ?
 C1 Rb2 O2 148.70(9) . 5_676 ?
 C1 Rb2 N3 77.95(10) . . ?
 C1 Rb2 C2 130.95(10) . 5_676 ?
 C2 Rb2 Si7 52.72(7) 5_676 5_676 ?
 C2 Rb2 Si6 89.58(7) 5_676 5_676 ?
 C2 Rb2 O2 18.21(8) 5_676 5_676 ?
 Si5 Rb3 Rb5 54.48(6) 6_575 4 ?
 Si5 Rb3 Si3 147.30(3) 6_575 . ?
 Si5 Rb3 N4 94.06(6) 6_575 2_655 ?
 Si5 Rb3 N1 57.67(6) 6_575 4 ?
 Si1 Rb3 Rb5 115.95(6) . 4 ?
 Si1 Rb3 Si5 170.10(3) . 6_575 ?
 Si1 Rb3 Si3 35.84(2) . . ?
 Si1 Rb3 N4 85.45(6) . 2_655 ?
 Si1 Rb3 N1 118.98(6) . 4 ?
 Si8 Rb3 Rb5 61.74(4) 6_575 4 ?
 Si8 Rb3 Si5 37.81(3) 6_575 6_575 ?
 Si8 Rb3 Si1 138.36(3) 6_575 . ?
 Si8 Rb3 Si3 111.94(3) 6_575 . ?
 Si8 Rb3 Si9 39.47(3) 6_575 6_575 ?
 Si8 Rb3 N3 83.73(7) 6_575 . ?
 Si8 Rb3 N4 57.47(6) 6_575 2_655 ?
 Si8 Rb3 N1 90.40(6) 6_575 4 ?
 Si3 Rb3 Rb5 133.41(5) . 4 ?
 Si9 Rb3 Rb5 88.98(5) 6_575 4 ?
 Si9 Rb3 Si5 36.93(3) 6_575 6_575 ?
 Si9 Rb3 Si1 150.13(3) 6_575 . ?
 Si9 Rb3 Si3 114.89(3) 6_575 . ?
 Si9 Rb3 N4 72.65(6) 6_575 2_655 ?
 Si9 Rb3 N1 89.75(6) 6_575 4 ?
 N5 Rb3 Rb5 138.26(9) . 4 ?
 N5 Rb3 Si5 117.20(9) . 6_575 ?
 N5 Rb3 Si1 71.21(9) . . ?
 N5 Rb3 Si8 141.19(9) . 6_575 ?
 N5 Rb3 Si3 78.00(9) . . ?
 N5 Rb3 Si9 101.80(9) . 6_575 ?
 N5 Rb3 N3 69.96(11) . . ?
 N5 Rb3 N7 136.79(12) . 4 ?
 N5 Rb3 N6 79.92(13) . . ?
 N5 Rb3 N4 119.41(11) . 2_655 ?
 N5 Rb3 N1 92.11(11) . 4 ?
 N3 Rb3 Rb5 145.47(7) . 4 ?
 N3 Rb3 Si5 98.32(6) . 6_575 ?
 N3 Rb3 Si1 89.43(6) . . ?
 N3 Rb3 Si3 57.87(6) . . ?
 N3 Rb3 Si9 61.39(6) . 6_575 ?
 N3 Rb3 N4 54.29(9) . 2_655 ?
 N3 Rb3 N1 140.14(9) . 4 ?
 N7 Rb3 Rb5 50.83(9) 4 4 ?
 N7 Rb3 Si5 99.53(8) 4 6_575 ?
 N7 Rb3 Si1 70.72(8) 4 . ?
 N7 Rb3 Si8 81.96(8) 4 6_575 ?
 N7 Rb3 Si3 83.00(8) 4 . ?
 N7 Rb3 Si9 121.41(8) 4 6_575 ?
 N7 Rb3 N3 128.77(11) 4 . ?
 N7 Rb3 N4 76.82(10) 4 2_655 ?
 N7 Rb3 N1 88.90(11) 4 4 ?
 N6 Rb3 Rb5 68.11(9) . 4 ?
 N6 Rb3 Si5 108.67(8) . 6_575 ?
 N6 Rb3 Si1 66.46(8) . . ?
 N6 Rb3 Si8 129.85(8) . 6_575 ?
 N6 Rb3 Si3 102.27(8) . . ?
 N6 Rb3 Si9 142.43(8) . 6_575 ?
 N6 Rb3 N3 146.41(10) . . ?
 N6 Rb3 N7 66.69(12) . 4 ?
 N6 Rb3 N4 139.35(10) . 2_655 ?
 N6 Rb3 N1 52.76(9) . 4 ?
 N4 Rb3 Rb5 102.31(7) 2_655 4 ?
 N4 Rb3 Si3 54.47(6) 2_655 . ?
 N4 Rb3 N1 146.02(8) 2_655 4 ?
 N1 Rb3 Rb5 47.24(7) 4 4 ?
 N1 Rb3 Si3 154.74(6) 4 . ?
 Rb5 Rb5 Rb3 104.4(8) 7_566 4_545 ?
 Rb5 Rb5 Si5 83.5(8) 7_566 . ?
 Rb5 Rb5 Si5 87.8(8) 7_566 7_566 ?
 Rb5 Rb5 Si4 123.7(8) 7_566 . ?
 Rb5 Rb5 Si8 60.1(7) 7_566 7_566 ?
 Rb5 Rb5 Si8 112.6(8) 7_566 . ?
 Rb5 Rb5 N7 86.3(8) 7_566 7_566 ?
 Rb5 Rb5 N7 83.9(8) 7_566 . ?
 Rb5 Rb5 N6 137.2(8) 7_566 4_545 ?
 Rb5 Rb5 N1 154.2(8) 7_566 . ?
 Rb5 Rb5 N1 22.2(7) 7_566 7_566 ?
 Si5 Rb5 Rb3 58.69(6) 7_566 4_545 ?
 Si5 Rb5 Rb3 123.68(10) . 4_545 ?
 Si5 Rb5 Si5 171.29(5) 7_566 . ?
 Si5 Rb5 Si4 145.88(8) 7_566 . ?
 Si5 Rb5 Si4 42.34(4) . . ?
 Si5 Rb5 Si8 36.66(4) 7_566 7_566 ?
 Si5 Rb5 Si8 136.24(7) . 7_566 ?
 Si5 Rb5 Si8 38.19(4) . . ?
 Si5 Rb5 Si8 148.08(9) 7_566 . ?
 Si5 Rb5 N6 92.07(10) 7_566 4_545 ?
 Si5 Rb5 N6 94.31(10) . 4_545 ?
 Si5 Rb5 N1 109.78(9) 7_566 7_566 ?
 Si5 Rb5 N1 61.53(8) . 7_566 ?
 Si4 Rb5 Rb3 97.13(8) . 4_545 ?
 Si4 Rb5 N6 56.53(7) . 4_545 ?
 Si8 Rb5 Rb3 131.85(8) . 4_545 ?
 Si8 Rb5 Rb3 53.71(5) 7_566 4_545 ?
 Si8 Rb5 Si4 146.38(11) 7_566 . ?
 Si8 Rb5 Si4 36.35(4) . . ?
 Si8 Rb5 Si8 172.67(8) . 7_566 ?
 Si8 Rb5 N6 88.91(8) . 4_545 ?
 Si8 Rb5 N6 96.85(10) 7_566 4_545 ?
 Si8 Rb5 N1 93.43(10) . 7_566 ?
 N7 Rb5 Rb3 50.67(11) . 4_545 ?
 N7 Rb5 Rb3 132.75(14) 7_566 4_545 ?
 N7 Rb5 Si5 75.92(12) . . ?
 N7 Rb5 Si5 76.36(12) 7_566 7_566 ?
 N7 Rb5 Si5 103.20(13) . 7_566 ?
 N7 Rb5 Si5 102.99(13) 7_566 . ?
 N7 Rb5 Si4 71.00(11) . . ?
 N7 Rb5 Si4 114.94(12) 7_566 . ?
 N7 Rb5 Si8 103.25(13) . . ?
 N7 Rb5 Si8 98.36(12) 7_566 7_566 ?
 N7 Rb5 Si8 80.54(12) 7_566 . ?
 N7 Rb5 Si8 76.71(11) . 7_566 ?
 N7 Rb5 N7 170.20(6) 7_566 . ?
 N7 Rb5 N6 135.06(12) 7_566 4_545 ?
 N7 Rb5 N6 54.54(12) . 4_545 ?
 N7 Rb5 N1 76.81(12) . 7_566 ?
 N7 Rb5 N1 94.04(13) 7_566 7_566 ?
 N7 Rb5 N1 84.71(14) 7_566 . ?
 N7 Rb5 N1 104.20(15) . . ?
 N6 Rb5 Rb3 43.15(7) 4_545 4_545 ?
 N1 Rb5 Rb3 65.62(10) . 4_545 ?
 N1 Rb5 Rb3 113.20(10) 7_566 4_545 ?
 N1 Rb5 Si5 66.59(10) . 7_566 ?
 N1 Rb5 Si5 122.10(10) . . ?
 N1 Rb5 Si4 101.67(10) 7_566 . ?
 N1 Rb5 Si4 81.97(9) . . ?
 N1 Rb5 Si8 97.37(12) . 7_566 ?
 N1 Rb5 Si8 79.39(8) 7_566 7_566 ?
 N1 Rb5 Si8 89.76(9) . . ?
 N1 Rb5 N6 130.32(13) 7_566 4_545 ?
 N1 Rb5 N6 51.46(10) . 4_545 ?
 N1 Rb5 N1 176.34(11) . 7_566 ?
 Rb1 Ni1 Rb1 98.94(2) . 5_666 ?
 Rb1 Ni1 Rb2 123.44(3) . . ?
 Rb1 Ni1 Rb2 109.47(2) . 5_676 ?
 Rb2 Ni1 Rb1 87.14(2) . 5_666 ?
 Rb2 Ni1 Rb1 138.61(2) 5_676 5_666 ?
 Rb2 Ni1 Rb2 100.76(2) 5_676 . ?
 Rb2 Ni1 Rb4 81.63(2) 5_676 5_666 ?
 Rb2 Ni1 Rb4 175.562(15) . 5_666 ?
 Si7 Ni1 Rb1 154.00(3) . 5_666 ?
 Si7 Ni1 Rb1 77.97(4) . . ?
 Si7 Ni1 Rb2 64.21(4) . 5_676 ?
 Si7 Ni1 Rb2 73.88(4) . . ?
 Si7 Ni1 Si6 109.81(5) . 5_676 ?
 Si7 Ni1 Rb4 110.55(4) . 5_666 ?
 Si6 Ni1 Rb1 171.32(3) 5_676 . ?
 Si6 Ni1 Rb1 75.82(3) 5_676 5_666 ?
 Si6 Ni1 Rb2 63.77(4) 5_676 . ?
 Si6 Ni1 Rb2 71.86(3) 5_676 5_676 ?
 Si6 Ni1 Rb4 113.87(4) 5_676 5_666 ?
 C1 Ni1 Rb1 52.21(14) . 5_666 ?
 C1 Ni1 Rb1 82.21(14) . . ?
 C1 Ni1 Rb2 57.89(14) . . ?
 C1 Ni1 Rb2 158.12(14) . 5_676 ?
 C1 Ni1 Si7 101.99(14) . . ?
 C1 Ni1 Si6 99.47(14) . 5_676 ?
 C1 Ni1 C2 136.3(2) . . ?
 C1 Ni1 Rb4 120.01(14) . 5_666 ?
 C2 Ni1 Rb1 99.73(14) . 5_666 ?
 C2 Ni1 Rb1 68.79(13) . . ?
 C2 Ni1 Rb2 165.15(14) . . ?
 C2 Ni1 Rb2 65.44(14) . 5_676 ?
 C2 Ni1 Si7 102.99(14) . . ?
 C2 Ni1 Si6 104.95(14) . 5_676 ?
 C2 Ni1 Rb4 16.30(14) . 5_666 ?
 Rb1 Si2 Rb2 69.82(3) 1_565 5_676 ?
 Rb1 Si2 Rb2 103.99(3) 1_565 . ?
 Rb1 Si2 Rb3 145.30(3) 1_565 . ?
 Rb2 Si2 Rb2 67.58(2) 5_676 . ?
 Rb3 Si2 Rb2 66.48(3) . . ?
 Rb3 Si2 Rb2 127.80(3) . 5_676 ?
 Si5 Si2 Rb1 114.28(4) . 1_565 ?
 Si5 Si2 Rb2 77.99(4) . 5_676 ?
 Si5 Si2 Rb2 114.22(4) . . ?
 Si5 Si2 Rb3 99.54(4) . . ?
 Si5 Si2 Si3 90.21(5) . . ?
 Si1 Si2 Rb1 169.58(5) . 1_565 ?
 Si1 Si2 Rb2 112.48(5) . 5_676 ?
 Si1 Si2 Rb2 86.04(4) . . ?
 Si1 Si2 Rb3 41.73(3) . . ?
 Si1 Si2 Si5 57.80(4) . . ?
 Si1 Si2 Si3 56.30(5) . . ?
 Si1 Si2 Si9 107.49(6) . . ?
 Si6 Si2 Rb1 78.15(4) . 1_565 ?
 Si6 Si2 Rb2 38.32(3) . . ?
 Si6 Si2 Rb2 30.66(3) . 5_676 ?
 Si6 Si2 Rb3 103.86(5) . . ?
 Si6 Si2 Si5 100.81(5) . . ?
 Si6 Si2 Si1 109.16(6) . . ?
 Si6 Si2 Si3 57.70(4) . . ?
 Si6 Si2 Si9 60.18(5) . . ?
 Si3 Si2 Rb1 133.23(4) . 1_565 ?
 Si3 Si2 Rb2 78.03(3) . 5_676 ?
 Si3 Si2 Rb2 30.41(3) . . ?
 Si3 Si2 Rb3 49.76(3) . . ?
 Si9 Si2 Rb1 69.18(4) . 1_565 ?
 Si9 Si2 Rb2 95.77(5) . . ?
 Si9 Si2 Rb2 29.56(3) . 5_676 ?
 Si9 Si2 Rb3 142.29(5) . . ?
 Si9 Si2 Si5 56.08(4) . . ?
 Si9 Si2 Si3 97.99(5) . . ?
 Rb1 Si5 Rb2 59.873(15) 1_565 5_676 ?
 Rb3 Si5 Rb1 85.36(3) 6_576 1_565 ?
 Rb3 Si5 Rb2 67.47(3) 6_576 5_676 ?
 Rb5 Si5 Rb1 155.18(7) . 1_565 ?
 Rb5 Si5 Rb1 151.09(6) 7_566 1_565 ?
 Rb5 Si5 Rb2 112.48(6) 7_566 5_676 ?
 Rb5 Si5 Rb2 107.61(5) . 5_676 ?
 Rb5 Si5 Rb3 66.84(7) 7_566 6_576 ?
 Rb5 Si5 Rb3 69.82(7) . 6_576 ?
 Rb5 Si5 Rb5 8.71(5) 7_566 . ?
 Si2 Si5 Rb1 39.91(3) . 1_565 ?
 Si2 Si5 Rb2 74.64(4) . 5_676 ?
 Si2 Si5 Rb3 124.47(5) . 6_576 ?
 Si2 Si5 Rb5 168.69(8) . 7_566 ?
 Si2 Si5 Rb5 163.57(7) . . ?
 Si2 Si5 Si4 88.17(5) . . ?
 Si4 Si5 Rb1 117.31(4) . 1_565 ?
 Si4 Si5 Rb2 77.73(3) . 5_676 ?
 Si4 Si5 Rb3 119.90(4) . 6_576 ?
 Si4 Si5 Rb5 84.98(5) . 7_566 ?
 Si4 Si5 Rb5 76.67(5) . . ?
 Si1 Si5 Rb1 97.49(4) . 1_565 ?
 Si1 Si5 Rb2 110.22(5) . 5_676 ?
 Si1 Si5 Rb3 174.82(5) . 6_576 ?
 Si1 Si5 Rb5 107.20(8) . . ?
 Si1 Si5 Rb5 110.86(8) . 7_566 ?
 Si1 Si5 Si2 57.86(5) . . ?
 Si1 Si5 Si4 54.93(4) . . ?
 Si8 Si5 Rb1 97.24(5) . 1_565 ?
 Si8 Si5 Rb2 37.37(4) . 5_676 ?
 Si8 Si5 Rb3 67.73(4) . 6_576 ?
 Si8 Si5 Rb5 73.24(6) . . ?
 Si8 Si5 Rb5 80.00(6) . 7_566 ?
 Si8 Si5 Si2 103.40(5) . . ?
 Si8 Si5 Si4 55.34(4) . . ?
 Si8 Si5 Si1 107.51(6) . . ?
 Si9 Si5 Rb1 34.94(4) . 1_565 ?
 Si9 Si5 Rb2 25.27(4) . 5_676 ?
 Si9 Si5 Rb3 69.86(4) . 6_576 ?
 Si9 Si5 Rb5 128.42(7) . . ?
 Si9 Si5 Rb5 130.74(8) . 7_566 ?
 Si9 Si5 Si2 59.08(5) . . ?
 Si9 Si5 Si4 97.24(5) . . ?
 Si9 Si5 Si1 110.19(6) . . ?
 Si9 Si5 Si8 62.50(5) . . ?
 Rb1 Si4 Rb2 94.86(3) . . ?
 Rb1 Si4 Rb3 131.94(3) . . ?
 Rb1 Si4 Rb5 82.68(4) . . ?
 Rb1 Si4 Rb5 88.51(4) . 7_566 ?
 Rb3 Si4 Rb2 67.42(3) . . ?
 Rb5 Si4 Rb2 166.62(6) . . ?
 Rb5 Si4 Rb2 164.94(6) 7_566 . ?
 Rb5 Si4 Rb3 123.62(6) . . ?
 Rb5 Si4 Rb3 120.29(5) 7_566 . ?
 Rb5 Si4 Rb5 6.01(7) . 7_566 ?
 Si5 Si4 Rb1 130.16(4) . . ?
 Si5 Si4 Rb2 112.60(4) . . ?
 Si5 Si4 Rb3 97.50(4) . . ?
 Si5 Si4 Rb5 60.99(5) . . ?
 Si5 Si4 Rb5 55.41(5) . 7_566 ?
 Si1 Si4 Rb1 171.43(5) . . ?
 Si1 Si4 Rb2 88.20(4) . . ?
 Si1 Si4 Rb3 42.55(3) . . ?
 Si1 Si4 Rb5 96.13(6) . . ?
 Si1 Si4 Rb5 90.59(6) . 7_566 ?
 Si1 Si4 Si5 54.99(4) . . ?
 Si1 Si4 Si8 106.60(6) . . ?
 Si1 Si4 Si3 58.21(5) . . ?
 Si7 Si4 Rb1 78.16(4) . . ?
 Si7 Si4 Rb2 43.36(3) . . ?
 Si7 Si4 Rb3 108.27(5) . . ?
 Si7 Si4 Rb5 123.50(7) . . ?
 Si7 Si4 Rb5 123.83(7) . 7_566 ?
 Si7 Si4 Si5 93.82(5) . . ?
 Si7 Si4 Si1 109.28(6) . . ?
 Si7 Si4 Si8 59.68(5) . . ?
 Si7 Si4 Si3 59.95(4) . . ?
 Si8 Si4 Rb1 80.66(4) . . ?
 Si8 Si4 Rb2 101.63(5) . . ?
 Si8 Si4 Rb3 144.76(5) . . ?
 Si8 Si4 Rb5 65.01(7) . . ?
 Si8 Si4 Rb5 64.39(7) . 7_566 ?
 Si8 Si4 Si5 54.32(4) . . ?
 Si8 Si4 Si3 103.43(6) . . ?
 Si3 Si4 Rb1 125.34(5) . . ?
 Si3 Si4 Rb2 30.49(3) . . ?
 Si3 Si4 Rb3 49.92(3) . . ?
 Si3 Si4 Rb5 149.05(6) . . ?
 Si3 Si4 Rb5 143.09(6) . 7_566 ?
 Si3 Si4 Si5 88.65(5) . . ?
 Rb3 Si1 Rb5 140.81(6) . 7_566 ?
 Rb3 Si1 Rb5 138.38(6) . . ?
 Rb5 Si1 Rb5 6.25(4) . 7_566 ?
 Si2 Si1 Rb3 112.65(5) . . ?
 Si2 Si1 Rb5 106.53(6) . 7_566 ?
 Si2 Si1 Rb5 108.66(6) . . ?
 Si5 Si1 Rb3 176.96(6) . . ?
 Si5 Si1 Rb5 44.66(6) . . ?
 Si5 Si1 Rb5 42.20(6) . 7_566 ?
 Si5 Si1 Si2 64.34(5) . . ?
 Si4 Si1 Rb3 111.43(5) . . ?
 Si4 Si1 Rb5 54.49(4) . . ?
 Si4 Si1 Rb5 60.43(4) . 7_566 ?
 Si4 Si1 Si2 100.78(6) . . ?
 Si4 Si1 Si5 70.08(5) . . ?
 Si3 Si1 Rb3 78.46(5) . . ?
 Si3 Si1 Rb5 114.75(5) . . ?
 Si3 Si1 Rb5 119.68(5) . 7_566 ?
 Si3 Si1 Si2 66.41(5) . . ?
 Si3 Si1 Si5 100.24(6) . . ?
 Si3 Si1 Si4 62.65(5) . . ?
 Rb1 Si7 Rb2 116.86(3) . . ?
 Rb2 Si7 Rb1 111.94(3) 5_676 . ?
 Rb2 Si7 Rb2 106.55(3) 5_676 . ?
 Ni1 Si7 Rb1 67.10(3) . . ?
 Ni1 Si7 Rb2 80.56(4) . 5_676 ?
 Ni1 Si7 Rb2 72.44(3) . . ?
 Ni1 Si7 Si4 126.85(6) . . ?
 Ni1 Si7 Si6 122.68(5) . . ?
 Ni1 Si7 Si8 124.19(5) . . ?
 Ni1 Si7 Si3 127.21(5) . . ?
 Si4 Si7 Rb1 64.53(4) . . ?
 Si4 Si7 Rb2 137.92(5) . 5_676 ?
 Si4 Si7 Rb2 111.86(4) . . ?
 Si4 Si7 Si3 61.77(5) . . ?
 Si6 Si7 Rb1 170.11(5) . . ?
 Si6 Si7 Rb2 70.61(4) . 5_676 ?
 Si6 Si7 Rb2 70.17(3) . . ?
 Si6 Si7 Si4 106.89(6) . . ?
 Si6 Si7 Si8 97.17(5) . . ?
 Si6 Si7 Si3 60.57(4) . . ?
 Si8 Si7 Rb1 74.51(4) . . ?
 Si8 Si7 Rb2 163.35(5) . . ?
 Si8 Si7 Rb2 77.98(4) . 5_676 ?
 Si8 Si7 Si4 60.37(5) . . ?
 Si8 Si7 Si3 105.26(5) . . ?
 Si3 Si7 Rb1 115.85(5) . . ?
 Si3 Si7 Rb2 131.15(5) . 5_676 ?
 Si3 Si7 Rb2 59.44(4) . . ?
 Rb2 Si6 Rb1 136.51(3) . 1_565 ?
 Rb2 Si6 Rb1 90.73(3) 5_676 1_565 ?
 Rb2 Si6 Rb2 108.59(3) 5_676 . ?
 Ni1 Si6 Rb1 71.05(3) 5_676 1_565 ?
 Ni1 Si6 Rb2 73.94(3) 5_676 . ?
 Ni1 Si6 Rb2 81.15(4) 5_676 5_676 ?
 Ni1 Si6 Si2 126.41(6) 5_676 . ?
 Ni1 Si6 Si7 127.47(5) 5_676 . ?
 Ni1 Si6 Si3 130.01(5) 5_676 . ?
 Ni1 Si6 Si9 124.47(6) 5_676 . ?
 Si2 Si6 Rb1 66.59(4) . 1_565 ?
 Si2 Si6 Rb2 129.34(5) . 5_676 ?
 Si2 Si6 Rb2 119.10(5) . . ?
 Si2 Si6 Si3 66.24(5) . . ?
 Si2 Si6 Si9 60.98(5) . . ?
 Si7 Si6 Rb1 148.60(4) . 1_565 ?
 Si7 Si6 Rb2 70.57(4) . 5_676 ?
 Si7 Si6 Rb2 74.58(4) . . ?
 Si7 Si6 Si2 105.54(6) . . ?
 Si7 Si6 Si3 61.52(5) . . ?
 Si7 Si6 Si9 84.97(5) . . ?
 Si3 Si6 Rb1 130.30(5) . 1_565 ?
 Si3 Si6 Rb2 132.05(5) . 5_676 ?
 Si3 Si6 Rb2 61.30(4) . . ?
 Si9 Si6 Rb1 64.40(4) . 1_565 ?
 Si9 Si6 Rb2 158.85(5) . . ?
 Si9 Si6 Rb2 68.39(4) . 5_676 ?
 Si9 Si6 Si3 104.25(5) . . ?
 Rb2 Si8 Rb1 103.81(3) 5_676 . ?
 Rb2 Si8 Rb5 153.91(6) 5_676 7_566 ?
 Rb3 Si8 Rb1 133.78(3) 6_576 . ?
 Rb3 Si8 Rb2 90.85(3) 6_576 5_676 ?
 Rb3 Si8 Rb5 70.34(6) 6_576 . ?
 Rb3 Si8 Rb5 64.55(6) 6_576 7_566 ?
 Rb5 Si8 Rb1 88.83(5) 7_566 . ?
 Rb5 Si8 Rb1 81.49(5) . . ?
 Rb5 Si8 Rb2 156.80(7) . 5_676 ?
 Rb5 Si8 Rb5 7.33(8) . 7_566 ?
 Si5 Si8 Rb1 128.05(5) . . ?
 Si5 Si8 Rb2 120.52(5) . 5_676 ?
 Si5 Si8 Rb3 74.45(4) . 6_576 ?
 Si5 Si8 Rb5 63.34(6) . 7_566 ?
 Si5 Si8 Rb5 68.56(6) . . ?
 Si5 Si8 Si4 70.34(5) . . ?
 Si5 Si8 Si7 104.55(5) . . ?
 Si5 Si8 Si9 58.10(5) . . ?
 Si4 Si8 Rb1 62.58(4) . . ?
 Si4 Si8 Rb2 124.06(5) . 5_676 ?
 Si4 Si8 Rb3 139.54(5) . 6_576 ?
 Si4 Si8 Rb5 81.99(7) . 7_566 ?
 Si4 Si8 Rb5 78.64(7) . . ?
 Si4 Si8 Si9 104.36(5) . . ?
 Si7 Si8 Rb1 70.02(4) . . ?
 Si7 Si8 Rb2 64.44(4) . 5_676 ?
 Si7 Si8 Rb3 151.25(6) . 6_576 ?
 Si7 Si8 Rb5 136.98(7) . . ?
 Si7 Si8 Rb5 141.58(7) . 7_566 ?
 Si7 Si8 Si4 59.94(5) . . ?
 Si7 Si8 Si9 83.15(5) . . ?
 Si9 Si8 Rb1 153.16(5) . . ?
 Si9 Si8 Rb2 62.51(4) . 5_676 ?
 Si9 Si8 Rb3 71.91(4) . 6_576 ?
 Si9 Si8 Rb5 113.54(6) . 7_566 ?
 Si9 Si8 Rb5 120.59(6) . . ?
 Rb1 Si3 Rb2 68.878(17) . 5_676 ?
 Rb2 Si3 Rb1 95.20(3) . . ?
 Rb2 Si3 Rb2 81.35(3) . 5_676 ?
 Rb2 Si3 Rb3 102.59(4) . . ?
 Rb3 Si3 Rb1 114.78(3) . . ?
 Rb3 Si3 Rb2 174.07(3) . 5_676 ?
 Si2 Si3 Rb1 117.45(4) . . ?
 Si2 Si3 Rb2 74.00(3) . 5_676 ?
 Si2 Si3 Rb2 126.72(5) . . ?
 Si2 Si3 Rb3 100.07(4) . . ?
 Si4 Si3 Rb1 32.64(3) . . ?
 Si4 Si3 Rb2 79.08(4) . 5_676 ?
 Si4 Si3 Rb2 127.82(5) . . ?
 Si4 Si3 Rb3 101.54(4) . . ?
 Si4 Si3 Si2 92.98(5) . . ?
 Si1 Si3 Rb1 91.43(4) . . ?
 Si1 Si3 Rb2 110.20(5) . 5_676 ?
 Si1 Si3 Rb2 168.20(5) . . ?
 Si1 Si3 Rb3 65.71(4) . . ?
 Si1 Si3 Si2 57.29(5) . . ?
 Si1 Si3 Si4 59.15(5) . . ?
 Si1 Si3 Si7 108.67(6) . . ?
 Si1 Si3 Si6 108.56(6) . . ?
 Si7 Si3 Rb1 40.17(3) . . ?
 Si7 Si3 Rb2 82.54(5) . . ?
 Si7 Si3 Rb2 29.19(3) . 5_676 ?
 Si7 Si3 Rb3 154.91(5) . . ?
 Si7 Si3 Si2 96.04(5) . . ?
 Si7 Si3 Si4 58.29(4) . . ?
 Si6 Si3 Rb1 97.56(4) . . ?
 Si6 Si3 Rb2 80.26(4) . . ?
 Si6 Si3 Rb2 28.76(3) . 5_676 ?
 Si6 Si3 Rb3 146.90(5) . . ?
 Si6 Si3 Si2 56.06(4) . . ?
 Si6 Si3 Si4 102.23(5) . . ?
 Si6 Si3 Si7 57.91(5) . . ?
 Rb1 Si9 Rb5 149.21(4) 1_565 . ?
 Rb1 Si9 Rb5 143.79(4) 1_565 7_566 ?
 Rb2 Si9 Rb1 97.67(3) 5_676 1_565 ?
 Rb2 Si9 Rb3 95.72(3) 5_676 6_576 ?
 Rb2 Si9 Rb5 111.18(4) 5_676 . ?
 Rb2 Si9 Rb5 115.33(4) 5_676 7_566 ?
 Rb3 Si9 Rb1 117.30(3) 6_576 1_565 ?
 Rb3 Si9 Rb5 48.22(4) 6_576 7_566 ?
 Rb3 Si9 Rb5 51.19(4) 6_576 . ?
 Rb5 Si9 Rb5 5.77(4) . 7_566 ?
 Si2 Si9 Rb1 72.90(4) . 1_565 ?
 Si2 Si9 Rb2 130.27(5) . 5_676 ?
 Si2 Si9 Rb3 132.56(5) . 6_576 ?
 Si2 Si9 Rb5 94.66(6) . 7_566 ?
 Si2 Si9 Rb5 95.07(6) . . ?
 Si2 Si9 Si8 105.29(6) . . ?
 Si5 Si9 Rb1 123.70(5) . 1_565 ?
 Si5 Si9 Rb2 137.96(6) . 5_676 ?
 Si5 Si9 Rb3 73.21(4) . 6_576 ?
 Si5 Si9 Rb5 30.01(5) . 7_566 ?
 Si5 Si9 Rb5 31.54(5) . . ?
 Si5 Si9 Si2 64.84(5) . . ?
 Si5 Si9 Si6 106.27(5) . . ?
 Si5 Si9 Si8 59.40(5) . . ?
 Si6 Si9 Rb1 79.57(4) . 1_565 ?
 Si6 Si9 Rb2 71.47(4) . 5_676 ?
 Si6 Si9 Rb3 160.68(5) . 6_576 ?
 Si6 Si9 Rb5 123.53(6) . 7_566 ?
 Si6 Si9 Rb5 118.97(5) . . ?
 Si6 Si9 Si2 58.84(5) . . ?
 Si6 Si9 Si8 94.17(5) . . ?
 Si8 Si9 Rb1 173.55(5) . 1_565 ?
 Si8 Si9 Rb2 78.69(4) . 5_676 ?
 Si8 Si9 Rb3 68.61(4) . 6_576 ?
 Si8 Si9 Rb5 41.84(4) . 7_566 ?
 Si8 Si9 Rb5 36.24(4) . . ?
 Rb1 N2 Rb5 79.11(9) 6_565 6_565 ?
 Rb1 N2 Rb5 82.91(10) 6_565 4_545 ?
 Rb5 N2 Rb5 4.15(8) 6_565 4_545 ?
 Rb2 O2 Rb1 111.50(9) 5_676 . ?
 C2 O2 Rb1 62.8(2) . . ?
 C2 O2 Rb2 75.2(3) . 5_676 ?
 C2 O2 Rb4 139.9(3) . 5_666 ?
 C2 O2 K4A 137.2(6) . 6_566 ?
 C2 O2 K4A 141.3(6) . 5_666 ?
 Rb4 O2 Rb2 144.49(11) 5_666 5_676 ?
 K4A O2 Rb2 147.5(5) 6_566 5_676 ?
 K4A O2 Rb2 141.1(4) 5_666 5_676 ?
 K4A O2 K4A 13.9(8) 6_566 5_666 ?
 Rb2 N3 Rb1 144.14(11) . 6_565 ?
 Rb2 N3 Rb1 80.56(7) 2_655 6_565 ?
 Rb2 N3 Rb2 71.78(8) 2_655 . ?
 Rb2 N3 Rb3 99.19(10) 2_655 . ?
 Rb2 N3 Rb3 111.56(11) . . ?
 Rb3 N3 Rb1 94.74(8) . 6_565 ?
 Rb4 N3 Rb2 87.86(10) . . ?
 Rb4 N3 Rb2 88.59(10) . 2_655 ?
 Rb4 N3 Rb3 160.47(13) . . ?
 K4A N3 Rb2 85.4(4) . . ?
 K4A N3 Rb2 90.5(5) 2_655 . ?
 K4A N3 Rb2 94.1(4) 2_655 2_655 ?
 K4A N3 Rb2 83.7(4) . 2_655 ?
 K4A N3 Rb3 156.9(5) 2_655 . ?
 K4A N3 Rb3 162.9(5) . . ?
 Rb1 O1 Rb1 96.59(7) 5_666 . ?
 Rb1 O1 Rb2 114.83(10) 5_666 . ?
 Rb2 O1 Rb1 119.68(8) . . ?
 C1 O1 Rb1 79.1(3) . 5_666 ?
 C1 O1 Rb1 50.3(2) . . ?
 C1 O1 Rb2 85.4(3) . . ?
 C1 O1 Rb4 178.5(3) . . ?
 C1 O1 K4A 174.5(5) . . ?
 C1 O1 K4A 171.9(6) . 2_655 ?
 Rb4 O1 Rb2 93.77(9) . . ?
 K4A O1 Rb2 92.2(3) . . ?
 K4A O1 Rb2 94.9(3) 2_655 . ?
 K4A O1 K4A 13.4(9) 2_655 . ?
 Rb3 N7 Rb5 78.50(12) 4_545 . ?
 Rb5 N7 Rb3 82.66(12) 7_566 4_545 ?
 Rb5 N7 Rb5 9.79(6) 7_566 . ?
 Rb1 N6 Rb5 77.46(8) 4 4 ?
 Rb1 N6 Rb5 82.01(8) 4 6_575 ?
 Rb3 N6 Rb1 132.70(12) . 4 ?
 Rb3 N6 Rb5 68.74(9) . 4 ?
 Rb3 N6 Rb5 65.85(9) . 6_575 ?
 Rb5 N6 Rb5 4.78(8) 4 6_575 ?
 Rb2 N4 Rb2 78.93(9) . 2_655 ?
 Rb2 N4 Rb3 112.47(11) 2_655 2_655 ?
 Rb2 N4 Rb3 100.23(10) . 2_655 ?
 Rb2 N4 Rb4 106.34(9) . 1_565 ?
 Rb2 N4 Rb4 105.14(9) 2_655 1_565 ?
 Rb3 N4 Rb4 137.26(10) 2_655 1_565 ?
 Rb1 N1 Rb3 122.86(12) . 4_545 ?
 Rb1 N1 Rb3 108.28(11) . 6_566 ?
 Rb1 N1 Rb5 104.73(13) . 7_566 ?
 Rb3 N1 Rb3 112.37(10) 4_545 6_566 ?
 Rb5 N1 Rb1 101.17(14) . . ?
 Rb5 N1 Rb3 67.13(10) . 4_545 ?
 Rb5 N1 Rb3 142.48(13) . 6_566 ?
 Rb5 N1 Rb3 139.15(12) 7_566 6_566 ?
 Rb5 N1 Rb3 66.05(9) 7_566 4_545 ?
 Rb5 N1 Rb5 3.66(11) . 7_566 ?
 Rb1 C1 Rb2 112.07(12) 5_666 . ?
 Rb2 C1 Rb4 73.86(8) . . ?
 Ni1 C1 Rb1 102.63(17) . 5_666 ?
 Ni1 C1 Rb2 96.26(17) . . ?
 Ni1 C1 Rb4 170.1(2) . . ?
 O1 C1 Rb1 80.1(3) . 5_666 ?
 O1 C1 Rb2 74.4(3) . . ?
 O1 C1 Ni1 170.6(4) . . ?
 O1 C1 Rb4 1.0(2) . . ?
 Rb2 C2 Rb1 129.04(10) 5_676 5_666 ?
 Rb2 C2 Rb4 115.22(11) 5_676 5_666 ?
 Ni1 C2 Rb1 58.38(12) . 5_666 ?
 Ni1 C2 Rb2 88.27(16) . 5_676 ?
 Ni1 C2 Rb4 156.3(2) . 5_666 ?
 O2 C2 Rb1 125.1(3) . 5_666 ?
 O2 C2 Rb2 86.6(3) . 5_676 ?
 O2 C2 Ni1 174.9(4) . . ?
 O2 C2 Rb4 28.8(2) . 5_666 ?
 N2 Rb4 N2 145.97(16) 2_655 . ?
 N2 Rb4 N8 121.60(9) . 2_655 ?
 N2 Rb4 N8 121.61(9) 2_655 . ?
 N2 Rb4 N8 53.46(9) 2_655 2_655 ?
 N2 Rb4 N8 53.46(9) . . ?
 N2 Rb4 C2 68.30(9) . 6_565 ?
 N2 Rb4 C2 68.30(9) 2_655 5_666 ?
 N2 Rb4 C2 89.46(10) 2_655 6_565 ?
 N2 Rb4 C2 89.46(10) . 5_666 ?
 O2 Rb4 N2 68.54(11) 6_565 . ?
 O2 Rb4 N2 68.54(11) 5_666 2_655 ?
 O2 Rb4 N2 84.65(11) 5_666 . ?
 O2 Rb4 N2 84.65(11) 6_565 2_655 ?
 O2 Rb4 O2 76.71(14) 6_565 5_666 ?
 O2 Rb4 N3 128.29(10) 6_565 . ?
 O2 Rb4 N3 128.29(10) 5_666 2_655 ?
 O2 Rb4 N3 121.36(10) 6_565 2_655 ?
 O2 Rb4 N3 121.36(10) 5_666 . ?
 O2 Rb4 N8 60.25(10) 6_565 2_655 ?
 O2 Rb4 N8 107.76(11) 6_565 . ?
 O2 Rb4 N8 60.25(10) 5_666 . ?
 O2 Rb4 N8 107.76(11) 5_666 2_655 ?
 O2 Rb4 C2 11.28(9) 6_565 6_565 ?
 O2 Rb4 C2 87.96(10) 6_565 5_666 ?
 O2 Rb4 C2 87.96(10) 5_666 6_565 ?
 O2 Rb4 C2 11.28(9) 5_666 5_666 ?
 N3 Rb4 N2 66.14(11) . . ?
 N3 Rb4 N2 146.09(11) 2_655 . ?
 N3 Rb4 N2 146.09(11) . 2_655 ?
 N3 Rb4 N3 86.74(16) 2_655 . ?
 N3 Rb4 N8 130.87(11) . 2_655 ?
 N3 Rb4 N8 61.50(10) 2_655 2_655 ?
 N3 Rb4 N8 61.50(10) . . ?
 N3 Rb4 N8 130.87(11) 2_655 . ?
 N3 Rb4 C2 114.81(10) . 5_666 ?
 N3 Rb4 C2 121.50(9) 2_655 5_666 ?
 N3 Rb4 C2 114.81(10) 2_655 6_565 ?
 N3 Rb4 C2 121.50(9) . 6_565 ?
 N8 Rb4 N8 166.00(15) . 2_655 ?
 O1 Rb4 N2 81.98(10) 2_655 . ?
 O1 Rb4 N2 108.02(10) 2_655 2_655 ?
 O1 Rb4 N2 108.03(10) . . ?
 O1 Rb4 N2 81.98(10) . 2_655 ?
 O1 Rb4 O2 145.23(11) 2_655 5_666 ?
 O1 Rb4 O2 68.53(10) . 5_666 ?
 O1 Rb4 O2 145.23(11) . 6_565 ?
 O1 Rb4 O2 68.53(10) 2_655 6_565 ?
 O1 Rb4 N3 81.65(10) . 2_655 ?
 O1 Rb4 N3 81.66(10) 2_655 . ?
 O1 Rb4 N3 73.92(10) 2_655 2_655 ?
 O1 Rb4 N3 73.92(10) . . ?
 O1 Rb4 N8 129.91(9) . 2_655 ?
 O1 Rb4 N8 55.20(10) . . ?
 O1 Rb4 N8 129.91(9) 2_655 . ?
 O1 Rb4 N8 55.19(10) 2_655 2_655 ?
 O1 Rb4 O1 146.24(16) . 2_655 ?
 O1 Rb4 C2 156.49(10) . 6_565 ?
 O1 Rb4 C2 57.27(10) 2_655 6_565 ?
 O1 Rb4 C2 57.27(10) . 5_666 ?
 O1 Rb4 C2 156.49(10) 2_655 5_666 ?
 C2 Rb4 N8 55.93(9) 5_666 . ?
 C2 Rb4 N8 113.72(10) 5_666 2_655 ?
 C2 Rb4 N8 113.72(10) 6_565 . ?
 C2 Rb4 N8 55.93(9) 6_565 2_655 ?
 C2 Rb4 C2 99.22(13) 6_565 5_666 ?
 Rb2 K4A Rb2 132.2(6) . 1_545 ?
 Rb2 K4A Rb2 167.2(5) . 2_645 ?
 Rb2 K4A Rb2 170.5(6) 2_655 1_545 ?
 Rb2 K4A Rb2 136.7(6) 2_655 2_645 ?
 Rb2 K4A Rb2 52.82(15) 2_655 . ?
 Rb2 K4A Rb2 36.91(7) 2_645 1_545 ?
 N2 K4A Rb2 82.2(3) 2_655 2_645 ?
 N2 K4A Rb2 121.9(5) 2_655 2_655 ?
 N2 K4A Rb2 67.0(3) 2_655 1_545 ?
 N2 K4A Rb2 99.2(6) 2_655 . ?
 N2 K4A N3 147.1(9) 2_655 . ?
 O2 K4A Rb2 169.4(9) 6_565 . ?
 O2 K4A Rb2 18.6(3) 6_565 2_645 ?
 O2 K4A Rb2 57.2(3) 5_666 2_645 ?
 O2 K4A Rb2 118.4(8) 6_565 2_655 ?
 O2 K4A Rb2 158.7(6) 5_666 2_655 ?
 O2 K4A Rb2 55.5(3) 6_565 1_545 ?
 O2 K4A Rb2 111.0(7) 5_666 . ?
 O2 K4A Rb2 21.6(2) 5_666 1_545 ?
 O2 K4A N2 70.7(5) 5_666 2_655 ?
 O2 K4A N2 90.8(5) 6_565 2_655 ?
 O2 K4A O2 75.7(3) 6_565 5_666 ?
 O2 K4A N3 121.7(9) 6_565 . ?
 O2 K4A N3 110.2(6) 5_666 . ?
 O2 K4A O1 139.6(7) 6_565 . ?
 O2 K4A O1 64.8(5) 5_666 . ?
 N3 K4A Rb2 50.5(3) 2_655 2_655 ?
 N3 K4A Rb2 142.7(6) 2_655 2_645 ?
 N3 K4A Rb2 138.9(7) 2_655 1_545 ?
 N3 K4A Rb2 48.1(3) 2_655 . ?
 N3 K4A Rb2 49.3(2) . 2_655 ?
 N3 K4A Rb2 127.2(6) . 2_645 ?
 N3 K4A Rb2 125.6(5) . 1_545 ?
 N3 K4A Rb2 48.8(2) . . ?
 N3 K4A N2 72.5(6) 2_655 2_655 ?
 N3 K4A O2 132.7(11) 2_655 5_666 ?
 N3 K4A O2 133.5(8) 2_655 6_565 ?
 N3 K4A N3 86.2(4) 2_655 . ?
 N3 K4A O1 82.8(6) 2_655 . ?
 O1 K4A Rb2 47.5(3) 2_655 2_655 ?
 O1 K4A Rb2 126.8(5) 2_655 1_545 ?
 O1 K4A Rb2 46.3(2) . . ?
 O1 K4A Rb2 89.9(5) 2_655 2_645 ?
 O1 K4A Rb2 121.8(4) . 2_645 ?
 O1 K4A Rb2 100.3(4) 2_655 . ?
 O1 K4A Rb2 97.8(4) . 2_655 ?
 O1 K4A Rb2 86.0(4) . 1_545 ?
 O1 K4A N2 83.9(8) . 2_655 ?
 O1 K4A N2 119.6(7) 2_655 2_655 ?
 O1 K4A O2 145.3(8) 2_655 5_666 ?
 O1 K4A O2 71.3(7) 2_655 6_565 ?
 O1 K4A N3 79.3(6) 2_655 . ?
 O1 K4A N3 79.8(5) 2_655 2_655 ?
 O1 K4A N3 68.4(4) . . ?
 O1 K4A O1 144.1(6) 2_655 . ?
 K4A K4A Rb2 92.4(14) 2_655 2_645 ?
 K4A K4A Rb2 81.0(14) 2_655 1_545 ?
 K4A K4A Rb2 77(2) 2_655 . ?
 K4A K4A Rb2 93(2) 2_655 2_655 ?
 K4A K4A N2 133(5) 2_655 2_655 ?
 K4A K4A O2 68(3) 2_655 5_666 ?
 K4A K4A O2 98(3) 2_655 6_565 ?
 K4A K4A N3 124.9(16) 2_655 2_655 ?
 K4A K4A N3 44.6(13) 2_655 . ?
 K4A K4A O1 107(5) 2_655 2_655 ?
 K4A K4A O1 60(4) 2_655 . ?

loop_
  _geom_torsion_atom_site_label_1
  _geom_torsion_atom_site_label_2
  _geom_torsion_atom_site_label_3
  _geom_torsion_atom_site_label_4
  _geom_torsion
  _geom_torsion_site_symmetry_1
  _geom_torsion_site_symmetry_2
  _geom_torsion_site_symmetry_3
  _geom_torsion_site_symmetry_4
  _geom_torsion_publ_flag
 Rb1 Ni1 C1 Rb1 -107.73(11) . . . 5_666 ?
 Rb1 Ni1 C1 Rb2 -114.33(16) 5_666 . . . ?
 Rb1 Ni1 C1 Rb2 137.94(10) . . . . ?
 Rb1 Ni1 C2 Rb1 95.88(6) . . . 5_666 ?
 Rb1 Ni1 C2 Rb2 -124.78(10) . . . 5_676 ?
 Rb1 Ni1 C2 Rb2 139.34(5) 5_666 . . 5_676 ?
 Rb1 O2 C2 Rb1 -98.9(3) . . . 5_666 ?
 Rb1 O2 C2 Rb2 124.20(14) . . . 5_676 ?
 Rb1 O1 C1 Rb1 108.2(2) . . . 5_666 ?
 Rb1 O1 C1 Rb2 -135.45(19) . . . . ?
 Rb1 O1 C1 Rb2 116.39(8) 5_666 . . . ?
 Rb2 Ni1 C1 Rb1 128.1(3) 5_676 . . 5_666 ?
 Rb2 Ni1 C1 Rb1 114.33(16) . . . 5_666 ?
 Rb2 Ni1 C1 Rb2 13.7(4) 5_676 . . . ?
 Rb2 Ni1 C2 Rb1 -116.7(5) . . . 5_666 ?
 Rb2 Ni1 C2 Rb1 -139.34(5) 5_676 . . 5_666 ?
 Rb2 Ni1 C2 Rb2 22.6(5) . . . 5_676 ?
 Rb2 Ni1 C2 Rb4 -164.32(16) . . . 5_666 ?
 Rb2 Ni1 C2 Rb4 173.0(5) 5_676 . . 5_666 ?
 Rb2 O2 C2 Rb1 136.9(3) 5_676 . . 5_666 ?
 Rb2 O2 C2 Rb4 -173.4(4) 5_676 . . 5_666 ?
 Rb2 O1 C1 Rb1 -116.39(8) . . . 5_666 ?
 Rb2 O1 C1 Rb4 55(14) . . . . ?
 Si7 Ni1 C1 Rb1 176.40(8) . . . 5_666 ?
 Si7 Ni1 C1 Rb2 62.07(10) . . . . ?
 Si7 Ni1 C2 Rb1 167.28(7) . . . 5_666 ?
 Si7 Ni1 C2 Rb2 -53.38(9) . . . 5_676 ?
 Si7 Ni1 C2 Rb4 119.7(4) . . . 5_666 ?
 Si6 Ni1 C1 Rb1 63.66(12) 5_676 . . 5_666 ?
 Si6 Ni1 C1 Rb2 -50.67(10) 5_676 . . . ?
 Si6 Ni1 C2 Rb1 -77.79(5) 5_676 . . 5_666 ?
 Si6 Ni1 C2 Rb2 61.55(9) 5_676 . . 5_676 ?
 Si6 Ni1 C2 Rb4 -125.4(4) 5_676 . . 5_666 ?
 C1 Ni1 C2 Rb1 43.9(2) . . . 5_666 ?
 C1 Ni1 C2 Rb2 -176.7(2) . . . 5_676 ?
 C1 Ni1 C2 Rb4 -3.7(6) . . . 5_666 ?
 C2 Ni1 C1 Rb1 -59.9(3) . . . 5_666 ?
 C2 Ni1 C1 Rb2 -174.24(19) . . . . ?
 Rb4 Ni1 C1 Rb2 -175.436(17) 5_666 . . . ?
 Rb4 Ni1 C2 Rb2 -173.0(5) 5_666 . . 5_676 ?
 Rb4 O2 C2 Rb2 173.4(4) 5_666 . . 5_676 ?
 K4A O2 C2 Rb2 -176.4(8) 6_566 . . 5_676 ?
 K4A O2 C2 Rb2 163.1(8) 5_666 . . 5_676 ?

_shelx_SHELXL_version_number      '2014/7'
_iucr_refine_instructions_details
;

    mc_afterrev_koord.res created by SHELXL-2014/7

TITL mc in C2/c
CELL 0.71073 30.669 9.919 19.894 90 110.18 90
ZERR 4 0.0061 0.002 0.004 0 0.03 0
LATT 7
SYMM -X,+Y,0.5-Z
SFAC C H K N Ni O Rb Si
UNIT 16 192 1.1 64 8 16 30.9 72
EQIV $1 1-X,+Y,0.5-Z
SIMU 0.001 0.001 2 Rb4 K4A
 
L.S. 20 0 0
PLAN  10
CONN 1 $H
CONN 12 3.9 $Rb
BIND Rb1 Si8
BIND Rb1 Si4
FREE Rb1 N8
FREE Rb1 N2
FREE Rb1 H2c
FREE Rb1 H2b
FREE Rb1 C1
FREE Rb1 C2
BIND Rb3 Si1
BIND Rb3 Si3
FREE Rb3 H1b
FREE Rb5 H1a
FREE Rb5 H1b
BIND Si7 Rb1
FREE Rb2 H4b
FREE Rb2 H4a
FREE Rb2 H3c
BIND Si3 Rb2
BIND N4 Rb2
FREE Rb4 H3a_$1
FREE Rb4 H3a
FREE Rb4 H2a_$1
FREE Rb4 H2a
FREE Rb4 O2_$1
FREE Rb4 O2
FREE Rb4 C2_$1
FREE Rb4 C2
FREE K4A H3a
FREE K4A O2
MORE -1
CONF
BOND $H
fmap 2 53
acta
REM <olex2.extras>
REM <HklSrc "%.\\mC_abs_neu%20-%20Kopie.hkl">
REM </olex2.extras>
 
WGHT    0.032300
FVAR       0.08945   0.72528
PART 1
RB1   7    0.406053    0.501000    0.506228    11.00000    0.02476    0.02032 =
         0.02525    0.00247    0.00697   -0.00085
PART 0
RB2   7    0.507618    0.953367    0.353243    11.00000    0.01883    0.02737 =
         0.02001    0.00225    0.00620    0.00158
RB3   7    0.316994    0.952018    0.146837    11.00000    0.03138    0.03340 =
         0.03107    0.00630    0.01775    0.00461
PART 1
RB5   7    0.256558    0.731394    0.499503    10.50000    0.03477    0.03971 =
         0.04957    0.00764    0.00770   -0.01800
PART 0
NI1   5    0.499068    0.749160    0.519429    11.00000    0.01377    0.01357 =
         0.01856    0.00102    0.00563   -0.00015
SI2   8    0.356567    1.184077    0.395994    11.00000    0.01751    0.01630 =
         0.02184    0.00348    0.00555    0.00154
SI5   8    0.312417    1.023900    0.453945    11.00000    0.01417    0.02138 =
         0.02075    0.00114    0.00680    0.00030
SI4   8    0.354712    0.806145    0.410733    11.00000    0.01816    0.01519 =
         0.02362   -0.00130    0.00479   -0.00194
SI1   8    0.312939    0.988651    0.332752    11.00000    0.01703    0.02562 =
         0.01758    0.00016    0.00251    0.00063
SI7   8    0.433237    0.880947    0.479187    11.00000    0.01478    0.01491 =
         0.01826    0.00059    0.00590    0.00049
SI6   8    0.435870    1.118071    0.459420    11.00000    0.01393    0.01504 =
         0.01946    0.00052    0.00632   -0.00033
SI8   8    0.373556    0.886487    0.533874    11.00000    0.02140    0.02139 =
         0.01955    0.00476    0.01005    0.00347
SI3   8    0.395540    0.972579    0.356765    11.00000    0.01849    0.02274 =
         0.01644   -0.00080    0.00778    0.00017
SI9   8    0.381901    1.135117    0.525291    11.00000    0.01916    0.02235 =
         0.01906   -0.00417    0.00842   -0.00357
N5    4    0.301828    0.685259    0.198780    11.00000    0.03660    0.03777 =
         0.04061   -0.00302    0.01345   -0.00973
AFIX 137
H5A   2    0.272948    0.658183    0.174885    11.00000   -1.20000
H5B   2    0.306077    0.690083    0.245287    11.00000   -1.20000
H5C   2    0.321860    0.626635    0.191916    11.00000   -1.20000
AFIX   0
N2    4    0.393892    0.453483    0.153731    11.00000    0.03808    0.02819 =
         0.03286    0.00309    0.01532    0.00287
H2A   2   10.399281   10.475180   10.199281    11.00000   -1.20000
H2B   2   10.392509   10.364130   10.149030    11.00000   -1.20000
H2C   2   10.367130   10.489419   10.126301    11.00000   -1.20000
O2    6    0.501362    0.674854    0.661698    11.00000    0.04446    0.02899 =
         0.02485    0.00210    0.01355   -0.00227
N3    4    0.428581    0.771220    0.221815    11.00000    0.03088    0.02731 =
         0.02733   -0.00256    0.00919   -0.00027
H3A   2   10.426089   10.701950   10.248970    11.00000   -1.20000
H3B   2   10.404579   10.770469   10.180950    11.00000   -1.20000
H3C   2   10.428700   10.847890   10.245049    11.00000   -1.20000
N8    4    0.397206    0.503493    0.317142    11.00000    0.03786    0.03731 =
         0.03011    0.00369    0.01319   -0.00030
H8A   2   10.425700   10.487960   10.347770    11.00000   -1.20000
H8B   2   10.377320   10.447009   10.326361    11.00000   -1.20000
H8C   2   10.389050   10.587910   10.321941    11.00000   -1.20000
O1    6    0.499433    0.633749    0.385906    11.00000    0.03989    0.02719 =
         0.02838   -0.00502    0.01669   -0.00116
N7    4    0.206831    0.760731    0.328014    11.00000    0.04029    0.03638 =
         0.04440    0.00217    0.01861    0.00289
PART 2
AFIX 137
H7A   2    0.236673    0.777006    0.352308    11.00000   -1.20000
H7B   2    0.189279    0.815762    0.343246    11.00000   -1.20000
H7C   2    0.201112    0.774572    0.281552    11.00000   -1.20000
AFIX   0
PART 0
N6    4    0.220620    0.988685    0.149987    11.00000    0.02532    0.03011 =
         0.02995   -0.00261    0.00485    0.00035
AFIX 137
H6A   2    0.207859    1.061766    0.124960    11.00000   -1.20000
H6B   2    0.221896    0.998453    0.195099    11.00000   -1.20000
H6C   2    0.203514    0.916713    0.130838    11.00000   -1.20000
AFIX   0
N4    4    0.561110    1.119035    0.275338    11.00000    0.02806    0.02820 =
         0.02191   -0.00121    0.00676    0.00209
H4A   2   10.576880   11.107121   10.245709    11.00000   -1.20000
H4B   2   10.580140   11.109770   10.320331    11.00000   -1.20000
H4C   2   10.548730   11.201270   10.269120    11.00000   -1.20000
N1    4    0.303639    0.432830    0.520772    11.00000    0.02766    0.03863 =
         0.03911   -0.00516    0.01256    0.00071
H1A   2   10.286029   10.446949   10.547520    11.00000   -1.20000
H1B   2   10.286340   10.397341   10.478940    11.00000   -1.20000
H1C   2   10.326590   10.376749   10.543241    11.00000   -1.20000
C1    1    0.498398    0.669718    0.441209    11.00000    0.02095    0.01521 =
         0.02802    0.00221    0.00840   -0.00068
C2    1    0.500398    0.698416    0.604146    11.00000    0.01705    0.01430 =
         0.02551   -0.00143    0.00573   -0.00116
PART 2
RB4   7    0.500000    0.550843    0.250000    20.50000    0.03176    0.01916 =
         0.02053    0.00000    0.01423    0.00000
PART 0
PART 3
K4A   3    0.511456    0.552033    0.248495   -20.50000    0.03183    0.01964 =
         0.02111    0.00061    0.01424    0.00014
HKLF 4
 
REM  mc in C2/c
REM R1 =  0.0349 for    4898 Fo > 4sig(Fo)  and  0.0568 for all    6534 data
REM    253 parameters refined using      6 restraints
 
END  
     
WGHT      0.0323      0.0000 

REM Highest difference peak  0.902,  deepest hole -0.464,  1-sigma level  0.159
Q1    1   0.4158  0.5422  0.4826  11.00000  0.05    0.90
Q2    1   0.3871  0.4984  0.4931  11.00000  0.05    0.87
Q3    1   0.4176  0.4666  0.4845  11.00000  0.05    0.83
Q4    1   0.5037  0.4843  0.2774  11.00000  0.05    0.76
Q5    1   0.5152  0.7073  0.5007  11.00000  0.05    0.72
Q6    1   0.4844  0.9924  0.3551  11.00000  0.05    0.70
Q7    1   0.2995  1.0037  0.1637  11.00000  0.05    0.70
Q8    1   0.3143  1.0304  0.1252  11.00000  0.05    0.70
Q9    1   0.5032  0.6242  0.2767  11.00000  0.05    0.70
Q10   1   0.4922  0.5362  0.2037  11.00000  0.05    0.69

REM The information below was added by Olex2.
REM
REM R1 = 0.0349 for 4898 Fo > 4sig(Fo) and 0.0568 for all 46537 data
REM n/a parameters refined using n/a restraints
REM Highest difference peak 0.90, deepest hole -0.46
REM Mean Shift 0, Max Shift -0.001.

REM +++ Tabular Listing of Refinement Information +++
REM R1_all = 0.0568
REM R1_gt = 0.0349
REM wR_ref = 0.0711
REM GOOF = 0.954
REM Shift_max = -0.001
REM Shift_mean = 0
REM Reflections_all = 46537
REM Reflections_gt = 4898
REM Parameters = n/a
REM Hole = -0.46
REM Peak = 0.90
REM Flack = n/a

;
_olex2_submission_special_instructions 'No special instructions were received'
loop_
  _refln_index_h
  _refln_index_k
  _refln_index_l
  _refln_F_squared_meas
  _refln_F_squared_sigma
  _refln_scale_group_code
 4 0 0 450.26 51.07 0
 -4 0 0 476.46 37.23 0
 -4 0 0 430.85 49.98 0
 4 0 0 418.1 47.5 0
 -6 0 0 2131.5 46.14 0
 6 0 0 2032.97 45.45 0
 -6 0 0 2301.7 47.07 0
 6 0 0 2193.94 56.92 0
 -8 0 0 1313.54 41.23 0
 8 0 0 1311.8 33.97 0
 -8 0 0 1407.51 42.59 0
 8 0 0 1255.83 41.25 0
 10 0 0 8749.59 62.94 0
 -10 0 0 9081.68 63.22 0
 -10 0 0 9999.99 66.07 0
 10 0 0 9625.82 65.49 0
 12 0 0 3833.42 43.73 0
 -12 0 0 3879.81 43.87 0
 12 0 0 3533.32 42.43 0
 -12 0 0 3657.18 42.6 0
 -14 0 0 646.88 28.19 0
 14 0 0 633.26 28.91 0
 -14 0 0 598.82 28.43 0
 14 0 0 593.44 29.06 0
 16 0 0 4696.07 39.2 0
 -16 0 0 4893.06 39.26 0
 16 0 0 4215.56 37.93 0
 -16 0 0 4515.7 38.84 0
 -18 0 0 307.99 21.02 0
 -18 0 0 263.69 20.39 0
 18 0 0 247.26 15.48 0
 18 0 0 291.57 21 0
 -20 0 0 1435.64 24.74 0
 20 0 0 1500.75 25.52 0
 20 0 0 1397.33 24.96 0
 -20 0 0 1655.39 26.48 0
 22 0 0 1289.25 24.12 0
 22 0 0 1351.81 24.23 0
 -22 0 0 1447.56 24.88 0
 -22 0 0 1325.93 24.45 0
 -24 0 0 55.52 17.32 0
 -24 0 0 81.85 18.7 0
 24 0 0 78.2 17.8 0
 24 0 0 75.7 17.45 0
 26 0 0 163.08 16.89 0
 -26 0 0 163.8 17.36 0
 26 0 0 153.11 17.26 0
 -26 0 0 197.47 17.97 0
 -28 0 0 642.91 18.69 0
 -28 0 0 725.99 19.91 0
 28 0 0 600.56 19.05 0
 28 0 0 672.82 18.95 0
 30 0 0 70.66 15.81 0
 -30 0 0 108.64 16.43 0
 30 0 0 74.6 15.44 0
 -30 0 0 61.66 16.03 0
 -32 0 0 853.67 18.97 0
 -32 0 0 925.8 19.99 0
 32 0 0 873.5 19.47 0
 32 0 0 727.08 19.26 0
 34 0 0 109.38 15.86 0
 -34 0 0 139.79 15.19 0
 34 0 0 132.85 15.61 0
 -34 0 0 113.52 16.17 0
 -36 0 0 18.06 15 0
 -36 0 0 25.98 15.14 0
 36 0 0 21.32 14.68 0
 36 0 0 8.49 14.85 0
 -3 -1 0 1133.96 52.54 0
 3 -1 0 1174.01 67.37 0
 3 1 0 1011.58 53.34 0
 -3 1 0 1302.61 69.24 0
 -3 1 0 1060.27 66.25 0
 3 -1 0 1093.28 64.55 0
 3 1 0 1095.47 54.67 0
 -3 -1 0 1057.72 52.17 0
 -5 1 0 1286.16 54.84 0
 5 1 0 1307.02 52.66 0
 5 -1 0 1220.41 62.22 0
 -5 1 0 1486.45 65.92 0
 5 1 0 1325.34 53.37 0
 -5 -1 0 1431.85 52.01 0
 5 -1 0 1374.61 56 0
 -5 -1 0 1299.11 50.28 0
 -7 1 0 191.04 38.09 0
 -7 -1 0 157.77 37.5 0
 7 1 0 195.27 37.63 0
 7 1 0 183.16 37.52 0
 -7 -1 0 165.52 37.75 0
 7 -1 0 170.3 38.92 0
 -7 1 0 185.31 37.71 0
 7 -1 0 184.2 38.01 0
 -9 1 0 1866.83 40.34 0
 -9 -1 0 1804.01 31.46 0
 -9 1 0 1676.12 38.55 0
 9 1 0 1693.55 36.84 0
 9 -1 0 1610.54 38.11 0
 9 -1 0 1711.98 39.49 0
 9 1 0 1611.19 36.2 0
 -9 -1 0 1611.76 35.74 0
 -11 -1 0 -2 27.26 0
 -11 -1 0 14.47 26.58 0
 11 -1 0 14.63 26.68 0
 11 1 0 12.42 19.43 0
 11 -1 0 8.1 27.33 0
 11 1 0 24.34 20 0
 -11 1 0 9.37 27.07 0
 -11 1 0 15.49 27.17 0
 -13 1 0 441.53 28.08 0
 13 -1 0 398.34 27.59 0
 -13 -1 0 416.58 21.64 0
 13 -1 0 419.27 28.04 0
 -13 1 0 406.57 28.33 0
 13 1 0 428.99 30.02 0
 -13 -1 0 411.3 29.62 0
 13 1 0 370.12 21.73 0
 15 -1 0 1082.17 28.25 0
 -15 -1 0 989.12 27.78 0
 -15 1 0 999.84 27.28 0
 -15 1 0 1097.76 27.89 0
 15 1 0 1088.51 28.65 0
 15 -1 0 986.26 27.33 0
 -15 -1 0 1080.83 28.48 0
 15 1 0 953.12 27.78 0
 17 1 0 1223.91 25.43 0
 -17 1 0 1250.29 26.7 0
 -17 -1 0 1304.49 25.75 0
 17 -1 0 1217.63 26.51 0
 -17 1 0 1391.94 27.81 0
 17 1 0 1394.3 25.89 0
 17 -1 0 1293.21 22.77 0
 -17 -1 0 1408.75 26.16 0
 19 1 0 538.84 16.6 0
 19 -1 0 525.04 20.98 0
 19 1 0 494.25 21.04 0
 -19 1 0 517.16 21.17 0
 -19 1 0 570.63 22.99 0
 -19 -1 0 517.29 20.88 0
 -19 -1 0 553.94 16.83 0
 19 -1 0 479.11 20.75 0
 -21 1 0 10.73 17.68 0
 21 -1 0 11.09 17.61 0
 -21 1 0 34 17.33 0
 21 -1 0 17.32 19.11 0
 21 1 0 24.1 18.84 0
 21 1 0 13.03 18.91 0
 -21 -1 0 8.74 13.32 0
 -21 -1 0 25.37 19.75 0
 -23 -1 0 195.43 18.57 0
 23 1 0 206.11 19.34 0
 23 1 0 188.85 18.36 0
 -23 1 0 187.91 18.01 0
 -23 -1 0 219.37 14.23 0
 23 -1 0 181.91 18.53 0
 23 -1 0 221.91 18.59 0
 -23 1 0 239.04 19.82 0
 -25 -1 0 123.97 18.13 0
 25 -1 0 107.6 18.87 0
 25 1 0 125.45 17.33 0
 25 -1 0 118.24 18.13 0
 -25 1 0 106.54 18.45 0
 -25 -1 0 105.73 18.17 0
 25 1 0 134.27 17.26 0
 -25 1 0 154.79 19.02 0
 -27 -1 0 514.01 14.89 0
 -27 1 0 528.4 19.96 0
 -27 -1 0 502.42 14.22 0
 27 -1 0 535 19.09 0
 27 1 0 462.92 18.09 0
 27 1 0 492.76 18.26 0
 27 -1 0 445.72 18.94 0
 -27 1 0 582.56 20.86 0
 -29 -1 0 41.52 17.04 0
 29 1 0 36.2 15.92 0
 -29 1 0 31.95 16.5 0
 29 1 0 29.52 16.56 0
 -29 1 0 14.3 16.11 0
 29 -1 0 6.18 16.45 0
 29 -1 0 45.08 16.11 0
 -29 -1 0 20.53 11.19 0
 -31 1 0 43.35 16.54 0
 -31 -1 0 40.44 15.42 0
 31 -1 0 36.03 15.94 0
 31 1 0 25.34 15.65 0
 -31 1 0 29.22 16.5 0
 -31 -1 0 77.58 15.57 0
 31 -1 0 43.25 15.81 0
 31 1 0 15.16 14.62 0
 -33 1 0 4.19 11.04 0
 33 -1 0 2.25 15.39 0
 -33 -1 0 16.69 14.81 0
 -33 1 0 18.64 15 0
 -33 -1 0 14.46 14.62 0
 33 1 0 -1.47 14.27 0
 33 -1 0 -1.91 14.95 0
 33 1 0 14.46 10.18 0
 35 1 0 105.05 14.68 0
 -35 -1 0 119.21 15.84 0
 35 -1 0 110.52 15.5 0
 35 -1 0 84.54 15.84 0
 -35 -1 0 111.55 14.96 0
 35 1 0 101.36 15.31 0
 -35 1 0 105.4 15.16 0
 -35 1 0 118.29 16.42 0
 37 1 0 7.96 14.87 0
 -37 1 0 21.13 15.5 0
 -37 1 0 -7.55 13.06 0
 -37 -1 0 7.84 10.3 0
 37 1 0 10.19 10.11 0
 37 -1 0 15.5 14.35 0
 -37 -1 0 3.29 15.43 0
 37 -1 0 -19.78 13.68 0
 0 2 0 3318.84 80.66 0
 0 -2 0 3428.87 83.34 0
 0 -2 0 3402.28 80.07 0
 0 2 0 3431.06 81.89 0
 -2 -2 0 8.96 41.78 0
 2 -2 0 12.45 51.97 0
 2 2 0 8.47 41.9 0
 2 -2 0 11.27 52.25 0
 -2 2 0 6.48 51.19 0
 -2 2 0 11.37 58.22 0
 -2 -2 0 8.01 42.89 0
 2 2 0 5.85 42.33 0
 -4 -2 0 1174.96 45.93 0
 -4 2 0 1241.55 59.21 0
 4 -2 0 1347.29 61.04 0
 -4 -2 0 1170.39 46.14 0
 -4 2 0 1125.44 58.39 0
 4 2 0 1179.71 45.94 0
 4 -2 0 1141.36 58.02 0
 4 2 0 1109.61 45.26 0
 -6 2 0 4.2 39.74 0
 -6 -2 0 4.19 32.52 0
 6 -2 0 -0.46 40.24 0
 -6 2 0 0.55 38.84 0
 6 -2 0 4.46 31.53 0
 -6 -2 0 -2.09 31.86 0
 6 2 0 8.33 31.26 0
 6 2 0 7.34 31.41 0
 -8 -2 0 1162.1 35.06 0
 -8 2 0 1128.04 41.25 0
 -8 2 0 1349.96 38.57 0
 8 -2 0 1115.19 37.1 0
 8 -2 0 1185.37 41.32 0
 8 2 0 1138.31 34.84 0
 -8 -2 0 1242.51 35.9 0
 8 2 0 1233.62 35.68 0
 10 2 0 3814.9 42.99 0
 -10 2 0 4133.34 53.95 0
 -10 -2 0 3899.79 43.54 0
 10 -2 0 3367.67 46.7 0
 -10 2 0 3507.94 46.78 0
 -10 -2 0 3646.72 42.06 0
 10 -2 0 3737.13 48.28 0
 10 2 0 3507.94 42.15 0
 -12 2 0 62.93 32.16 0
 -12 -2 0 80.36 28.5 0
 12 -2 0 79.69 26.42 0
 -12 2 0 83.86 27.17 0
 -12 -2 0 68.26 28.36 0
 12 -2 0 81.94 32.01 0
 12 2 0 88.01 28.26 0
 12 2 0 93.34 28.98 0
 14 2 0 1469.05 30.09 0
 14 2 0 1630.82 30.95 0
 14 -2 0 1405.37 30.4 0
 -14 2 0 1652.71 35.84 0
 -14 2 0 1495.03 33.97 0
 -14 -2 0 1563.21 24.9 0
 14 -2 0 1598.58 30.86 0
 -14 -2 0 1488.6 24.96 0
 -16 -2 0 15.18 14.23 0
 -16 -2 0 3.27 14.45 0
 -16 2 0 17.92 21.1 0
 16 -2 0 21.56 20.79 0
 16 -2 0 29.04 25.22 0
 -16 2 0 8.71 20.11 0
 16 2 0 19.05 20.27 0
 16 2 0 13.88 20.69 0
 18 2 0 5.59 13.51 0
 18 -2 0 1.73 18.27 0
 -18 -2 0 -0.59 20.36 0
 -18 -2 0 -5.32 14.12 0
 -18 2 0 3.33 17.63 0
 18 2 0 3.17 19.26 0
 18 -2 0 17.6 17.92 0
 -18 2 0 14.48 20.21 0
 20 2 0 14 19.03 0
 -20 -2 0 14.37 18.68 0
 20 -2 0 23.68 17.3 0
 -20 -2 0 21.61 18.63 0
 20 2 0 8.17 18.43 0
 -20 2 0 20.98 17.22 0
 20 -2 0 33.42 17.57 0
 -20 2 0 32.8 18.38 0
 -22 -2 0 448.77 15.93 0
 -22 2 0 444.83 19.96 0
 -22 -2 0 478.7 15.92 0
 22 2 0 417.14 19.94 0
 22 2 0 470.09 20.47 0
 -22 2 0 507.14 24.05 0
 22 -2 0 476.46 19.54 0
 22 -2 0 419.12 21.11 0
 -24 -2 0 535.71 19.97 0
 24 2 0 512.43 19.11 0
 -24 -2 0 514.98 19.5 0
 24 -2 0 459.25 20.18 0
 24 -2 0 439.63 19.76 0
 -24 2 0 453.52 19.71 0
 24 2 0 430.62 18.83 0
 -24 2 0 539.53 20.96 0
 26 2 0 64.99 17 0
 -26 2 0 67.41 16.64 0
 -26 2 0 83.35 13.54 0
 26 2 0 57.15 11.57 0
 26 -2 0 65.67 17.11 0
 26 -2 0 64.3 17.57 0
 -26 -2 0 83.38 17.15 0
 -26 -2 0 70.32 16.65 0
 -28 -2 0 89.59 17.29 0
 28 -2 0 86.7 16.73 0
 -28 2 0 85.45 18.53 0
 28 2 0 65.33 17.11 0
 -28 -2 0 81.31 17.19 0
 28 2 0 92.54 16.93 0
 -28 2 0 86.12 17.49 0
 28 -2 0 70.86 17.05 0
 30 2 0 43.56 10.76 0
 -30 2 0 56.55 17.93 0
 -30 2 0 40.93 16.42 0
 30 -2 0 50.97 16.14 0
 30 -2 0 33.88 16.73 0
 30 2 0 40.55 10.8 0
 -30 -2 0 50.1 15.15 0
 -30 -2 0 67.67 15.79 0
 -32 2 0 122.16 15.69 0
 32 2 0 97.94 15.88 0
 32 -2 0 124.19 16.35 0
 -32 -2 0 155.89 16.44 0
 32 -2 0 123.72 16.81 0
 32 2 0 96.94 11.05 0
 -32 2 0 145.01 17.55 0
 -32 -2 0 143.26 15.75 0
 34 -2 0 149.1 16.11 0
 -34 2 0 180.11 16.43 0
 -34 2 0 125.37 15 0
 34 -2 0 145.49 16.22 0
 -34 -2 0 175.95 15.37 0
 -34 -2 0 146.24 15.02 0
 34 2 0 123.23 11.08 0
 34 2 0 124.77 10.96 0
 36 2 0 130.21 15.36 0
 -36 -2 0 136.09 15.26 0
 -36 2 0 206.4 17.2 0
 36 -2 0 155.96 15.42 0
 -36 -2 0 199.03 16.04 0
 36 2 0 162.49 15.35 0
 -36 2 0 151.92 15.86 0
 36 -2 0 137.56 16.21 0
 1 -3 0 210.6 35.32 0
 -1 -3 0 219.06 38.13 0
 1 3 0 221.59 30.58 0
 1 -3 0 201.77 36.87 0
 -1 3 0 208.64 36.27 0
 1 3 0 227.59 31.8 0
 -1 3 0 194.28 33.76 0
 -1 -3 0 239.36 31.57 0
 -3 3 0 204.96 38.97 0
 3 3 0 204.39 29.55 0
 -3 -3 0 221.64 30.27 0
 3 3 0 189.21 29.79 0
 -3 3 0 187.39 38.8 0
 3 -3 0 189.1 38.73 0
 -3 -3 0 200.27 35.41 0
 3 -3 0 222.15 39.97 0
 5 3 0 6938.58 60.28 0
 5 3 0 7740.35 62.75 0
 -5 -3 0 7696.52 65.82 0
 5 -3 0 6999.64 89.8 0
 5 -3 0 8706.84 103.92 0
 -5 3 0 7375.67 96.51 0
 -5 3 0 8181.54 95.37 0
 -5 -3 0 7800.41 63.99 0
 -7 3 0 252.68 32.21 0
 -7 3 0 288.29 32.77 0
 -7 -3 0 278.02 27.81 0
 7 3 0 278.63 27.95 0
 7 3 0 250.1 27.55 0
 -7 -3 0 261.4 27.71 0
 7 -3 0 254.44 31.55 0
 7 -3 0 280.81 33.54 0
 9 3 0 9.86 26.77 0
 -9 -3 0 26.61 27.23 0
 9 3 0 7.89 27.04 0
 -9 3 0 9.9 29.86 0
 9 -3 0 11.33 29.45 0
 9 -3 0 6.19 25.24 0
 -9 3 0 6.72 24.73 0
 -9 -3 0 25.29 27.06 0
 11 3 0 1162.06 24.23 0
 -11 3 0 1213.56 32.9 0
 11 -3 0 1224.69 33.5 0
 -11 3 0 1375.73 39.36 0
 -11 -3 0 1344.98 31.39 0
 -11 -3 0 1295.09 31.75 0
 11 -3 0 1144.95 33.38 0
 11 3 0 1299.56 32.23 0
 13 3 0 172.04 23.43 0
 13 -3 0 193.36 24.82 0
 13 -3 0 218.71 29.65 0
 -13 3 0 213.33 29.17 0
 13 3 0 224.04 23.98 0
 -13 -3 0 215.61 23.8 0
 -13 3 0 221.25 25.36 0
 -13 -3 0 195.93 24.14 0
 -15 3 0 80.73 21.24 0
 -15 -3 0 79.63 19.44 0
 15 -3 0 87.6 21.96 0
 -15 -3 0 68.16 20.9 0
 15 3 0 92.37 20.37 0
 15 3 0 67.91 19.2 0
 15 -3 0 72.29 21.82 0
 -15 3 0 87.51 26.97 0
 17 -3 0 860.42 29.11 0
 17 3 0 858.81 23.35 0
 -17 -3 0 808.75 18.97 0
 -17 3 0 918.6 26.55 0
 17 3 0 795.05 22.99 0
 -17 -3 0 864.91 23.91 0
 -17 3 0 820.93 27.49 0
 17 -3 0 733.1 24.76 0
 19 3 0 76.46 19.08 0
 19 3 0 53.57 13.21 0
 -19 3 0 70.32 18.62 0
 19 -3 0 62.69 18.44 0
 -19 -3 0 61.47 19.16 0
 -19 3 0 58.04 19.7 0
 19 -3 0 64.64 18.37 0
 -19 -3 0 68.78 18.8 0
 -21 -3 0 127.51 13.82 0
 -21 3 0 115.98 19.61 0
 21 -3 0 108.36 18.77 0
 -21 -3 0 116.23 19.1 0
 21 3 0 110.96 18.98 0
 21 -3 0 103.03 19 0
 -21 3 0 109.12 18.08 0
 21 3 0 115.98 18.92 0
 23 3 0 7.1 12.58 0
 23 -3 0 15.94 16.96 0
 -23 3 0 -3.78 16.99 0
 23 3 0 -14.12 18.08 0
 23 -3 0 17.07 17.25 0
 -23 -3 0 12.35 17.87 0
 -23 -3 0 -3.22 18.13 0
 -23 3 0 8.7 17.98 0
 25 -3 0 60.92 17.76 0
 -25 3 0 65.46 17.27 0
 25 3 0 57.25 12.61 0
 25 3 0 81.72 17.03 0
 -25 -3 0 62.72 17.71 0
 25 -3 0 66.06 17.72 0
 -25 3 0 56.91 17.88 0
 -25 -3 0 72.42 17.9 0
 27 -3 0 216.45 16.98 0
 27 -3 0 196.35 17.05 0
 27 3 0 194.84 17.59 0
 -27 -3 0 197.91 18.92 0
 -27 -3 0 245.82 18.28 0
 27 3 0 207.61 14.06 0
 -27 3 0 210.06 16.96 0
 -27 3 0 233.7 18.5 0
 29 3 0 -10.85 14.89 0
 -29 -3 0 5.27 15.69 0
 29 -3 0 10.62 16 0
 29 -3 0 -2.86 15.44 0
 -29 3 0 2.4 16.2 0
 -29 3 0 16.46 16.1 0
 29 3 0 5.41 15.74 0
 -29 -3 0 5.79 15.53 0
 31 3 0 27.2 15.51 0
 31 3 0 33.68 15.3 0
 -31 -3 0 29.96 11.91 0
 -31 3 0 24.77 16.41 0
 -31 3 0 44.6 15.33 0
 31 -3 0 26.4 15.94 0
 31 -3 0 5.14 16.44 0
 -31 -3 0 35.45 15.44 0
 33 -3 0 10.94 10.82 0
 -33 3 0 7.41 15.39 0
 -33 -3 0 25.07 14.34 0
 -33 -3 0 25.81 15.14 0
 33 3 0 21.6 14.42 0
 33 3 0 20 14.34 0
 33 -3 0 17.01 14.63 0
 -33 3 0 8.93 16 0
 -35 -3 0 75.61 11.39 0
 35 -3 0 78.76 15.25 0
 35 3 0 57.75 15.16 0
 35 -3 0 58.14 16.27 0
 35 3 0 57.25 15.11 0
 -35 3 0 78.96 17.02 0
 -35 -3 0 77.56 15.73 0
 -35 3 0 83.03 15 0
 0 4 0 3193.44 56.53 0
 0 -4 0 3139.15 53.93 0
 0 4 0 2859.47 51.58 0
 0 -4 0 3222.47 56.27 0
 -2 -4 0 28.28 25.06 0
 -2 -4 0 43.67 25.2 0
 2 4 0 41.98 29.18 0
 -2 4 0 30.15 33.75 0
 -2 4 0 31.44 37.18 0
 2 4 0 31.54 23.15 0
 2 -4 0 33.1 34.66 0
 2 -4 0 38.48 32.85 0
 4 4 0 421.42 33.12 0
 4 -4 0 426.71 43.31 0
 -4 4 0 420.04 43.14 0
 -4 -4 0 469.19 34.11 0
 4 -4 0 482.83 48.41 0
 4 4 0 471.2 29.36 0
 -4 -4 0 465.34 34.29 0
 -6 -4 0 112.8 33.55 0
 6 4 0 126.38 32.76 0
 6 -4 0 132.94 45.64 0
 6 -4 0 114.55 36.26 0
 -6 4 0 114.86 39.44 0
 6 4 0 136.4 32.29 0
 -6 -4 0 118.35 26.94 0
 -6 4 0 129.61 37.32 0
 -8 4 0 187.86 34.12 0
 8 4 0 177.83 24.88 0
 -8 -4 0 188.63 24.91 0
 -8 -4 0 215.02 25.51 0
 8 -4 0 217.87 41.04 0
 8 4 0 215.81 25.13 0
 -8 4 0 219.63 33.86 0
 8 -4 0 185.05 31.84 0
 -10 4 0 2652.28 50.95 0
 10 4 0 2478.16 33.53 0
 -10 -4 0 2499.11 33.42 0
 10 -4 0 2454.87 49.95 0
 10 4 0 2295.38 32.17 0
 -10 4 0 2304.97 46.17 0
 -10 -4 0 2351.08 32.69 0
 10 -4 0 2280.31 48.95 0
 12 4 0 1384.84 27.52 0
 12 4 0 1527.79 28.14 0
 -12 -4 0 1400.21 23.4 0
 -12 4 0 1614.37 38.72 0
 -12 4 0 1430.85 33.54 0
 -12 -4 0 1599.54 28.59 0
 12 -4 0 1545.31 37.66 0
 12 -4 0 1426.65 37.33 0
 -14 4 0 255.36 28.05 0
 14 4 0 240.37 21.51 0
 -14 4 0 229.45 26.59 0
 14 4 0 232.49 21.21 0
 14 -4 0 203.89 25.76 0
 -14 -4 0 244.44 22.03 0
 14 -4 0 245.75 26.99 0
 -14 -4 0 226.98 20.86 0
 -16 -4 0 39.3 19.62 0
 16 4 0 37.63 13.14 0
 16 4 0 55.59 19.13 0
 -16 4 0 50.08 25.66 0
 -16 4 0 42.18 20.18 0
 16 -4 0 35.17 23.61 0
 16 -4 0 37.17 20.1 0
 -16 -4 0 29.64 13.88 0
 -18 4 0 39.17 19.76 0
 18 4 0 30.85 18.76 0
 18 -4 0 24.94 18.86 0
 18 -4 0 20.94 18.28 0
 -18 -4 0 22.79 13.28 0
 18 4 0 25.06 18.68 0
 -18 -4 0 28.05 18.96 0
 -18 4 0 26.82 22.58 0
 20 4 0 939.16 22.17 0
 -20 -4 0 1076.87 23.02 0
 20 -4 0 988.77 24.89 0
 20 -4 0 889.54 27.48 0
 -20 4 0 917.29 23.18 0
 -20 -4 0 948.76 22.15 0
 20 4 0 990.68 22.66 0
 -20 4 0 1085.14 26.24 0
 22 4 0 1074.55 21.29 0
 22 -4 0 1045.52 26.62 0
 22 4 0 983.59 21.26 0
 -22 -4 0 1022.95 20.98 0
 -22 4 0 1006.14 23.19 0
 -22 4 0 1196.89 25.15 0
 -22 -4 0 1147.51 21.84 0
 22 -4 0 953.61 23.44 0
 -24 -4 0 0.22 17.1 0
 -24 -4 0 -5.82 17.83 0
 24 -4 0 -1.3 19.54 0
 -24 4 0 8.53 16.91 0
 24 4 0 3.08 16.88 0
 24 4 0 1.71 17.91 0
 -24 4 0 4.02 16.6 0
 24 -4 0 0.44 16.32 0
 -26 4 0 2.31 16.72 0
 26 -4 0 -2.63 19.66 0
 26 4 0 -7.31 16.86 0
 -26 -4 0 -6.34 16.95 0
 26 -4 0 7.34 16.41 0
 -26 -4 0 26.85 17.02 0
 -26 4 0 2.95 15.85 0
 26 4 0 -6.19 16.85 0
 28 4 0 83.06 15.94 0
 28 -4 0 118.69 16.61 0
 28 4 0 96.43 15.9 0
 -28 4 0 95.96 16.11 0
 28 -4 0 80.01 15.86 0
 -28 -4 0 105.04 15.73 0
 -28 -4 0 108.48 15.97 0
 -28 4 0 113.89 17.13 0
 -30 4 0 2.37 16.17 0
 30 -4 0 3.33 15.08 0
 -30 4 0 -4.31 15.11 0
 30 -4 0 -8.69 15.64 0
 30 4 0 12.39 15.09 0
 30 4 0 -4.22 15.82 0
 -30 -4 0 13.33 16.46 0
 -30 -4 0 18.67 15.56 0
 32 4 0 82.33 11.38 0
 -32 -4 0 83.7 15.55 0
 32 4 0 75.19 11.1 0
 -32 4 0 113.32 16.75 0
 32 -4 0 96.42 16.33 0
 -32 4 0 90.24 14.6 0
 -32 -4 0 105.31 15.75 0
 32 -4 0 79.06 19.54 0
 34 -4 0 1.32 14.68 0
 34 4 0 4.12 14.7 0
 -34 4 0 7.07 15.5 0
 34 -4 0 15.5 15.15 0
 -34 4 0 1.7 14.33 0
 34 4 0 13.13 15.02 0
 -34 -4 0 0.99 15.15 0
 -34 -4 0 26.24 15.39 0
 -1 -5 0 439.14 29.25 0
 1 5 0 430.71 32.98 0
 1 -5 0 458.19 35.21 0
 1 -5 0 442.47 32.52 0
 -1 5 0 409.61 31.06 0
 -1 5 0 451.82 35.2 0
 -1 -5 0 447.91 31.82 0
 1 5 0 436.53 31.08 0
 3 5 0 201.55 24.22 0
 -3 5 0 183.61 36.74 0
 -3 -5 0 182.65 29.8 0
 -3 -5 0 181.45 25.11 0
 -3 5 0 175.54 32.88 0
 3 -5 0 201.42 38.41 0
 3 -5 0 178.6 36.08 0
 3 5 0 188.58 29.63 0
 5 -5 0 658.58 45.89 0
 5 -5 0 739.24 45.31 0
 -5 -5 0 632.16 27.08 0
 5 5 0 665.36 26.52 0
 5 5 0 641.72 27.12 0
 -5 5 0 642.85 43.11 0
 -5 -5 0 702.27 28.24 0
 -5 5 0 679.99 44.59 0
 7 -5 0 491.82 39.63 0
 7 -5 0 574.79 44.3 0
 -7 5 0 550.63 39.46 0
 -7 -5 0 549.6 25.67 0
 7 5 0 505.84 24.27 0
 -7 5 0 496.62 41.51 0
 7 5 0 537.93 23.78 0
 -7 -5 0 517.86 29.79 0
 9 5 0 282.92 21.61 0
 -9 -5 0 286.59 21.78 0
 9 -5 0 313.26 34.45 0
 9 5 0 316.06 21.11 0
 -9 5 0 276.64 29.65 0
 -9 5 0 313.85 32.48 0
 9 -5 0 279.6 31.55 0
 -9 -5 0 314.99 22 0
 -11 5 0 29.09 25.14 0
 -11 -5 0 35.27 19.11 0
 11 -5 0 33.59 29.52 0
 11 -5 0 15.82 23.78 0
 -11 5 0 31.97 25.53 0
 11 5 0 35.14 19.12 0
 -11 -5 0 8.85 18.86 0
 11 5 0 28.42 18.64 0
 13 5 0 83.84 18.62 0
 -13 -5 0 83.44 19.37 0
 -13 -5 0 88.48 17.52 0
 -13 5 0 88.11 25.19 0
 13 -5 0 76.01 24.5 0
 13 -5 0 89.17 26.18 0
 13 5 0 76.8 12.33 0
 -13 5 0 84.64 25.34 0
 -15 5 0 29.2 23.52 0
 -15 -5 0 40.74 19.11 0
 15 -5 0 26.75 24.23 0
 15 5 0 20.65 19.21 0
 -15 5 0 33.05 23.61 0
 -15 -5 0 23.15 13.03 0
 15 5 0 34.37 19.24 0
 15 -5 0 24.62 23.72 0
 -17 -5 0 75.95 18.62 0
 -17 -5 0 91.13 18.96 0
 17 5 0 71.28 13.26 0
 -17 5 0 61.71 22.84 0
 17 5 0 62.32 19.19 0
 -17 5 0 71.37 24.01 0
 17 -5 0 47.03 18.95 0
 17 -5 0 59.26 19.2 0
 -19 5 0 44.86 23.46 0
 -19 -5 0 36.47 18.07 0
 19 -5 0 36.33 22.71 0
 19 -5 0 37.32 22.19 0
 19 5 0 29.98 17.87 0
 -19 5 0 22.33 22.39 0
 19 5 0 53.8 12.5 0
 -19 -5 0 26.47 17.64 0
 -21 -5 0 67.08 16.98 0
 -21 5 0 64.77 17.92 0
 21 5 0 43.89 17.47 0
 -21 5 0 60.95 18.28 0
 21 5 0 56.05 17.11 0
 21 -5 0 52.69 17.22 0
 21 -5 0 52.6 17.05 0
 -21 -5 0 64.18 17.35 0
 23 5 0 33.51 17.86 0
 -23 -5 0 34.04 16.55 0
 -23 5 0 28 17.16 0
 23 5 0 36.74 16.9 0
 23 -5 0 19.76 16.79 0
 23 -5 0 32.93 18.4 0
 -23 -5 0 42.65 16.81 0
 -23 5 0 33.05 22.07 0
 -25 -5 0 30.82 11.63 0
 -25 5 0 44.49 21.19 0
 25 -5 0 21.22 20.79 0
 25 -5 0 40.19 17.32 0
 25 5 0 17 15.74 0
 25 5 0 22.97 15.73 0
 -25 5 0 20.22 16.47 0
 -25 -5 0 27.1 12.24 0
 -27 5 0 363.54 18.5 0
 -27 5 0 371.84 23.48 0
 27 -5 0 359.34 18.46 0
 -27 -5 0 411.36 17.67 0
 -27 -5 0 335.91 12.97 0
 27 5 0 352.78 16.55 0
 27 5 0 307.09 16.6 0
 27 -5 0 296.56 22.04 0
 -29 -5 0 11.05 16.34 0
 29 5 0 14.79 15.48 0
 -29 5 0 23.79 15.66 0
 29 5 0 19.66 15.24 0
 29 -5 0 19.28 15.76 0
 29 -5 0 14.88 15.71 0
 -29 5 0 15.06 16.48 0
 -29 -5 0 22.09 11.62 0
 31 -5 0 200.62 16.58 0
 -31 5 0 193.58 17.33 0
 -31 -5 0 194.9 15.95 0
 -31 5 0 232.66 18.19 0
 31 5 0 170.51 15.46 0
 -31 -5 0 232 16.46 0
 31 -5 0 171.24 16.67 0
 31 5 0 211.99 15.21 0
 -33 5 0 114.64 16.49 0
 -33 -5 0 99.23 11.32 0
 33 -5 0 92.32 15.27 0
 33 -5 0 80.31 15.62 0
 -33 5 0 78.95 19.13 0
 33 5 0 87.78 15.13 0
 -33 -5 0 88.66 15.87 0
 33 5 0 73.43 15.32 0
 0 -6 0 84.45 23.91 0
 0 6 0 83.27 23.88 0
 0 6 0 82.63 25.62 0
 0 -6 0 80.07 30.07 0
 -2 -6 0 56.19 24.31 0
 -2 -6 0 54.07 26.03 0
 -2 6 0 50.39 25.86 0
 2 6 0 44.96 25.41 0
 -2 6 0 52.88 28.95 0
 2 6 0 50.75 23.91 0
 2 -6 0 57.16 27.46 0
 2 -6 0 55.02 29.98 0
 4 6 0 1276.23 32.05 0
 -4 -6 0 1165.35 27.93 0
 -4 6 0 1133.55 43.26 0
 4 -6 0 1166 46.63 0
 -4 6 0 1214.6 45.82 0
 -4 -6 0 1175.27 28.64 0
 4 6 0 1154.03 28.82 0
 4 -6 0 1280 44.75 0
 6 -6 0 210.21 37.07 0
 6 -6 0 176.48 36.88 0
 -6 6 0 189.4 36.4 0
 6 6 0 185.05 21.76 0
 -6 6 0 173.8 38.07 0
 6 6 0 187.54 21.08 0
 -6 -6 0 178.33 21.6 0
 -6 -6 0 185.55 21.96 0
 -8 6 0 82.72 34.21 0
 -8 -6 0 91.56 19.47 0
 8 6 0 98.87 19.19 0
 -8 -6 0 98.34 19.88 0
 8 -6 0 90.47 33.78 0
 8 6 0 91.94 19.56 0
 8 -6 0 98.1 35.63 0
 10 6 0 60 18.63 0
 10 -6 0 46.94 30.67 0
 -10 -6 0 63.32 16.7 0
 10 6 0 50.9 16.82 0
 -10 -6 0 53.27 17.47 0
 10 -6 0 59.55 30.65 0
 -10 6 0 50.47 32.13 0
 -10 6 0 51.43 30.8 0
 -12 -6 0 26.58 16.65 0
 -12 6 0 36.59 30.83 0
 -12 -6 0 31.78 17.95 0
 12 -6 0 38.9 27.52 0
 12 -6 0 31.12 25.54 0
 12 6 0 32.57 12.93 0
 -12 6 0 35.77 26.54 0
 12 6 0 53.94 17.1 0
 14 6 0 188.29 18.18 0
 -14 -6 0 200.18 18.73 0
 14 6 0 200.73 18.98 0
 14 -6 0 196.7 27.55 0
 -14 6 0 216.41 24.26 0
 -14 -6 0 194.67 18.86 0
 14 -6 0 166.44 26.66 0
 -14 6 0 180.66 26.63 0
 16 -6 0 641.58 27.83 0
 -16 6 0 650.67 27.38 0
 -16 6 0 797.64 32.41 0
 16 6 0 679.09 21.27 0
 -16 -6 0 761.4 22.2 0
 16 6 0 674.97 17.08 0
 -16 -6 0 686.15 21.87 0
 16 -6 0 707.91 28.64 0
 -18 -6 0 191.47 19.19 0
 18 6 0 169.98 18.49 0
 18 -6 0 170.94 24.66 0
 -18 6 0 185.8 25.04 0
 -18 -6 0 166.6 18.93 0
 18 6 0 156.11 18.13 0
 18 -6 0 159.19 23.35 0
 -18 6 0 158.65 23.43 0
 -20 -6 0 -11.05 16.48 0
 20 -6 0 -0.3 22.63 0
 20 -6 0 10.16 22.05 0
 -20 6 0 14.36 17.78 0
 -20 -6 0 1.38 16.4 0
 -20 6 0 13.51 19.78 0
 20 6 0 8.28 11.58 0
 20 6 0 14.13 11.88 0
 22 -6 0 79.84 21.92 0
 22 6 0 78.06 17 0
 -22 6 0 92.3 22.93 0
 -22 -6 0 85.75 16.59 0
 -22 -6 0 79.97 16.73 0
 22 6 0 63 15.78 0
 -22 6 0 80.68 21.77 0
 22 -6 0 90.87 23 0
 24 6 0 287.44 17.48 0
 -24 6 0 335.55 20.27 0
 24 -6 0 248.75 19.57 0
 -24 -6 0 307.82 18.38 0
 24 6 0 274.54 17.6 0
 24 -6 0 303.7 23.11 0
 -24 -6 0 280.08 17.65 0
 -24 6 0 293.58 19.58 0
 26 6 0 57.09 15.94 0
 -26 6 0 63.05 20.74 0
 26 -6 0 68.33 20.05 0
 26 6 0 68.54 15.3 0
 26 -6 0 70.69 20.37 0
 -26 -6 0 66.08 14.25 0
 -26 6 0 69.48 16.7 0
 -26 -6 0 71.8 15.23 0
 28 6 0 50.9 15.41 0
 28 -6 0 42.76 20.25 0
 -28 -6 0 48.43 15.7 0
 -28 -6 0 69.49 11.84 0
 28 -6 0 55.97 16.65 0
 -28 6 0 66.94 20.86 0
 -28 6 0 42.9 16.89 0
 28 6 0 60.07 14.96 0
 30 -6 0 48.12 16.76 0
 -30 -6 0 46.99 14.87 0
 30 6 0 37.45 14.66 0
 -30 6 0 38.96 18.49 0
 -30 6 0 47.09 20.19 0
 -30 -6 0 55.82 15.07 0
 30 -6 0 20.31 15.94 0
 30 6 0 45.77 14.33 0
 -32 -6 0 11.65 14.97 0
 32 6 0 9.41 13.95 0
 -32 6 0 5.29 19.35 0
 32 6 0 -5.28 14.68 0
 -32 6 0 3.81 17.91 0
 32 -6 0 -7.91 18.43 0
 -32 -6 0 8.16 10.7 0
 32 -6 0 -10.17 14.8 0
 1 -7 0 59.51 28.92 0
 1 7 0 55.6 23.05 0
 -1 7 0 59.82 26.59 0
 1 -7 0 49.15 23.11 0
 1 7 0 53.01 25.3 0
 -1 -7 0 51.66 23.08 0
 -1 -7 0 60.44 25 0
 -1 7 0 47.42 24.68 0
 3 -7 0 -2.19 25.35 0
 -3 -7 0 -3.78 24.32 0
 3 -7 0 -1.91 31.28 0
 3 7 0 11.69 23.53 0
 -3 7 0 3.49 27.55 0
 -3 7 0 4.02 30.35 0
 3 7 0 2.83 22.2 0
 -3 -7 0 -5.27 21.61 0
 -5 -7 0 35.32 19.07 0
 5 -7 0 33.26 36.28 0
 -5 -7 0 29.98 20 0
 5 -7 0 38.83 35.06 0
 -5 7 0 37.29 31.1 0
 5 7 0 44.45 22.61 0
 -5 7 0 34.88 34.26 0
 5 7 0 40.99 19.92 0
 7 7 0 13.87 18.35 0
 -7 -7 0 17.66 18.64 0
 -7 -7 0 19.08 17.74 0
 7 7 0 13.42 18.72 0
 9 7 0 24.12 17.79 0
 9 7 0 25.91 17.84 0
 -9 -7 0 33.3 22.52 0
 -9 -7 0 27.98 21.67 0
 11 7 0 184.07 19.66 0
 -11 7 0 163.17 39.33 0
 11 7 0 194.69 18.08 0
 11 -7 0 209.03 40.2 0
 -11 -7 0 182.19 18.73 0
 -11 -7 0 187.03 19.9 0
 11 -7 0 175.62 42.45 0
 13 -7 0 93.59 32.88 0
 -13 7 0 84.97 32.46 0
 -13 -7 0 91.16 19.34 0
 13 -7 0 102.88 33.38 0
 13 7 0 96.05 18.41 0
 -13 -7 0 100.13 18.64 0
 13 7 0 97.64 18.39 0
 -13 7 0 108.31 31.84 0
 15 -7 0 99.58 28.72 0
 15 7 0 118.37 18.39 0
 -15 7 0 117.03 26.25 0
 15 -7 0 113 30.54 0
 -15 -7 0 106.6 18.38 0
 -15 7 0 108.96 29.17 0
 15 7 0 115.29 18.24 0
 -15 -7 0 89.54 17.97 0
 -17 -7 0 277.42 18.52 0
 -17 7 0 275.89 28.23 0
 -17 7 0 247.73 27.48 0
 17 -7 0 269.78 27.85 0
 17 7 0 273.62 18.71 0
 17 7 0 281.24 19.05 0
 -17 -7 0 264.63 17.95 0
 17 -7 0 226.69 27.19 0
 -19 -7 0 28.11 16.59 0
 -19 7 0 19.67 24.98 0
 -19 -7 0 21.55 11.88 0
 -19 7 0 20.53 21 0
 19 7 0 12.08 17.79 0
 19 -7 0 17.46 24.75 0
 19 -7 0 26.89 24.92 0
 19 7 0 26.65 17.65 0
 -21 7 0 154.24 23.36 0
 21 -7 0 118.87 24.39 0
 21 7 0 135.94 16.46 0
 -21 -7 0 150.93 16.52 0
 21 -7 0 148.05 22.08 0
 -21 7 0 135.88 22.31 0
 21 7 0 139.7 16.91 0
 -21 -7 0 139.02 16.27 0
 23 -7 0 140.54 21.68 0
 23 -7 0 116.87 20.87 0
 -23 7 0 157.94 21.98 0
 23 7 0 139.36 16.51 0
 23 7 0 127.64 16.18 0
 -23 -7 0 148.07 12.78 0
 -23 7 0 149.24 20.74 0
 -23 -7 0 144.03 16.1 0
 -25 -7 0 93.7 15.44 0
 25 7 0 102.76 14.65 0
 -25 -7 0 104.51 16.27 0
 25 -7 0 89.72 21.27 0
 25 -7 0 111.25 20.82 0
 -25 7 0 96.18 20.3 0
 25 7 0 111.23 11.49 0
 -25 7 0 105.65 21.75 0
 27 -7 0 3.7 20.21 0
 27 7 0 7.88 15.09 0
 -27 -7 0 10.4 15.12 0
 27 7 0 5.81 10.93 0
 -27 -7 0 2.46 15.36 0
 -27 7 0 -1.27 20.37 0
 27 -7 0 11.1 19.46 0
 -27 7 0 1.48 19.27 0
 -29 -7 0 0.8 14.7 0
 -29 -7 0 12.4 14.82 0
 29 -7 0 6.64 19.27 0
 -29 7 0 6.61 20.04 0
 -29 7 0 6.31 18.31 0
 29 -7 0 5.79 19.21 0
 29 7 0 24.33 14.38 0
 29 7 0 10.46 14.26 0
 31 -7 0 8.06 19.05 0
 31 7 0 13.82 14.72 0
 31 7 0 11.32 13.84 0
 -31 -7 0 5.69 14.61 0
 -31 7 0 -6.32 15.53 0
 -31 7 0 8.27 20.41 0
 -31 -7 0 -3.35 9.82 0
 31 -7 0 2.31 18.99 0
 0 -8 0 291.54 28.66 0
 0 8 0 286.5 25.11 0
 0 -8 0 281.72 23.53 0
 0 8 0 285.74 25.91 0
 -2 -8 0 86.05 23.26 0
 2 8 0 80.83 21.75 0
 -2 8 0 81.67 26.33 0
 2 8 0 90.04 23.12 0
 -2 -8 0 81.67 21.37 0
 2 -8 0 87.63 27.21 0
 2 -8 0 76.68 27.7 0
 -2 8 0 81.84 23.59 0
 4 -8 0 84.69 34.88 0
 -4 -8 0 75.25 23.51 0
 4 8 0 69.05 23.02 0
 -4 8 0 73.4 31.08 0
 4 -8 0 67.69 37.17 0
 -4 8 0 75 33.55 0
 -4 -8 0 72.06 22.83 0
 4 8 0 77.21 24.4 0
 -6 -8 0 1122.9 26.24 0
 6 8 0 1092.9 28.97 0
 6 8 0 1118.27 24.89 0
 8 8 0 3.83 18.24 0
 -8 -8 0 23.52 21.54 0
 8 8 0 5.29 17.91 0
 -8 -8 0 10.5 20.7 0
 -10 -8 0 50.02 17.57 0
 -10 -8 0 44.1 16.83 0
 10 8 0 43.4 17.33 0
 10 8 0 71.14 17.49 0
 -12 -8 0 8.12 17.77 0
 12 8 0 15.39 17.25 0
 -12 -8 0 19.21 16.76 0
 12 8 0 20.18 17.52 0
 14 8 0 34.39 17.73 0
 -14 -8 0 31.02 16.92 0
 14 8 0 31.58 17.33 0
 -14 -8 0 21.68 17.64 0
 16 8 0 21.65 17.33 0
 16 8 0 19.42 16.99 0
 16 -8 0 12.17 35.77 0
 16 -8 0 15.37 37.53 0
 -16 8 0 13.13 33.24 0
 -16 -8 0 2.06 17.55 0
 -16 -8 0 21.32 16.76 0
 -16 8 0 13.96 35.07 0
 18 -8 0 30.21 28.5 0
 -18 -8 0 40.72 17.58 0
 -18 -8 0 35.48 16.15 0
 -18 8 0 26.31 25.7 0
 18 8 0 22.16 16.95 0
 18 8 0 23.6 16.08 0
 18 -8 0 27.46 28.71 0
 -18 8 0 36.95 28.39 0
 20 8 0 1.74 17.03 0
 20 -8 0 3.07 25.73 0
 20 -8 0 5.67 26.24 0
 20 8 0 15.69 16.58 0
 -20 8 0 5.19 22.55 0
 -20 -8 0 24.04 15.82 0
 -20 -8 0 0.62 17.4 0
 -20 8 0 7.11 26.47 0
 -22 8 0 28.1 22.55 0
 -22 8 0 30.87 23.55 0
 -22 -8 0 35.86 16.59 0
 22 -8 0 26.22 23.6 0
 22 8 0 42.84 16.23 0
 22 -8 0 22.93 26.31 0
 -22 -8 0 37.1 16.37 0
 22 8 0 26.51 16.71 0
 24 8 0 24.88 15.06 0
 -24 8 0 28.75 19.18 0
 -24 8 0 24.14 23.6 0
 -24 -8 0 29.56 16.33 0
 24 -8 0 34.52 22.79 0
 24 -8 0 15.17 22.54 0
 24 8 0 22.16 15.48 0
 -24 -8 0 39.63 15.69 0
 26 8 0 25.79 14.94 0
 26 8 0 38.91 15.08 0
 26 -8 0 31.1 19.82 0
 -26 -8 0 38.38 10.92 0
 -26 8 0 29.36 21.03 0
 -26 8 0 49.74 24.43 0
 26 -8 0 43.64 23.64 0
 -26 -8 0 46.25 15.11 0
 -28 -8 0 32.86 15.36 0
 28 -8 0 32.76 22.65 0
 -28 8 0 28.53 20.73 0
 -28 -8 0 35.12 15.31 0
 28 8 0 21.31 15.01 0
 -28 8 0 24.15 17.93 0
 28 -8 0 21.35 22.93 0
 28 8 0 27.94 14.87 0
 1 9 0 24.88 24.57 0
 1 -9 0 14.17 24.02 0
 1 -9 0 21.39 30.68 0
 -1 -9 0 17.77 21.42 0
 -1 9 0 16.47 23.41 0
 1 9 0 20.08 22.94 0
 -1 9 0 25.16 25.6 0
 -1 -9 0 18.8 27.17 0
 3 -9 0 31.82 32.35 0
 -3 -9 0 31.37 21.47 0
 -3 9 0 22.74 29.61 0
 -3 9 0 29.8 31.21 0
 3 9 0 47.87 21.73 0
 3 9 0 38.28 23.48 0
 3 -9 0 29.66 34.69 0
 -3 -9 0 27.34 24 0
 5 9 0 9.34 22.66 0
 -5 -9 0 6.1 23.63 0
 5 9 0 15.91 21.83 0
 -5 -9 0 4.27 21.46 0
 -7 -9 0 10.31 15.7 0
 -7 -9 0 8.23 16.83 0
 7 9 0 9.21 22.37 0
 7 9 0 22.93 21.41 0
 -9 -9 0 90.67 16.61 0
 9 9 0 99.02 21.18 0
 -9 -9 0 104.21 18.03 0
 9 9 0 100.21 17.23 0
 -11 -9 0 181.95 18.32 0
 11 9 0 194.33 18.07 0
 11 9 0 196.51 17.65 0
 -11 -9 0 175.93 16.81 0
 -13 -9 0 23.19 16.62 0
 -13 -9 0 41.64 20.61 0
 13 9 0 8.98 16.19 0
 13 9 0 5.56 17.6 0
 15 9 0 278.54 17.9 0
 -15 -9 0 300.29 17.82 0
 15 9 0 301.13 20.82 0
 -15 -9 0 276 17.4 0
 17 9 0 89.05 16.54 0
 -17 -9 0 92.4 16.62 0
 17 9 0 63.62 16 0
 -17 -9 0 98.97 15.81 0
 -19 -9 0 -2.86 15.11 0
 19 9 0 14.55 15.31 0
 19 9 0 10.72 15.51 0
 -19 -9 0 13.37 15.84 0
 -21 -9 0 294.97 17.75 0
 21 9 0 245.88 16.68 0
 21 9 0 257.5 16.75 0
 -21 -9 0 238.41 16.83 0
 23 9 0 52.77 15.6 0
 23 -9 0 45.19 37.46 0
 -23 -9 0 46.12 15.57 0
 -23 9 0 15.45 28.17 0
 23 9 0 40.16 16.05 0
 -23 9 0 44.93 32.1 0
 23 -9 0 50.85 35.64 0
 -23 -9 0 69.28 11.51 0
 25 9 0 36.45 14.74 0
 25 -9 0 16.05 27.7 0
 -25 -9 0 4.07 14.71 0
 25 -9 0 20.34 30.07 0
 25 9 0 12.72 15.53 0
 -25 -9 0 26.51 15.71 0
 -25 9 0 5.65 22.32 0
 -25 9 0 18.77 26.18 0
 0 10 0 61.63 21.77 0
 0 -10 0 67.87 23.08 0
 0 10 0 65.57 23.29 0
 0 -10 0 72.5 27.2 0
 2 -10 0 117.36 34.45 0
 -2 -10 0 105.31 22.91 0
 -2 10 0 113.38 32.19 0
 -2 10 0 95.7 28.52 0
 2 10 0 111.71 23.39 0
 2 -10 0 104.84 34.02 0
 2 10 0 122.18 24.55 0
 -2 -10 0 106.1 21.65 0
 4 10 0 774.63 27 0
 -4 -10 0 787.61 27.66 0
 -4 -10 0 773.14 25.78 0
 4 10 0 788.05 26.16 0
 -6 -10 0 667.02 23.53 0
 6 10 0 666.51 21.67 0
 6 10 0 698.59 25.52 0
 -6 -10 0 685.73 22.35 0
 8 10 0 178.33 17.77 0
 -8 -10 0 188 20.72 0
 -8 -10 0 183.67 18.27 0
 8 10 0 183.71 22.54 0
 10 10 0 266.97 20.4 0
 -10 -10 0 246.66 21.06 0
 -10 -10 0 246.43 17.26 0
 10 10 0 256.77 17.94 0
 -12 -10 0 181.43 17.64 0
 12 10 0 184.1 17.31 0
 12 10 0 163.9 17.95 0
 -14 -10 0 33.98 16.46 0
 14 10 0 27.22 16.49 0
 14 10 0 20.33 15.95 0
 -14 -10 0 27.42 15.33 0
 -16 -10 0 510.31 18.36 0
 16 10 0 526.79 18.43 0
 -16 -10 0 572.72 19.61 0
 16 10 0 514.75 19.56 0
 18 10 0 240.15 17.81 0
 18 10 0 239.69 16.48 0
 -18 -10 0 219.06 16.73 0
 -18 -10 0 251.28 17.94 0
 20 10 0 14.33 16.41 0
 -20 -10 0 9.28 16.07 0
 -20 -10 0 14.39 16.52 0
 20 10 0 28.18 18.82 0
 -22 -10 0 17.08 15.4 0
 22 10 0 24.33 15.72 0
 -22 -10 0 48.3 19.56 0
 22 10 0 23.79 15.56 0
 1 -11 0 208.72 38.63 0
 1 11 0 184.14 25.3 0
 -1 -11 0 197.16 26.46 0
 -1 11 0 169.91 33.84 0
 -1 11 0 190.59 34.77 0
 1 -11 0 173.51 38.16 0
 1 11 0 157.63 21.9 0
 -1 -11 0 189.48 29.04 0
 3 11 0 3.32 22.06 0
 -3 -11 0 1.57 24.5 0
 -3 -11 0 3.09 19.47 0
 3 11 0 0.81 23.95 0
 5 11 0 15.25 20.67 0
 -5 -11 0 19.05 18.79 0
 5 11 0 17.57 19.68 0
 -5 -11 0 18.33 20.48 0
 7 11 0 50.54 20.43 0
 -7 -11 0 52.87 21.18 0
 -7 -11 0 46.73 19.04 0
 7 11 0 61.47 19.74 0
 9 11 0 25.8 19.14 0
 -9 -11 0 35.54 16.67 0
 -9 -11 0 42.34 20.79 0
 9 11 0 46.35 20.94 0
 11 11 0 294.29 19.59 0
 -11 -11 0 281.26 18.39 0
 11 11 0 313.2 22.5 0
 -11 -11 0 300.68 23.49 0
 13 11 0 6.91 15.39 0
 -13 -11 0 8.57 15.75 0
 13 11 0 5.31 17.06 0
 -13 -11 0 5.6 16.1 0
 15 11 0 17.46 16.01 0
 -15 -11 0 -2.06 19.8 0
 15 11 0 -4 15.4 0
 -17 -11 0 26 16.34 0
 17 11 0 27.69 15.23 0
 -17 -11 0 37.46 15.36 0
 17 11 0 13.91 15.4 0
 19 11 0 -2.18 14.84 0
 19 11 0 -7.91 14.15 0
 -19 -11 0 4.07 15.29 0
 2 12 0 1.49 24.49 0
 2 12 0 6.16 21.9 0
 -2 -12 0 3.48 26.43 0
 -2 -12 0 8.92 25.7 0
 4 12 0 0.07 20.14 0
 -4 -12 0 -2.94 21.64 0
 -4 -12 0 -3.87 23.89 0
 4 12 0 9.15 22.17 0
 6 12 0 33.83 20.29 0
 -6 -12 0 40.25 19.45 0
 6 12 0 38.41 19.31 0
 -6 -12 0 36.57 20.86 0
 -8 -12 0 20.65 20.67 0
 8 12 0 17.86 20.39 0
 -8 -12 0 9.74 18.47 0
 8 12 0 11.88 15.71 0
 -10 -12 0 22.8 18.54 0
 10 12 0 44.03 18.88 0
 10 12 0 29.63 20.29 0
 -10 -12 0 31.36 17.11 0
 12 12 0 16.47 18.92 0
 -12 -12 0 21.87 15.75 0
 12 12 0 24.65 16.41 0
 -12 -12 0 6.16 20.2 0
 -37 1 1 5.83 15.33 0
 -37 1 1 -5.81 13.87 0
 37 1 -1 9.24 14.59 0
 37 -1 -1 20.65 14.1 0
 -37 -1 1 3.94 14.63 0
 37 -1 -1 -1.81 14.2 0
 37 1 -1 3 14.02 0
 -37 -1 1 6 15.4 0
 -35 1 1 13.47 15.41 0
 35 1 -1 29.85 14.81 0
 35 -1 -1 14.79 14.99 0
 -35 -1 1 5.88 10.31 0
 -35 -1 1 -0.55 14.34 0
 35 1 -1 16.14 14.53 0
 35 -1 -1 -3.01 14.95 0
 -35 1 1 0.68 14.81 0
 -33 1 1 26.25 16.13 0
 33 -1 -1 -1.02 14.97 0
 -33 -1 1 2.3 14.18 0
 -33 1 1 2.42 15.55 0
 33 1 -1 15.3 10.44 0
 33 -1 -1 27.11 15.75 0
 -33 -1 1 25.01 15.82 0
 33 1 -1 -10.54 14.35 0
 31 -1 -1 -8.34 16.51 0
 -31 1 1 8.71 17.34 0
 31 1 -1 -1.38 15.16 0
 -31 -1 1 8.45 15.18 0
 31 1 -1 7.92 15.04 0
 31 -1 -1 5.72 16.27 0
 -31 1 1 22.9 16.07 0
 -31 -1 1 8.45 15.85 0
 -29 1 1 17.04 16.04 0
 29 1 -1 17.92 15.94 0
 -29 1 1 4.42 17.63 0
 -29 -1 1 9.87 16.12 0
 29 1 -1 -4.41 15.8 0
 -29 -1 1 -13.6 15.65 0
 29 -1 -1 -12.87 17 0
 29 -1 -1 1.46 17.18 0
 -27 -1 1 52.84 12.06 0
 -27 1 1 62.35 17.97 0
 -27 1 1 65.36 18.47 0
 27 -1 -1 54.38 17.37 0
 27 1 -1 76.22 16.69 0
 27 -1 -1 61.03 16.6 0
 -27 -1 1 55.51 12.66 0
 27 1 -1 69.01 16.93 0
 -25 1 1 32.78 18.35 0
 25 1 -1 11.27 12.17 0
 25 -1 -1 21.91 13.18 0
 -25 -1 1 1.55 17.23 0
 -25 -1 1 18.11 17.61 0
 25 -1 -1 14.63 13.13 0
 25 1 -1 14.36 17.34 0
 -25 1 1 32.56 18.97 0
 -23 1 1 17.72 12.81 0
 23 -1 -1 28.79 17.71 0
 23 1 -1 9.06 17.61 0
 23 -1 -1 8.23 12.87 0
 23 1 -1 12.55 17.95 0
 -23 -1 1 23.8 18 0
 -23 -1 1 8.74 18.19 0
 -23 1 1 24.73 18.37 0
 21 -1 -1 -1.56 18.27 0
 -21 -1 1 19.27 19.04 0
 21 -1 -1 4.91 18.15 0
 -21 1 1 2.97 17.11 0
 -21 1 1 8.45 18.3 0
 -21 -1 1 36.68 18.26 0
 21 1 -1 9.85 18.3 0
 21 1 -1 14.78 18.54 0
 19 1 -1 13.07 19.84 0
 19 -1 -1 8.67 18.54 0
 -19 -1 1 33.22 13.79 0
 -19 -1 1 19.72 19.62 0
 19 -1 -1 26.54 19.67 0
 19 1 -1 19.8 14.51 0
 -19 1 1 25.77 18.28 0
 -19 1 1 12.83 18.77 0
 17 -1 -1 5.97 20.95 0
 -17 1 1 11.05 20.54 0
 17 1 -1 9.84 14.97 0
 17 1 -1 -10.38 20.3 0
 -17 -1 1 10.28 15.2 0
 -17 1 1 6.42 21.31 0
 -17 -1 1 -1.34 14.48 0
 17 -1 -1 2.71 20.97 0
 -15 -1 1 -8.5 24.65 0
 15 1 -1 -9.56 24.49 0
 -15 1 1 1.34 22.81 0
 -15 -1 1 -6.41 24.64 0
 15 1 -1 -5.21 24.62 0
 -15 1 1 -13.7 22.29 0
 15 -1 -1 16.25 23.15 0
 15 -1 -1 -4.29 23.02 0
 -13 -1 1 16.76 29 0
 -13 -1 1 12.78 28.65 0
 13 -1 -1 23.9 26.79 0
 13 1 -1 79.47 27.88 0
 13 1 -1 41.58 19.96 0
 -13 1 1 19.68 27.27 0
 -13 1 1 19.08 26.54 0
 13 -1 -1 21.3 26.7 0
 -11 -1 1 653.58 31.45 0
 11 -1 -1 637.27 31.12 0
 11 1 -1 629.87 30.33 0
 11 1 -1 709.45 31.62 0
 11 -1 -1 677.04 31.41 0
 -11 -1 1 709.3 24.8 0
 -11 1 1 640.86 30.9 0
 -11 1 1 703.64 31.93 0
 -9 1 1 290.84 31.54 0
 -9 -1 1 288.38 30.75 0
 9 1 -1 234.26 29.76 0
 9 -1 -1 240.78 37.35 0
 9 -1 -1 263.24 37.66 0
 9 1 -1 265.36 22.14 0
 -9 1 1 251.55 30.83 0
 -9 -1 1 285.63 22.59 0
 7 -1 -1 378.5 40.62 0
 -7 -1 1 360.56 39.36 0
 -7 1 1 344.68 40.23 0
 7 1 -1 342.6 40.09 0
 -7 -1 1 335.43 40.54 0
 7 1 -1 316.29 40.12 0
 -7 1 1 374.66 41.91 0
 7 -1 -1 334.95 50.27 0
 5 -1 -1 28 52.72 0
 5 1 -1 27.73 43.69 0
 -5 1 1 29.7 40.88 0
 5 1 -1 31.79 32.99 0
 -5 -1 1 33.22 30.37 0
 -5 -1 1 12.82 45.3 0
 -5 1 1 44.13 54.57 0
 5 -1 -1 23.75 41.38 0
 -3 1 1 76.93 61.14 0
 -3 -1 1 71.84 45.31 0
 -3 -1 1 71.93 41.81 0
 3 1 -1 76.88 44.66 0
 3 -1 -1 71.47 49.88 0
 3 1 -1 64.35 45.94 0
 3 -1 -1 65.31 56.9 0
 -3 1 1 68.74 62.15 0
 1 1 -1 2.22 38.78 0
 -1 -1 1 9.48 35.84 0
 -1 1 -1 311.05 44.44 0
 1 1 1 296.88 47.06 0
 1 -1 1 327.12 43.82 0
 1 -1 1 285.77 40.08 0
 -1 -1 -1 295.52 46.93 0
 1 1 1 308.23 48.86 0
 -1 -1 -1 312.67 45.75 0
 -1 1 -1 311.32 43.09 0
 -3 1 -1 171.55 44.09 0
 -3 -1 -1 157.74 45.86 0
 -3 -1 -1 179.34 46.14 0
 3 1 1 170.42 32.61 0
 3 -1 1 196.02 44.85 0
 -3 1 -1 196.83 45.12 0
 3 1 1 174.14 48.2 0
 3 -1 1 174.69 42.22 0
 -5 -1 -1 446.72 44.53 0
 -5 1 -1 524.08 58.51 0
 5 -1 1 462.58 47 0
 -5 -1 -1 414.14 34.14 0
 -5 1 -1 424.53 44.38 0
 5 1 1 422.95 45.07 0
 5 1 1 449.47 47.01 0
 5 -1 1 423.34 44.35 0
 7 -1 1 243.54 34.16 0
 7 1 1 253.02 34.36 0
 -7 1 -1 268.93 35.93 0
 -7 -1 -1 209.22 34.21 0
 7 1 1 224.81 34.42 0
 7 -1 1 250.73 43.39 0
 -7 1 -1 221.67 42.38 0
 -7 -1 -1 196.56 34.32 0
 9 -1 1 224.41 30.22 0
 9 1 1 191.07 28.3 0
 -9 1 -1 229.65 29.32 0
 -9 1 -1 225.43 30.78 0
 9 1 1 211.6 28.79 0
 9 -1 1 205.5 29.49 0
 -9 -1 -1 208.04 28.69 0
 -9 -1 -1 191.05 28.33 0
 11 1 1 2.88 28.11 0
 -11 1 -1 1.74 26.76 0
 -11 -1 -1 -0.22 28.1 0
 11 -1 1 -9.82 27.24 0
 11 1 1 0.9 27.46 0
 11 -1 1 -0.52 26.45 0
 -11 1 -1 -9.52 27.61 0
 -11 -1 -1 -7.63 19.66 0
 -13 1 -1 15.02 25.71 0
 -13 -1 -1 19.96 27.63 0
 13 -1 1 32.62 25.76 0
 13 1 1 3.14 19.41 0
 13 -1 1 17.75 25.46 0
 -13 1 -1 16.05 25.48 0
 13 1 1 7.3 28.12 0
 -13 -1 -1 12.01 27.33 0
 -15 1 -1 25.71 22.13 0
 15 1 1 -4.42 23.63 0
 -15 -1 -1 -4.51 23.06 0
 15 1 1 5.74 22.48 0
 -15 1 -1 -4.64 21.42 0
 15 -1 1 -1.1 22.04 0
 -15 -1 -1 15.12 15.84 0
 15 -1 1 -2.93 21.75 0
 17 -1 1 31.46 19.69 0
 -17 1 -1 54.47 20.48 0
 17 1 1 62.81 19.33 0
 -17 -1 -1 45.19 19.88 0
 17 1 1 43.87 19.3 0
 -17 1 -1 33.03 19.69 0
 17 -1 1 26.94 20.18 0
 -17 -1 -1 32.48 19.55 0
 -19 -1 -1 80.26 18.74 0
 19 -1 1 69.11 19.78 0
 19 -1 1 93.99 19.21 0
 19 1 1 86.06 18.94 0
 -19 -1 -1 91.58 19.49 0
 19 1 1 85.46 18.68 0
 -19 1 -1 89.66 18.51 0
 -19 1 -1 105.19 20.49 0
 -21 1 -1 31.84 13.07 0
 -21 1 -1 30.31 17.66 0
 -21 -1 -1 32.02 18.95 0
 21 -1 1 39.55 13.34 0
 -21 -1 -1 31.07 19.61 0
 21 1 1 45.04 18.49 0
 21 1 1 30.37 13.74 0
 21 -1 1 41.99 17.43 0
 -23 -1 -1 15.03 17.23 0
 23 -1 1 34.7 12.34 0
 23 1 1 31.65 17.19 0
 -23 -1 -1 42 18.48 0
 -23 1 -1 15.79 12.64 0
 -23 1 -1 38.04 19.49 0
 23 1 1 32.93 17.84 0
 23 -1 1 38.16 17.87 0
 -25 1 -1 49.54 18.41 0
 25 1 1 12.76 16.55 0
 25 -1 1 31.17 17.22 0
 -25 -1 -1 35.46 17.2 0
 25 -1 1 24.84 17.62 0
 25 1 1 27.39 16.85 0
 -25 -1 -1 37.85 16.77 0
 -25 1 -1 36.69 16.66 0
 27 -1 1 3.14 16.42 0
 -27 1 -1 4.48 15.69 0
 -27 -1 -1 17.66 16.9 0
 -27 1 -1 23.33 17.1 0
 -27 -1 -1 11.25 16.87 0
 27 1 1 6.15 16.74 0
 27 -1 1 5.71 15.27 0
 27 1 1 6.45 17.19 0
 -29 1 -1 12.16 15.52 0
 29 1 1 37.01 15.64 0
 29 1 1 15.09 16.65 0
 29 -1 1 -10.23 16.67 0
 -29 -1 -1 -1.09 15.89 0
 -29 -1 -1 19.61 11.53 0
 -29 1 -1 16.86 17.53 0
 29 -1 1 1.47 15.72 0
 31 1 1 -2.32 15.05 0
 31 1 1 3.11 14.56 0
 31 -1 1 -15.87 15.8 0
 -31 1 -1 16.36 15.05 0
 31 -1 1 13.05 15.1 0
 -31 -1 -1 12.44 15.25 0
 -31 1 -1 25.5 15.43 0
 -31 -1 -1 -0.83 10.57 0
 -33 -1 -1 9.28 14.76 0
 33 -1 1 20.19 15.3 0
 -33 1 -1 8.7 15.67 0
 33 1 1 22.59 15.19 0
 33 -1 1 15.69 15.09 0
 -33 -1 -1 16.3 14.63 0
 -33 1 -1 22 15.73 0
 33 1 1 5.47 14.49 0
 35 1 1 19.01 14.56 0
 35 1 1 22.48 14.86 0
 35 -1 1 9.6 14.88 0
 -35 -1 -1 12.16 14.06 0
 -35 1 -1 0.7 14.58 0
 35 -1 1 9.13 14.85 0
 -35 -1 -1 -1.45 14.98 0
 -35 1 -1 12.45 15.34 0
 36 2 -1 4.98 14.38 0
 -36 2 1 12.77 14.62 0
 36 -2 -1 -1.27 15.44 0
 36 -2 -1 -0.94 15.08 0
 -36 -2 1 -6.05 16.06 0
 36 2 -1 -3.91 10.45 0
 -36 2 1 3.17 20.06 0
 -36 -2 1 -3.07 11.01 0
 34 -2 -1 20.37 15.1 0
 -34 2 1 -5.74 14.2 0
 34 -2 -1 5.91 14.11 0
 34 2 -1 5.46 9.92 0
 34 2 -1 4.22 10.31 0
 -34 2 1 -6.22 14.92 0
 -34 -2 1 19.7 14.36 0
 -34 -2 1 12.59 15.37 0
 32 2 -1 29.56 14.69 0
 -32 -2 1 34.21 15.29 0
 32 2 -1 28.73 14.77 0
 -32 2 1 27.29 15.16 0
 -32 -2 1 48.79 15.55 0
 32 -2 -1 22.32 15.47 0
 32 -2 -1 47.67 16.3 0
 -32 2 1 12.15 16.87 0
 30 -2 -1 7.02 12.04 0
 30 -2 -1 -5.5 15.9 0
 30 2 -1 7.7 15.71 0
 -30 2 1 11.28 16.91 0
 -30 -2 1 11.64 16.15 0
 30 2 -1 -4.69 15.91 0
 -30 -2 1 2.49 16.06 0
 -30 2 1 -8.97 15.84 0
 -28 2 1 137 17.76 0
 -28 -2 1 127.9 16.85 0
 -28 -2 1 126.16 12.72 0
 28 2 -1 128.55 17.61 0
 -28 2 1 134.19 18.33 0
 28 -2 -1 124.08 17.57 0
 28 -2 -1 110.26 17.94 0
 28 2 -1 102.1 16.9 0
 -26 -2 1 9.41 17.97 0
 -26 -2 1 4.17 16.99 0
 -26 2 1 4.96 16.62 0
 26 2 -1 2.03 12.33 0
 26 -2 -1 11.69 17.34 0
 -26 2 1 4.62 18.01 0
 26 2 -1 10.76 17.09 0
 26 -2 -1 -2.54 17.56 0
 24 2 -1 15.48 17.51 0
 24 -2 -1 24.27 18.36 0
 -24 -2 1 17.92 18.28 0
 24 2 -1 2.6 11.82 0
 -24 2 1 10.22 18.15 0
 -24 -2 1 4.99 12.32 0
 -24 2 1 23.99 19.33 0
 24 -2 -1 17.85 17.54 0
 -22 -2 1 135.37 19.13 0
 22 -2 -1 132.2 18.13 0
 -22 2 1 142.85 18.26 0
 22 -2 -1 133.49 18.2 0
 22 2 -1 133.2 18.93 0
 -22 -2 1 183.8 19.66 0
 -22 2 1 163.87 19.69 0
 22 2 -1 139.85 19.29 0
 20 -2 -1 9.61 16.82 0
 -20 2 1 3.46 17.67 0
 20 2 -1 3.28 12.95 0
 20 -2 -1 1.12 17.97 0
 -20 2 1 13.78 17.74 0
 -20 -2 1 -19.59 19.6 0
 -20 -2 1 -1.56 19.63 0
 20 2 -1 -8.33 19.39 0
 -18 2 1 116.77 20.37 0
 18 -2 -1 100.74 18.77 0
 18 -2 -1 136.67 23.69 0
 -18 2 1 129.7 23.59 0
 -18 -2 1 122.93 14.47 0
 18 2 -1 125.94 19.78 0
 18 2 -1 159.48 20.07 0
 -18 -2 1 128.6 20.51 0
 -16 2 1 43 25.55 0
 16 -2 -1 15.25 21.46 0
 -16 2 1 19.62 22.1 0
 16 2 -1 10.74 20.86 0
 -16 -2 1 40.15 21.7 0
 16 2 -1 60.67 21.12 0
 16 -2 -1 18.63 22.13 0
 -16 -2 1 17.38 21.27 0
 -14 -2 1 36.17 25.6 0
 14 2 -1 31.05 25.14 0
 14 -2 -1 26.33 23.58 0
 14 2 -1 31.35 25.57 0
 14 -2 -1 24.7 28.48 0
 -14 2 1 34.44 26.93 0
 -14 -2 1 12.25 25.34 0
 -14 2 1 27.36 23.36 0
 12 2 -1 322.63 29.83 0
 -12 -2 1 359.67 29.83 0
 12 2 -1 334.25 29.77 0
 -12 2 1 299.66 27.58 0
 -12 2 1 355.76 29.76 0
 -12 -2 1 340.76 30.25 0
 12 -2 -1 308.53 28.56 0
 12 -2 -1 318.98 28.44 0
 10 2 -1 127.99 20.24 0
 -10 -2 1 126 19.83 0
 10 -2 -1 148.22 27.01 0
 -10 2 1 130.06 26.29 0
 -10 2 1 149.33 28.65 0
 10 -2 -1 131.85 26.7 0
 -10 -2 1 143.23 28.6 0
 10 2 -1 160.67 28.36 0
 8 2 -1 17.1 21.33 0
 -8 2 1 29.61 27.28 0
 8 -2 -1 31.83 33.99 0
 -8 2 1 30.19 28.32 0
 -8 -2 1 23.51 20.32 0
 8 -2 -1 24.14 28.11 0
 -8 -2 1 29.25 29.13 0
 8 2 -1 13.16 19.51 0
 -6 -2 1 159.8 32.89 0
 6 -2 -1 188.67 42.05 0
 -6 2 1 219.29 44.55 0
 -6 -2 1 175.25 34.19 0
 6 2 -1 173.93 33.09 0
 -6 2 1 174.89 39.83 0
 6 -2 -1 170.74 41.86 0
 6 2 -1 180.21 33.72 0
 4 -2 -1 4.98 64.94 0
 -4 -2 1 9.35 39.71 0
 4 2 -1 15.08 40.63 0
 -4 -2 1 12.56 41.11 0
 -4 2 1 8.17 61.47 0
 4 2 -1 22.57 41.25 0
 -4 2 1 7.09 65.17 0
 4 -2 -1 6.29 66.47 0
 2 2 -1 6.95 50.24 0
 2 2 -1 11.41 42.12 0
 -2 -2 1 12.04 40.99 0
 -2 -2 1 12.1 41.5 0
 0 2 -1 123.75 38.86 0
 0 -2 -1 136.59 53.74 0
 0 -2 1 133.13 48.59 0
 0 -2 -1 123.58 51.05 0
 0 2 1 135.4 51.49 0
 0 -2 1 130.89 39.82 0
 0 2 -1 132.65 49.25 0
 0 2 1 126.8 51.18 0
 -2 -2 -1 53.77 41.96 0
 2 2 1 72.37 51.85 0
 2 -2 1 73.37 44.59 0
 -2 2 -1 72.39 46.33 0
 2 2 1 62.6 42.11 0
 -2 2 -1 56.41 36.92 0
 2 -2 1 62.29 46.88 0
 -2 -2 -1 57.26 42.58 0
 4 -2 1 7.17 36.81 0
 4 2 1 -7.64 37.63 0
 4 -2 1 -0.21 42.36 0
 -4 -2 -1 4.61 37.87 0
 -4 -2 -1 0.21 27.12 0
 -4 2 -1 6.92 35.28 0
 4 2 1 14.85 37.48 0
 -4 2 -1 4.79 44.12 0
 -6 2 -1 25.08 34.69 0
 -6 2 -1 28.1 29.8 0
 6 -2 1 35.1 28.53 0
 6 2 1 16.33 30.47 0
 6 2 1 19.17 23.21 0
 -6 -2 -1 16.33 29.9 0
 6 -2 1 31.71 36.64 0
 -6 -2 -1 31.18 30.92 0
 8 -2 1 7.44 33.05 0
 8 2 1 22.56 28.99 0
 8 -2 1 2.55 27.73 0
 -8 2 -1 -7.43 33.64 0
 -8 -2 -1 5.19 27.85 0
 -8 2 -1 11.07 25.92 0
 -8 -2 -1 4.78 28.45 0
 8 2 1 -3.78 28.59 0
 10 -2 1 164.09 27.51 0
 10 -2 1 179.34 28.09 0
 -10 2 -1 166.23 27.74 0
 10 2 1 168.43 29.22 0
 -10 -2 -1 173.6 28.89 0
 -10 -2 -1 158.56 21.62 0
 -10 2 -1 169.74 28.63 0
 10 2 1 151.39 20.28 0
 -12 2 -1 23.68 25.34 0
 12 -2 1 -3.74 25.61 0
 12 2 1 15.97 18.93 0
 12 2 1 15.15 27.67 0
 12 -2 1 16.64 25.28 0
 -12 -2 -1 16.86 27.43 0
 -12 -2 -1 15.63 27.42 0
 -12 2 -1 5.48 25.67 0
 14 -2 1 139.86 22.09 0
 -14 2 -1 157.85 22.93 0
 -14 -2 -1 145.44 23.32 0
 -14 2 -1 132.98 21.95 0
 -14 -2 -1 129.71 16.7 0
 14 2 1 139.01 17.24 0
 14 2 1 122.4 16.99 0
 14 -2 1 137.57 22.61 0
 16 -2 1 57.07 23.65 0
 -16 2 -1 73.53 20.51 0
 -16 2 -1 73.08 23.87 0
 16 2 1 74.25 19.96 0
 -16 -2 -1 63.04 19.82 0
 16 2 1 62.3 19.44 0
 16 -2 1 61.6 19.72 0
 -16 -2 -1 69.12 19.79 0
 -18 2 -1 43.5 18.49 0
 18 2 1 53.2 19.53 0
 18 -2 1 51.58 18.49 0
 18 2 1 41.64 19.74 0
 18 -2 1 38.18 13.07 0
 -18 -2 -1 54.25 19.08 0
 -18 -2 -1 52.48 19.75 0
 -18 2 -1 42.43 18.56 0
 20 -2 1 16.69 17.46 0
 20 -2 1 6.73 17.63 0
 -20 -2 -1 24.8 19.15 0
 -20 2 -1 16.69 17.41 0
 20 2 1 9.44 18.52 0
 -20 2 -1 21.39 18.07 0
 20 2 1 26.7 19.07 0
 -20 -2 -1 12.76 18.37 0
 22 -2 1 5.21 18.14 0
 -22 2 -1 18.69 18.48 0
 22 2 1 12.44 17.9 0
 -22 -2 -1 -20.53 18.58 0
 22 2 1 -1.01 17.97 0
 -22 -2 -1 18.92 17.47 0
 22 -2 1 13.79 17.53 0
 -22 2 -1 15.86 17.58 0
 24 2 1 40.42 16.76 0
 24 -2 1 36.77 17.87 0
 -24 2 -1 31.21 17.76 0
 24 2 1 29.79 16.41 0
 -24 -2 -1 27.27 17.75 0
 -24 2 -1 53.16 18.95 0
 24 -2 1 40.4 18.16 0
 -24 -2 -1 44.89 16.41 0
 -26 2 -1 6.96 16.55 0
 -26 -2 -1 19.28 16.58 0
 -26 -2 -1 8.45 17.19 0
 26 2 1 7.78 17.29 0
 26 -2 1 15.9 17.46 0
 26 -2 1 4.7 17.4 0
 26 2 1 -4.76 17.2 0
 -26 2 -1 23.31 17.81 0
 28 2 1 25.68 16.51 0
 28 2 1 11.56 17.07 0
 -28 -2 -1 13.89 16.39 0
 -28 2 -1 0.34 16.02 0
 -28 -2 -1 35.92 17 0
 -28 2 -1 27.18 17.44 0
 28 -2 1 13.01 16.29 0
 28 -2 1 6.16 16.03 0
 -30 -2 -1 95.61 16.03 0
 30 -2 1 59.38 16.66 0
 30 2 1 73.46 15.25 0
 30 2 1 52.4 15.29 0
 30 -2 1 92.71 16.24 0
 -30 -2 -1 60.78 11.19 0
 -30 2 -1 78.59 12.01 0
 -30 2 -1 58.71 16.23 0
 -32 2 -1 10.91 15.91 0
 32 -2 1 15.35 15.07 0
 32 2 1 11.57 15.15 0
 -32 -2 -1 21.17 14.85 0
 32 -2 1 -1.81 15.21 0
 -32 -2 -1 21.03 11.21 0
 32 2 1 18.1 10.75 0
 -32 2 -1 19.46 15.18 0
 -34 2 -1 33.59 15.9 0
 34 2 1 15.44 10.29 0
 -34 2 -1 17.27 14.76 0
 34 -2 1 30.89 15.32 0
 -34 -2 -1 28.98 14.59 0
 -34 -2 -1 34.93 14.1 0
 34 2 1 16.52 14.76 0
 34 -2 1 13.24 15.5 0
 36 -2 1 46.46 16.26 0
 -36 -2 -1 56.59 15.47 0
 36 2 1 36.65 14.72 0
 -36 -2 -1 23.83 14.56 0
 -36 2 -1 56.26 15.41 0
 36 2 1 44.63 14.79 0
 36 -2 1 37.07 15.74 0
 -36 2 -1 37.78 15.58 0
 35 -3 -1 21.05 15.38 0
 -35 3 1 37.31 15.96 0
 -35 -3 1 34.3 15.57 0
 35 -3 -1 17.31 14.79 0
 -35 -3 1 2.35 15.36 0
 -35 3 1 25.76 15.46 0
 35 3 -1 17.53 10.66 0
 35 3 -1 19.04 10.06 0
 -33 -3 1 77.43 15.8 0
 -33 -3 1 32.75 15.28 0
 -33 3 1 62.79 16.69 0
 33 3 -1 54.96 15.12 0
 33 -3 -1 56.83 15.77 0
 33 -3 -1 54.08 16.13 0
 -33 3 1 61.88 15.83 0
 33 3 -1 66.66 15.04 0
 31 3 -1 22.77 15.54 0
 -31 -3 1 4.69 15.69 0
 31 3 -1 7.41 15.21 0
 -31 -3 1 9.73 15.51 0
 31 -3 -1 18.54 18.45 0
 -31 3 1 11.62 14.7 0
 31 -3 -1 16.03 16.26 0
 -31 3 1 6.96 16.67 0
 29 -3 -1 204.56 16.38 0
 29 3 -1 218.03 12.18 0
 -29 -3 1 247.66 17.52 0
 29 -3 -1 236.51 17.03 0
 29 3 -1 186.07 16.7 0
 -29 3 1 246.6 18.09 0
 -29 3 1 226.83 16.44 0
 -29 -3 1 201.97 17 0
 27 3 -1 215.36 17.33 0
 27 -3 -1 198.47 18.09 0
 -27 3 1 262.41 18.87 0
 27 -3 -1 213.14 16.84 0
 -27 3 1 229.58 17.77 0
 27 3 -1 198.98 17.58 0
 -27 -3 1 242.48 13.86 0
 -27 -3 1 221.37 17.59 0
 25 3 -1 15.08 12.33 0
 -25 -3 1 24.49 17.11 0
 -25 3 1 43.59 18.07 0
 25 3 -1 28.44 17.13 0
 25 -3 -1 25.04 17.38 0
 -25 3 1 40.29 17.38 0
 -25 -3 1 22.5 17.14 0
 25 -3 -1 27.01 17.31 0
 23 -3 -1 346.46 19.52 0
 -23 -3 1 360.64 18.9 0
 23 3 -1 346.05 18.75 0
 23 -3 -1 305.24 19.27 0
 23 3 -1 307.5 15.22 0
 -23 -3 1 352.75 19.37 0
 -23 3 1 315.81 19.24 0
 -23 3 1 370.37 20.28 0
 21 3 -1 541.54 21.2 0
 -21 3 1 493.02 20.62 0
 21 -3 -1 447.64 20.27 0
 -21 3 1 586.67 21.68 0
 21 3 -1 484.32 16.03 0
 -21 -3 1 532.09 21.02 0
 -21 -3 1 507.23 20.67 0
 21 -3 -1 504.04 20.36 0
 -19 -3 1 40.29 13.08 0
 -19 3 1 53.12 19.72 0
 19 -3 -1 42.36 22.52 0
 19 3 -1 46.16 18.73 0
 19 -3 -1 37.98 18.78 0
 -19 -3 1 57.17 19.07 0
 19 3 -1 62.58 13.44 0
 -19 3 1 32.98 18.56 0
 17 3 -1 926.08 23.09 0
 -17 3 1 1067.28 27.98 0
 17 -3 -1 965.63 26.3 0
 -17 -3 1 904 18.86 0
 17 -3 -1 874.3 26.19 0
 -17 -3 1 1025.74 24.46 0
 -17 3 1 937.19 26.27 0
 17 3 -1 997.76 23.98 0
 15 3 -1 8.41 14.56 0
 -15 3 1 14.56 22.45 0
 15 -3 -1 8.8 21.19 0
 15 3 -1 5.47 19.72 0
 -15 -3 1 -13.53 20.15 0
 15 -3 -1 20.29 22.42 0
 -15 -3 1 5.27 20.03 0
 -15 3 1 6.13 21.77 0
 13 -3 -1 425.82 32.24 0
 -13 -3 1 408.67 18.31 0
 -13 3 1 393.42 31.24 0
 -13 -3 1 423.4 19.19 0
 -13 3 1 461.35 33.4 0
 13 3 -1 391.7 19.39 0
 13 3 -1 395.37 25 0
 13 -3 -1 361.2 26.4 0
 11 3 -1 940.84 30.79 0
 -11 3 1 1123.47 39.78 0
 11 3 -1 1076.1 31.84 0
 -11 -3 1 1085.37 31.46 0
 11 -3 -1 948.16 37.81 0
 -11 -3 1 1006.2 30.51 0
 -11 3 1 955.05 36.98 0
 11 -3 -1 1012.52 37.89 0
 9 3 -1 423.34 27.8 0
 -9 3 1 385.27 30.59 0
 9 -3 -1 392.41 35.8 0
 -9 -3 1 467.5 29.01 0
 -9 -3 1 434.44 28.75 0
 9 3 -1 453.68 28.97 0
 9 -3 -1 459.74 36.25 0
 -9 3 1 498.94 38.48 0
 -7 3 1 1311.6 49.65 0
 -7 3 1 1599.23 54.81 0
 -7 -3 1 1577.07 35.04 0
 -7 -3 1 1473.27 35 0
 7 -3 -1 1346.77 49.16 0
 7 3 -1 1502.75 34.21 0
 7 -3 -1 1460.26 50.75 0
 7 3 -1 1364.31 33.55 0
 5 -3 -1 2864.14 100.55 0
 5 -3 -1 2334.05 89.71 0
 -5 -3 1 2766.05 43.63 0
 5 3 -1 2872.23 44 0
 5 3 -1 2680.64 43.87 0
 -5 3 1 2400.18 96.48 0
 -5 -3 1 2789.46 43.36 0
 -5 3 1 2897.26 91.75 0
 -3 -3 1 170.39 28.4 0
 3 3 -1 163.62 29.4 0
 -3 -3 1 155.72 28.88 0
 3 3 -1 166.31 28.88 0
 -1 -3 1 2608.11 47.45 0
 1 -3 -1 2673.9 72.65 0
 -1 -3 1 2765.71 53.8 0
 1 -3 -1 2607.99 68.16 0
 1 3 -1 2581.59 47.54 0
 1 3 -1 2540.95 48.86 0
 -1 3 1 2547.2 68.04 0
 -1 3 1 2478.54 69.14 0
 1 -3 1 -2.13 31.73 0
 -1 -3 -1 4.98 35.86 0
 -1 3 -1 -1.48 30.83 0
 1 -3 1 3.07 26.77 0
 -1 -3 -1 -3.98 28.4 0
 1 3 1 -2.14 34.98 0
 -1 3 -1 -2.34 26.95 0
 1 3 1 -9.99 33.7 0
 -3 3 -1 999.85 41.13 0
 -3 3 -1 1118.04 42.29 0
 3 3 1 1150.73 36.55 0
 3 3 1 1044.37 36.26 0
 3 -3 1 1154.31 43.13 0
 -3 -3 -1 1082.22 36.66 0
 -3 -3 -1 1114.42 36.19 0
 3 -3 1 1009.31 41.4 0
 -5 3 -1 1232.85 41.23 0
 -5 -3 -1 1184.57 35.28 0
 -5 -3 -1 1083.67 33.95 0
 5 -3 1 1112.56 39.58 0
 5 -3 1 1269.94 42.27 0
 5 3 1 1104.7 34.77 0
 -5 3 -1 1090.63 40.12 0
 5 3 1 1243.72 40.37 0
 -7 3 -1 99.37 29.02 0
 7 3 1 94.44 19.07 0
 7 3 1 97.32 27.29 0
 -7 -3 -1 77.25 26.49 0
 -7 3 -1 111.06 25.06 0
 7 -3 1 108.14 30.08 0
 7 -3 1 97.31 23.94 0
 -7 -3 -1 110.49 26.86 0
 -9 -3 -1 339.75 28.77 0
 -9 3 -1 327.02 27.36 0
 9 -3 1 338 27.86 0
 -9 3 -1 368.29 28.5 0
 9 -3 1 379.69 33.65 0
 -9 -3 -1 376.58 28.35 0
 9 3 1 360.98 28.2 0
 9 3 1 339.48 28.08 0
 11 -3 1 871.88 30.24 0
 11 -3 1 804.95 29.45 0
 11 3 1 820.74 28.79 0
 11 3 1 933.05 28.64 0
 -11 -3 -1 858.37 28.18 0
 -11 3 -1 927.9 30.19 0
 -11 3 -1 838.9 33.37 0
 -11 -3 -1 943.21 28.24 0
 13 3 1 96.96 22.87 0
 13 -3 1 68.36 22.14 0
 -13 3 -1 62.73 22.67 0
 -13 3 -1 92.66 24.07 0
 -13 -3 -1 77.01 21.84 0
 13 3 1 80.4 22.41 0
 13 -3 1 74.21 22.87 0
 -13 -3 -1 88.75 22.58 0
 15 -3 1 288.04 21.99 0
 -15 -3 -1 257.28 20.25 0
 15 3 1 296.56 15.4 0
 -15 3 -1 280.25 21.91 0
 -15 3 -1 305.15 23.22 0
 15 -3 1 278.87 25.82 0
 15 3 1 267.12 19.84 0
 -15 -3 -1 304.84 20.52 0
 17 -3 1 -3.09 18.26 0
 17 3 1 10.55 13.75 0
 17 3 1 26.35 19.45 0
 -17 -3 -1 11.5 13.62 0
 -17 -3 -1 5.89 18.29 0
 -17 3 -1 1.07 18.44 0
 -17 3 -1 -7.12 19.06 0
 17 -3 1 -5.92 18.49 0
 -19 -3 -1 44.85 18.73 0
 -19 3 -1 42.47 18.95 0
 19 3 1 29.21 18.46 0
 -19 3 -1 38.34 17.93 0
 19 -3 1 28.87 18.19 0
 19 3 1 37.55 18.69 0
 -19 -3 -1 50.71 18.45 0
 19 -3 1 19.15 17.95 0
 21 -3 1 48.87 18.01 0
 -21 3 -1 46.39 17.4 0
 21 3 1 63.45 18.56 0
 -21 3 -1 42.15 19.04 0
 -21 -3 -1 39.7 19.17 0
 21 -3 1 35.98 18.9 0
 -21 -3 -1 46.67 19.37 0
 21 3 1 50.1 18.17 0
 -23 3 -1 21.68 18.95 0
 23 3 1 -10.64 17.35 0
 -23 3 -1 8.37 16.7 0
 23 -3 1 -9.76 16.92 0
 -23 -3 -1 -2.61 12.48 0
 23 3 1 -18.88 16.98 0
 -23 -3 -1 13.64 17.68 0
 23 -3 1 10.91 17.54 0
 -25 3 -1 12.86 17.66 0
 -25 3 -1 3.95 16.81 0
 -25 -3 -1 -3.07 17.33 0
 -25 -3 -1 4.68 16.69 0
 25 3 1 1.12 11.41 0
 25 -3 1 -9.09 16.75 0
 25 -3 1 -1.88 16.59 0
 25 3 1 -12.16 16.7 0
 27 3 1 24.02 17.08 0
 -27 3 -1 19.27 15.73 0
 27 3 1 27.46 16.12 0
 -27 -3 -1 31.51 17.02 0
 -27 -3 -1 37.44 16.99 0
 -27 3 -1 22.16 16.91 0
 27 -3 1 34.91 16.51 0
 27 -3 1 19.08 16.4 0
 29 3 1 50.32 15.61 0
 29 3 1 73.8 15.53 0
 -29 -3 -1 45.12 15.44 0
 -29 3 -1 69.18 15.54 0
 29 -3 1 53.42 15.96 0
 -29 -3 -1 67.21 16.04 0
 -29 3 -1 65.94 17.16 0
 29 -3 1 59.59 16.64 0
 -31 3 -1 3.04 16.37 0
 -31 -3 -1 14.03 15.43 0
 31 -3 1 16.23 15.41 0
 31 -3 1 16.87 15.92 0
 31 3 1 7.8 15.24 0
 -31 3 -1 5.63 15.7 0
 31 3 1 4.75 15.22 0
 -31 -3 -1 21.73 15.45 0
 33 3 1 -7.5 14.48 0
 33 3 1 7.53 14.61 0
 -33 -3 -1 12.44 14.97 0
 -33 -3 -1 14.88 14.74 0
 33 -3 1 1.97 15.29 0
 -33 3 -1 11.81 16.05 0
 -33 3 -1 14.65 15.42 0
 33 -3 1 -6.89 15.36 0
 35 -3 1 19.36 15.3 0
 -35 -3 -1 29.44 15.66 0
 35 -3 1 33.67 14.7 0
 -35 3 -1 56.88 15.9 0
 35 3 1 24.55 15.19 0
 -35 3 -1 26.32 14.05 0
 -35 -3 -1 20.09 15.05 0
 35 3 1 41.25 14.97 0
 36 4 -1 6.5 14.49 0
 -36 -4 1 10.99 14.41 0
 36 -4 -1 10.99 14.75 0
 -36 4 1 0.91 14.7 0
 36 4 -1 -14.38 10.18 0
 36 -4 -1 4.67 14.71 0
 -36 -4 1 19.28 15.09 0
 34 -4 -1 9.08 15.2 0
 -34 4 1 16.33 16.32 0
 -34 4 1 11.44 14.56 0
 34 4 -1 5.37 14.49 0
 34 -4 -1 16.67 15.12 0
 -34 -4 1 15.54 10.9 0
 -34 -4 1 19.99 15.06 0
 34 4 -1 28.72 15.12 0
 -32 -4 1 4.94 15.39 0
 32 -4 -1 5.25 14.66 0
 32 4 -1 -10.46 15.51 0
 32 4 -1 8.6 10.54 0
 -32 -4 1 19.95 15.94 0
 -32 4 1 1.48 14.43 0
 -32 4 1 5.83 16.11 0
 32 -4 -1 1.36 18.32 0
 -30 4 1 5.87 15.34 0
 -30 4 1 21.01 16.21 0
 30 -4 -1 24.68 15.66 0
 30 4 -1 12.64 15.65 0
 -30 -4 1 16.39 15.58 0
 30 -4 -1 -1.56 15.88 0
 -30 -4 1 23.38 15.71 0
 30 4 -1 18.61 15.51 0
 28 -4 -1 172.51 17.34 0
 28 -4 -1 197.61 17.64 0
 -28 4 1 173.13 16.62 0
 28 4 -1 186.82 16.89 0
 -28 -4 1 229.01 16.99 0
 -28 -4 1 196.55 17.05 0
 28 4 -1 178.33 16.6 0
 -28 4 1 221.84 18.97 0
 -26 -4 1 21.95 17.16 0
 -26 4 1 22.54 15.46 0
 26 -4 -1 18.24 16.4 0
 26 4 -1 18.09 16.56 0
 -26 4 1 16.34 18.11 0
 26 -4 -1 13.47 16.44 0
 26 4 -1 30.42 17.01 0
 -26 -4 1 22.03 16.91 0
 -24 4 1 17.86 18.28 0
 24 4 -1 9.9 17.41 0
 -24 -4 1 4.1 17.19 0
 -24 4 1 16.99 20.48 0
 24 -4 -1 16.96 19.78 0
 -24 -4 1 11.49 17.17 0
 24 -4 -1 8.47 16.82 0
 24 4 -1 10.89 16.92 0
 22 -4 -1 176.93 19.13 0
 -22 4 1 163.47 18.4 0
 -22 -4 1 176.91 14.04 0
 -22 4 1 207.29 24.09 0
 22 4 -1 170.91 17.87 0
 22 4 -1 190.74 18.38 0
 22 -4 -1 150.51 22.64 0
 -22 -4 1 168.46 12.87 0
 20 4 -1 -12.61 17.62 0
 -20 -4 1 18 18.46 0
 -20 -4 1 -2.45 17.89 0
 20 -4 -1 6.57 18.34 0
 20 -4 -1 8.09 18.4 0
 20 4 -1 3.98 17.86 0
 -20 4 1 -6.23 19.63 0
 -20 4 1 -8.37 17.88 0
 -18 -4 1 38.86 18.84 0
 18 4 -1 32.33 18.82 0
 -18 -4 1 49.56 19.35 0
 18 -4 -1 46.73 23.32 0
 18 4 -1 45.4 19.17 0
 18 -4 -1 40.01 23.28 0
 -18 4 1 35.5 22.94 0
 -18 4 1 54.18 25.28 0
 16 -4 -1 149.06 25.74 0
 16 4 -1 141.37 19.3 0
 16 4 -1 136.3 19.36 0
 -16 4 1 129.3 20.51 0
 -16 4 1 170.47 26.95 0
 -16 -4 1 148.1 20.04 0
 -16 -4 1 134.88 14.1 0
 16 -4 -1 125.73 25.59 0
 14 -4 -1 100.26 21.47 0
 -14 -4 1 113.82 20.22 0
 -14 4 1 94.81 25.14 0
 14 4 -1 92.81 19.88 0
 14 -4 -1 89.38 25.22 0
 -14 4 1 110.41 26.87 0
 -14 -4 1 95.7 14.17 0
 14 4 -1 99.5 19.47 0
 -12 4 1 270.5 29.32 0
 12 4 -1 279.9 22.07 0
 -12 -4 1 299.56 22.92 0
 12 4 -1 316.59 22.51 0
 -12 4 1 325.4 34.23 0
 12 -4 -1 298.93 29.68 0
 12 -4 -1 271.06 28.75 0
 -12 -4 1 317.53 23.22 0
 -10 -4 1 5.96 22.44 0
 -10 -4 1 -6.5 22.67 0
 -10 4 1 15.36 35.25 0
 10 -4 -1 6.77 35.24 0
 10 -4 -1 7.71 33.92 0
 10 4 -1 -2.69 22.36 0
 -10 4 1 3.91 34.03 0
 10 4 -1 5.38 21.48 0
 -8 -4 1 7.33 25.02 0
 8 4 -1 6.96 24.94 0
 8 -4 -1 12.2 40.4 0
 -8 -4 1 25.59 25.03 0
 8 4 -1 10.79 24.09 0
 -8 4 1 11.29 42 0
 8 -4 -1 14.14 43.79 0
 -8 4 1 6.42 41.84 0
 6 -4 -1 494.49 70.13 0
 -6 -4 1 487.27 29.48 0
 6 4 -1 458.54 34.04 0
 -6 4 1 503.66 68.44 0
 6 4 -1 491.48 28.64 0
 -6 -4 1 452.03 29.08 0
 4 4 -1 94.57 27.2 0
 -4 -4 1 102.23 24.82 0
 4 4 -1 103.1 26.42 0
 -4 -4 1 107.31 26.92 0
 2 4 -1 14 29.68 0
 -2 4 1 12.04 39.06 0
 -2 4 1 17.88 43.41 0
 2 -4 -1 13.72 44.14 0
 -2 -4 1 21.85 28.45 0
 2 4 -1 14.51 23.35 0
 -2 -4 1 11.07 22.34 0
 2 -4 -1 14.02 38.71 0
 0 -4 -1 531.12 37.29 0
 0 4 -1 542.58 33.34 0
 0 4 -1 532 30.71 0
 0 -4 -1 554.32 37.04 0
 0 -4 1 546.27 32.65 0
 0 4 1 550.1 35.99 0
 0 -4 1 567.96 33.3 0
 0 4 1 513.89 36.03 0
 2 4 1 168.94 31.24 0
 2 -4 1 172.07 31.53 0
 2 4 1 169.46 29.92 0
 2 -4 1 170.38 30.24 0
 -2 4 -1 158.74 31.59 0
 -2 -4 -1 178.49 34.1 0
 -2 -4 -1 159.1 30.88 0
 -2 4 -1 161.54 28.81 0
 -4 -4 -1 34.81 25.52 0
 4 4 1 36.31 25.2 0
 4 -4 1 44.74 31.81 0
 -4 4 -1 45.45 35.13 0
 4 4 1 47.9 31.96 0
 4 -4 1 38.36 28.26 0
 -4 -4 -1 37.8 26.64 0
 -4 4 -1 38.53 29.8 0
 -6 -4 -1 9.21 25.49 0
 -6 -4 -1 5.49 26.51 0
 6 -4 1 5.98 32.17 0
 -6 4 -1 4.68 30.16 0
 6 -4 1 8.93 30.53 0
 6 4 1 11.27 25.82 0
 6 4 1 12.63 25.83 0
 -6 4 -1 17.04 34.01 0
 -8 -4 -1 292.61 25.2 0
 -8 -4 -1 275.19 25.41 0
 -8 4 -1 257.01 26.38 0
 8 4 1 287.12 24.99 0
 8 4 1 263.76 25.02 0
 -8 4 -1 308.59 31.51 0
 8 -4 1 259.98 30.51 0
 8 -4 1 296.14 33.75 0
 10 -4 1 513.23 31.59 0
 -10 -4 -1 543.89 23.95 0
 -10 4 -1 577.14 33.08 0
 10 -4 1 552.1 32.54 0
 -10 -4 -1 518.18 24.03 0
 -10 4 -1 516.11 27.66 0
 10 4 1 541.88 24.62 0
 10 4 1 486.85 23.91 0
 12 4 1 121.45 21.83 0
 12 -4 1 125.26 26.87 0
 -12 4 -1 111.8 26.58 0
 -12 4 -1 130.44 27.02 0
 -12 -4 -1 144.35 21.99 0
 12 -4 1 109.68 26.53 0
 -12 -4 -1 121.4 21.88 0
 12 4 1 120.36 20.74 0
 14 -4 1 148.28 22.17 0
 14 -4 1 182.5 26.14 0
 14 4 1 165.73 21.35 0
 -14 -4 -1 183.56 21.09 0
 -14 4 -1 162.81 26.43 0
 -14 -4 -1 173.56 21.52 0
 14 4 1 173.7 20.72 0
 -14 4 -1 197.16 22.52 0
 -16 -4 -1 11.5 18.35 0
 -16 4 -1 12.25 18.99 0
 -16 -4 -1 4.35 19.42 0
 -16 4 -1 -1.42 23.85 0
 16 -4 1 6.99 23.1 0
 16 4 1 15.98 12.85 0
 16 4 1 3.52 18.79 0
 16 -4 1 11.29 22.37 0
 -18 -4 -1 84.32 19.4 0
 18 -4 1 77.43 18.48 0
 18 4 1 71.95 19.38 0
 -18 -4 -1 81.7 19.15 0
 18 -4 1 62.99 18.48 0
 18 4 1 62 13.17 0
 -18 4 -1 65.25 18.44 0
 -18 4 -1 89.99 19.22 0
 20 -4 1 -10.26 23.59 0
 -20 -4 -1 -23.57 18.14 0
 20 4 1 17.44 17.93 0
 -20 -4 -1 17.1 17.76 0
 20 -4 1 -4.33 19.03 0
 20 4 1 -2.81 17.68 0
 -20 4 -1 5.14 19.62 0
 -20 4 -1 8.33 22.42 0
 -22 -4 -1 -0.45 17.12 0
 22 4 1 3.34 16.08 0
 22 4 1 -0.34 11.91 0
 22 -4 1 -6.25 20.84 0
 -22 4 -1 -8.63 17.88 0
 -22 4 -1 -1.3 20.15 0
 22 -4 1 -5.65 17.17 0
 -22 -4 -1 16.7 16.71 0
 -24 -4 -1 298.55 17.63 0
 24 -4 1 315 18.5 0
 24 4 1 299.02 17.87 0
 -24 -4 -1 319.84 13.62 0
 -24 4 -1 359.16 18.56 0
 24 4 1 330.14 17.95 0
 -24 4 -1 291.18 17.42 0
 24 -4 1 277.32 17.38 0
 26 -4 1 -2.54 19.4 0
 -26 4 -1 6.58 16.84 0
 -26 4 -1 8.06 18.64 0
 -26 -4 -1 18.55 17.02 0
 -26 -4 -1 6.52 17.22 0
 26 4 1 -10.26 11.68 0
 26 4 1 11.89 12.19 0
 26 -4 1 7.74 15.61 0
 -28 -4 -1 27.35 15.05 0
 28 4 1 45.74 15.09 0
 28 4 1 56 15.68 0
 28 -4 1 39.19 15.31 0
 -28 -4 -1 56.15 16.17 0
 -28 4 -1 34.73 14.72 0
 -28 4 -1 43.96 15.83 0
 28 -4 1 36.8 15.83 0
 -30 -4 -1 64.16 15.73 0
 -30 4 -1 42.99 16.57 0
 -30 -4 -1 45.13 16.49 0
 30 -4 1 38.71 15.45 0
 30 -4 1 22.58 15.87 0
 30 4 1 51.75 15.4 0
 30 4 1 43.36 15.51 0
 -30 4 -1 64.12 15.52 0
 32 4 1 -5.88 10.26 0
 32 -4 1 17.79 14.99 0
 -32 4 -1 15.78 19.46 0
 32 4 1 1.97 14.57 0
 -32 -4 -1 23.44 15.07 0
 -32 -4 -1 28.74 14.67 0
 32 -4 1 19.69 16 0
 -32 4 -1 12.58 15.13 0
 -34 -4 -1 80.73 15.58 0
 -34 4 -1 67.1 15.73 0
 34 4 1 64.56 15.11 0
 34 4 1 65.95 10.79 0
 34 -4 1 76.82 16.2 0
 -34 -4 -1 70.19 14.72 0
 -34 4 -1 82.31 17 0
 34 -4 1 68.94 15.42 0
 33 -5 -1 90.8 19.53 0
 33 5 -1 101.07 15.63 0
 -33 -5 1 118.54 15.37 0
 33 -5 -1 95.81 16.38 0
 33 5 -1 81.9 15.11 0
 -33 -5 1 79.27 15.27 0
 -33 5 1 83.15 15.83 0
 -33 5 1 104.37 20.64 0
 31 5 -1 -12.14 15.62 0
 -31 -5 1 0.29 15.01 0
 -31 -5 1 24.9 15.02 0
 31 -5 -1 14.22 18.3 0
 -31 5 1 6.16 14.21 0
 31 -5 -1 11.87 19.44 0
 31 5 -1 13.02 15.17 0
 -31 5 1 4.09 19.8 0
 29 5 -1 33.14 15.7 0
 29 5 -1 41.14 15.77 0
 -29 5 1 52.18 17.32 0
 29 -5 -1 35.3 19.8 0
 -29 -5 1 25.93 16.09 0
 -29 -5 1 34.28 15.59 0
 -29 5 1 32.44 15.85 0
 29 -5 -1 35.21 15.57 0
 -27 -5 1 228.44 12.74 0
 27 -5 -1 181.85 17.87 0
 27 5 -1 209.58 17.3 0
 -27 5 1 200.11 20.77 0
 27 -5 -1 211.42 18.03 0
 -27 -5 1 195.2 16.12 0
 27 5 -1 192.12 16.44 0
 -27 5 1 225.15 18.92 0
 -25 -5 1 18.14 17.22 0
 25 5 -1 27.85 12.17 0
 25 -5 -1 11.76 16.21 0
 -25 5 1 17.98 17.61 0
 -25 5 1 21.5 16.22 0
 25 -5 -1 12.52 20.65 0
 -25 -5 1 18.94 17.34 0
 25 5 -1 14.4 16.56 0
 -23 5 1 285.89 19.9 0
 23 5 -1 272.69 14.12 0
 23 -5 -1 279.19 20.19 0
 -23 -5 1 325.22 18.84 0
 -23 5 1 329.46 25.48 0
 -23 -5 1 280.68 18.84 0
 23 5 -1 298.94 17.82 0
 23 -5 -1 267.11 23.4 0
 -21 5 1 12.43 18.46 0
 21 5 -1 16.95 16.36 0
 -21 -5 1 8.6 11.65 0
 -21 5 1 30.74 21.08 0
 21 -5 -1 19.69 18.26 0
 -21 -5 1 17.53 17.34 0
 21 5 -1 19.46 16.68 0
 21 -5 -1 22.26 18.53 0
 -19 5 1 48.04 23.94 0
 -19 -5 1 38.12 18 0
 19 5 -1 30.98 17.78 0
 -19 5 1 42.9 23.08 0
 19 -5 -1 28.68 18.83 0
 -19 -5 1 38.01 17.98 0
 19 -5 -1 36.12 19.06 0
 19 5 -1 60.31 18.02 0
 -17 5 1 869.03 26.04 0
 17 -5 -1 805.18 28.51 0
 17 5 -1 813.47 22.04 0
 17 5 -1 768.76 22.42 0
 -17 5 1 769.17 28.46 0
 -17 -5 1 793.5 22.15 0
 -17 -5 1 881.49 22.7 0
 17 -5 -1 721.26 24.92 0
 -15 5 1 207.16 25.68 0
 -15 -5 1 164.98 19.49 0
 15 -5 -1 191.34 24.94 0
 15 5 -1 189.81 19.67 0
 15 -5 -1 174.01 26.18 0
 -15 5 1 174.04 24.34 0
 -15 -5 1 181.72 13.63 0
 15 5 -1 172.88 18.31 0
 13 -5 -1 96.42 29.89 0
 -13 -5 1 88.07 19.68 0
 13 5 -1 88.91 18.51 0
 -13 -5 1 76.87 19.71 0
 -13 5 1 75.08 29.22 0
 -13 5 1 88.57 26.6 0
 13 5 -1 94.93 18.69 0
 13 -5 -1 72.22 28.51 0
 11 5 -1 836.67 23.42 0
 -11 5 1 973.33 39.43 0
 -11 -5 1 849.04 22.64 0
 11 -5 -1 914.06 39.59 0
 11 -5 -1 769.19 36.8 0
 11 5 -1 880.34 19.07 0
 -11 5 1 807.57 41.35 0
 -11 -5 1 870.98 23.2 0
 -9 5 1 49.93 39.54 0
 9 -5 -1 56.82 41.83 0
 -9 -5 1 66.51 21.3 0
 9 5 -1 56.89 20.54 0
 9 -5 -1 46.34 34.93 0
 -9 -5 1 53.07 20.02 0
 9 5 -1 62.87 25.21 0
 -9 5 1 65.88 37.68 0
 -7 -5 1 1550.68 33.45 0
 7 5 -1 1520.36 30.24 0
 7 5 -1 1626.14 30.61 0
 -7 -5 1 1682.72 30.91 0
 -5 -5 1 218.24 24.82 0
 -5 -5 1 223.87 24.15 0
 5 5 -1 219.86 29.31 0
 5 5 -1 229.66 29.29 0
 3 -5 -1 15.68 39.59 0
 -3 -5 1 17.27 28.52 0
 3 -5 -1 14.43 40.93 0
 -3 5 1 14.64 37.87 0
 3 5 -1 13.76 29.13 0
 3 5 -1 14.23 27.52 0
 -3 5 1 8.21 43.58 0
 -1 5 1 808.68 40.42 0
 1 -5 -1 829.12 40.91 0
 -1 5 1 802.65 43.78 0
 1 -5 -1 822.67 45.64 0
 -1 -5 1 781.22 28.94 0
 1 5 -1 809.6 35 0
 -1 -5 1 874.91 36.02 0
 1 5 -1 785.4 28.87 0
 1 -5 1 677.1 32.75 0
 -1 5 -1 646.71 32.94 0
 1 -5 1 705.23 36.37 0
 -1 -5 -1 694.35 36.32 0
 1 5 1 635.66 35.31 0
 -1 5 -1 672.31 35.47 0
 1 5 1 698.69 34.34 0
 -1 -5 -1 647.37 34.09 0
 3 5 1 102.86 24.74 0
 3 -5 1 108.56 35.02 0
 3 5 1 109.97 23.36 0
 -3 5 -1 103.75 34.58 0
 -3 5 -1 106.28 27.39 0
 3 -5 1 107.78 32.64 0
 -3 -5 -1 99.96 28.98 0
 -3 -5 -1 128.01 25.17 0
 5 5 1 720.91 27.15 0
 -5 -5 -1 709.11 31.73 0
 -5 5 -1 772.08 37.62 0
 -5 -5 -1 778.03 28.58 0
 5 -5 1 817.13 39.17 0
 5 5 1 741.13 27.9 0
 5 -5 1 731.19 38.29 0
 -5 5 -1 717.57 34.3 0
 7 5 1 148.83 22.01 0
 -7 5 -1 137.2 26.91 0
 7 5 1 141.91 22.48 0
 7 -5 1 154.83 29 0
 7 -5 1 140.81 30.51 0
 -7 5 -1 151.27 30.49 0
 -7 -5 -1 142.34 22.12 0
 -7 -5 -1 165.56 23.74 0
 -9 5 -1 272.33 26.85 0
 -9 5 -1 299.08 27.04 0
 9 5 1 303.99 21.92 0
 -9 -5 -1 270.96 21.76 0
 -9 -5 -1 308.56 21.72 0
 9 -5 1 256.24 26.29 0
 9 -5 1 316.23 28.73 0
 9 5 1 254.4 20.48 0
 11 -5 1 398.76 29.06 0
 11 -5 1 356.69 26.94 0
 11 5 1 356.92 20.77 0
 -11 5 -1 367.05 28.09 0
 11 5 1 399.39 20.77 0
 -11 -5 -1 389.23 20.3 0
 -11 5 -1 411.56 28.63 0
 -11 -5 -1 346.1 20.95 0
 13 -5 1 9.92 23.12 0
 13 5 1 8.72 17.97 0
 13 -5 1 18.05 23.75 0
 -13 -5 -1 18.04 17.1 0
 -13 5 -1 19.14 25.33 0
 -13 5 -1 19.8 23.08 0
 13 5 1 12.8 18.78 0
 -13 -5 -1 22.62 19.13 0
 -15 -5 -1 55.1 19.54 0
 15 5 1 49.33 19.61 0
 -15 5 -1 68.98 24.25 0
 -15 5 -1 56.5 23.59 0
 15 5 1 56.62 18.3 0
 15 -5 1 54.38 23.81 0
 -15 -5 -1 50.26 12.48 0
 15 -5 1 50.37 22.85 0
 17 5 1 14.06 17.76 0
 -17 5 -1 24.66 18.63 0
 17 5 1 19.28 17.77 0
 -17 -5 -1 33.4 17.93 0
 -17 5 -1 21.01 23.69 0
 -17 -5 -1 14.15 17.48 0
 17 -5 1 25.17 18.32 0
 17 -5 1 7.63 22.84 0
 19 -5 1 29.59 18.42 0
 19 -5 1 28.28 17.77 0
 -19 -5 -1 30.6 17.91 0
 -19 -5 -1 28.49 12.71 0
 -19 5 -1 31.91 18.68 0
 19 5 1 35.57 18.19 0
 -19 5 -1 49.47 21.9 0
 19 5 1 31.05 17.68 0
 -21 5 -1 375.27 24.02 0
 21 -5 1 339.41 19.65 0
 -21 -5 -1 331.52 18.06 0
 21 5 1 307.12 13.99 0
 21 -5 1 307.69 19.57 0
 -21 -5 -1 376.57 18.92 0
 21 5 1 354.54 13.47 0
 -21 5 -1 325.76 19.36 0
 -23 -5 -1 53.52 16.45 0
 23 5 1 51.84 11.94 0
 23 -5 1 38.25 20.2 0
 -23 -5 -1 46.72 17.13 0
 -23 5 -1 83.26 21.06 0
 23 -5 1 61.26 17.84 0
 -23 5 -1 57.07 16.68 0
 23 5 1 45.03 16.15 0
 -25 -5 -1 7.34 17.03 0
 -25 5 -1 4.39 17.39 0
 25 5 1 16.88 15.39 0
 25 5 1 7.35 16.79 0
 25 -5 1 13.24 20.34 0
 -25 5 -1 5.03 20.19 0
 -25 -5 -1 23.44 17.74 0
 25 -5 1 22.64 17.24 0
 27 5 1 -4.69 15.36 0
 -27 -5 -1 8.73 15.4 0
 27 -5 1 5.32 19.4 0
 27 -5 1 6.2 15.9 0
 -27 -5 -1 11.04 11.13 0
 -27 5 -1 10.56 14.94 0
 -27 5 -1 -0.38 19.63 0
 27 5 1 21.18 14.87 0
 29 -5 1 -3.33 15.03 0
 -29 -5 -1 5.68 15.69 0
 -29 -5 -1 -12.73 15.93 0
 29 5 1 20.03 15.29 0
 -29 5 -1 12.64 19.7 0
 29 5 1 -2.39 11 0
 -29 5 -1 -3 14.83 0
 29 -5 1 3.14 19.26 0
 -31 5 -1 -2.36 15.86 0
 -31 5 -1 -2.04 14.55 0
 31 5 1 -7 14.59 0
 31 -5 1 11.23 18.25 0
 -31 -5 -1 19 15 0
 31 5 1 11.06 14.27 0
 -31 -5 -1 16.66 14.63 0
 31 -5 1 19.37 15.15 0
 33 5 1 16.07 10.16 0
 33 5 1 8.85 14.53 0
 -33 5 -1 5.22 15.64 0
 33 -5 1 17.31 14.31 0
 -33 -5 -1 -6.3 10.89 0
 -33 -5 -1 -7.27 14.68 0
 -33 5 -1 0.26 19.02 0
 33 -5 1 18.82 15.21 0
 32 6 -1 19.76 15.45 0
 -32 6 1 32.58 16.68 0
 -32 -6 1 35.3 15.55 0
 32 6 -1 43.44 14.93 0
 -32 -6 1 67.03 15.31 0
 32 -6 -1 32.2 15.72 0
 32 -6 -1 16.66 16.32 0
 -32 6 1 33.32 18.74 0
 -30 6 1 -3.51 17.41 0
 30 -6 -1 1.28 19.49 0
 30 6 -1 -4.59 15.08 0
 30 6 -1 -0.72 14.46 0
 -30 -6 1 10.62 14.79 0
 30 -6 -1 2.05 17.15 0
 -30 -6 1 5.45 14.8 0
 -30 6 1 2.92 16.12 0
 28 6 -1 70.7 16.14 0
 -28 6 1 97.57 17.6 0
 -28 -6 1 88.91 16.48 0
 -28 6 1 70.18 19.9 0
 -28 -6 1 76.08 15.96 0
 28 -6 -1 71.2 16.81 0
 28 6 -1 68.73 15.07 0
 28 -6 -1 97.75 16.58 0
 26 -6 -1 5.58 16.34 0
 26 -6 -1 13.34 19.42 0
 -26 6 1 17.59 19.92 0
 -26 -6 1 13.63 10.34 0
 26 6 -1 10.9 15.34 0
 -26 6 1 21.25 18.99 0
 -26 -6 1 7.3 15.47 0
 26 6 -1 26.61 15.61 0
 24 6 -1 12.94 15.28 0
 -24 -6 1 0.57 15.61 0
 -24 6 1 -2.43 23.46 0
 24 6 -1 -7.35 15.1 0
 24 -6 -1 5.96 17.33 0
 -24 -6 1 3.31 17.05 0
 24 -6 -1 -1.24 21.78 0
 -24 6 1 6.73 21.08 0
 -22 6 1 122.44 22.88 0
 22 -6 -1 106.72 23.65 0
 -22 -6 1 140.89 17.13 0
 22 6 -1 130.55 15.51 0
 -22 -6 1 115.79 16.65 0
 22 -6 -1 124.44 19.54 0
 22 6 -1 104.27 16.44 0
 -22 6 1 135.65 24.51 0
 -20 6 1 62.4 24.29 0
 20 6 -1 71.1 16.44 0
 -20 -6 1 58.74 16.25 0
 20 6 -1 51.04 16.55 0
 -20 6 1 56.1 23.35 0
 20 -6 -1 57.03 23.16 0
 -20 -6 1 53.67 17.06 0
 20 -6 -1 60.44 23.06 0
 18 -6 -1 462.35 27.09 0
 -18 -6 1 459.31 19.6 0
 -18 6 1 505.74 28.11 0
 18 6 -1 466.23 20 0
 -18 -6 1 491.6 15.74 0
 18 -6 -1 416.51 26.49 0
 -18 6 1 471.92 27.13 0
 18 6 -1 482.81 19.74 0
 -16 -6 1 224.85 19.32 0
 -16 6 1 211.05 25.06 0
 16 -6 -1 175.03 27.04 0
 16 -6 -1 196.95 27.57 0
 16 6 -1 208.08 18.74 0
 -16 6 1 192.53 24.63 0
 -16 -6 1 201.55 18.4 0
 16 6 -1 190.88 19.17 0
 14 6 -1 -0.67 16.96 0
 -14 6 1 4.51 28.58 0
 -14 -6 1 13.45 17.44 0
 14 -6 -1 -2.2 24.22 0
 14 6 -1 2.35 16.42 0
 14 -6 -1 -4.47 25.04 0
 -14 6 1 1.59 25.09 0
 -14 -6 1 0.63 17.33 0
 -12 6 1 229.33 36.29 0
 -12 -6 1 278.91 18.54 0
 12 -6 -1 265.72 37.86 0
 12 6 -1 242.53 19.76 0
 12 -6 -1 221.19 34.66 0
 -12 6 1 262.88 34.19 0
 12 6 -1 255.04 18.33 0
 -12 -6 1 241.62 18.64 0
 10 6 -1 58.7 22.47 0
 -10 -6 1 61.08 17.31 0
 -10 -6 1 63 18.33 0
 10 6 -1 68.83 17.61 0
 8 6 -1 9.16 18.74 0
 -8 -6 1 -2.35 22.73 0
 8 6 -1 6.29 19.17 0
 -8 -6 1 19.39 18.78 0
 6 6 -1 422.66 22.28 0
 -6 -6 1 410.65 27.06 0
 6 6 -1 409 26.91 0
 -6 -6 1 386.18 22.14 0
 -4 6 1 38.3 36.95 0
 4 6 -1 43.42 19.1 0
 4 -6 -1 51.44 43.11 0
 -4 -6 1 40.13 25.07 0
 4 -6 -1 40.59 42.16 0
 -4 6 1 43.2 40.34 0
 4 6 -1 31.64 24.66 0
 2 -6 -1 106.81 35.16 0
 -2 -6 1 117.47 26.01 0
 -2 -6 1 120.64 23.87 0
 -2 6 1 106.45 33.59 0
 -2 6 1 99.51 27.13 0
 2 -6 -1 107.22 30.96 0
 2 6 -1 112.87 25.66 0
 2 6 -1 104.9 20.07 0
 0 6 -1 771.29 29.62 0
 0 6 1 755.62 31.23 0
 0 6 1 786.32 36.95 0
 0 -6 1 799.52 28.93 0
 0 -6 -1 801.11 34.44 0
 0 -6 -1 795.73 37.69 0
 0 -6 1 802.92 32.77 0
 0 6 -1 796.03 31.73 0
 2 -6 1 4.17 27 0
 -2 -6 -1 12.46 24.24 0
 -2 -6 -1 2.84 25.6 0
 -2 6 -1 13.13 24.18 0
 2 -6 1 7.14 25.1 0
 2 6 1 11.89 25.7 0
 2 6 1 16.14 24.16 0
 -2 6 -1 7.8 22.35 0
 -4 6 -1 112.01 29.53 0
 4 -6 1 118.18 28.52 0
 -4 -6 -1 101.85 25.76 0
 4 6 1 111.15 25.58 0
 4 6 1 122.73 24.79 0
 -4 -6 -1 109.64 24.71 0
 -4 6 -1 100.66 27.04 0
 4 -6 1 104.26 25.53 0
 -6 6 -1 2.14 27.43 0
 -6 -6 -1 -2.22 23.9 0
 -6 -6 -1 7.64 19.66 0
 6 6 1 6.59 19.98 0
 6 6 1 1.01 19.05 0
 6 -6 1 5.05 32.09 0
 6 -6 1 1.62 31.74 0
 -8 6 -1 50.43 27.46 0
 -8 -6 -1 52.02 18.61 0
 8 6 1 51.87 19.85 0
 -8 -6 -1 66.85 23.82 0
 8 6 1 56.18 18.46 0
 -8 6 -1 49.46 29.08 0
 8 -6 1 43.08 29.43 0
 8 -6 1 44.3 27.57 0
 10 -6 1 211.78 25.36 0
 10 -6 1 230.03 29.72 0
 10 6 1 226.23 18.55 0
 -10 -6 -1 231.93 19.75 0
 10 6 1 228.67 18.73 0
 -10 -6 -1 195.49 23.11 0
 -10 6 -1 219.87 25.34 0
 -10 6 -1 215.61 29.38 0
 12 -6 1 -3.83 27.05 0
 -12 -6 -1 13.8 17.75 0
 12 -6 1 16.29 25.14 0
 -12 6 -1 9.37 23.13 0
 12 6 1 22.39 17.6 0
 -12 6 -1 0.58 23.56 0
 12 6 1 8.97 16.95 0
 -12 -6 -1 11.2 12.51 0
 -14 6 -1 27.09 22.37 0
 14 -6 1 21.75 21.91 0
 -14 -6 -1 49.61 17.53 0
 -14 -6 -1 41.63 18.33 0
 14 -6 1 29.63 25.68 0
 14 6 1 28.01 17.15 0
 14 6 1 33.13 18.33 0
 -14 6 -1 35.75 22.55 0
 -16 6 -1 73.4 23.12 0
 -16 -6 -1 52.9 18.03 0
 -16 6 -1 57.54 22.35 0
 -16 -6 -1 51.92 18.64 0
 16 6 1 62.65 18.64 0
 16 -6 1 64.17 23.78 0
 16 6 1 56.02 17.72 0
 16 -6 1 51.86 21.86 0
 18 -6 1 114.98 19.29 0
 18 6 1 123.51 18.17 0
 -18 6 -1 151.42 21.78 0
 18 6 1 143.21 18.4 0
 -18 -6 -1 155.43 18.67 0
 18 -6 1 133.14 24.2 0
 -18 6 -1 116.82 23.06 0
 -18 -6 -1 138.9 17.94 0
 -20 6 -1 54.88 17.47 0
 -20 -6 -1 55.96 15.98 0
 -20 6 -1 53.61 17.92 0
 20 -6 1 42.71 18.74 0
 20 -6 1 68.62 18.54 0
 20 6 1 56.02 16.9 0
 20 6 1 51.9 16.22 0
 -20 -6 -1 73.47 17.58 0
 -22 6 -1 3.4 22.69 0
 -22 6 -1 -6.78 20.9 0
 -22 -6 -1 -2.68 16.94 0
 22 -6 1 -3.52 20.92 0
 -22 -6 -1 26.17 16.35 0
 22 -6 1 6.03 18.54 0
 22 6 1 9.7 16.04 0
 22 6 1 23.3 16 0
 -24 -6 -1 199.7 16.95 0
 -24 -6 -1 175.79 17.11 0
 -24 6 -1 205.25 22.81 0
 24 6 1 169.1 16.82 0
 24 -6 1 193.99 18.67 0
 24 6 1 186.88 11.71 0
 -24 6 -1 157.53 21.28 0
 24 -6 1 170.29 22.25 0
 -26 6 -1 13.21 16.93 0
 -26 -6 -1 32.74 16.15 0
 -26 -6 -1 33.07 15.63 0
 26 -6 1 22.36 20.42 0
 26 -6 1 31.12 20.41 0
 26 6 1 29.65 15.53 0
 26 6 1 19.97 14.63 0
 -26 6 -1 18.72 15.54 0
 -28 6 -1 16.86 19.7 0
 -28 -6 -1 3.67 15.23 0
 28 6 1 8.95 10.86 0
 -28 6 -1 25.37 16.54 0
 28 -6 1 13.11 16.4 0
 28 6 1 12.24 11.15 0
 -28 -6 -1 13.78 15.8 0
 28 -6 1 18.96 16.7 0
 -30 -6 -1 41.33 14.68 0
 -30 6 -1 58.16 20.33 0
 30 6 1 40.45 14.66 0
 30 6 1 26.37 15.14 0
 -30 -6 -1 30.79 14.97 0
 30 -6 1 41.76 16.66 0
 -30 6 -1 37.08 15.82 0
 30 -6 1 39.47 20.51 0
 -32 6 -1 -0.03 16.05 0
 -32 -6 -1 7.31 14.55 0
 -32 6 -1 13.39 15.27 0
 32 6 1 11.55 14.23 0
 32 6 1 -8.14 14.72 0
 32 -6 1 19.13 15.16 0
 32 -6 1 -6.06 19.42 0
 -32 -6 -1 -1.05 10.2 0
 31 7 -1 1.96 14.36 0
 -31 -7 1 -2.58 14.86 0
 -31 7 1 8.71 20.47 0
 31 7 -1 4.61 14.82 0
 31 -7 -1 -16.12 20.25 0
 -31 7 1 6.43 15.14 0
 31 -7 -1 -11.71 20.52 0
 -31 -7 1 -2.82 14.71 0
 29 7 -1 76.92 15.56 0
 -29 7 1 86.49 21.53 0
 -29 7 1 69.06 15.81 0
 -29 -7 1 99.07 11.57 0
 29 -7 -1 74.03 20.56 0
 29 7 -1 74.36 14.79 0
 29 -7 -1 83.12 19.66 0
 -29 -7 1 73.31 15.37 0
 -27 7 1 90.24 22.15 0
 -27 7 1 69.73 16.76 0
 27 -7 -1 85.83 21.27 0
 -27 -7 1 83.42 15.06 0
 27 -7 -1 78.55 21.37 0
 -27 -7 1 103.29 15.59 0
 27 7 -1 75.5 14.76 0
 27 7 -1 87.97 15.48 0
 -25 7 1 46.23 21.09 0
 25 -7 -1 30.64 20.87 0
 25 7 -1 42.91 15.16 0
 -25 7 1 30.93 19.98 0
 -25 -7 1 39.74 15.02 0
 25 7 -1 28.72 15.25 0
 25 -7 -1 27.24 20.9 0
 -25 -7 1 44.08 14.39 0
 23 7 -1 75.14 11.73 0
 -23 -7 1 100.38 16.85 0
 23 -7 -1 77.87 20.97 0
 -23 -7 1 70.57 16.71 0
 23 -7 -1 66.19 23.84 0
 23 7 -1 54.76 11.56 0
 -23 7 1 64.59 21.43 0
 -23 7 1 56.42 23.22 0
 21 7 -1 31.25 17.41 0
 -21 -7 1 52.8 16.53 0
 -21 7 1 31.02 23.8 0
 21 -7 -1 39.85 23.31 0
 21 -7 -1 33.05 23.46 0
 21 7 -1 47.41 17.49 0
 -21 7 1 33.93 21.26 0
 -21 -7 1 37.84 16.92 0
 19 7 -1 28.82 17.21 0
 19 7 -1 37.98 16.69 0
 19 -7 -1 38.95 21.06 0
 -19 -7 1 32.53 15.92 0
 -19 -7 1 44.84 16.41 0
 -19 7 1 41.95 24.75 0
 19 -7 -1 38.86 25.61 0
 -19 7 1 43.14 25.65 0
 17 -7 -1 849.86 38.4 0
 17 -7 -1 979.18 38.45 0
 -17 -7 1 915.04 22.02 0
 17 7 -1 946.83 22.17 0
 -17 7 1 893.41 38.55 0
 -17 7 1 1017.04 38.85 0
 -17 -7 1 1021.69 22.82 0
 17 7 -1 987.26 21.41 0
 15 -7 -1 19.11 32.51 0
 -15 7 1 17.32 34.8 0
 -15 7 1 15.44 35.61 0
 15 7 -1 15.25 18.28 0
 15 7 -1 11.75 17.78 0
 15 -7 -1 17.26 33.66 0
 -15 -7 1 21.47 18.14 0
 -15 -7 1 24.35 18.21 0
 13 7 -1 39.1 17.97 0
 13 7 -1 34.48 17.79 0
 -13 -7 1 48.52 17.84 0
 -13 -7 1 41.04 18.94 0
 -11 -7 1 382.71 19.51 0
 11 7 -1 378.62 20.44 0
 11 7 -1 414.84 20.1 0
 -11 -7 1 403.25 20.5 0
 -9 -7 1 101.99 17.86 0
 -9 -7 1 108.35 18.55 0
 9 7 -1 119.46 22.43 0
 9 7 -1 103.98 18.75 0
 -7 -7 1 263.31 20.16 0
 7 7 -1 253.61 19.5 0
 7 7 -1 244.64 20.5 0
 -7 -7 1 227.14 22.96 0
 -5 -7 1 313.41 24.08 0
 5 7 -1 300.08 24.38 0
 -5 -7 1 306.52 25.47 0
 5 7 -1 293.16 21.62 0
 -3 7 1 25.33 29.9 0
 3 7 -1 30.31 17.71 0
 -3 -7 1 31.76 22.05 0
 3 -7 -1 31.25 30.56 0
 -3 -7 1 24.26 23.39 0
 -3 7 1 29.29 32.16 0
 3 7 -1 25.77 23.6 0
 3 -7 -1 21.88 34.7 0
 -1 -7 1 1031.48 29.35 0
 1 7 -1 975.24 31.33 0
 1 -7 -1 1029.88 35.3 0
 -1 -7 1 996.37 32.87 0
 -1 7 1 1015.71 38.27 0
 1 7 -1 1000.03 29.73 0
 1 -7 -1 997.56 35.24 0
 -1 7 1 996.04 34.88 0
 1 -7 1 24.58 25.69 0
 1 7 1 19.2 25.7 0
 -1 7 -1 29.97 21.92 0
 1 7 1 22.4 24.24 0
 -1 7 -1 25.71 23.83 0
 -1 -7 -1 26.79 23.64 0
 -1 -7 -1 30.91 23.44 0
 1 -7 1 27.69 27.13 0
 -3 7 -1 102.03 25.52 0
 3 -7 1 106.1 27.95 0
 3 7 1 105.39 24.21 0
 3 7 1 95.1 23.08 0
 -3 -7 -1 117.03 22.89 0
 3 -7 1 119.9 26.62 0
 -3 -7 -1 97.05 20.01 0
 -3 7 -1 102.49 29.19 0
 5 -7 1 357.24 30.23 0
 -5 7 -1 323.52 31.92 0
 5 7 1 328.94 25.97 0
 -5 -7 -1 324.58 24.97 0
 5 -7 1 316.58 31.49 0
 5 7 1 349.01 25.57 0
 -5 -7 -1 348.46 26.09 0
 -5 7 -1 331.59 30.63 0
 7 -7 1 1.79 29.21 0
 -7 -7 -1 8.33 18.25 0
 7 7 1 4.38 18.14 0
 -7 -7 -1 11.6 23.17 0
 7 7 1 17.63 18.76 0
 7 -7 1 5.33 27.94 0
 -7 7 -1 6.69 24.69 0
 -7 7 -1 3.9 27.65 0
 9 -7 1 14.46 31.3 0
 -9 7 -1 17.42 28.54 0
 9 7 1 21.8 17.7 0
 9 -7 1 17.89 28.76 0
 -9 -7 -1 26.28 21.93 0
 9 7 1 20.43 22.4 0
 -9 -7 -1 24.01 18.16 0
 -11 7 -1 298.42 28.53 0
 -11 -7 -1 300.79 20.07 0
 -11 -7 -1 265.03 20.5 0
 11 7 1 294.06 19.47 0
 -11 7 -1 262.75 29.55 0
 11 -7 1 272.17 31.36 0
 11 7 1 281.94 20.59 0
 11 -7 1 306.25 32.53 0
 13 7 1 23.61 18.44 0
 13 -7 1 18.21 25.43 0
 13 7 1 15.18 16.99 0
 -13 7 -1 19.95 26.49 0
 -13 -7 -1 12.45 17.08 0
 13 -7 1 18.15 25.75 0
 -13 -7 -1 16.11 18.72 0
 -13 7 -1 16.75 28.35 0
 -15 7 -1 126.79 26.55 0
 -15 -7 -1 137.16 19 0
 15 -7 1 127.94 26.28 0
 -15 7 -1 140.26 24.11 0
 -15 -7 -1 124.03 18.63 0
 15 -7 1 137.03 27.89 0
 15 7 1 129.73 18.37 0
 15 7 1 128.5 18.21 0
 17 -7 1 22.37 22.67 0
 -17 -7 -1 43.21 17.01 0
 -17 7 -1 42.26 26.44 0
 17 7 1 33.16 17.04 0
 -17 7 -1 34.65 21.78 0
 -17 -7 -1 17.31 17.69 0
 17 -7 1 25.95 22.31 0
 17 7 1 33.63 17.96 0
 -19 7 -1 2.58 20.54 0
 -19 -7 -1 17.3 16.69 0
 19 -7 1 0.86 21.56 0
 -19 7 -1 7.89 21.8 0
 19 -7 1 -2.75 21.28 0
 19 7 1 6.89 16.89 0
 -19 -7 -1 -10.65 17.15 0
 19 7 1 9.43 16.22 0
 -21 -7 -1 124.76 17.82 0
 -21 7 -1 110.4 20.6 0
 21 7 1 102.31 16.42 0
 21 7 1 105.22 17.08 0
 -21 7 -1 130.46 26.24 0
 -21 -7 -1 117.96 17.11 0
 21 -7 1 113.79 21.1 0
 21 -7 1 92.55 21.2 0
 -23 7 -1 0.8 19 0
 23 -7 1 7.14 20.56 0
 -23 -7 -1 15.2 16 0
 -23 7 -1 -2.07 20.66 0
 23 7 1 11.97 15.18 0
 -23 -7 -1 -15.76 15.86 0
 23 -7 1 7.82 20.02 0
 23 7 1 22 15.77 0
 -25 -7 -1 41.01 15.31 0
 -25 -7 -1 55.05 15.64 0
 -25 7 -1 56.84 20.8 0
 25 -7 1 49.82 20.12 0
 25 -7 1 53.45 19.96 0
 25 7 1 22.24 15.68 0
 25 7 1 42.98 11.08 0
 -25 7 -1 43.5 15.94 0
 -27 7 -1 6.4 19.17 0
 27 7 1 22.01 14.78 0
 27 -7 1 -0.52 20.23 0
 -27 -7 -1 10.86 15.08 0
 -27 7 -1 7.21 20 0
 27 -7 1 11 19.23 0
 27 7 1 10.08 14.9 0
 -27 -7 -1 4.82 10.74 0
 29 7 1 20.31 14.5 0
 29 -7 1 24.63 15.91 0
 -29 7 -1 23.23 16.56 0
 -29 7 -1 19.74 18.31 0
 29 -7 1 20.19 15.86 0
 -29 -7 -1 31.58 14.75 0
 29 7 1 41.39 14.15 0
 -29 -7 -1 30.42 15.56 0
 28 -8 -1 92.09 20.72 0
 -28 -8 1 107.41 15.61 0
 -28 8 1 111.54 20.89 0
 28 8 -1 62.48 15.45 0
 28 -8 -1 80.69 23.2 0
 -28 8 1 77.91 18.75 0
 -28 -8 1 81.84 16.07 0
 28 8 -1 85.82 15.65 0
 -26 -8 1 18.2 15.53 0
 -26 8 1 3.05 21.13 0
 26 8 -1 18.71 15.48 0
 -26 8 1 7.46 23.48 0
 26 -8 -1 2.61 22.71 0
 26 8 -1 13.63 14.82 0
 26 -8 -1 2.11 19.5 0
 -26 -8 1 5.45 10.63 0
 -24 -8 1 15.4 15.59 0
 24 -8 -1 5.38 22.62 0
 -24 -8 1 15.7 15.4 0
 24 8 -1 12.15 15.64 0
 24 8 -1 4.47 10.41 0
 -24 8 1 -0.18 22.81 0
 24 -8 -1 -2.95 24.74 0
 -24 8 1 6.63 20.63 0
 22 8 -1 21.68 15.78 0
 -22 8 1 18.49 26.27 0
 22 8 -1 13.07 15.57 0
 -22 8 1 6.55 25.22 0
 -22 -8 1 15.81 15.58 0
 22 -8 -1 15.07 25.33 0
 22 -8 -1 12.69 26.72 0
 -22 -8 1 7.37 16.1 0
 -20 -8 1 -0.42 16.51 0
 20 8 -1 -20.11 17.65 0
 20 -8 -1 2.18 30.65 0
 20 8 -1 -6.35 16.76 0
 -20 8 1 -0.36 30.84 0
 -20 -8 1 2.06 17.61 0
 20 -8 -1 9.27 34.09 0
 -20 8 1 -1.89 29.74 0
 -18 -8 1 135.08 18.36 0
 18 8 -1 109.59 17.33 0
 -18 -8 1 110.31 17.77 0
 18 8 -1 104.76 16.77 0
 18 -8 -1 1.57 12.06 0
 -16 -8 1 83.47 17.45 0
 16 8 -1 87.01 17.51 0
 16 8 -1 95.38 17.75 0
 -16 -8 1 81.93 17.95 0
 -14 -8 1 160.61 18.96 0
 14 8 -1 167.58 17.77 0
 -14 -8 1 142.91 17.55 0
 14 8 -1 159.32 18.33 0
 12 8 -1 142.04 17.96 0
 -12 -8 1 113.58 17.83 0
 12 8 -1 116.92 18.45 0
 -12 -8 1 133.14 18.05 0
 10 8 -1 40.81 17.02 0
 -10 -8 1 49.75 18 0
 10 8 -1 45.42 17.47 0
 -10 -8 1 51.4 16.42 0
 8 8 -1 48.07 17.25 0
 -8 -8 1 36.83 18.28 0
 8 8 -1 52.09 18.55 0
 -6 -8 1 13.77 16.57 0
 -6 -8 1 24.26 23.25 0
 6 8 -1 29.21 22.81 0
 6 8 -1 16.84 22.17 0
 -4 -8 1 25.78 18.91 0
 4 8 -1 47.69 23.08 0
 -4 -8 1 33.87 17.65 0
 4 8 -1 32.49 21.51 0
 -2 -8 1 77.29 21.68 0
 -2 8 1 65.43 24.11 0
 2 8 -1 86.2 21.47 0
 2 8 -1 70.99 23.53 0
 -2 8 1 71.79 29.34 0
 2 -8 -1 69.26 27.31 0
 2 -8 -1 69.64 30.59 0
 -2 -8 1 65.26 23.89 0
 0 -8 1 142.55 27.38 0
 0 8 -1 143.81 21.47 0
 0 8 -1 130.07 23.62 0
 0 -8 -1 133.48 24.94 0
 0 -8 -1 134.75 24.47 0
 0 8 1 133.33 27.18 0
 0 8 1 133.04 21.86 0
 0 -8 1 136.39 21.74 0
 2 8 1 73.62 23.01 0
 -2 8 -1 70.8 26.32 0
 -2 -8 -1 66.27 21.29 0
 -2 -8 -1 83.01 26.69 0
 2 -8 1 81.47 27.39 0
 2 -8 1 71.43 25.14 0
 2 8 1 77.85 21.55 0
 -2 8 -1 64.41 24.05 0
 4 -8 1 26.91 28.01 0
 -4 -8 -1 25.66 18.94 0
 4 -8 1 24.36 29.71 0
 -4 8 -1 26.56 25.75 0
 4 8 1 28.87 21.65 0
 -4 8 -1 24.43 27.53 0
 4 8 1 36.87 23.32 0
 6 -8 1 27.15 32.42 0
 -6 8 -1 27.99 30.72 0
 -6 -8 -1 12.08 18.7 0
 6 -8 1 25.98 34.85 0
 -6 8 -1 28.1 31.78 0
 6 8 1 24.35 17.74 0
 -6 -8 -1 35.09 21.67 0
 6 8 1 28.07 17.98 0
 8 -8 1 46.9 38.02 0
 8 8 1 62.9 17.01 0
 8 -8 1 35.64 37.36 0
 -8 -8 -1 37.79 22.07 0
 -8 -8 -1 37.86 17.43 0
 -8 8 -1 43.83 36.31 0
 8 8 1 39.15 22.05 0
 -8 8 -1 44.31 36.57 0
 10 8 1 95.2 18.47 0
 10 -8 1 76.58 40.25 0
 -10 8 -1 71.56 40 0
 10 -8 1 90.22 40.85 0
 -10 -8 -1 87.11 21.53 0
 -10 8 -1 85.56 36.79 0
 10 8 1 91.24 17.09 0
 -10 -8 -1 86.01 17.15 0
 -12 -8 -1 48.27 17.46 0
 -12 8 -1 28.17 33.85 0
 -12 -8 -1 13.61 16.83 0
 12 8 1 30.49 17.22 0
 12 -8 1 29.54 34.51 0
 12 8 1 43.54 21.51 0
 12 -8 1 27.22 34.33 0
 -12 8 -1 21.97 32.56 0
 -14 -8 -1 12.19 16.93 0
 -14 -8 -1 7.27 17.46 0
 -14 8 -1 6.06 25.69 0
 14 -8 1 11.03 29.8 0
 14 8 1 0.36 16.8 0
 14 -8 1 5.91 30.28 0
 -14 8 -1 3.71 29.16 0
 14 8 1 12.15 17.14 0
 16 8 1 14.06 16.65 0
 -16 -8 -1 3.82 16.56 0
 -16 -8 -1 -8.75 16.72 0
 -16 8 -1 6.2 25.51 0
 16 8 1 -3.95 17.07 0
 16 -8 1 7.42 26.58 0
 -16 8 -1 4 24.74 0
 16 -8 1 3.77 25.86 0
 -18 8 -1 15.92 25.04 0
 18 -8 1 14.82 22.86 0
 18 8 1 12.65 16.17 0
 -18 8 -1 21.95 23.84 0
 -18 -8 -1 20.84 20.17 0
 18 8 1 12.13 16.21 0
 18 -8 1 18.18 23.85 0
 -18 -8 -1 20.04 17.44 0
 20 -8 1 -5.21 21.46 0
 -20 8 -1 -0.15 24.31 0
 20 8 1 10.45 16.78 0
 -20 -8 -1 -6.45 16.63 0
 20 -8 1 3.8 23.09 0
 -20 8 -1 6.48 23.21 0
 -20 -8 -1 13.96 16.76 0
 20 8 1 -4.68 16.65 0
 -22 -8 -1 7.62 15.85 0
 -22 8 -1 9.51 20.72 0
 22 8 1 24.98 16.42 0
 22 8 1 0.84 15.52 0
 22 -8 1 -1.53 20.26 0
 -22 -8 -1 9.21 15.73 0
 -22 8 -1 10.32 22.54 0
 22 -8 1 7.73 22.77 0
 -24 -8 -1 113.3 15.97 0
 -24 8 -1 78.7 21.63 0
 24 -8 1 77.53 22.76 0
 24 -8 1 81.99 19.63 0
 -24 -8 -1 105.5 16.98 0
 -24 8 -1 91.41 23.64 0
 24 8 1 98.86 16.32 0
 24 8 1 73.06 11.24 0
 -26 -8 -1 5.62 15.21 0
 26 8 1 14.52 10.73 0
 -26 -8 -1 -2.21 15.16 0
 -26 8 -1 1.17 18.1 0
 26 8 1 1.19 15.15 0
 -26 8 -1 11.37 19.67 0
 26 -8 1 -2.78 19.58 0
 26 -8 1 3.2 19.67 0
 28 -8 1 28.59 19.64 0
 28 8 1 34.29 10.76 0
 28 8 1 34.47 15 0
 -28 -8 -1 32.45 15.54 0
 -28 8 -1 29.65 18.75 0
 -28 8 -1 48 20.6 0
 -28 -8 -1 29.7 14.38 0
 28 -8 1 27.28 20.07 0
 27 9 -1 56.76 14.95 0
 -27 -9 1 69.4 11.49 0
 27 9 -1 71.88 15.14 0
 -27 9 1 1.69 25.13 0
 27 -9 -1 58.92 31.67 0
 27 -9 -1 60.12 28.96 0
 -27 -9 1 66.51 11.1 0
 25 9 -1 10.41 15.86 0
 25 9 -1 13.84 15.25 0
 -25 -9 1 17.84 14.94 0
 -25 -9 1 37.06 15.91 0
 -23 -9 1 8.87 15.77 0
 -23 -9 1 14.02 15.82 0
 23 9 -1 23.2 15.44 0
 23 9 -1 11.58 15.35 0
 -21 -9 1 6.35 15.72 0
 21 9 -1 1.9 15.53 0
 -21 -9 1 0.47 15.58 0
 21 9 -1 6.87 11.24 0
 -19 -9 1 48.2 17.19 0
 -19 -9 1 33.43 11.97 0
 19 9 -1 41.74 15.32 0
 19 9 -1 49.78 16.44 0
 -17 -9 1 93.24 19.72 0
 -17 -9 1 75.66 15.93 0
 17 9 -1 99.46 16.34 0
 17 9 -1 75.46 16.99 0
 -15 -9 1 17.4 15.99 0
 -15 -9 1 11.98 16.22 0
 15 9 -1 7.98 15.71 0
 15 9 -1 -5.53 16.12 0
 -13 -9 1 0.77 16.56 0
 13 9 -1 4.82 15.59 0
 -13 -9 1 3.94 15.36 0
 13 9 -1 13.94 16.68 0
 -11 -9 1 132.54 21.36 0
 11 9 -1 135.39 17.1 0
 11 9 -1 143.02 17.28 0
 9 9 -1 7.1 16.93 0
 -9 -9 1 21.16 20.95 0
 -9 -9 1 17.34 20.06 0
 9 9 -1 19.93 19.94 0
 -7 -9 1 138.29 16.89 0
 -7 -9 1 140.88 22.59 0
 7 9 -1 141.71 20.13 0
 7 9 -1 146.02 22.13 0
 5 9 -1 -5.74 23.64 0
 -5 -9 1 9.23 21.35 0
 5 9 -1 3.5 22.1 0
 -5 -9 1 -3.91 19.36 0
 3 9 -1 9.55 20.94 0
 -3 -9 1 4.73 23.55 0
 -3 -9 1 13.95 21.35 0
 -3 9 1 9.25 47.22 0
 3 9 -1 10.7 23.42 0
 1 -9 -1 99.48 30.72 0
 -1 9 1 90.98 26.94 0
 -1 9 1 96.08 29.34 0
 1 9 -1 92.92 25.58 0
 1 9 -1 95.76 24.82 0
 -1 -9 1 111.65 22.84 0
 1 -9 -1 107.64 26.92 0
 -1 -9 1 96.65 25.16 0
 1 9 1 37.65 22.83 0
 -1 9 -1 43.15 25.64 0
 1 -9 1 33.29 23.07 0
 -1 -9 -1 39.34 21.13 0
 -1 9 -1 39.04 23.26 0
 1 9 1 36.76 24.49 0
 1 -9 1 39.39 23.63 0
 -1 -9 -1 37.98 27.18 0
 3 9 1 20.48 21.83 0
 3 -9 1 3.06 26.5 0
 -3 -9 -1 -2.62 21.52 0
 3 -9 1 8.06 29.19 0
 3 9 1 -9.68 23.35 0
 -3 9 -1 8.17 26.21 0
 -3 9 -1 6.55 27.23 0
 -3 -9 -1 6.22 23.78 0
 5 -9 1 82.85 34.02 0
 -5 -9 -1 60.47 22.21 0
 5 9 1 69.68 19.4 0
 5 9 1 82.07 21.97 0
 5 -9 1 68.02 37.38 0
 -5 9 -1 79.31 36.33 0
 -5 -9 -1 75.97 23.71 0
 -5 9 -1 63.13 32.69 0
 -7 -9 -1 -10.67 21.01 0
 -7 -9 -1 8.42 16.9 0
 7 9 1 6.06 22.16 0
 7 9 1 11.14 18.37 0
 -9 -9 -1 32.19 17.76 0
 -9 -9 -1 26.58 18.5 0
 9 9 1 29.58 16.6 0
 9 9 1 27.11 17.03 0
 11 9 1 31.73 21.09 0
 11 9 1 43.56 20.16 0
 -11 -9 -1 30.17 15.96 0
 -11 -9 -1 35.62 17.3 0
 13 9 1 15.56 21.12 0
 -13 -9 -1 13.35 16.93 0
 13 9 1 1.6 15.8 0
 -13 -9 -1 -0.46 16 0
 15 9 1 4.97 15.92 0
 -15 -9 -1 7.29 15.72 0
 -15 -9 -1 3.94 15.7 0
 15 9 1 8.41 15.2 0
 -17 -9 -1 18.87 16.39 0
 17 9 1 21.04 15.49 0
 -17 -9 -1 16.53 15.95 0
 17 9 1 11.39 15.91 0
 -19 -9 -1 32.06 16.34 0
 -19 -9 -1 9.97 16.22 0
 19 -9 1 21.21 32.05 0
 19 9 1 20.11 15.78 0
 -19 9 -1 20.38 31.79 0
 -19 9 -1 19.54 31.09 0
 19 -9 1 17.08 34.27 0
 19 9 1 26.43 15.94 0
 -21 -9 -1 60.07 15.92 0
 -21 9 -1 36.6 26.72 0
 21 9 1 49.25 16.73 0
 21 -9 1 37.79 29.12 0
 -21 -9 -1 43.25 15.87 0
 -21 9 -1 37.22 24.34 0
 21 9 1 45.2 16.41 0
 21 -9 1 45.03 29.2 0
 23 9 1 12.04 15.33 0
 -23 9 -1 2.29 23.75 0
 -23 -9 -1 -0.72 15.57 0
 -23 9 -1 -1.99 24.25 0
 23 -9 1 -2.35 25.77 0
 -23 -9 -1 -7.96 15.11 0
 23 9 1 7.57 15.09 0
 23 -9 1 4 25.21 0
 25 -9 1 5.86 24.51 0
 -25 9 -1 8.79 24.24 0
 -25 -9 -1 0.54 15.48 0
 25 -9 1 2.34 22.1 0
 -25 -9 -1 -20.15 14.13 0
 25 9 1 10.36 15.22 0
 25 9 1 16.39 15.38 0
 -25 9 -1 5.78 22.98 0
 24 10 -1 35.75 16.09 0
 24 10 -1 35.57 15.75 0
 -22 -10 1 19.62 15.87 0
 22 10 -1 12.48 15.1 0
 -22 -10 1 15.05 14.71 0
 22 10 -1 10.36 15.76 0
 -20 -10 1 -13.7 15.91 0
 20 10 -1 5.17 14.86 0
 -20 -10 1 -17.25 16.4 0
 20 10 -1 11.34 15.11 0
 18 10 -1 13.88 14.99 0
 18 10 -1 10.11 15.96 0
 -18 -10 1 15.88 15.74 0
 -18 -10 1 8.73 15.26 0
 -16 -10 1 18.07 16.38 0
 16 10 -1 17.61 15.86 0
 16 10 -1 19.17 16.42 0
 -16 -10 1 21.19 15.52 0
 14 10 -1 4.53 15.95 0
 -14 -10 1 -3.46 16.56 0
 14 10 -1 1.86 16.65 0
 12 10 -1 3.87 15.67 0
 12 10 -1 16.03 16.39 0
 -12 -10 1 18.59 16.24 0
 -12 -10 1 15.95 16.19 0
 10 10 -1 16.24 16.47 0
 -10 -10 1 17.31 20.58 0
 10 10 -1 12.33 15.66 0
 -10 -10 1 -3 20.01 0
 -8 -10 1 -7.74 15.71 0
 8 10 -1 7.47 17.25 0
 8 10 -1 8.9 16.25 0
 -8 -10 1 -6.16 21.11 0
 -6 -10 1 40.91 19.87 0
 -6 -10 1 29.41 21.95 0
 6 10 -1 26.92 21.87 0
 6 10 -1 41.39 20.32 0
 4 10 -1 28.1 22.06 0
 -4 -10 1 31.36 20.32 0
 4 10 -1 31.97 19.94 0
 -4 -10 1 21.97 18.38 0
 2 10 -1 1.27 19.69 0
 -2 -10 1 -1.6 19.15 0
 -2 -10 1 2.11 21.37 0
 2 10 -1 2 18.36 0
 0 -10 -1 41.21 24.94 0
 0 10 -1 34.33 23.43 0
 0 10 1 43.41 24.37 0
 0 -10 1 39.32 21.25 0
 0 -10 -1 35.9 24.03 0
 0 -10 1 38.47 21.59 0
 0 10 -1 34.11 18.73 0
 0 10 1 40.85 25.81 0
 2 10 1 4.24 23.21 0
 2 10 1 -3.6 18.45 0
 -2 10 -1 5.04 26.58 0
 -2 10 -1 2.66 24.5 0
 2 -10 1 12.05 29.63 0
 2 -10 1 2.34 26.23 0
 -2 -10 -1 0.04 21.35 0
 -2 -10 -1 -3.12 20.79 0
 4 10 1 5.15 20.89 0
 -4 10 -1 0.72 41.46 0
 -4 10 -1 -0.55 42.38 0
 -4 -10 -1 10.46 20.89 0
 -4 -10 -1 -7.43 21.83 0
 4 10 1 2.22 20.07 0
 6 10 1 22.71 21.15 0
 6 10 1 17.87 19.82 0
 -6 -10 -1 20.81 16.14 0
 -6 -10 -1 11.9 20.84 0
 -8 -10 -1 12.98 21.23 0
 -8 -10 -1 3.84 19.61 0
 8 10 1 5.38 15.91 0
 8 10 1 10.27 17.4 0
 10 10 1 38.85 19.97 0
 -10 -10 -1 26.22 16.08 0
 10 10 1 30.18 15.63 0
 -10 -10 -1 3.59 16.7 0
 12 10 1 18.29 17.04 0
 12 10 1 19.35 15.83 0
 -12 -10 -1 4.26 19.73 0
 -12 -10 -1 -9.25 21.03 0
 14 10 1 17.49 15.75 0
 14 10 1 6.7 15.59 0
 -14 -10 -1 -7.31 15.33 0
 -14 -10 -1 13.45 15.79 0
 -16 -10 -1 13.93 19.23 0
 16 10 1 0.75 15.82 0
 16 10 1 7.19 14.68 0
 -16 -10 -1 5.46 15.48 0
 -18 -10 -1 14.98 16.04 0
 -18 -10 -1 19.49 16.61 0
 18 10 1 3.51 16.5 0
 18 10 1 14.74 15.63 0
 20 10 1 22.22 14.98 0
 -20 -10 -1 9.05 15.92 0
 -20 -10 -1 10.56 15.99 0
 20 10 1 9.27 16.05 0
 -22 -10 -1 7.57 16.39 0
 -22 -10 -1 11 15.33 0
 22 10 1 1.8 15.79 0
 22 10 1 16.44 15.22 0
 -19 -11 1 3.91 15.73 0
 19 11 -1 2.48 15.77 0
 19 11 -1 16.81 15.98 0
 17 11 -1 -0.65 16.02 0
 -17 -11 1 28.09 19.4 0
 17 11 -1 14.06 15.2 0
 -15 -11 1 13.02 15.6 0
 -15 -11 1 3.61 16.67 0
 15 11 -1 19.62 14.74 0
 15 11 -1 24.14 16.59 0
 13 11 -1 -16.3 18.05 0
 -13 -11 1 12.16 15.52 0
 13 11 -1 11.48 20.25 0
 -13 -11 1 -4.24 15.82 0
 -11 -11 1 9.61 17.39 0
 -11 -11 1 0.85 14.95 0
 11 11 -1 7.51 19.38 0
 11 11 -1 8.06 21.37 0
 9 11 -1 10.97 16.5 0
 -9 -11 1 18.01 19.03 0
 9 11 -1 3.78 19.05 0
 -9 -11 1 -11.17 21.29 0
 7 11 -1 10.38 20.21 0
 -7 -11 1 10.02 18.76 0
 7 11 -1 12.76 18.32 0
 -7 -11 1 11.32 20.45 0
 -5 -11 1 11.16 20.86 0
 5 11 -1 7.1 20.36 0
 5 11 -1 11.69 19.08 0
 -5 -11 1 0.02 19.04 0
 3 11 -1 59.71 22.41 0
 -3 -11 1 60.47 21.14 0
 -3 -11 1 63.35 19.47 0
 3 11 -1 64.83 24.5 0
 -1 -11 1 9.89 24.67 0
 -1 -11 1 19.01 24.27 0
 1 11 -1 15.33 23.13 0
 1 11 -1 3.66 21.1 0
 -1 -11 -1 13.52 28.36 0
 1 -11 1 3.75 27.27 0
 1 -11 1 6.84 29 0
 -1 11 -1 6.42 26.21 0
 -1 -11 -1 8.87 23.71 0
 1 11 1 3.61 20.33 0
 1 11 1 6.8 25.34 0
 -1 11 -1 4.28 27.69 0
 3 11 1 0.17 23.94 0
 3 11 1 -4.06 22.46 0
 -3 -11 -1 2.97 22.26 0
 -3 -11 -1 1.84 24.08 0
 5 11 1 41.57 20.89 0
 -5 -11 -1 39.86 21.34 0
 5 11 1 35.36 16.15 0
 -5 -11 -1 41.41 18.91 0
 -7 -11 -1 22.54 20.81 0
 -7 -11 -1 13.07 15.73 0
 7 11 1 16.68 19.09 0
 7 11 1 13.25 20.61 0
 -9 -11 -1 8 20.27 0
 9 11 1 4.28 21.77 0
 -9 -11 -1 10.08 17.93 0
 9 11 1 6.89 20.39 0
 -11 -11 -1 -0.61 21.07 0
 11 11 1 3.31 19.97 0
 11 11 1 15.91 16.65 0
 -11 -11 -1 -1.77 15.21 0
 -13 -11 -1 16.54 20.57 0
 13 11 1 19.75 15.77 0
 13 11 1 21.08 16.21 0
 15 11 1 5.82 19.86 0
 -15 -11 -1 6.33 16.04 0
 -15 -11 -1 3.92 19.15 0
 15 11 1 -5.42 16.09 0
 17 11 1 12.98 15.37 0
 -17 -11 -1 38.52 19.77 0
 17 11 1 8.74 15.85 0
 -17 -11 -1 10.51 15.73 0
 14 12 -1 11.13 20.78 0
 14 12 -1 -3.94 14.52 0
 12 12 -1 13.07 15.09 0
 -12 -12 1 2.31 18.26 0
 12 12 -1 11.71 16.35 0
 -12 -12 1 6.56 16.55 0
 -10 -12 1 11.96 15.07 0
 10 12 -1 19.03 16.19 0
 10 12 -1 11.24 15.27 0
 -10 -12 1 10.43 20.13 0
 8 12 -1 18.2 20.52 0
 -8 -12 1 22.24 16.85 0
 -8 -12 1 25.76 18.63 0
 8 12 -1 29.59 19.07 0
 6 12 -1 14.84 20.49 0
 6 12 -1 13.36 18.21 0
 -6 -12 1 5.79 20.08 0
 -6 -12 1 12.58 18.66 0
 4 12 -1 3.14 19.01 0
 4 12 -1 2.11 22.76 0
 -4 -12 1 -3.61 21.22 0
 -4 -12 1 -4.74 19.17 0
 2 12 -1 9.51 22.91 0
 -2 -12 1 5.79 21.71 0
 2 12 -1 7.9 22.73 0
 -2 -12 1 7.05 26.96 0
 0 12 -1 1.4 30.6 0
 0 12 -1 2.16 28.49 0
 0 -12 1 0.54 32.34 0
 0 -12 1 5.63 35.04 0
 2 12 1 29.69 24.8 0
 2 12 1 24.87 24.28 0
 -2 -12 -1 29.34 27.97 0
 -2 -12 -1 31.73 26.93 0
 -4 -12 -1 2.02 22.03 0
 4 12 1 -2.45 21.68 0
 -4 -12 -1 5.82 23.03 0
 4 12 1 3.64 22.82 0
 -6 -12 -1 4.44 18.98 0
 -6 -12 -1 14.31 19.81 0
 6 12 1 9.67 19.34 0
 6 12 1 2.59 18.55 0
 -8 -12 -1 -2.2 18.53 0
 -8 -12 -1 3.01 19.95 0
 8 12 1 4.65 19.32 0
 8 12 1 5 15.71 0
 10 12 1 40.6 19.77 0
 -10 -12 -1 25.3 17.06 0
 -10 -12 -1 31.5 19.62 0
 10 12 1 31.77 15.59 0
 12 12 1 12.3 15.68 0
 -12 -12 -1 2.91 16.04 0
 12 12 1 -1.34 20.31 0
 -12 -12 -1 10.02 20.5 0
 38 0 -2 63.1 15.74 0
 38 0 -2 71.86 14.53 0
 -38 0 2 91.06 12.05 0
 -38 0 2 99.57 15.4 0
 -36 0 2 53.89 15.55 0
 36 0 -2 55.47 15.08 0
 36 0 -2 37.89 15.04 0
 -36 0 2 63.09 14.69 0
 -34 0 2 0.1 15.32 0
 -34 0 2 16.49 15.49 0
 34 0 -2 13.67 14.87 0
 34 0 -2 36.11 14.57 0
 32 0 -2 240.82 17.61 0
 -32 0 2 237.19 12.87 0
 -32 0 2 305.82 18.03 0
 32 0 -2 289.2 16.74 0
 -30 0 2 43.12 16.71 0
 -30 0 2 44.33 15.73 0
 30 0 -2 28.45 15.89 0
 30 0 -2 26.89 15.83 0
 28 0 -2 173 16.88 0
 28 0 -2 151.77 16.05 0
 -28 0 2 179.86 17.44 0
 -28 0 2 198.37 18.18 0
 -26 0 2 566.62 15.16 0
 -26 0 2 717.14 21.13 0
 26 0 -2 602.49 19.45 0
 26 0 -2 643.31 20.36 0
 -24 0 2 67.39 18.07 0
 24 0 -2 51.58 17.26 0
 -24 0 2 66.9 17.68 0
 24 0 -2 72.58 17.42 0
 22 0 -2 84.96 19.3 0
 -22 0 2 99.74 19.4 0
 22 0 -2 81.73 19.31 0
 -22 0 2 115.32 19.92 0
 20 0 -2 31.32 18.76 0
 20 0 -2 17.15 19.46 0
 -20 0 2 27.19 19.16 0
 -20 0 2 31.5 19.59 0
 18 0 -2 843.86 19.95 0
 18 0 -2 996.13 25.52 0
 -18 0 2 983.34 25.77 0
 -18 0 2 1021.47 25.77 0
 -16 0 2 98.24 23 0
 16 0 -2 87.36 17.31 0
 -16 0 2 79.53 23.23 0
 16 0 -2 101.33 22.81 0
 14 0 -2 17.16 26.58 0
 14 0 -2 26.67 26.17 0
 -14 0 2 8.09 26.81 0
 -14 0 2 14.64 25.56 0
 -12 0 2 374.17 21.3 0
 12 0 -2 389.84 29.02 0
 12 0 -2 333.77 28.63 0
 -12 0 2 355.68 21.84 0
 10 0 -2 2.47 28.34 0
 10 0 -2 4.7 28.7 0
 -10 0 2 2.09 28.13 0
 -10 0 2 -4.04 29.07 0
 8 0 -2 625.71 40.2 0
 -8 0 2 625.63 40.03 0
 -8 0 2 685.79 40.68 0
 8 0 -2 661.48 40.07 0
 6 0 -2 2936.55 59.59 0
 -6 0 2 3121.08 60.6 0
 6 0 -2 2929.06 52.13 0
 -6 0 2 2920.18 60.46 0
 -4 0 2 158.99 46.94 0
 4 0 -2 157.74 43.46 0
 4 0 -2 166.99 43.06 0
 -4 0 2 161.46 43.46 0
 2 0 2 17.8 42.34 0
 2 0 2 16.81 43.88 0
 -2 0 -2 -2.61 42.75 0
 -2 0 -2 26.47 43.54 0
 -4 0 -2 807.5 49 0
 4 0 2 859.65 49.12 0
 -4 0 -2 947.24 51.01 0
 4 0 2 855.05 51.32 0
 -6 0 -2 15.7 38.13 0
 -6 0 -2 24.41 35.86 0
 6 0 2 8.36 36.57 0
 6 0 2 35.93 36.82 0
 -8 0 -2 809.09 33.59 0
 -8 0 -2 916.7 35.23 0
 8 0 2 857.49 34.43 0
 8 0 2 784.52 34.25 0
 -10 0 -2 11.1 27.97 0
 -10 0 -2 5 28.1 0
 10 0 2 3.38 27.4 0
 10 0 2 -6.31 28.15 0
 12 0 2 1865.13 34.73 0
 -12 0 -2 2127.73 35.9 0
 12 0 2 2091.55 35.91 0
 -12 0 -2 1908.86 34.51 0
 14 0 2 15.3 24.25 0
 -14 0 -2 0.38 23.81 0
 14 0 2 4.21 23.59 0
 -14 0 -2 20.47 23.84 0
 16 0 2 96.31 20.54 0
 -16 0 -2 98.17 19.81 0
 -16 0 -2 114.86 20.72 0
 16 0 2 99.88 21.12 0
 18 0 2 331.2 21.21 0
 18 0 2 314.76 20.33 0
 -18 0 -2 343.38 20.57 0
 -18 0 -2 377.38 21.83 0
 -20 0 -2 327.48 20.1 0
 20 0 2 336.9 15.67 0
 -20 0 -2 395.34 21.63 0
 20 0 2 305.61 20.12 0
 -22 0 -2 10.01 18.54 0
 22 0 2 4.03 18.01 0
 -22 0 -2 23.88 17.55 0
 22 0 2 9.83 17.43 0
 -24 0 -2 329.61 18.81 0
 -24 0 -2 289.48 17.44 0
 24 0 2 275.75 18.73 0
 24 0 2 252.35 17.22 0
 -26 0 -2 262.85 16.53 0
 26 0 2 277.7 16.79 0
 26 0 2 275.09 17.08 0
 -26 0 -2 290.17 13.36 0
 -28 0 -2 59.12 15.78 0
 28 0 2 51.16 10.94 0
 28 0 2 67.11 16.12 0
 -28 0 -2 68.22 15.78 0
 -30 0 -2 163.95 15.37 0
 30 0 2 162.96 16.28 0
 -30 0 -2 144.14 11.64 0
 30 0 2 153.11 16.03 0
 32 0 2 344.62 16.8 0
 32 0 2 389.11 17.01 0
 -32 0 -2 433.31 18.36 0
 -32 0 -2 411.61 16.79 0
 34 0 2 376.87 15.95 0
 34 0 2 304.01 12.86 0
 -34 0 -2 413.61 16.92 0
 -34 0 -2 365.83 16.37 0
 -36 0 -2 15.72 15.14 0
 36 0 2 19.47 14.56 0
 36 0 2 27.56 14.7 0
 -36 0 -2 28.55 14.33 0
 -37 -1 2 -1.05 14.9 0
 37 1 -2 -12.19 14.17 0
 -37 -1 2 6.64 14.71 0
 -37 1 2 8.2 14.97 0
 -37 1 2 10.81 14.98 0
 37 -1 -2 -0.25 14.83 0
 37 1 -2 4.21 14.48 0
 37 -1 -2 18.24 15.32 0
 35 1 -2 89.22 15.26 0
 -35 -1 2 69.18 11.29 0
 35 1 -2 71.76 15.31 0
 -35 -1 2 78.43 15.14 0
 -35 1 2 74.8 16.36 0
 35 -1 -2 77.46 14.91 0
 -35 1 2 77.88 14.3 0
 35 -1 -2 58.09 14.91 0
 33 1 -2 69.18 14.17 0
 -33 -1 2 47.2 15.13 0
 33 1 -2 57.14 14.77 0
 -33 1 2 65.68 15.62 0
 -33 1 2 55.04 15.72 0
 -33 -1 2 44.36 14.52 0
 33 -1 -2 48.48 15.7 0
 33 -1 -2 60.3 15.52 0
 -31 -1 2 3 15.49 0
 31 1 -2 9.78 16.17 0
 31 1 -2 5.39 15.88 0
 -31 1 2 9.06 12.73 0
 31 -1 -2 5.1 17.1 0
 -31 -1 2 -4.11 15.29 0
 31 -1 -2 1.1 16.76 0
 -31 1 2 15.39 16.11 0
 29 -1 -2 70.74 12.12 0
 29 1 -2 82.95 15.74 0
 -29 -1 2 107.25 17.46 0
 29 -1 -2 96.55 16.89 0
 -29 -1 2 88.37 16.59 0
 -29 1 2 100.82 18.39 0
 29 1 -2 86.67 15.63 0
 -29 1 2 89.19 16.34 0
 27 1 -2 5.19 16.66 0
 -27 1 2 2.25 16.57 0
 -27 1 2 2.95 17.23 0
 27 -1 -2 11.09 17.09 0
 -27 -1 2 -1.59 11.37 0
 -27 -1 2 12 16.1 0
 27 1 -2 11.89 16.44 0
 27 -1 -2 -9.18 17.4 0
 -25 1 2 94.86 20.03 0
 -25 -1 2 103.3 17.9 0
 25 1 -2 80.65 17.44 0
 25 1 -2 74.04 18.01 0
 -25 1 2 80.66 18.64 0
 25 -1 -2 68.69 18.65 0
 25 -1 -2 80.49 18.11 0
 -25 -1 2 87.84 17.74 0
 23 1 -2 204.78 19.09 0
 23 -1 -2 201.76 18.52 0
 -23 -1 2 251.98 19.28 0
 23 1 -2 257.19 18.91 0
 -23 -1 2 255.49 19.38 0
 -23 1 2 249.9 18.64 0
 23 -1 -2 232.08 19.38 0
 -23 1 2 255.91 19.46 0
 -21 -1 2 196.13 14.03 0
 21 1 -2 199.09 18.53 0
 -21 -1 2 224.35 14.28 0
 -21 1 2 212.48 19.15 0
 21 -1 -2 204.47 18.14 0
 -21 1 2 226.86 18.6 0
 21 -1 -2 191.08 18.66 0
 21 1 -2 209.72 19.42 0
 19 1 -2 425.64 20.95 0
 -19 -1 2 435.4 21.51 0
 -19 1 2 461.74 21.41 0
 19 -1 -2 427.09 21.02 0
 -19 -1 2 489.12 21.7 0
 19 -1 -2 443.74 21.42 0
 19 1 -2 473.55 22.06 0
 -19 1 2 502.97 22.28 0
 17 -1 -2 43.4 21.68 0
 -17 -1 2 34.76 21.43 0
 -17 -1 2 54.74 21.8 0
 17 1 -2 36.92 21.22 0
 -17 1 2 45.74 21.9 0
 17 -1 -2 33.25 21.64 0
 -17 1 2 37.26 22.05 0
 17 1 -2 39.19 15.24 0
 15 1 -2 483.89 27.2 0
 -15 -1 2 514.92 27.97 0
 15 -1 -2 499.49 26.1 0
 15 1 -2 514.83 27.84 0
 -15 1 2 511.08 26.1 0
 -15 1 2 527.92 26.06 0
 15 -1 -2 460.58 25.7 0
 -15 -1 2 480.75 27.21 0
 13 -1 -2 219.54 27.66 0
 -13 -1 2 220.41 29.2 0
 -13 1 2 229.3 28.3 0
 13 1 -2 225.94 28.04 0
 -13 1 2 217.03 27.97 0
 13 -1 -2 200.59 27.7 0
 -13 -1 2 212.03 28.92 0
 13 1 -2 225.34 29.29 0
 11 -1 -2 1284.79 35.2 0
 11 -1 -2 1414.31 35.54 0
 -11 -1 2 1425.89 35.08 0
 11 1 -2 1450.42 34.36 0
 11 1 -2 1292.9 33.95 0
 -11 1 2 1405.79 35.85 0
 -11 -1 2 1534.68 35.3 0
 -11 1 2 1485.23 36.51 0
 -9 -1 2 74.98 29.74 0
 -9 -1 2 74.74 29.67 0
 -9 1 2 89.93 29.31 0
 9 1 -2 60.42 29.51 0
 9 -1 -2 74.02 28.42 0
 9 1 -2 64.83 29.43 0
 9 -1 -2 90.24 29.54 0
 -9 1 2 90.8 30.87 0
 -7 1 2 13.26 38.95 0
 7 1 -2 20.18 38.7 0
 7 -1 -2 11.18 37.79 0
 7 1 -2 3.89 28.06 0
 -7 -1 2 8.16 38.17 0
 -7 1 2 7.69 37.92 0
 -7 -1 2 38.9 39.43 0
 7 -1 -2 5.3 37.29 0
 5 1 -2 1 43.12 0
 5 1 -2 3.86 43.21 0
 -5 1 2 5.51 43.55 0
 5 -1 -2 7.19 42.3 0
 5 -1 -2 1.9 42.35 0
 -5 1 2 15.78 42.92 0
 -5 -1 2 3.35 45.43 0
 -5 -1 2 5.03 30.73 0
 -3 -1 2 415.66 44.46 0
 -3 1 2 386.58 52.6 0
 3 -1 -2 362.18 43.13 0
 -3 1 2 386.43 52.39 0
 3 -1 -2 390.77 51 0
 3 1 -2 385.54 34.31 0
 -3 -1 2 396.65 46.25 0
 3 1 -2 400.59 45.62 0
 1 -1 -2 19.68 38.17 0
 -1 -1 2 11.81 26.47 0
 1 1 -2 8.09 39.35 0
 -1 1 2 13.72 50.59 0
 1 -1 -2 12.7 39.16 0
 -1 1 2 11.58 39.1 0
 -1 -1 2 14.46 40.52 0
 1 1 -2 19.35 40.19 0
 -1 -1 -2 17.05 41.87 0
 -1 1 -2 1.52 39.8 0
 1 -1 2 15.79 38.15 0
 1 1 2 17.37 45.43 0
 -1 1 -2 10.01 40.73 0
 -1 -1 -2 11.59 42.76 0
 1 -1 2 0.13 40.43 0
 1 1 2 4.25 42.87 0
 3 1 2 139.99 44.75 0
 3 -1 2 161.04 42.88 0
 3 -1 2 145.48 41.05 0
 -3 -1 -2 161.37 32.44 0
 -3 -1 -2 136.37 45.32 0
 -3 1 -2 148.56 44.24 0
 3 1 2 152.29 46.08 0
 -3 1 -2 142.29 41.3 0
 5 1 2 82.67 38.89 0
 5 -1 2 94.96 38.42 0
 5 -1 2 95.85 39.57 0
 -5 -1 -2 68.09 38.1 0
 -5 1 -2 89.75 38.71 0
 -5 1 -2 67.66 38.48 0
 -5 -1 -2 73.5 40.79 0
 5 1 2 77.78 38.89 0
 -7 1 -2 1259.22 36.58 0
 -7 -1 -2 1422.47 37.08 0
 -7 -1 -2 1218.39 29.33 0
 7 -1 2 1218.35 36.46 0
 7 -1 2 1326.14 38.01 0
 7 1 2 1325.84 36.97 0
 7 1 2 1269.12 35.78 0
 -7 1 -2 1359.13 38.06 0
 -9 1 -2 12.89 27.99 0
 -9 -1 -2 13.32 27.89 0
 9 1 2 2.28 27 0
 9 -1 2 14.82 27.55 0
 -9 -1 -2 18.85 27.32 0
 9 -1 2 5.14 26.85 0
 -9 1 -2 23.51 26.93 0
 9 1 2 14.44 27.5 0
 11 -1 2 265.96 28.87 0
 -11 1 -2 296.23 29.28 0
 -11 1 -2 278.73 29.16 0
 11 1 2 252.36 21.74 0
 11 -1 2 293.52 29.3 0
 -11 -1 -2 303.23 30.59 0
 -11 -1 -2 281.78 22.3 0
 11 1 2 295.05 30.79 0
 13 1 2 103.19 25.02 0
 13 1 2 123.97 26.85 0
 -13 -1 -2 132.63 25.64 0
 -13 -1 -2 129.74 25.5 0
 13 -1 2 122.95 23.75 0
 13 -1 2 110.29 24.62 0
 -13 1 -2 124.79 17.58 0
 -13 1 -2 103.81 23.73 0
 15 1 2 618.27 23.88 0
 15 -1 2 636.83 24.4 0
 -15 1 -2 681.99 24.42 0
 -15 -1 -2 723 24.32 0
 -15 1 -2 757.29 25.5 0
 15 -1 2 701.49 24.75 0
 -15 -1 -2 695.33 24.38 0
 15 1 2 698.94 24.92 0
 -17 -1 -2 1161.47 25.33 0
 17 -1 2 1032.18 24.33 0
 -17 1 -2 995.01 23.77 0
 17 1 2 1090.46 24.74 0
 -17 1 -2 1095.68 25.62 0
 17 1 2 934.92 24 0
 -17 -1 -2 954.52 19.3 0
 17 -1 2 918.66 24.23 0
 19 1 2 346.05 21.23 0
 -19 1 -2 357.68 20.45 0
 -19 -1 -2 381.02 21.69 0
 -19 1 -2 330.02 20.43 0
 19 -1 2 323.68 19.32 0
 -19 -1 -2 354.47 19.63 0
 19 -1 2 343.01 18.84 0
 19 1 2 318.88 20.03 0
 -21 1 -2 443.91 19.35 0
 21 -1 2 440.61 19.76 0
 21 1 2 481.57 20.81 0
 -21 -1 -2 510.24 21.28 0
 -21 -1 -2 446.73 19.47 0
 21 1 2 421.14 14.93 0
 21 -1 2 405.52 19.27 0
 -21 1 -2 501.35 20.84 0
 -23 -1 -2 3.25 16.61 0
 23 1 2 16.98 16.6 0
 -23 1 -2 16.99 19.13 0
 -23 1 -2 14.24 17.54 0
 23 -1 2 12.43 17.62 0
 23 -1 2 0.81 17.48 0
 23 1 2 1.37 17.02 0
 -23 -1 -2 8.13 17.75 0
 25 1 2 485.03 18.26 0
 -25 -1 -2 591.45 20.28 0
 25 -1 2 479.67 19.55 0
 -25 1 -2 483.05 14.8 0
 25 -1 2 469.67 15.17 0
 25 1 2 493.9 14.53 0
 -25 1 -2 595.83 20.78 0
 -25 -1 -2 478.76 19.05 0
 27 -1 2 418.64 17.37 0
 -27 -1 -2 424.25 19.31 0
 27 1 2 432.76 19.09 0
 27 -1 2 395.78 18.88 0
 -27 1 -2 456.09 13.9 0
 -27 -1 -2 482.24 19.02 0
 27 1 2 400.19 18.93 0
 -27 1 -2 395.76 17.41 0
 -29 -1 -2 196.38 17.2 0
 29 1 2 141.66 11.94 0
 29 -1 2 144.1 16.19 0
 -29 1 -2 210.71 18.8 0
 -29 -1 -2 162.43 16.12 0
 -29 1 -2 161.81 16.45 0
 29 1 2 167.36 15.78 0
 29 -1 2 180.38 17.74 0
 31 -1 2 6.63 15.27 0
 -31 1 -2 8.44 16.15 0
 31 -1 2 12.31 11.32 0
 -31 -1 -2 4.1 9.79 0
 -31 1 -2 7.41 14.45 0
 31 1 2 1.81 10.83 0
 31 1 2 5.07 10.88 0
 -31 -1 -2 3.27 15.75 0
 -33 -1 -2 24.34 14.94 0
 33 1 2 25.31 14.84 0
 33 -1 2 13.89 15.17 0
 -33 1 -2 21.5 11.54 0
 -33 -1 -2 45.81 15.57 0
 33 -1 2 35.78 15.11 0
 -33 1 -2 20.49 14.92 0
 33 1 2 17.79 10.57 0
 -35 -1 -2 144.72 15.74 0
 -35 -1 -2 126.51 15.12 0
 35 -1 2 114.96 14.87 0
 35 -1 2 123.75 15.02 0
 35 1 2 113.6 15.17 0
 -35 1 -2 104.05 15.14 0
 35 1 2 114.73 15.44 0
 -35 1 -2 128.37 16.05 0
 36 -2 -2 408.02 18.01 0
 -36 2 2 533.54 18.74 0
 36 2 -2 377.94 12.59 0
 36 -2 -2 440.1 17.56 0
 -36 2 2 466.18 17.54 0
 -36 -2 2 429.43 13.08 0
 36 2 -2 455.54 16.76 0
 -36 -2 2 524.03 17.44 0
 -34 -2 2 154.98 15.77 0
 34 -2 -2 135.63 16.49 0
 34 -2 -2 161.6 16.11 0
 -34 2 2 152.33 15.5 0
 34 2 -2 153.59 15.82 0
 -34 -2 2 175.14 15.59 0
 34 2 -2 129.12 15.92 0
 -34 2 2 175.22 17.8 0
 -32 -2 2 17.37 15.11 0
 32 2 -2 15.4 14.41 0
 32 2 -2 22.14 14.75 0
 32 -2 -2 -3.7 15.99 0
 -32 2 2 4.28 15.72 0
 -32 -2 2 -16.83 15.85 0
 -32 2 2 5.95 16.23 0
 32 -2 -2 9.33 15.34 0
 -30 -2 2 166.92 17.27 0
 -30 2 2 181.36 17.91 0
 -30 2 2 153.83 16.38 0
 30 2 -2 149.24 16.51 0
 30 -2 -2 145.93 17.13 0
 -30 -2 2 199.68 16.9 0
 30 2 -2 166.45 17.12 0
 30 -2 -2 170.59 16.55 0
 28 -2 -2 965.56 21.4 0
 28 2 -2 831.12 16.29 0
 -28 -2 2 867.22 16.16 0
 -28 2 2 949.02 21.55 0
 -28 -2 2 1054.83 21 0
 -28 2 2 1104.91 23.32 0
 28 -2 -2 842.22 21.11 0
 28 2 -2 973.49 21.01 0
 26 -2 -2 414.99 20.23 0
 26 2 -2 353.32 13.54 0
 -26 2 2 508.94 21.26 0
 26 -2 -2 393.69 19.38 0
 -26 2 2 416.75 19.51 0
 -26 -2 2 461.33 19.02 0
 -26 -2 2 449.35 18.77 0
 26 2 -2 430.03 19.15 0
 -24 -2 2 731.02 21.22 0
 24 -2 -2 681.2 20.98 0
 -24 2 2 654.32 20.5 0
 24 2 -2 661.1 20.16 0
 24 -2 -2 580.65 20.43 0
 24 2 -2 705.14 21.63 0
 -24 2 2 751.14 22.9 0
 -24 -2 2 681.52 20.36 0
 22 -2 -2 183.05 18.35 0
 22 -2 -2 177.8 18.55 0
 -22 2 2 208.16 19.33 0
 -22 2 2 197.23 18.56 0
 22 2 -2 177.5 19.28 0
 22 2 -2 221.38 19.72 0
 -22 -2 2 167.95 19.18 0
 -22 -2 2 200.27 19.61 0
 -20 2 2 99.04 18.29 0
 -20 2 2 121.19 22.8 0
 20 -2 -2 97.67 18.79 0
 20 2 -2 115.65 18.94 0
 20 2 -2 107.2 19.51 0
 20 -2 -2 107.77 18.91 0
 -20 -2 2 115.49 19.95 0
 -20 -2 2 107.51 19.6 0
 18 2 -2 1235.29 24.62 0
 -18 2 2 1260.08 27.33 0
 18 -2 -2 1171.44 26.54 0
 18 -2 -2 1236.04 26.99 0
 -18 2 2 1379.84 27.95 0
 -18 -2 2 1235.71 25.23 0
 18 2 -2 1289.05 24.96 0
 -18 -2 2 1353.02 25.28 0
 -16 2 2 2360.06 34.77 0
 16 -2 -2 2343.96 34.27 0
 16 2 -2 2411.74 30.83 0
 -16 -2 2 2332.71 30.64 0
 16 -2 -2 2137.49 34.07 0
 16 2 -2 2180.36 30.19 0
 -16 2 2 2407.43 34.96 0
 -16 -2 2 2437.23 30.93 0
 -14 2 2 640.5 27.06 0
 14 -2 -2 628.32 28.5 0
 14 2 -2 640.44 28.24 0
 -14 -2 2 607.46 28.59 0
 -14 -2 2 654.46 28.67 0
 14 -2 -2 585.02 26.92 0
 14 2 -2 606.66 27.74 0
 -14 2 2 679.83 28.07 0
 -12 2 2 611.4 30.33 0
 12 2 -2 564.45 30.12 0
 12 -2 -2 532.71 30.66 0
 12 2 -2 610.94 30.34 0
 -12 -2 2 578.65 30.83 0
 12 -2 -2 566.95 29.7 0
 -12 2 2 560.03 29.24 0
 -12 -2 2 597.91 30.82 0
 -10 -2 2 22.51 18.99 0
 10 -2 -2 16.53 25.02 0
 -10 2 2 14.98 30.37 0
 10 2 -2 2.59 25.93 0
 -10 -2 2 5.48 26.49 0
 10 2 -2 8.07 19.4 0
 -10 2 2 13.74 30.71 0
 10 -2 -2 2.74 29.81 0
 8 2 -2 7425.7 59.25 0
 8 -2 -2 7376.68 79.51 0
 8 -2 -2 6891.02 78.8 0
 -8 -2 2 7244.99 58.02 0
 -8 2 2 6752.33 74.45 0
 8 2 -2 7504.81 57.4 0
 -8 2 2 7931.11 82 0
 -8 -2 2 7781.1 59.84 0
 6 -2 -2 1256.27 60.44 0
 -6 -2 2 1535.33 40.08 0
 6 2 -2 1442.76 40.29 0
 6 -2 -2 1479.13 59.46 0
 6 2 -2 1421.51 32.95 0
 -6 2 2 1369.95 59.24 0
 -6 -2 2 1440.28 32.96 0
 -6 2 2 1542.62 57.25 0
 4 2 -2 2265.88 50.7 0
 -4 2 2 2300.84 97 0
 4 2 -2 2416.57 50.53 0
 4 -2 -2 2225.25 96.33 0
 -4 -2 2 2248.2 49.59 0
 -4 -2 2 2330.56 50.24 0
 -4 2 2 1891.99 90.51 0
 4 -2 -2 1846.6 96.69 0
 2 -2 -2 425.45 62.94 0
 -2 2 2 427.09 62.63 0
 2 2 -2 452.01 41.9 0
 -2 2 2 404.02 63.73 0
 2 -2 -2 422.74 59.25 0
 -2 -2 2 480.27 50.22 0
 2 2 -2 460.11 43.67 0
 -2 -2 2 473.97 41.49 0
 0 -2 2 498.94 40.77 0
 0 2 -2 488.15 41.55 0
 0 -2 2 470.35 40.22 0
 0 2 2 489.55 44.27 0
 0 -2 -2 535.63 54.92 0
 0 -2 -2 467.53 53.93 0
 0 2 -2 512.72 40.02 0
 0 2 2 488.16 54.88 0
 2 -2 2 56.29 34.62 0
 -2 2 -2 69.07 43.35 0
 -2 2 -2 60.63 37.16 0
 -2 -2 -2 64.13 40.04 0
 2 2 2 63.72 39.91 0
 2 2 2 65.55 40.18 0
 2 -2 2 70.75 44.52 0
 -2 -2 -2 72.52 48.6 0
 -4 2 -2 3339.68 53.85 0
 -4 -2 -2 2842.46 48.76 0
 -4 2 -2 3004.68 50.98 0
 4 2 2 2920.69 49.57 0
 -4 -2 -2 3176.54 50.46 0
 4 -2 2 3311.78 52.58 0
 4 2 2 3082.03 50.88 0
 4 -2 2 3046.24 51.17 0
 -6 -2 -2 2310.03 42.07 0
 6 -2 2 2482.09 47.34 0
 -6 -2 -2 2573.61 43.56 0
 -6 2 -2 2247.16 41.83 0
 -6 2 -2 2658.57 44.82 0
 6 2 2 2461.84 43.17 0
 6 -2 2 2514.06 43.93 0
 6 2 2 2268.16 41.94 0
 -8 2 -2 330.31 29.71 0
 -8 -2 -2 337 30.2 0
 -8 -2 -2 314.96 29.82 0
 8 -2 2 344.11 29.33 0
 8 2 2 331.15 30.09 0
 -8 2 -2 322.62 28.74 0
 8 -2 2 312.07 28.58 0
 8 2 2 312.34 29.7 0
 10 -2 2 19.01 26.01 0
 10 -2 2 17.59 27.05 0
 -10 2 -2 13.35 27.23 0
 -10 -2 -2 15.37 19.83 0
 10 2 2 10.22 28.23 0
 -10 -2 -2 6.8 28.65 0
 -10 2 -2 2.91 26.33 0
 10 2 2 15.96 19.34 0
 12 -2 2 323.81 25.1 0
 -12 -2 -2 353.07 27.39 0
 12 2 2 308.03 26.42 0
 -12 2 -2 342.82 25.66 0
 -12 2 -2 317.56 24.93 0
 12 -2 2 313.54 25.01 0
 12 2 2 382.17 27.69 0
 -12 -2 -2 299.75 26.8 0
 -14 -2 -2 28.78 21.7 0
 14 -2 2 30.76 21.34 0
 14 2 2 13.38 21.52 0
 14 2 2 27.14 21.85 0
 -14 -2 -2 13.4 21.81 0
 14 -2 2 33.25 21.6 0
 -14 2 -2 26.74 21.82 0
 -14 2 -2 9.53 21.25 0
 16 2 2 398.83 16.2 0
 -16 -2 -2 441.69 21.07 0
 16 -2 2 470.72 21.48 0
 -16 -2 -2 460.48 21.51 0
 -16 2 -2 493.15 22.81 0
 -16 2 -2 448.75 20.57 0
 16 2 2 479.05 21.3 0
 16 -2 2 413.21 20.65 0
 18 -2 2 68.99 18.12 0
 -18 2 -2 55.28 17.35 0
 -18 -2 -2 78.06 19.57 0
 -18 -2 -2 67.76 19.6 0
 18 2 2 53.76 19.44 0
 18 2 2 81.27 19.16 0
 -18 2 -2 63.73 18.16 0
 18 -2 2 68.92 18.07 0
 -20 2 -2 134.35 18.16 0
 -20 -2 -2 159.73 19.41 0
 20 -2 2 135.09 18.15 0
 20 2 2 136.23 18.73 0
 -20 2 -2 165.9 19.32 0
 20 -2 2 133.51 18.32 0
 -20 -2 -2 135.31 13.85 0
 20 2 2 139.17 14.05 0
 22 2 2 23.9 18.43 0
 -22 2 -2 13.33 19.26 0
 22 -2 2 35.52 17.31 0
 22 2 2 15.26 13.04 0
 -22 -2 -2 34.3 19 0
 -22 2 -2 25.09 17.98 0
 22 -2 2 7.09 18.24 0
 -22 -2 -2 10.58 18.44 0
 24 -2 2 34.73 17.57 0
 -24 -2 -2 13.47 11.77 0
 24 -2 2 8.27 16.95 0
 -24 -2 -2 -14.72 17.56 0
 24 2 2 10.5 16.86 0
 -24 2 -2 6.23 15.74 0
 24 2 2 14.48 15.73 0
 -24 2 -2 24.1 18.78 0
 -26 -2 -2 106.57 17.25 0
 -26 2 -2 114.98 17.15 0
 -26 -2 -2 156.04 18.06 0
 26 2 2 107.36 12.15 0
 26 2 2 122.74 17.6 0
 26 -2 2 117.87 17.16 0
 26 -2 2 119.29 17.44 0
 -26 2 -2 147.96 17.79 0
 28 2 2 137.21 16.37 0
 -28 2 -2 122.9 17.53 0
 -28 -2 -2 142.25 16.64 0
 28 -2 2 149.76 17.45 0
 28 -2 2 134.37 17.03 0
 -28 -2 -2 173.43 17.14 0
 -28 2 -2 177.63 17.7 0
 28 2 2 120.83 16.43 0
 30 -2 2 65.12 11.6 0
 -30 -2 -2 85.27 16.12 0
 -30 -2 -2 63.65 11.42 0
 -30 2 -2 65.22 16.29 0
 -30 2 -2 76.14 16.85 0
 30 2 2 71.25 15.26 0
 30 2 2 75.6 15.48 0
 30 -2 2 81.73 16.32 0
 -32 2 -2 -1.13 15.39 0
 -32 -2 -2 16.71 11.29 0
 32 2 2 12.89 15.05 0
 -32 2 -2 1.12 16.29 0
 -32 -2 -2 3.4 15.41 0
 32 -2 2 0.1 15.62 0
 32 2 2 13.81 15.34 0
 32 -2 2 20.69 14.7 0
 -34 2 -2 -1.64 15.1 0
 -34 -2 -2 11.96 9.95 0
 34 2 2 -3.8 14.95 0
 34 -2 2 6.49 15.11 0
 -34 2 -2 -0.85 14.51 0
 34 -2 2 3.69 14.68 0
 34 2 2 -3.72 14.93 0
 -34 -2 -2 9.42 14.71 0
 37 -3 -2 22.61 15.13 0
 -37 3 2 30.06 15.32 0
 -37 -3 2 8.19 14.62 0
 -37 -3 2 9.3 15.35 0
 37 -3 -2 21.38 15.63 0
 37 3 -2 34.1 14.71 0
 -37 3 2 54.3 15.75 0
 37 3 -2 25.85 10.47 0
 -35 3 2 60.08 14.69 0
 35 3 -2 57.42 14.71 0
 -35 -3 2 73.07 14.95 0
 35 -3 -2 52.1 15.78 0
 35 3 -2 55.66 14.36 0
 -35 3 2 66.02 16.84 0
 -35 -3 2 69.25 15.37 0
 35 -3 -2 49.62 15.55 0
 -33 -3 2 14.88 15.97 0
 -33 3 2 33.23 15.44 0
 33 -3 -2 23.04 15.81 0
 -33 3 2 42.88 20.3 0
 33 3 -2 21.87 15.18 0
 33 -3 -2 24.27 15.74 0
 -33 -3 2 44.4 15.85 0
 33 3 -2 17.13 11.04 0
 31 3 -2 115.56 16.62 0
 -31 -3 2 121.63 15.81 0
 31 -3 -2 86.65 15.02 0
 31 3 -2 98.84 11.44 0
 31 -3 -2 99.81 15.93 0
 -31 -3 2 114.01 16.73 0
 -31 3 2 125.18 15.65 0
 -31 3 2 95.9 15.39 0
 29 -3 -2 63.54 16.43 0
 -29 3 2 73.71 16.4 0
 -29 3 2 84.12 17.42 0
 29 -3 -2 56.5 16.22 0
 -29 -3 2 85.96 16.25 0
 29 3 -2 47.11 16.11 0
 29 3 -2 58.92 16.4 0
 -29 -3 2 68.22 16.28 0
 27 -3 -2 75.77 17.23 0
 27 3 -2 81.17 12.1 0
 -27 3 2 85.53 16.51 0
 27 -3 -2 79.12 17.87 0
 27 3 -2 105.8 17.33 0
 -27 -3 2 82.02 17.76 0
 -27 3 2 89.32 18 0
 -27 -3 2 93.77 17.67 0
 25 3 -2 28.05 16.74 0
 -25 -3 2 30.7 12.28 0
 25 -3 -2 18.98 17.14 0
 -25 3 2 47.28 18.54 0
 -25 -3 2 32.7 12.55 0
 25 -3 -2 33.38 17.77 0
 -25 3 2 38.46 17.29 0
 25 3 -2 36.88 17.02 0
 -23 -3 2 177.64 19.15 0
 -23 -3 2 158.83 19.39 0
 23 3 -2 168.06 18.94 0
 -23 3 2 172.39 22.95 0
 23 3 -2 177.22 18.03 0
 23 -3 -2 165.76 19.62 0
 -23 3 2 185.03 20.06 0
 23 -3 -2 172.77 22.65 0
 -21 -3 2 24.56 13.1 0
 21 3 -2 40.08 12.81 0
 21 -3 -2 28.27 18.02 0
 -21 3 2 78.72 22.76 0
 21 3 -2 35.42 18.68 0
 21 -3 -2 37.34 18.39 0
 -21 3 2 35.24 17.22 0
 -21 -3 2 57.86 18.8 0
 19 3 -2 17.99 18.59 0
 19 3 -2 6.09 18.66 0
 -19 -3 2 25.72 18.71 0
 19 -3 -2 12.32 18.91 0
 -19 3 2 16.25 19.58 0
 -19 -3 2 2.86 12.99 0
 19 -3 -2 16.25 18.92 0
 -19 3 2 10.34 18.76 0
 -17 3 2 7.43 26.42 0
 17 3 -2 19.89 18.77 0
 -17 -3 2 27.93 19.6 0
 17 3 -2 -0.74 18.62 0
 -17 3 2 3.68 19.5 0
 17 -3 -2 8.29 19.86 0
 17 -3 -2 -0.62 19.36 0
 -17 -3 2 10.39 19.37 0
 15 3 -2 161.93 15.73 0
 -15 -3 2 183.05 22.24 0
 15 3 -2 189.32 21.58 0
 15 -3 -2 191.08 27.54 0
 -15 -3 2 180.51 21.34 0
 -15 3 2 196.62 27.71 0
 15 -3 -2 164.41 22.77 0
 -15 3 2 217.72 28.48 0
 -13 -3 2 102.39 24.47 0
 -13 -3 2 93.97 24.18 0
 13 3 -2 93.19 23.62 0
 13 -3 -2 101.37 24.42 0
 13 -3 -2 86.16 29.39 0
 -13 3 2 90.77 24.21 0
 13 3 -2 81.4 17.27 0
 -13 3 2 99.52 25.46 0
 -11 -3 2 37.8 28.14 0
 -11 -3 2 30.26 27.25 0
 11 3 -2 20.73 26.53 0
 11 -3 -2 17.86 30.37 0
 -11 3 2 18.23 33.03 0
 11 -3 -2 12.05 30.76 0
 11 3 -2 12.79 19.67 0
 -11 3 2 12.64 31.8 0
 -9 3 2 276.83 34.98 0
 9 -3 -2 265.18 36.73 0
 -9 -3 2 319.56 21.36 0
 9 -3 -2 292.16 36.21 0
 -9 -3 2 314.57 27.85 0
 9 3 -2 329.1 27.51 0
 9 3 -2 264.27 20.74 0
 -9 3 2 345.73 39.72 0
 -7 -3 2 79.03 26.97 0
 7 3 -2 65.38 27.05 0
 7 -3 -2 74.83 41.41 0
 -7 -3 2 77.5 26.71 0
 -7 3 2 80.78 44.72 0
 -7 3 2 64.16 41.63 0
 7 3 -2 76.07 26.59 0
 7 -3 -2 63.7 41.52 0
 -5 -3 2 1210.5 34.78 0
 5 3 -2 1229.73 35.03 0
 5 3 -2 1164.96 35.14 0
 -5 -3 2 1186.04 34.23 0
 -3 -3 2 758 31.33 0
 3 3 -2 741.72 31.26 0
 3 3 -2 728.01 32.89 0
 -3 -3 2 777.11 32.74 0
 1 -3 -2 2010.58 61.78 0
 -1 -3 2 2105.16 46.18 0
 1 3 -2 1957.96 46.15 0
 -1 3 2 1821.21 56.65 0
 -1 3 2 1889.3 58.85 0
 -1 -3 2 1957.43 39.69 0
 1 3 -2 1906.53 39.49 0
 1 -3 -2 1834.12 58.37 0
 1 -3 2 239.89 26.81 0
 -1 3 -2 243.76 27.69 0
 -1 3 -2 230.21 26.43 0
 -1 -3 -2 215.64 35.33 0
 1 -3 2 240.01 27.29 0
 -1 -3 -2 249.5 36.74 0
 1 3 2 227.41 35.44 0
 1 3 2 233.77 35.63 0
 3 -3 2 187.97 25.74 0
 -3 3 -2 201.46 26.49 0
 3 3 2 196.88 28.56 0
 3 -3 2 215.24 31.93 0
 3 3 2 194.69 29.17 0
 -3 -3 -2 185.04 27.89 0
 -3 -3 -2 220.82 29.04 0
 -3 3 -2 204.98 30.93 0
 -5 -3 -2 534.21 31.14 0
 5 3 2 485.75 35.89 0
 -5 3 -2 590.61 33.39 0
 5 -3 2 565.16 32.96 0
 5 3 2 537.79 31.33 0
 -5 -3 -2 491.79 30.05 0
 -5 3 -2 514.76 27.35 0
 5 -3 2 524.2 32.53 0
 -7 -3 -2 656.29 30.27 0
 -7 -3 -2 585.77 29.71 0
 7 -3 2 609.24 30.18 0
 7 -3 2 656.19 30.8 0
 7 3 2 644.01 31.78 0
 -7 3 -2 653.92 34.32 0
 -7 3 -2 563.76 28.79 0
 7 3 2 584.46 29.54 0
 9 3 2 55.62 25.59 0
 9 3 2 71.59 26.63 0
 -9 -3 -2 60.14 27.02 0
 -9 3 -2 42.6 31.79 0
 -9 -3 -2 57.28 26.41 0
 9 -3 2 50.82 30.06 0
 -9 3 -2 51.96 24.44 0
 9 -3 2 52.77 26.39 0
 -11 3 -2 319.06 24.39 0
 11 -3 2 372.32 26.54 0
 -11 -3 -2 301.18 24.12 0
 11 -3 2 321.95 29.84 0
 -11 -3 -2 369.72 24.76 0
 11 3 2 303.32 25.14 0
 11 3 2 334.81 25.18 0
 -11 3 -2 350.16 25.2 0
 -13 -3 -2 13.95 21.16 0
 13 -3 2 8.72 21.27 0
 -13 3 -2 -0.87 26.58 0
 -13 3 -2 4.03 21.47 0
 13 3 2 6.79 21.3 0
 13 -3 2 14 22.34 0
 -13 -3 -2 -13.04 20.72 0
 13 3 2 -0.58 20.68 0
 15 3 2 334.05 21.78 0
 -15 3 -2 299.5 20.57 0
 15 -3 2 284.48 21.09 0
 -15 -3 -2 305.46 20.97 0
 15 3 2 275.35 21.3 0
 -15 3 -2 342.97 21.35 0
 -15 -3 -2 331.26 15.61 0
 15 -3 2 313.86 21.04 0
 17 -3 2 306.83 20.32 0
 17 -3 2 337.12 19.76 0
 -17 3 -2 354.84 21.33 0
 -17 3 -2 306.15 20.3 0
 17 3 2 311.94 20.25 0
 -17 -3 -2 328.17 19.81 0
 -17 -3 -2 380.29 20.55 0
 17 3 2 314.59 19.72 0
 19 -3 2 16.42 20.85 0
 19 3 2 13.8 13.12 0
 19 3 2 -8.96 18.83 0
 -19 3 -2 29.75 17.33 0
 19 -3 2 28.57 18.07 0
 -19 -3 -2 14.99 18.72 0
 -19 3 -2 9.66 18.2 0
 -19 -3 -2 2.19 18.24 0
 -21 3 -2 13.78 17.51 0
 -21 3 -2 18.22 18.66 0
 21 -3 2 17.57 17.32 0
 21 3 2 -2.79 13.82 0
 -21 -3 -2 -0.18 19.46 0
 -21 -3 -2 -21.15 17.69 0
 21 3 2 3.19 13.1 0
 21 -3 2 12.21 16.72 0
 -23 3 -2 77.22 17.86 0
 23 3 2 78.73 17.05 0
 -23 3 -2 104.13 18.68 0
 -23 -3 -2 84.55 12.68 0
 23 -3 2 65.31 18.12 0
 -23 -3 -2 91.77 17.21 0
 23 -3 2 84.14 18.33 0
 23 3 2 91.9 12.52 0
 25 3 2 147.71 18.41 0
 -25 3 -2 149.59 18.3 0
 25 -3 2 119.67 17.92 0
 -25 -3 -2 145.72 18.17 0
 -25 -3 -2 170.06 13.41 0
 -25 3 -2 133.09 17.2 0
 25 -3 2 131.82 17.67 0
 25 3 2 132.27 17.44 0
 -27 -3 -2 43.17 16.39 0
 27 -3 2 19.26 16.37 0
 -27 -3 -2 26.34 11.75 0
 -27 3 -2 38.37 17.03 0
 -27 3 -2 31.99 15.52 0
 27 3 2 26.44 15.51 0
 27 3 2 44.58 16.27 0
 27 -3 2 25.91 16.02 0
 -29 -3 -2 172.61 11.92 0
 29 -3 2 121.98 17.14 0
 -29 3 -2 166.57 16.15 0
 29 -3 2 141.7 16.18 0
 -29 -3 -2 164.38 16.03 0
 29 3 2 152.61 15.82 0
 -29 3 -2 173.48 17.3 0
 29 3 2 153.38 15.9 0
 -31 3 -2 2.8 14.81 0
 31 3 2 9.39 10.39 0
 -31 3 -2 14.2 15.83 0
 31 -3 2 0.11 15.68 0
 -31 -3 -2 -5.59 14.87 0
 -31 -3 -2 12.35 15.54 0
 31 3 2 3.93 15.18 0
 31 -3 2 9.25 15.08 0
 33 3 2 59.33 10.63 0
 33 -3 2 60.81 15.67 0
 -33 3 -2 55.14 15.17 0
 -33 3 -2 72.66 16.05 0
 33 3 2 59.26 14.78 0
 -33 -3 -2 49.56 10.72 0
 33 -3 2 58.19 15.78 0
 -33 -3 -2 72.31 15.55 0
 35 3 2 72.62 10.66 0
 -35 3 -2 63.08 15.82 0
 -35 3 -2 89.59 15.57 0
 35 -3 2 64.29 14.86 0
 35 -3 2 63.73 15.2 0
 -35 -3 -2 79.45 15.25 0
 -35 -3 -2 48.8 15.05 0
 35 3 2 56.28 14.76 0
 -36 -4 2 8.56 10.63 0
 36 -4 -2 -4.74 14.68 0
 36 4 -2 8.2 14.57 0
 -36 4 2 -15.48 19.18 0
 36 -4 -2 -7.68 14.76 0
 -36 -4 2 4.41 14.36 0
 36 4 -2 33.68 14.9 0
 -36 4 2 4.44 14.55 0
 -34 4 2 13.19 20.63 0
 34 -4 -2 -7.53 14.7 0
 34 4 -2 20.88 14.37 0
 34 4 -2 -17.51 14.81 0
 -34 4 2 -0.24 14.75 0
 -34 -4 2 14.39 14.68 0
 34 -4 -2 -8.31 15.05 0
 -34 -4 2 -5.19 10.58 0
 -32 -4 2 21.47 15.79 0
 -32 4 2 45.55 20.09 0
 32 -4 -2 38.11 15.77 0
 -32 4 2 49.94 18.61 0
 32 4 -2 48.65 15.6 0
 32 4 -2 36.18 15.17 0
 32 -4 -2 50.83 15.4 0
 -32 -4 2 62.99 15.56 0
 -30 4 2 9.02 18.3 0
 -30 -4 2 8.65 15.89 0
 30 -4 -2 -8.72 15.63 0
 -30 -4 2 12.27 15.41 0
 30 4 -2 11.02 10.01 0
 -30 4 2 1.68 16.53 0
 30 -4 -2 17.43 15.27 0
 30 4 -2 35.59 15.23 0
 -28 4 2 27.28 19.6 0
 28 4 -2 -7.1 10.97 0
 28 -4 -2 5.5 16.22 0
 28 -4 -2 12.9 16.25 0
 -28 -4 2 9.67 11.44 0
 -28 -4 2 5.53 16.23 0
 -28 4 2 9.43 17.04 0
 28 4 -2 2.58 16.57 0
 26 -4 -2 59.57 20.85 0
 -26 -4 2 75.86 17.59 0
 26 4 -2 40.94 17.47 0
 -26 4 2 74.69 17.75 0
 26 4 -2 69.3 16.75 0
 26 -4 -2 59.58 16.36 0
 -26 4 2 67.13 16.88 0
 -26 -4 2 74.5 12.24 0
 24 -4 -2 30.11 16.76 0
 -24 -4 2 26.87 16.4 0
 24 -4 -2 16.45 20.5 0
 24 4 -2 17.27 17.05 0
 -24 -4 2 17.22 17.17 0
 -24 4 2 26.31 17.11 0
 24 4 -2 32.15 17.08 0
 -24 4 2 22.26 21.36 0
 -22 -4 2 520.81 19.69 0
 22 -4 -2 404.33 24.9 0
 -22 4 2 556.57 26.05 0
 22 -4 -2 447.17 21.07 0
 -22 -4 2 495.71 19.87 0
 22 4 -2 444.89 19.13 0
 -22 4 2 474.38 24.33 0
 22 4 -2 481.1 20.62 0
 20 4 -2 447.15 20.34 0
 -20 -4 2 453.98 15.62 0
 20 -4 -2 382.74 21.28 0
 -20 -4 2 415.24 19.86 0
 20 -4 -2 431.01 24.66 0
 20 4 -2 416.7 19.95 0
 -20 4 2 402.73 24.87 0
 -20 4 2 470.71 22.93 0
 -18 4 2 197.19 25.69 0
 18 4 -2 174.52 19.3 0
 -18 4 2 165.29 24.36 0
 18 -4 -2 175.71 24.45 0
 18 4 -2 159.93 14.45 0
 18 -4 -2 158.62 24.16 0
 -18 -4 2 183.85 19.96 0
 -18 -4 2 172.1 19.51 0
 16 4 -2 475.48 21.15 0
 16 4 -2 522.42 16.27 0
 16 -4 -2 454.05 28.45 0
 -16 4 2 576.24 29.88 0
 -16 -4 2 564.4 21.04 0
 -16 4 2 501.77 24.59 0
 -16 -4 2 489.6 21.79 0
 16 -4 -2 530.96 28.07 0
 -14 -4 2 179.02 15.34 0
 14 4 -2 182.01 20.57 0
 -14 4 2 169.19 26.67 0
 -14 -4 2 151.82 15.22 0
 -14 4 2 191.83 28.65 0
 14 4 -2 176.28 19.9 0
 14 -4 -2 182.17 26.56 0
 14 -4 -2 156.33 27.01 0
 -12 -4 2 1402.17 27.76 0
 12 -4 -2 1216.58 42.58 0
 12 4 -2 1386.41 27.29 0
 12 4 -2 1161.5 21.88 0
 -12 4 2 1197.64 38.3 0
 12 -4 -2 1340.57 39.04 0
 -12 4 2 1469.4 44.17 0
 -12 -4 2 1317.67 27.71 0
 10 4 -2 503.85 24.08 0
 10 -4 -2 570.81 44.65 0
 -10 -4 2 574.61 25.29 0
 -10 -4 2 498.79 24.58 0
 -10 4 2 593.84 42.3 0
 -10 4 2 505.98 40.91 0
 10 4 -2 558.14 24.94 0
 10 -4 -2 485.71 40.5 0
 -8 -4 2 65.52 24.65 0
 8 -4 -2 73.82 61.27 0
 -8 -4 2 74.72 24.88 0
 -8 4 2 56.11 55.23 0
 -8 4 2 82.75 54.21 0
 8 4 -2 84.45 24.8 0
 8 4 -2 76.13 24.96 0
 6 4 -2 153.28 26.76 0
 -6 -4 2 141.13 26.91 0
 6 4 -2 151.38 26.81 0
 -6 -4 2 146.52 26.71 0
 4 4 -2 154.4 27.31 0
 4 4 -2 178.82 31.61 0
 -4 -4 2 179.71 26.83 0
 -2 4 2 86.86 41.31 0
 -2 -4 2 89.72 23.24 0
 2 4 -2 95.69 23.37 0
 -2 4 2 92.27 41.97 0
 2 -4 -2 97.77 43 0
 -2 -4 2 97.04 28.98 0
 2 4 -2 92.12 25.38 0
 2 -4 -2 97.03 41.55 0
 0 -4 2 54.48 23.08 0
 0 -4 2 65.21 27.55 0
 0 4 -2 57.85 21.51 0
 0 -4 -2 54.66 30.9 0
 0 4 2 66.38 33.89 0
 0 4 -2 60.7 28.78 0
 0 -4 -2 60.16 31.76 0
 0 4 2 56.75 31.07 0
 -2 4 -2 8.26 21.22 0
 -2 -4 -2 2.78 25.99 0
 2 4 2 8 30.94 0
 2 4 2 14.7 25.77 0
 2 -4 2 13.21 22.3 0
 -2 4 -2 4.26 27.83 0
 2 -4 2 9.69 22.34 0
 -2 -4 -2 9.85 30.17 0
 4 4 2 602.61 30.12 0
 4 -4 2 622.15 34.64 0
 -4 4 -2 601.44 32.74 0
 4 -4 2 582.65 32.29 0
 -4 -4 -2 609.1 36.14 0
 -4 -4 -2 543.11 28.64 0
 4 4 2 576.05 30.1 0
 -4 4 -2 577.55 32.2 0
 6 -4 2 64.17 30.01 0
 -6 4 -2 53.22 23.86 0
 -6 -4 -2 55.42 24.91 0
 -6 4 -2 66.31 30.03 0
 -6 -4 -2 52.95 26.32 0
 6 -4 2 58.14 28.19 0
 6 4 2 58.87 26.12 0
 6 4 2 57.99 25.42 0
 8 4 2 544.36 25.4 0
 8 -4 2 550.49 28.18 0
 -8 4 -2 589.61 32.33 0
 8 -4 2 498.1 30.72 0
 8 4 2 489.83 24.77 0
 -8 4 -2 506.04 31.11 0
 -8 -4 -2 496.18 24.73 0
 -8 -4 -2 553.89 25.43 0
 -10 4 -2 91.93 22.41 0
 10 -4 2 99.21 23.35 0
 -10 -4 -2 120.83 22.68 0
 10 4 2 104.91 22.3 0
 -10 4 -2 116.95 23.06 0
 -10 -4 -2 84 21.21 0
 10 4 2 89.35 21.59 0
 10 -4 2 91.76 22.17 0
 -12 -4 -2 658 23.11 0
 -12 4 -2 619.52 28.62 0
 12 4 2 628.22 23.08 0
 12 -4 2 619.22 25.13 0
 -12 4 -2 655.5 25.46 0
 -12 -4 -2 568.76 22.67 0
 12 -4 2 556.17 24.61 0
 12 4 2 578.64 22.54 0
 -14 4 -2 4.48 20.72 0
 -14 -4 -2 11.44 19.46 0
 14 4 2 19.01 19.09 0
 -14 -4 -2 4.66 13.48 0
 14 4 2 6.4 19.62 0
 14 -4 2 1.47 19.07 0
 14 -4 2 5.88 20.46 0
 -14 4 -2 16.04 23.58 0
 16 4 2 30.64 18.7 0
 -16 4 -2 42.49 19.57 0
 -16 -4 -2 14.88 19.32 0
 16 -4 2 33.7 18.88 0
 16 4 2 33.16 19.26 0
 16 -4 2 24.51 18.42 0
 -16 -4 -2 40.99 18.8 0
 -16 4 -2 31.79 18.7 0
 18 -4 2 7.26 17.93 0
 -18 4 -2 4.05 18.54 0
 -18 -4 -2 7.4 18.55 0
 -18 -4 -2 8.2 17.41 0
 18 4 2 8.74 18.41 0
 18 4 2 0.38 12.66 0
 -18 4 -2 2.56 18.26 0
 18 -4 2 4.07 17.46 0
 20 4 2 986.24 21.43 0
 -20 -4 -2 978.76 21.26 0
 -20 4 -2 985.69 22.63 0
 -20 -4 -2 1050.9 17.91 0
 20 -4 2 1013.63 22.98 0
 20 4 2 1057.17 21.86 0
 -20 4 -2 1123.97 24.05 0
 20 -4 2 936.25 22.66 0
 -22 -4 -2 519.86 15.19 0
 22 4 2 492.29 19.49 0
 -22 4 -2 482.26 19.99 0
 -22 -4 -2 478.98 18.84 0
 22 4 2 466.81 18.97 0
 22 -4 2 447.34 19.9 0
 -22 4 -2 562.7 20.44 0
 22 -4 2 489.25 20.09 0
 24 4 2 165.7 17.29 0
 -24 -4 -2 193.83 17.59 0
 -24 4 -2 193.17 18.29 0
 24 4 2 178.61 17.89 0
 24 -4 2 155.34 17.54 0
 -24 -4 -2 202.8 18.02 0
 24 -4 2 183.14 17.39 0
 -24 4 -2 178.35 17 0
 26 -4 2 9.13 15.69 0
 -26 4 -2 11.05 15.5 0
 26 4 2 2.72 16.24 0
 -26 -4 -2 8.73 12.2 0
 26 -4 2 19.51 16.02 0
 26 4 2 3.53 15.92 0
 -26 4 -2 3.46 16.4 0
 -26 -4 -2 11.55 15.44 0
 -28 4 -2 10.71 14.96 0
 28 -4 2 8.55 15.44 0
 -28 -4 -2 19.12 15.23 0
 28 4 2 -7.63 15.3 0
 -28 -4 -2 16.92 11.07 0
 28 4 2 31.7 14.83 0
 -28 4 -2 14.57 16.19 0
 28 -4 2 10.96 15.24 0
 -30 4 -2 75.17 17.07 0
 -30 -4 -2 84.28 15.34 0
 -30 -4 -2 75.74 11.32 0
 -30 4 -2 56.96 14.77 0
 30 -4 2 64.78 15.79 0
 30 4 2 75.91 15.7 0
 30 -4 2 41.79 15.42 0
 30 4 2 64.06 15.28 0
 -32 -4 -2 70.53 14.69 0
 32 4 2 60.84 14.49 0
 32 -4 2 42.13 15.49 0
 32 -4 2 50.45 15.25 0
 32 4 2 47.29 10.43 0
 -32 4 -2 67.99 15.84 0
 -32 4 -2 53.89 15.88 0
 -32 -4 -2 87.15 15.35 0
 34 -4 2 65.84 17.01 0
 -34 4 -2 58.24 15.6 0
 34 4 2 67.02 14.78 0
 -34 -4 -2 75.76 15.38 0
 34 -4 2 55.42 15.37 0
 -34 -4 -2 62.64 15.33 0
 34 4 2 53.54 15.07 0
 -34 4 -2 81.45 17.47 0
 35 5 -2 33.53 15.03 0
 35 -5 -2 12.12 15.46 0
 35 -5 -2 13.97 15.01 0
 -35 5 2 31.37 14.3 0
 -35 -5 2 29.53 14.98 0
 -35 5 2 3.09 16.01 0
 -35 -5 2 12.95 9.95 0
 35 5 -2 18.31 14.31 0
 33 -5 -2 108.31 16.13 0
 33 5 -2 121.22 11.33 0
 33 5 -2 153.91 15.15 0
 -33 -5 2 161.42 15.78 0
 33 -5 -2 136.23 16.1 0
 -33 -5 2 157.15 15.68 0
 -33 5 2 137.45 20.03 0
 -33 5 2 173.7 18.65 0
 31 -5 -2 133.1 15.17 0
 -31 -5 2 186.29 16.23 0
 -31 5 2 165.5 20.52 0
 -31 5 2 144.18 19.67 0
 -31 -5 2 144.89 15.91 0
 31 5 -2 129.35 15.55 0
 31 5 -2 144.85 15.84 0
 31 -5 -2 120.85 19.98 0
 -29 -5 2 -13.68 15.39 0
 29 5 -2 0.39 15.52 0
 -29 5 2 9.05 20.86 0
 29 -5 -2 4.48 15.6 0
 29 5 -2 26.76 15.23 0
 29 -5 -2 5.07 20.29 0
 -29 -5 2 8.64 15.18 0
 -29 5 2 7.77 19.62 0
 -27 -5 2 108.91 17.22 0
 27 5 -2 112.83 16.31 0
 27 5 -2 100.12 16.36 0
 27 -5 -2 85.98 20.89 0
 -27 5 2 90.72 17.23 0
 27 -5 -2 100.06 17.03 0
 -27 -5 2 107.26 16.18 0
 -27 5 2 106.45 18.01 0
 25 -5 -2 35.11 21.76 0
 -25 -5 2 35.48 16.91 0
 -25 -5 2 39.64 17.87 0
 -25 5 2 30.53 17.6 0
 -25 5 2 34.92 18.09 0
 25 5 -2 24.94 16.78 0
 25 -5 -2 31.38 17.36 0
 25 5 -2 39.47 17.04 0
 -23 5 2 48.12 22.75 0
 23 5 -2 39.89 17.06 0
 23 -5 -2 42.62 18.42 0
 -23 -5 2 36.76 16.54 0
 23 5 -2 28.06 11.62 0
 -23 5 2 34.63 22.16 0
 -23 -5 2 12.39 17.3 0
 23 -5 -2 31.65 22.52 0
 21 -5 -2 3.35 17.2 0
 -21 -5 2 9.51 17.26 0
 21 5 -2 17.49 17.48 0
 -21 5 2 3.24 21.77 0
 -21 -5 2 2.77 16.97 0
 -21 5 2 -1.5 23.25 0
 21 -5 -2 5.78 21.39 0
 21 5 -2 6.64 16.83 0
 -19 -5 2 126 18.5 0
 19 -5 -2 129.14 23.43 0
 -19 -5 2 146.51 18.72 0
 19 5 -2 152.3 18.38 0
 19 5 -2 139.46 13.22 0
 -19 5 2 120.87 19.23 0
 19 -5 -2 140.12 24 0
 -19 5 2 148.52 24.55 0
 -17 5 2 6.54 24.62 0
 -17 5 2 12.09 23.97 0
 17 5 -2 18.14 18.91 0
 17 -5 -2 8.22 22.93 0
 17 -5 -2 5.41 23.68 0
 -17 -5 2 13.31 18.43 0
 17 5 -2 21.66 19.25 0
 -17 -5 2 7.4 13.38 0
 15 -5 -2 21.71 27.61 0
 15 5 -2 12.9 12.24 0
 15 -5 -2 15.91 23.53 0
 -15 5 2 14.19 24.16 0
 -15 5 2 17.89 24.79 0
 15 5 -2 11.48 18.61 0
 -15 -5 2 22.13 19.12 0
 -15 -5 2 15.69 18.67 0
 -13 5 2 66.54 29.91 0
 -13 -5 2 74.53 18.1 0
 -13 5 2 58.66 27.73 0
 -13 -5 2 65.96 14.57 0
 13 -5 -2 62.82 29.01 0
 13 5 -2 71.44 19.19 0
 13 -5 -2 60.31 29.35 0
 13 5 -2 56.6 19.44 0
 11 5 -2 19.1 19.13 0
 11 5 -2 23.48 19.25 0
 11 -5 -2 28.82 34.19 0
 11 -5 -2 23.3 32.66 0
 -11 -5 2 23.72 18.62 0
 -11 5 2 20.71 33.9 0
 -11 -5 2 42.35 18.82 0
 -11 5 2 28.49 37.03 0
 9 5 -2 33.4 24.01 0
 9 5 -2 47.99 20.8 0
 -9 -5 2 23.84 19.85 0
 -9 -5 2 32.7 20.58 0
 7 5 -2 149.37 22.26 0
 -7 -5 2 153.57 22.23 0
 -7 -5 2 152.55 27.11 0
 7 5 -2 170.17 21.51 0
 5 5 -2 53.84 22.48 0
 5 5 -2 63.26 22.03 0
 -5 -5 2 47.57 27.71 0
 3 -5 -2 1.8 41.58 0
 -3 -5 2 6.68 28.29 0
 -3 5 2 5.44 39.85 0
 -3 -5 2 6.92 21.47 0
 3 -5 -2 2.83 46.54 0
 3 5 -2 6.13 27.91 0
 3 5 -2 1.42 26.61 0
 -3 5 2 1.9 42.96 0
 1 -5 -2 65.84 37.01 0
 -1 5 2 68.85 35.03 0
 1 5 -2 65.71 28.59 0
 1 -5 -2 69.46 35.35 0
 -1 -5 2 56.44 22.61 0
 -1 -5 2 74.32 29.09 0
 -1 5 2 69.64 33.9 0
 1 5 -2 60.37 21.96 0
 1 5 2 1514.96 40.9 0
 1 -5 2 1623.36 39.55 0
 -1 5 -2 1458.99 34.72 0
 1 -5 2 1535.09 33.41 0
 1 5 2 1551.73 39.44 0
 -1 -5 -2 1605.43 41.92 0
 -1 5 -2 1478.49 36.24 0
 -1 -5 -2 1483.11 40.27 0
 -3 5 -2 31.5 28.26 0
 3 -5 2 33.47 26.99 0
 -3 -5 -2 45.16 30.1 0
 -3 5 -2 28.08 25.43 0
 -3 -5 -2 28.7 28.19 0
 3 5 2 31.27 28.88 0
 3 5 2 39.15 28.74 0
 3 -5 2 33.24 27.06 0
 5 5 2 1741.94 32.97 0
 -5 5 -2 1770.46 39.02 0
 -5 -5 -2 1924.84 34.19 0
 -5 5 -2 1870.36 39.29 0
 5 5 2 1868.53 33.94 0
 5 -5 2 1981.66 40.69 0
 5 -5 2 1793.7 39.74 0
 -5 -5 -2 1753.6 36.78 0
 7 5 2 152.37 22.24 0
 -7 -5 -2 148.5 23.35 0
 7 -5 2 125.76 25.63 0
 7 -5 2 142.27 27.34 0
 -7 5 -2 137.76 25.84 0
 -7 -5 -2 145.32 26.54 0
 -7 5 -2 142.93 26.9 0
 7 5 2 156.32 21.8 0
 -9 5 -2 156.21 25.73 0
 9 5 2 141.69 21.55 0
 -9 5 -2 133.77 25.07 0
 -9 -5 -2 116.56 21.05 0
 9 -5 2 130.02 24.08 0
 9 5 2 152.48 19.97 0
 9 -5 2 152.96 25.98 0
 -9 -5 -2 159.15 20.41 0
 11 -5 2 212 22.41 0
 -11 -5 -2 203.74 19.17 0
 -11 -5 -2 223.3 19.96 0
 11 5 2 221.15 19.19 0
 11 -5 2 191.88 24.05 0
 -11 5 -2 237.84 26.59 0
 -11 5 -2 197.32 25.68 0
 11 5 2 202.73 19.11 0
 -13 5 -2 6.57 23.55 0
 13 -5 2 4.18 22.73 0
 -13 -5 -2 16.85 16.28 0
 13 5 2 8.49 18.29 0
 13 -5 2 8.2 23.13 0
 -13 5 -2 13.41 22.77 0
 -13 -5 -2 12.35 17.98 0
 13 5 2 11.78 19.23 0
 -15 5 -2 64.46 23.48 0
 15 -5 2 37.86 22.22 0
 15 -5 2 59.28 23.01 0
 -15 -5 -2 41.01 19.1 0
 15 5 2 56.17 18.71 0
 -15 -5 -2 49.36 18.26 0
 15 5 2 46.73 18.88 0
 -15 5 -2 54.62 19 0
 -17 5 -2 85.99 23.94 0
 -17 5 -2 79.59 23.38 0
 17 -5 2 87 23.44 0
 17 5 2 104.18 13.33 0
 17 5 2 87.21 18.07 0
 17 -5 2 80.92 23.06 0
 -17 -5 -2 105.03 13.11 0
 -17 -5 -2 92.83 18.56 0
 -19 -5 -2 249.3 19.18 0
 -19 5 -2 221.01 18.54 0
 -19 5 -2 236.37 19.34 0
 19 -5 2 236.86 18.76 0
 19 5 2 229.78 13.62 0
 19 -5 2 200.09 18.54 0
 19 5 2 211 17.25 0
 -19 -5 -2 208.98 18.67 0
 21 -5 2 -0.1 16.3 0
 21 -5 2 2.64 16.26 0
 -21 5 -2 3.15 21.12 0
 -21 -5 -2 -5.83 16.67 0
 21 5 2 4.11 12.52 0
 -21 -5 -2 12.36 17.36 0
 21 5 2 3.82 16.89 0
 -21 5 -2 12.54 16.83 0
 23 5 2 100.54 17.41 0
 23 -5 2 73.67 20.53 0
 23 5 2 78.74 17.78 0
 -23 5 -2 93.16 20.27 0
 23 -5 2 92.03 20.18 0
 -23 -5 -2 83.31 17.37 0
 -23 5 -2 89.35 17.73 0
 -23 -5 -2 90 17.09 0
 25 -5 2 64.91 20.67 0
 -25 5 -2 50.51 17.77 0
 -25 -5 -2 69.35 16.48 0
 -25 5 -2 57.84 16.21 0
 25 -5 2 67.62 20.45 0
 25 5 2 73.7 16.14 0
 25 5 2 55.4 16.27 0
 -25 -5 -2 54.5 12.06 0
 27 5 2 116.04 15.24 0
 -27 -5 -2 113.33 16.2 0
 27 -5 2 87.47 16.01 0
 27 -5 2 112.73 19.55 0
 -27 5 -2 108.3 15.98 0
 27 5 2 120.21 15.49 0
 -27 5 -2 116.6 16.86 0
 -27 -5 -2 117.55 16.58 0
 29 5 2 29.52 11.49 0
 -29 5 -2 42.82 16 0
 29 -5 2 40.08 15.75 0
 -29 -5 -2 68.36 15.98 0
 29 -5 2 39.32 16.1 0
 -29 5 -2 44.89 14.9 0
 -29 -5 -2 25.5 15.56 0
 29 5 2 26.42 15.02 0
 -31 -5 -2 37.93 10.85 0
 31 -5 2 39.92 15.57 0
 31 -5 2 44.51 15.75 0
 -31 -5 -2 56.24 15.31 0
 31 5 2 38.33 15 0
 31 5 2 44.11 14.92 0
 -31 5 -2 35.92 18.41 0
 -31 5 -2 49.17 15.82 0
 33 5 2 24.67 14.65 0
 -33 -5 -2 37.23 15.2 0
 -33 5 -2 35.61 15.14 0
 33 -5 2 29.19 15.31 0
 33 5 2 36.48 14.53 0
 -33 -5 -2 35.92 10.73 0
 33 -5 2 28.8 15.85 0
 -33 5 -2 52.77 16.36 0
 -34 6 2 11.93 20.26 0
 32 6 -2 16.45 15.37 0
 -32 6 2 7.04 15.47 0
 32 6 -2 13.3 14.68 0
 -32 -6 2 -17.55 14.77 0
 -32 6 2 15.09 19.79 0
 -32 -6 2 15.26 15.55 0
 32 -6 -2 3.93 19.33 0
 32 -6 -2 -5.18 16.36 0
 -30 -6 2 8.51 14.89 0
 30 6 -2 8.19 10.15 0
 -30 6 2 -1.82 16.41 0
 -30 6 2 2.1 16.82 0
 -30 -6 2 14.99 14.82 0
 30 -6 -2 -3.29 20.5 0
 30 6 -2 -6.55 15.21 0
 30 -6 -2 1.32 16.59 0
 28 6 -2 19.89 14.09 0
 -28 6 2 19.63 19.74 0
 -28 -6 2 21.59 15.06 0
 -28 -6 2 17.76 15.23 0
 28 -6 -2 16.55 19.13 0
 -28 6 2 11.06 16.98 0
 28 6 -2 32.82 14.88 0
 28 -6 -2 7.38 17.01 0
 -26 -6 2 268.72 16.58 0
 26 -6 -2 224.34 22.1 0
 26 6 -2 249.84 16.35 0
 26 -6 -2 262.37 21.6 0
 -26 6 2 246.66 18.04 0
 -26 -6 2 322.69 17.22 0
 26 6 -2 265.87 16.44 0
 -26 6 2 273.23 22.59 0
 -24 6 2 19.67 21.19 0
 24 -6 -2 17.82 20.05 0
 -24 -6 2 37.44 16.98 0
 24 6 -2 2.3 15.69 0
 24 -6 -2 17.93 17.21 0
 -24 6 2 15.25 22.73 0
 -24 -6 2 29.31 16.51 0
 24 6 -2 -2.36 15.42 0
 22 -6 -2 200.98 24.31 0
 -22 -6 2 218.4 12.97 0
 22 6 -2 235.94 16.58 0
 22 6 -2 219.83 16.94 0
 22 -6 -2 231.41 23.32 0
 -22 6 2 258.56 24.72 0
 -22 6 2 221.73 24.29 0
 -22 -6 2 264.27 16.92 0
 20 -6 -2 40.26 24.34 0
 20 6 -2 34.76 16.74 0
 -20 -6 2 39.32 16.41 0
 20 -6 -2 45.53 23.57 0
 -20 -6 2 43.04 17.04 0
 20 6 -2 46.91 16.95 0
 -20 6 2 42.14 24.24 0
 -20 6 2 38.6 24.49 0
 -18 6 2 49.52 23.26 0
 18 -6 -2 38.88 23.3 0
 18 6 -2 46.84 17.9 0
 18 6 -2 51.73 12.85 0
 -18 6 2 46.14 27.55 0
 18 -6 -2 45.64 26.78 0
 -18 -6 2 43.12 18.88 0
 -18 -6 2 46.6 17.64 0
 16 -6 -2 297.88 31.37 0
 16 6 -2 327.4 19.37 0
 -16 6 2 322.88 29.04 0
 -16 -6 2 325.1 19.52 0
 16 6 -2 328.58 19.34 0
 -16 6 2 387.14 30.16 0
 16 -6 -2 341.62 31.87 0
 -16 -6 2 362.99 19.81 0
 -14 -6 2 71.82 17.8 0
 -14 6 2 70.36 32.1 0
 14 6 -2 104.28 17.08 0
 14 -6 -2 66 32.8 0
 -14 6 2 92.46 31.48 0
 14 6 -2 88.12 17.25 0
 -14 -6 2 86.24 17.86 0
 14 -6 -2 81.95 34.2 0
 -12 -6 2 12.3 16.89 0
 12 6 -2 20.2 16.86 0
 12 6 -2 10.38 17.17 0
 -12 -6 2 22.16 20.91 0
 -10 -6 2 63.82 17.26 0
 10 6 -2 64.12 18.03 0
 -10 -6 2 58.36 17.96 0
 10 6 -2 51.11 17.29 0
 -8 -6 2 58.18 18.57 0
 8 6 -2 81.35 23.16 0
 -8 -6 2 67.08 19.34 0
 8 6 -2 76.85 18.27 0
 6 6 -2 157.03 20.67 0
 6 6 -2 145.43 20.87 0
 -6 -6 2 159.81 21.03 0
 -4 -6 2 1305.18 29.44 0
 4 6 -2 1347.41 32.98 0
 -4 -6 2 1353.79 30.63 0
 4 6 -2 1360.22 31.22 0
 -2 -6 2 331.28 22.72 0
 -2 6 2 293.91 30.49 0
 2 6 -2 320.19 24.92 0
 -2 6 2 329.09 32.53 0
 -2 -6 2 322.13 25.18 0
 2 -6 -2 323.1 33.6 0
 2 -6 -2 325.34 37.07 0
 2 6 -2 292.46 22.54 0
 0 -6 -2 3.78 24.48 0
 0 -6 -2 -8.6 30.57 0
 0 -6 2 -0.78 22.96 0
 0 -6 2 1.08 24.33 0
 0 6 2 2.32 24.69 0
 0 6 2 -0.86 25.63 0
 0 6 -2 -1.75 22.35 0
 0 6 -2 5.65 24.87 0
 -2 -6 -2 197.82 26.11 0
 -2 -6 -2 202.54 22.64 0
 -2 6 -2 185.24 26.55 0
 2 -6 2 196.64 24.46 0
 2 6 2 191.84 21.61 0
 2 6 2 205.04 26.79 0
 -2 6 -2 195.77 24 0
 2 -6 2 209.19 26.34 0
 -4 6 -2 161.25 23.99 0
 -4 -6 -2 185.89 26.73 0
 4 -6 2 177.96 25.07 0
 -4 -6 -2 162.11 25.43 0
 -4 6 -2 161.78 26.44 0
 4 6 2 165.28 21.31 0
 4 -6 2 166.46 25.88 0
 4 6 2 165.42 26.03 0
 -6 6 -2 212.75 29.72 0
 -6 -6 -2 197.43 21.16 0
 -6 -6 -2 209.16 21.47 0
 -6 6 -2 204.46 29.02 0
 6 6 2 213.73 21.3 0
 6 -6 2 222.88 26.08 0
 6 6 2 210.53 21.34 0
 6 -6 2 200.48 28.13 0
 8 -6 2 145.12 27.26 0
 -8 -6 -2 150.9 19.8 0
 -8 6 -2 160.54 27.15 0
 8 6 2 155.85 19.61 0
 8 6 2 166.45 19.44 0
 8 -6 2 163.01 24.74 0
 -8 6 -2 148.07 25.1 0
 -8 -6 -2 150.51 20.35 0
 -10 6 -2 34.16 22.72 0
 10 6 2 34.34 18.75 0
 -10 -6 -2 24.63 16.82 0
 10 -6 2 34.29 22.57 0
 10 -6 2 32.62 24.05 0
 10 6 2 31.78 18.57 0
 -10 -6 -2 34.58 17.54 0
 -10 6 -2 42.34 23.73 0
 12 -6 2 38.98 21.47 0
 -12 6 -2 39.86 23.09 0
 -12 -6 -2 38.99 16.66 0
 -12 -6 -2 52.21 18.51 0
 -12 6 -2 43.95 24.17 0
 12 -6 2 46.06 23.49 0
 12 6 2 38.81 17.09 0
 12 6 2 47.17 17.48 0
 14 -6 2 44.29 22.73 0
 -14 -6 -2 33.03 17.61 0
 -14 6 -2 27.26 17.33 0
 -14 6 -2 34.73 23.13 0
 14 6 2 31.53 18.64 0
 14 6 2 15.29 18.18 0
 -14 -6 -2 34 18.59 0
 14 -6 2 42.58 21.56 0
 -16 -6 -2 561.29 21 0
 16 -6 2 625.12 27.66 0
 -16 -6 -2 681.91 22.88 0
 -16 6 -2 669.77 27.8 0
 -16 6 -2 593.38 27.63 0
 16 6 2 594.44 21.12 0
 16 6 2 626.69 21.34 0
 16 -6 2 552.69 26.45 0
 18 6 2 112.6 17.51 0
 -18 -6 -2 126.09 17.91 0
 18 -6 2 99.23 22.24 0
 18 6 2 89.89 17.88 0
 -18 -6 -2 105.41 17.19 0
 -18 6 -2 112.76 24.02 0
 18 -6 2 97.87 24.2 0
 -18 6 -2 115.03 22.07 0
 -20 6 -2 8.7 18.51 0
 20 -6 2 19.56 17.78 0
 -20 -6 -2 10.2 10.91 0
 20 6 2 23.83 16.17 0
 -20 -6 -2 35.22 16.56 0
 20 -6 2 10 18.5 0
 20 6 2 20.96 16.08 0
 -20 6 -2 23.95 18.59 0
 -22 6 -2 13.94 20.56 0
 -22 6 -2 10.05 17.29 0
 -22 -6 -2 23.97 16.14 0
 -22 -6 -2 6.61 15.82 0
 22 6 2 9.15 15.6 0
 22 6 2 -6.66 15.65 0
 22 -6 2 14.34 16.16 0
 22 -6 2 14.34 21.68 0
 24 6 2 116.27 16.11 0
 24 -6 2 103.57 16.79 0
 -24 -6 -2 154.86 16.48 0
 -24 -6 -2 119.46 16.01 0
 24 6 2 107.02 16.07 0
 -24 6 -2 103.85 16.37 0
 -24 6 -2 122.35 21.98 0
 24 -6 2 97.23 20.3 0
 -26 -6 -2 22.23 15.94 0
 26 6 2 0.66 15.22 0
 26 -6 2 12.34 16.09 0
 26 6 2 -15.37 14.97 0
 -26 6 -2 12.37 15.5 0
 26 -6 2 5.15 16.29 0
 -26 6 -2 -2.51 17.19 0
 -26 -6 -2 -2.51 15.39 0
 -28 -6 -2 266.15 16.7 0
 28 6 2 200.6 16 0
 28 -6 2 156.12 17.07 0
 -28 6 -2 202.29 17.05 0
 28 -6 2 198.61 17.19 0
 -28 6 -2 228.08 18.68 0
 28 6 2 183.51 11.93 0
 -28 -6 -2 217.55 15.86 0
 -30 -6 -2 42.78 10.44 0
 -30 6 -2 48.29 16.29 0
 30 6 2 39.28 15.23 0
 30 6 2 35.55 14.66 0
 30 -6 2 42.53 15.98 0
 30 -6 2 34.37 19.7 0
 -30 6 -2 45.09 15.45 0
 -30 -6 -2 47.4 15.02 0
 31 -7 -2 25.14 19.85 0
 31 -7 -2 24.7 20.06 0
 31 7 -2 19.22 14.85 0
 -31 -7 2 34.37 14.64 0
 -31 -7 2 35.79 15.68 0
 31 7 -2 14.05 15.06 0
 -31 7 2 26.44 18.57 0
 -31 7 2 32.08 20.4 0
 -29 7 2 19.35 20.63 0
 29 -7 -2 20.28 19.34 0
 29 7 -2 22.77 14.85 0
 -29 -7 2 12.51 14.99 0
 29 -7 -2 22.57 20.41 0
 29 7 -2 7.84 14.2 0
 -29 7 2 25.88 17.69 0
 -29 -7 2 14.62 14.1 0
 27 -7 -2 44.75 21.24 0
 27 -7 -2 47.99 20.37 0
 27 7 -2 62.02 15.41 0
 -27 7 2 40.79 19.76 0
 -27 -7 2 40.65 10.96 0
 -27 -7 2 69.66 15.56 0
 27 7 -2 40.14 15.52 0
 -27 7 2 56.86 21.1 0
 25 7 -2 45.75 15.18 0
 -25 7 2 34.56 19.85 0
 25 -7 -2 25.13 21.11 0
 -25 -7 2 34.91 10.43 0
 -25 7 2 45.72 25.64 0
 25 -7 -2 31.55 21.04 0
 25 7 -2 24.28 15 0
 -25 -7 2 43.11 15.18 0
 23 -7 -2 3.11 20.88 0
 23 7 -2 8.71 11.68 0
 -23 7 2 7.72 22.64 0
 -23 -7 2 -2.62 16.76 0
 -23 7 2 2.66 21.3 0
 23 7 -2 3.52 16.37 0
 23 -7 -2 12.09 23.61 0
 -23 -7 2 23.74 16.63 0
 -21 -7 2 152.74 12.05 0
 -21 7 2 134.95 24.09 0
 21 7 -2 144.74 16.2 0
 21 -7 -2 166 25.26 0
 21 7 -2 148.89 17.13 0
 21 -7 -2 137.65 24.66 0
 -21 -7 2 204.61 18.25 0
 -21 7 2 176.38 26.05 0
 -19 -7 2 36.7 16.59 0
 -19 7 2 17.5 27.06 0
 19 -7 -2 19.32 27.51 0
 -19 7 2 25.16 27.78 0
 19 7 -2 21.23 17.07 0
 19 -7 -2 20.92 23.79 0
 19 7 -2 18.49 15.56 0
 -19 -7 2 27.69 16.14 0
 17 -7 -2 686.05 48.35 0
 17 7 -2 628.58 20.33 0
 -17 7 2 565.61 44.68 0
 -17 -7 2 674.02 21.21 0
 -17 7 2 705.44 43.16 0
 -17 -7 2 612.95 20.51 0
 17 7 -2 657.49 20.73 0
 17 -7 -2 537.17 44.57 0
 -15 -7 2 7.36 17.62 0
 15 7 -2 5.16 18.13 0
 15 7 -2 0.89 18.19 0
 -15 -7 2 21.26 17.82 0
 -13 -7 2 37.12 17.74 0
 13 7 -2 43.92 17.92 0
 -13 -7 2 37.91 18.36 0
 13 7 -2 49.98 18.56 0
 -11 -7 2 145.41 18.47 0
 11 7 -2 126.24 18.86 0
 -11 -7 2 150.68 19.27 0
 11 7 -2 141.55 18.93 0
 -9 -7 2 261.2 18.73 0
 9 7 -2 282.46 18.76 0
 9 7 -2 275.82 18.84 0
 -9 -7 2 309.24 20.09 0
 7 7 -2 114.35 17.84 0
 -7 -7 2 117.35 19.03 0
 7 7 -2 102.07 18.83 0
 -7 -7 2 105.66 18.27 0
 5 7 -2 106.91 18.71 0
 -5 -7 2 102.25 22.61 0
 5 7 -2 105.67 19.14 0
 -5 -7 2 99.37 20.2 0
 3 -7 -2 11.54 33.55 0
 3 7 -2 13.22 17.72 0
 -3 7 2 11.06 35.01 0
 -3 -7 2 26.54 21.53 0
 3 7 -2 19.69 24.47 0
 3 -7 -2 6.65 37.85 0
 -3 -7 2 11.53 23.07 0
 -3 7 2 10.14 31.69 0
 -1 -7 2 1.1 22.9 0
 1 7 -2 6.16 17.31 0
 1 -7 -2 3.68 25.75 0
 1 7 -2 6.44 19.48 0
 -1 7 2 -0.4 28.01 0
 1 -7 -2 5.46 29.09 0
 -1 7 2 -1.96 26.46 0
 -1 -7 2 10.46 21.52 0
 -1 7 -2 83 22.14 0
 1 7 2 92.51 23.91 0
 1 -7 2 91.87 24.04 0
 1 7 2 93.19 24.91 0
 1 -7 2 84.06 22.35 0
 -1 -7 -2 88.75 25.65 0
 -1 7 -2 98.01 24.36 0
 -1 -7 -2 85.26 27.21 0
 3 7 2 7.89 18.75 0
 -3 7 -2 6.4 22.04 0
 -3 7 -2 6.4 24.1 0
 3 -7 2 6.44 26.22 0
 -3 -7 -2 -1.23 22.59 0
 3 -7 2 4.93 23.85 0
 3 7 2 5.22 23.17 0
 -3 -7 -2 5.57 23.97 0
 -5 -7 -2 31.57 22.63 0
 5 7 2 31.86 18.96 0
 -5 -7 -2 43.24 24.08 0
 5 7 2 28.21 23.5 0
 5 -7 2 39.77 23.97 0
 -5 7 -2 37.62 27.21 0
 -5 7 -2 43.01 21.87 0
 5 -7 2 38.78 25.77 0
 -7 7 -2 117.98 26.96 0
 -7 -7 -2 120.28 18.91 0
 7 7 2 130.66 19.29 0
 7 7 2 125.41 19.32 0
 7 -7 2 114.34 26.86 0
 7 -7 2 138.2 26.22 0
 -7 -7 -2 122.83 23.21 0
 -9 -7 -2 31.8 18.44 0
 9 7 2 37.52 17.09 0
 -9 7 -2 31.87 24.81 0
 9 7 2 24 23.79 0
 -9 -7 -2 31.75 23.04 0
 -9 7 -2 30.29 21.98 0
 9 -7 2 25.79 24.94 0
 9 -7 2 35.71 26.29 0
 -11 -7 -2 275.47 23.49 0
 -11 7 -2 265.41 27.68 0
 11 -7 2 257.73 27.53 0
 11 7 2 256.85 22.85 0
 11 7 2 262.77 20.01 0
 -11 -7 -2 246.57 19.31 0
 11 -7 2 277.68 28.82 0
 -11 7 -2 253.73 24.99 0
 -13 7 -2 199.79 24.81 0
 -13 7 -2 229.27 27.35 0
 13 -7 2 209.69 24.78 0
 13 7 2 212.66 18.92 0
 13 7 2 201.04 19.4 0
 -13 -7 -2 204.87 19.3 0
 -13 -7 -2 227.8 19.8 0
 13 -7 2 193.51 26.92 0
 -15 7 -2 273.55 25.74 0
 15 7 2 258.82 19.46 0
 -15 7 -2 251.56 25.69 0
 15 -7 2 255.81 26.1 0
 -15 -7 -2 285.88 20.51 0
 15 -7 2 238.92 24.99 0
 15 7 2 262.77 19.02 0
 -15 -7 -2 237.58 13.68 0
 17 7 2 52.82 17.89 0
 17 -7 2 45.05 21.4 0
 17 -7 2 66.67 26.21 0
 -17 7 -2 48.28 21.9 0
 -17 -7 -2 59.58 17.74 0
 17 7 2 63.09 17.39 0
 -17 -7 -2 44.7 16.99 0
 -17 7 -2 53.8 22.55 0
 19 7 2 112.1 16.19 0
 -19 -7 -2 101.42 17.18 0
 -19 7 -2 119.97 21.66 0
 -19 7 -2 119.14 20.86 0
 19 7 2 106.56 15.57 0
 19 -7 2 114.17 22.94 0
 19 -7 2 101.11 21.92 0
 -19 -7 -2 119.57 17.09 0
 -21 7 -2 127.33 19.98 0
 -21 -7 -2 133.07 17.55 0
 21 7 2 128.1 17.94 0
 21 7 2 127.64 18.05 0
 -21 7 -2 142.66 21.41 0
 21 -7 2 116.43 21.3 0
 21 -7 2 106.08 21.34 0
 -21 -7 -2 168.96 17.44 0
 -23 -7 -2 316.94 17.52 0
 23 -7 2 256.61 18.86 0
 23 7 2 266.14 13.16 0
 -23 -7 -2 289.68 15.71 0
 -23 7 -2 295.16 22.41 0
 23 -7 2 222.92 21.96 0
 -23 7 -2 262.39 21.03 0
 23 7 2 245.2 16.35 0
 25 -7 2 41.13 21.08 0
 25 7 2 34.05 10.78 0
 25 7 2 58.87 15.37 0
 -25 -7 -2 51.53 15.28 0
 -25 7 -2 39.37 16.55 0
 25 -7 2 45.69 21.54 0
 -25 7 -2 55.68 21.9 0
 -25 -7 -2 61.43 16.21 0
 27 7 2 21.63 14.9 0
 -27 7 -2 12.2 18.55 0
 -27 -7 -2 22.56 15.15 0
 -27 7 -2 -0.37 20.23 0
 -27 -7 -2 12.32 15.07 0
 27 7 2 6.93 14.88 0
 27 -7 2 9.77 16.41 0
 27 -7 2 7.19 15.02 0
 -29 7 -2 2.73 20.01 0
 29 -7 2 14.22 14.66 0
 29 -7 2 -20.04 19.65 0
 -29 7 -2 -8.59 18.86 0
 -29 -7 -2 12.6 15.15 0
 29 7 2 -9.62 14.51 0
 29 7 2 13.72 10.33 0
 -29 -7 -2 -1.04 15.2 0
 -30 -8 2 95.41 15.4 0
 30 -8 -2 53.05 23.49 0
 30 -8 -2 73.15 22.84 0
 -30 -8 2 48.58 15.01 0
 30 8 -2 81.38 15.37 0
 -30 8 2 61.34 21.93 0
 -30 8 2 67.31 20.85 0
 30 8 -2 91.42 15.3 0
 -28 -8 2 73.68 15.23 0
 -28 -8 2 79.05 14.79 0
 -28 8 2 60.64 22.2 0
 -28 8 2 82.09 24.49 0
 28 -8 -2 62.93 20.76 0
 28 8 -2 82.48 15.25 0
 28 -8 -2 71.55 23.54 0
 28 8 -2 70.58 10.42 0
 -26 -8 2 15.13 15.92 0
 -26 -8 2 -6.81 15.08 0
 -26 8 2 8.81 23.96 0
 26 8 -2 26.24 14.98 0
 -26 8 2 1.32 21.6 0
 26 8 -2 -3.06 10.76 0
 26 -8 -2 8.46 22.92 0
 26 -8 -2 -0.22 25.6 0
 -24 -8 2 243.89 17.58 0
 24 -8 -2 209.81 28.35 0
 24 8 -2 204.18 16.57 0
 24 8 -2 204.33 15.58 0
 -24 8 2 225.39 28.69 0
 -24 -8 2 183.78 16.45 0
 -24 8 2 170.13 26.58 0
 24 -8 -2 169.07 27.62 0
 22 8 -2 174.45 16.21 0
 22 -8 -2 186.91 34.08 0
 -22 -8 2 193.33 17.06 0
 22 8 -2 191.16 16.55 0
 -22 8 2 201.73 33.88 0
 22 -8 -2 161.46 35.9 0
 -22 -8 2 177.82 17.05 0
 -20 -8 2 167.48 17.19 0
 -20 -8 2 166.45 16.85 0
 20 8 -2 160.25 16.87 0
 20 8 -2 152.07 17.46 0
 18 8 -2 535.59 19.28 0
 -18 -8 2 551.07 19.45 0
 18 8 -2 566.78 19.24 0
 -18 -8 2 609.11 19.47 0
 16 8 -2 133.89 18.21 0
 -16 -8 2 103.12 17.74 0
 -16 -8 2 145.37 18.59 0
 16 8 -2 111.79 18.03 0
 -14 -8 2 27.02 17.4 0
 14 8 -2 16.33 17.2 0
 14 8 -2 22.1 16.84 0
 -14 -8 2 44.85 17.65 0
 12 8 -2 1375.03 26.85 0
 -12 -8 2 1344.45 24.45 0
 -12 -8 2 1285.76 23.5 0
 12 8 -2 1287.14 24.19 0
 -10 -8 2 101.79 21.97 0
 10 8 -2 116.48 21.09 0
 10 8 -2 107.04 17.91 0
 -8 -8 2 95.87 17.86 0
 8 8 -2 93.76 18.74 0
 8 8 -2 112.28 17.85 0
 -8 -8 2 120.61 18.64 0
 -6 -8 2 186.68 23.79 0
 6 8 -2 172.22 23.13 0
 6 8 -2 180.73 18.67 0
 -6 -8 2 175.86 22.26 0
 4 8 -2 10.7 22.58 0
 -4 -8 2 10.78 18.93 0
 -4 -8 2 1.21 20.47 0
 4 8 -2 8.62 21.07 0
 2 8 -2 518.83 24.2 0
 2 8 -2 495.63 25.94 0
 2 -8 -2 533.37 39.1 0
 -2 -8 2 519.77 24.6 0
 2 -8 -2 534.62 33.9 0
 -2 -8 2 522.09 27.04 0
 -2 8 2 538.5 37.59 0
 -2 8 2 476.94 32.81 0
 0 -8 -2 1480.69 39.46 0
 0 8 -2 1397.83 30.56 0
 0 -8 -2 1368.19 35.77 0
 0 -8 2 1416.65 30.55 0
 0 8 -2 1413.83 33.03 0
 0 8 2 1330.53 33.35 0
 0 8 2 1443.88 38.19 0
 0 -8 2 1395.19 33.82 0
 -2 8 -2 367.91 29.08 0
 -2 8 -2 345.59 23.74 0
 2 8 2 373.39 24.68 0
 -2 -8 -2 383.56 26.26 0
 2 -8 2 373.97 26.44 0
 2 8 2 373.92 25.19 0
 2 -8 2 394.99 28.36 0
 -4 -8 -2 75.68 22.53 0
 4 8 2 71.58 20.16 0
 4 8 2 72.98 23.29 0
 -4 8 -2 72.06 25.32 0
 4 -8 2 88.97 26.59 0
 -4 -8 -2 82.04 24.33 0
 -4 8 -2 76.38 27.48 0
 4 -8 2 74.66 27.51 0
 -6 -8 -2 392.07 23.8 0
 -6 8 -2 409.37 30 0
 6 8 2 357.63 20.79 0
 -6 -8 -2 422.54 21.67 0
 6 -8 2 438.87 32.67 0
 6 -8 2 393.8 30.96 0
 6 8 2 403.97 20.39 0
 -6 8 -2 388.51 29.46 0
 8 -8 2 329.47 29.84 0
 -8 -8 -2 285.55 18.65 0
 8 8 2 305.37 19.2 0
 -8 -8 -2 358.86 23.5 0
 8 8 2 304.06 19.29 0
 -8 8 -2 298.08 32.41 0
 8 -8 2 288.2 30.23 0
 -8 8 -2 274.06 31.37 0
 -10 8 -2 818.65 37.51 0
 -10 -8 -2 901.41 22.55 0
 -10 -8 -2 799.72 21.91 0
 10 -8 2 826.57 38.99 0
 10 8 2 845.36 25.55 0
 -10 8 -2 843.83 34.33 0
 10 8 2 895 22.71 0
 10 -8 2 901 37.33 0
 12 -8 2 9.08 25.4 0
 -12 8 -2 -0.31 28.7 0
 12 -8 2 8.99 25.28 0
 -12 8 -2 4.37 25.38 0
 -12 -8 -2 9.59 16.76 0
 12 8 2 10.08 17.3 0
 -12 -8 -2 -0.04 17.61 0
 12 8 2 -10.81 20.44 0
 14 -8 2 51.13 28.62 0
 -14 8 -2 52.03 24.8 0
 -14 8 -2 49.05 24.91 0
 -14 -8 -2 56.02 17.73 0
 14 8 2 50.98 18.18 0
 -14 -8 -2 46.42 17.19 0
 14 -8 2 47.16 24.68 0
 14 8 2 58.93 17.15 0
 -16 -8 -2 350.5 18.23 0
 -16 8 -2 382.64 27.23 0
 -16 -8 -2 397.51 18.86 0
 16 -8 2 374.13 27.42 0
 -16 8 -2 320.94 23.51 0
 16 -8 2 334.38 23.75 0
 16 8 2 362.47 18.53 0
 16 8 2 363.99 18.17 0
 18 -8 2 12.66 22.83 0
 18 8 2 15.8 15.75 0
 18 8 2 33.43 15.84 0
 18 -8 2 19.06 23.49 0
 -18 -8 -2 19.87 17.32 0
 -18 -8 -2 18.6 16.92 0
 -18 8 -2 15.01 19.57 0
 -18 8 -2 10.94 21 0
 20 8 2 36.27 16.47 0
 20 8 2 42.64 16.32 0
 20 -8 2 31.2 24.31 0
 20 -8 2 28.71 20.65 0
 -20 -8 -2 16.32 16.79 0
 -20 8 -2 50.37 24.54 0
 -20 8 -2 36.42 20.16 0
 -20 -8 -2 64.18 16.87 0
 22 8 2 17.98 15.3 0
 -22 8 -2 21.42 20.67 0
 -22 -8 -2 14.82 15.65 0
 -22 -8 -2 17.65 16.51 0
 22 8 2 -0.83 15.69 0
 22 -8 2 17.69 20.01 0
 -22 8 -2 13.53 19.2 0
 22 -8 2 16.58 19.66 0
 -24 8 -2 13.18 18.65 0
 -24 -8 -2 26.25 16.03 0
 24 8 2 36.57 15.99 0
 -24 -8 -2 27.69 16.14 0
 24 8 2 38.62 15.91 0
 24 -8 2 28.89 19.52 0
 24 -8 2 23.91 19.39 0
 -24 8 -2 22.76 19.95 0
 -26 8 -2 -9.7 19.43 0
 26 -8 2 -9.02 19.22 0
 26 8 2 4.14 14.62 0
 26 8 2 -1.44 14.74 0
 -26 -8 -2 13.75 14.58 0
 26 -8 2 1.64 18.53 0
 -26 8 -2 3.62 18.73 0
 -26 -8 -2 16.31 15.17 0
 28 8 2 8.49 10.31 0
 28 -8 2 -3.77 20.01 0
 -28 8 -2 11.63 19.14 0
 -28 8 -2 13.11 20.59 0
 28 8 2 4.61 10.65 0
 -27 -9 2 67.99 15.1 0
 -27 -9 2 70.98 14.97 0
 27 9 -2 61.82 14.59 0
 27 9 -2 60.51 15.33 0
 -25 -9 2 0.31 15.86 0
 25 9 -2 2.64 15.38 0
 25 9 -2 12.5 15.39 0
 -25 -9 2 -10.29 15.03 0
 -23 -9 2 45.22 15.82 0
 23 9 -2 27.12 16.07 0
 -23 -9 2 34.63 15.76 0
 23 9 -2 31.14 15.47 0
 21 9 -2 176.52 16.92 0
 -21 -9 2 165.29 16.56 0
 -21 -9 2 189.39 17.53 0
 21 9 -2 164.66 17.21 0
 -19 -9 2 25.25 16.62 0
 19 9 -2 18.5 16.22 0
 19 9 -2 11.19 16.76 0
 -19 -9 2 10.12 15.15 0
 -17 -9 2 388.16 18.8 0
 -17 -9 2 363.98 17.21 0
 17 9 -2 346.86 17.4 0
 17 9 -2 362.62 18.48 0
 -15 -9 2 75.66 16.79 0
 -15 -9 2 80.75 16.41 0
 15 9 -2 75.62 15.85 0
 15 9 -2 90.29 16.83 0
 -13 -9 2 22.41 16.92 0
 13 9 -2 19.29 15.77 0
 13 9 -2 13.19 16.89 0
 11 9 -2 82.65 20.01 0
 -11 -9 2 80.34 17.79 0
 11 9 -2 81.28 21.4 0
 -11 -9 2 75.11 16.2 0
 -9 -9 2 351.56 18.13 0
 9 9 -2 343.58 19.75 0
 9 9 -2 330.44 21.64 0
 -9 -9 2 357.87 19.38 0
 7 9 -2 205.34 23.95 0
 -7 -9 2 188.22 17.93 0
 -7 -9 2 207.68 22.08 0
 7 9 -2 195.69 18.39 0
 5 9 -2 35.14 23.02 0
 -5 -9 2 31.24 20.93 0
 5 9 -2 38.87 18.1 0
 -5 -9 2 33.72 19.08 0
 -3 -9 2 22.1 20.87 0
 3 9 -2 14.08 20.46 0
 3 9 -2 13.78 23.4 0
 -3 -9 2 15.34 19.93 0
 1 -9 -2 17.57 29.12 0
 -1 9 2 6.85 25.18 0
 -1 -9 2 3.25 23.87 0
 -1 9 2 13.45 28.17 0
 -1 -9 2 12.14 20.89 0
 1 -9 -2 13.6 26.4 0
 1 9 -2 12.37 20.97 0
 1 9 -2 8.71 22.9 0
 -1 -9 -2 83.46 24.42 0
 -1 -9 -2 85.83 24.46 0
 1 9 2 95.57 26.46 0
 1 9 2 93.41 25.04 0
 -1 9 -2 88.09 24.81 0
 1 -9 2 84.98 27.93 0
 1 -9 2 102.23 25.28 0
 -1 9 -2 77.81 23.73 0
 3 9 2 -6.61 22.97 0
 -3 9 -2 4.54 19.82 0
 -3 -9 -2 -0.69 21.52 0
 3 -9 2 2.97 26.18 0
 -3 -9 -2 7.01 23.46 0
 -3 9 -2 -0.28 25.4 0
 3 -9 2 1.63 24.69 0
 3 9 2 2.09 21.89 0
 -5 9 -2 9.35 26.58 0
 5 -9 2 7.26 26.79 0
 5 9 2 2.91 21.85 0
 -5 -9 -2 2.16 22.93 0
 -5 9 -2 -7.54 27.67 0
 5 9 2 2.76 18.67 0
 5 -9 2 10.44 28.51 0
 -5 -9 -2 11.82 17.47 0
 -7 9 -2 144.67 31.02 0
 7 9 2 159.09 19.73 0
 -7 -9 -2 158.36 19.29 0
 7 -9 2 150.18 35.19 0
 7 -9 2 168.39 32.32 0
 -7 9 -2 144.22 30.64 0
 7 9 2 168.07 24.18 0
 -7 -9 -2 134.16 17.99 0
 9 -9 2 10.32 31.31 0
 -9 -9 -2 1.75 20.94 0
 9 9 2 18.71 17.55 0
 -9 9 -2 9.47 29.76 0
 9 -9 2 1.45 31.83 0
 9 9 2 9.61 16.57 0
 -9 9 -2 12.08 30.11 0
 -9 -9 -2 23.19 22.06 0
 11 9 2 170.56 17.51 0
 -11 -9 -2 157.98 18.38 0
 -11 9 -2 159.65 36.11 0
 11 9 2 163.68 18.01 0
 -11 9 -2 141.59 37.03 0
 -11 -9 -2 148.42 21.09 0
 11 -9 2 142.65 34.44 0
 11 -9 2 176.3 38.22 0
 13 -9 2 205.56 36.62 0
 13 -9 2 232.77 38.33 0
 13 9 2 215.8 17.64 0
 -13 -9 -2 244.61 17.94 0
 -13 -9 -2 210.01 18.15 0
 13 9 2 230.04 21.16 0
 -13 9 -2 182.83 33.63 0
 -13 9 -2 218.99 34.93 0
 15 9 2 247.34 17 0
 -15 -9 -2 232.9 17.2 0
 -15 9 -2 197.05 31.01 0
 -15 -9 -2 283.76 21.65 0
 15 9 2 234.37 17.32 0
 15 -9 2 258.94 33.11 0
 15 -9 2 233.64 36.56 0
 17 9 2 13.85 15.87 0
 -17 9 -2 1.16 25.33 0
 17 9 2 2.16 15.64 0
 -17 9 -2 -0.91 26.57 0
 17 -9 2 6.62 26 0
 -17 -9 -2 15.72 16.74 0
 17 -9 2 -1.59 25.63 0
 -17 -9 -2 13.48 18.8 0
 -19 9 -2 83.03 23.42 0
 19 -9 2 68.11 26.4 0
 -19 -9 -2 69.03 16.49 0
 19 9 2 96.22 16.04 0
 -19 9 -2 64.01 25.19 0
 19 9 2 76.47 16.3 0
 -19 -9 -2 99.41 16.64 0
 19 -9 2 86.25 26.21 0
 -21 9 -2 186.85 23.77 0
 21 9 2 196.64 17.37 0
 21 -9 2 195.59 25.2 0
 21 9 2 226.14 17.61 0
 -21 9 -2 226.66 25.26 0
 -21 -9 -2 253.13 17.27 0
 -21 -9 -2 208.26 17.22 0
 21 -9 2 219.29 25.71 0
 23 -9 2 175.5 24.87 0
 23 -9 2 146.7 26.98 0
 -23 -9 -2 194.92 17.19 0
 23 9 2 166.35 12.44 0
 -23 9 -2 128.33 22.58 0
 23 9 2 168.23 16.95 0
 -23 9 -2 189.42 25.04 0
 -23 -9 -2 176.52 16.22 0
 -25 9 -2 8.1 21.93 0
 -25 9 -2 8.28 18.57 0
 25 -9 2 9.95 21.51 0
 -25 -9 -2 29.98 16.12 0
 25 9 2 13.12 14.72 0
 25 9 2 13.33 13.77 0
 25 -9 2 8.99 21.99 0
 -25 -9 -2 13.45 15.44 0
 24 10 -2 -18.22 15.03 0
 24 10 -2 5.08 15.15 0
 -24 -10 2 9 16.25 0
 -24 -10 2 9.84 15.54 0
 -22 -10 2 186.57 17.73 0
 -22 -10 2 178.39 15.26 0
 22 10 -2 196.95 16.62 0
 22 10 -2 160.6 16.95 0
 -20 -10 2 13.7 15.95 0
 20 10 -2 -3.81 15.25 0
 20 10 -2 19.54 15.57 0
 -20 -10 2 14.1 15.34 0
 18 10 -2 40.8 15.45 0
 -18 -10 2 10.25 15.27 0
 -18 -10 2 40.84 15.81 0
 18 10 -2 17.72 15.67 0
 -16 -10 2 10.43 16.09 0
 16 10 -2 4.33 15.51 0
 16 10 -2 13.64 16.33 0
 -14 -10 2 10.65 14.99 0
 14 10 -2 5.15 15.16 0
 14 10 -2 4.54 15.68 0
 -14 -10 2 2.23 15.93 0
 12 10 -2 95.18 16.28 0
 12 10 -2 92.44 17.03 0
 -12 -10 2 90.61 16.99 0
 -12 -10 2 109.52 19.54 0
 10 10 -2 16.84 16.98 0
 -10 -10 2 2.5 17.14 0
 10 10 -2 10.25 16.31 0
 -10 -10 2 15.92 15.72 0
 -8 -10 2 9.38 17.22 0
 8 10 -2 8.89 19.86 0
 8 10 -2 13.22 17.52 0
 -8 -10 2 22.53 16.1 0
 -6 -10 2 14.93 21.8 0
 6 10 -2 0.37 16.18 0
 -6 -10 2 7.33 19.69 0
 6 10 -2 10.09 17.75 0
 4 10 -2 356.83 24.46 0
 -4 -10 2 368.32 21.74 0
 -4 -10 2 374.46 24.06 0
 4 10 -2 376.51 21.72 0
 2 10 -2 251.46 22.56 0
 -2 -10 2 252.8 24.42 0
 2 10 -2 237.73 21.32 0
 -2 -10 2 257.32 23.81 0
 0 10 2 120.77 27.1 0
 0 -10 -2 119.45 28.47 0
 0 10 -2 121.73 24.42 0
 0 -10 2 124.13 22.21 0
 0 -10 2 130.94 22.66 0
 0 10 2 113.03 25.12 0
 0 10 -2 110.68 22.67 0
 0 -10 -2 122.6 26.23 0
 2 -10 2 54.24 24.38 0
 -2 10 -2 66.9 26.04 0
 -2 -10 -2 56.8 22.46 0
 -2 10 -2 57.75 22.08 0
 -2 -10 -2 62.32 21.11 0
 2 -10 2 63.22 25.59 0
 2 10 2 64.57 23.22 0
 2 10 2 52.32 19.24 0
 4 10 2 15.94 19.33 0
 4 10 2 7.65 19.94 0
 -4 10 -2 7.28 25.55 0
 4 -10 2 11.12 29.23 0
 -4 -10 -2 9.64 21.1 0
 -4 10 -2 4.98 26.66 0
 4 -10 2 12.5 27.08 0
 -4 -10 -2 -4.17 21.57 0
 -6 -10 -2 161.82 22.27 0
 6 -10 2 176.86 50.78 0
 6 10 2 154.98 21.81 0
 6 10 2 153.19 20.77 0
 -6 10 -2 149.09 40.4 0
 -6 10 -2 125.91 42.09 0
 -6 -10 -2 147.39 20.37 0
 6 -10 2 128.64 47.08 0
 8 10 2 101.33 17.75 0
 -8 -10 -2 92.73 21.8 0
 8 10 2 101.57 17.86 0
 -8 -10 -2 103.2 20.28 0
 10 10 2 26.15 19.67 0
 -10 -10 -2 38.61 20.94 0
 -10 -10 -2 25.46 19.09 0
 10 10 2 48.29 19.12 0
 12 10 2 14.13 16.22 0
 -12 -10 -2 25.75 19.45 0
 -12 -10 -2 27.22 20.21 0
 12 10 2 14.28 16.49 0
 14 10 2 -10.17 15.27 0
 -14 -10 -2 -7.3 15.58 0
 14 10 2 17.55 19.5 0
 -14 -10 -2 7.21 18.93 0
 -16 -10 -2 150.75 16.2 0
 16 10 2 152.88 16.58 0
 -16 -10 -2 143.45 15.8 0
 16 10 2 134.9 15.41 0
 18 10 2 133.43 16.43 0
 -18 -10 -2 150.56 16.46 0
 -18 -10 -2 148.1 17.54 0
 18 10 2 129.42 16.22 0
 -20 -10 -2 -12.41 15.82 0
 -20 -10 -2 0.17 15.43 0
 20 10 2 6.24 15.56 0
 20 10 2 -4.72 15.09 0
 -22 -10 -2 11.59 14.97 0
 22 10 2 27.73 15.24 0
 22 10 2 23.29 16.05 0
 -22 -10 -2 11.89 16.49 0
 -19 -11 2 10.88 14.9 0
 19 11 -2 29.48 16.97 0
 -19 -11 2 29.71 17.3 0
 19 11 -2 6.91 14.93 0
 17 11 -2 139.72 16.39 0
 -17 -11 2 131.55 15.31 0
 17 11 -2 136.89 17.18 0
 -17 -11 2 127.23 17.04 0
 -15 -11 2 14.55 16.5 0
 15 11 -2 8.36 15.19 0
 -15 -11 2 17.04 15.06 0
 15 11 -2 10.83 19.53 0
 -13 -11 2 32.24 15.67 0
 -13 -11 2 21.06 19.36 0
 13 11 -2 40.87 16.8 0
 13 11 -2 22.31 16.53 0
 -11 -11 2 67.57 18.17 0
 11 11 -2 49.69 14.32 0
 11 11 -2 41.22 21.01 0
 -11 -11 2 59.27 19.32 0
 -9 -11 2 29.82 19.33 0
 9 11 -2 21.17 17.09 0
 -9 -11 2 18.28 20.59 0
 9 11 -2 13.86 15.59 0
 7 11 -2 147.47 20.41 0
 7 11 -2 142.58 21.55 0
 -7 -11 2 156.79 21.8 0
 -7 -11 2 153.32 19.99 0
 5 11 -2 16.8 18.76 0
 5 11 -2 10.97 20.62 0
 -5 -11 2 6.21 18.71 0
 -5 -11 2 17.01 20.73 0
 3 11 -2 3.38 18.52 0
 -3 -11 2 6.79 18.5 0
 3 11 -2 1.83 20.34 0
 -3 -11 2 1.85 20.67 0
 1 11 -2 -2.6 21.07 0
 1 11 -2 5.14 23.74 0
 -1 -11 2 -1.56 24.4 0
 -1 -11 2 -2.76 22.57 0
 -1 11 -2 266.25 27.3 0
 1 -11 2 309.57 25.47 0
 1 11 2 260.08 26.22 0
 -1 -11 -2 313.97 29.59 0
 -1 11 -2 295.27 29.35 0
 1 11 2 291.09 30.15 0
 -1 -11 -2 290.06 29.11 0
 1 -11 2 275.53 29.86 0
 3 11 2 1.67 19.8 0
 3 11 2 6.45 21.88 0
 3 -11 2 1.46 33.36 0
 -3 11 -2 1.61 30.4 0
 -3 -11 -2 3.05 20.81 0
 -3 11 -2 3.22 30.57 0
 3 -11 2 4.93 34.2 0
 -3 -11 -2 6.52 18.49 0
 -5 -11 -2 254.52 21.41 0
 5 11 2 248.84 22.17 0
 5 11 2 238.37 21.14 0
 -5 -11 -2 251.1 23.16 0
 7 11 2 28.98 19.28 0
 -7 -11 -2 21.65 20.57 0
 -7 -11 -2 28.85 19.78 0
 7 11 2 33.26 16.09 0
 9 11 2 63.91 17.25 0
 9 11 2 60.16 20.02 0
 -9 -11 -2 60.87 19.73 0
 -9 -11 -2 59.99 21.44 0
 -11 -11 -2 82.66 20.26 0
 11 11 2 68.54 16.19 0
 11 11 2 93.68 19.46 0
 -13 -11 -2 3.44 19.63 0
 13 11 2 25.93 19.74 0
 -13 -11 -2 5.17 16.32 0
 13 11 2 22.66 20.56 0
 -15 -11 -2 14.48 16.16 0
 15 11 2 0.55 15.8 0
 -15 -11 -2 10.49 18.78 0
 15 11 2 12.67 19.27 0
 17 11 2 53.39 14.98 0
 17 11 2 63.82 15.65 0
 -17 -11 -2 53.9 20.29 0
 -17 -11 -2 45.21 15.98 0
 14 12 -2 6.1 19.75 0
 14 12 -2 -4.87 14.82 0
 -14 -12 2 13.51 17.48 0
 -12 -12 2 491.14 20.69 0
 -12 -12 2 461.64 19.15 0
 12 12 -2 457.83 22.21 0
 12 12 -2 459.89 23.62 0
 10 12 -2 241.1 21.58 0
 10 12 -2 230.43 20.67 0
 -10 -12 2 219.75 19.89 0
 -10 -12 2 215.58 22.32 0
 8 12 -2 160.87 21.26 0
 -8 -12 2 168.64 18.22 0
 -8 -12 2 169.67 16.76 0
 8 12 -2 161.94 19.82 0
 -6 -12 2 69.36 20.93 0
 6 12 -2 73.05 21.14 0
 6 12 -2 64.18 18.2 0
 -6 -12 2 76.83 19.78 0
 4 12 -2 4.77 17.86 0
 -4 -12 2 4.77 18.33 0
 -4 -12 2 1.27 21.31 0
 4 12 -2 9.3 23.33 0
 -2 -12 2 152.36 23.29 0
 2 12 -2 99.77 21.4 0
 2 12 -2 135.45 24.57 0
 -2 -12 2 132.7 25.16 0
 0 12 -2 59.66 25.41 0
 0 -12 2 85.26 27.11 0
 0 -12 2 94.16 28.44 0
 0 12 -2 77.71 28.23 0
 2 12 2 30.95 27.28 0
 -2 -12 -2 32.97 26.76 0
 -2 -12 -2 30.8 27.79 0
 2 12 2 23.89 24.52 0
 -4 -12 -2 143.71 25.05 0
 4 12 2 148.71 23.6 0
 4 12 2 149.3 24.1 0
 -4 -12 -2 152.16 23.05 0
 6 12 2 11.86 18.88 0
 6 12 2 11.69 19.25 0
 -6 -12 -2 8.13 18.02 0
 -6 -12 -2 13.57 19.79 0
 8 12 2 38.77 19.39 0
 8 12 2 23.02 20.18 0
 -8 -12 -2 38.52 19.11 0
 -8 -12 -2 39.98 20.45 0
 10 12 2 174.15 17.58 0
 -10 -12 -2 184.97 20.45 0
 -10 -12 -2 196.43 22.11 0
 10 12 2 189.16 20.95 0
 -12 -12 -2 37.48 19.85 0
 -12 -12 -2 50.33 16.73 0
 12 12 2 34.67 20.63 0
 12 12 2 46.46 19.41 0
 37 -1 -3 22.06 14.88 0
 -37 1 3 28.83 15.04 0
 -37 -1 3 17.63 14.14 0
 -37 -1 3 20.8 15.15 0
 -37 1 3 17.34 14.89 0
 37 1 -3 18.4 14.32 0
 37 1 -3 15.85 14.02 0
 37 -1 -3 15.61 10.66 0
 35 1 -3 16.05 15.05 0
 35 1 -3 25.32 11.16 0
 -35 -1 3 3.32 14.89 0
 35 -1 -3 10.29 14.88 0
 -35 1 3 19.48 15.49 0
 -35 1 3 13.61 14.55 0
 -35 -1 3 26.13 10.7 0
 35 -1 -3 30.09 14.87 0
 33 -1 -3 64.85 15.24 0
 -33 1 3 63.48 15.45 0
 -33 1 3 87.16 16.74 0
 33 -1 -3 68.33 15.98 0
 33 1 -3 66.05 15.35 0
 -33 -1 3 57.06 15.49 0
 33 1 -3 64.46 15.49 0
 -33 -1 3 94.77 15.57 0
 31 1 -3 85.52 11.98 0
 -31 1 3 65.87 16.28 0
 -31 1 3 105.55 17.58 0
 -31 -1 3 97.37 16.72 0
 31 1 -3 84.09 16.51 0
 31 -1 -3 95.88 17.09 0
 31 -1 -3 72.52 17.27 0
 -31 -1 3 97.93 16.63 0
 29 1 -3 105.1 16.09 0
 29 -1 -3 95.56 16.75 0
 29 1 -3 102.09 16.91 0
 -29 -1 3 112.51 17.68 0
 -29 1 3 101.6 17.25 0
 29 -1 -3 114.08 17.28 0
 -29 -1 3 120.26 16.74 0
 -29 1 3 132.31 18.06 0
 27 1 -3 -2.85 16.2 0
 -27 1 3 6.71 16.94 0
 -27 1 3 6.67 18.14 0
 27 -1 -3 3.54 17.45 0
 -27 -1 3 12.87 11.61 0
 -27 -1 3 11.47 16.83 0
 27 -1 -3 6.66 12.02 0
 27 1 -3 -14.47 16 0
 -25 -1 3 87.68 18.41 0
 -25 1 3 107.6 18.45 0
 25 1 -3 102.84 18.07 0
 -25 -1 3 104.97 18.25 0
 25 -1 -3 99.11 18.15 0
 25 1 -3 83.2 17.7 0
 -25 1 3 94 18.3 0
 25 -1 -3 93.7 18.15 0
 23 1 -3 94.8 18.63 0
 23 -1 -3 114.23 18.23 0
 -23 -1 3 105.06 19.09 0
 -23 -1 3 97.76 18.76 0
 -23 1 3 126.67 18.8 0
 23 1 -3 103.31 19.01 0
 23 -1 -3 83.94 17.69 0
 -23 1 3 104.05 18.07 0
 21 -1 -3 28.97 17.13 0
 -21 1 3 40.01 17.43 0
 -21 -1 3 39.15 13.11 0
 -21 -1 3 38.99 18.78 0
 -21 1 3 29.52 17.33 0
 21 -1 -3 37.63 17.5 0
 21 1 -3 29.9 18.8 0
 21 1 -3 38.94 18.31 0
 -19 1 3 4.38 18.92 0
 19 1 -3 3.08 13.69 0
 19 -1 -3 9.1 18.98 0
 -19 1 3 10.46 18.92 0
 19 -1 -3 -0.52 18.82 0
 -19 -1 3 6.22 19.92 0
 19 1 -3 15.75 19.61 0
 -19 -1 3 4.66 14.43 0
 17 1 -3 397.76 22.98 0
 -17 1 3 436.58 24.02 0
 17 -1 -3 426.38 23.64 0
 17 -1 -3 425.08 23.94 0
 17 1 -3 457.24 23.58 0
 -17 -1 3 460.14 23.29 0
 -17 -1 3 449.13 23.82 0
 -17 1 3 479.36 24.03 0
 -15 -1 3 72.4 26.37 0
 15 1 -3 52.97 25.16 0
 -15 1 3 70.85 24.16 0
 15 1 -3 59.74 24.98 0
 -15 -1 3 59.55 17.94 0
 15 -1 -3 55.12 23.79 0
 -15 1 3 63.02 23.86 0
 15 -1 -3 81.83 23.87 0
 -13 -1 3 397.85 29.17 0
 13 1 -3 422.67 29.07 0
 13 -1 -3 369.52 28.27 0
 -13 -1 3 360.13 29.3 0
 13 1 -3 390.85 29.39 0
 13 -1 -3 344.68 27.93 0
 -13 1 3 377.75 28.91 0
 -13 1 3 374.17 29.02 0
 -11 -1 3 85.62 28.01 0
 11 1 -3 89.54 28.32 0
 11 -1 -3 83.79 26.94 0
 11 1 -3 89.07 27.55 0
 11 -1 -3 97.28 27.38 0
 -11 1 3 95.44 33.95 0
 -11 -1 3 99.37 28.01 0
 -11 1 3 87.62 27.88 0
 9 1 -3 308.79 30.55 0
 -9 -1 3 382.05 30.49 0
 9 -1 -3 346.75 30.79 0
 9 1 -3 343.92 30.24 0
 -9 1 3 333.63 30.57 0
 9 -1 -3 320.37 31.26 0
 -9 1 3 352.32 31.35 0
 -9 -1 3 319.83 30.5 0
 7 -1 -3 0.31 43.66 0
 -7 -1 3 9.05 37.4 0
 7 -1 -3 6.54 36.53 0
 -7 1 3 4.06 43.86 0
 7 1 -3 -13.82 36.96 0
 -7 -1 3 6.18 38.14 0
 -7 1 3 -2.35 43.54 0
 7 1 -3 -2.02 36.38 0
 -5 1 3 183.64 49.17 0
 5 -1 -3 181.55 48.3 0
 -5 1 3 175.73 40.85 0
 5 1 -3 169.33 42.61 0
 -5 -1 3 191.99 42.61 0
 5 -1 -3 171.63 40.97 0
 5 1 -3 191.58 43.47 0
 -3 1 3 19.62 39.51 0
 -3 1 3 20.38 45.74 0
 3 1 -3 21.4 40.69 0
 3 1 -3 20.98 40.2 0
 3 -1 -3 30.06 46.07 0
 3 -1 -3 24.45 45.16 0
 -3 -1 3 24.57 41.34 0
 -3 -1 3 19.43 39.43 0
 1 -1 -3 558.64 44.19 0
 1 1 -3 547.56 43.49 0
 -1 1 3 542.47 46.41 0
 1 -1 -3 555.18 45.12 0
 -1 -1 3 552.74 44.21 0
 -1 1 3 546.89 44.3 0
 1 1 -3 551.07 33.22 0
 -1 -1 3 564.13 42.7 0
 -1 -1 -3 36.91 41.64 0
 1 -1 3 45.93 40.72 0
 1 -1 3 40.83 39.16 0
 1 1 3 52.19 43.98 0
 -1 -1 -3 40.59 42.26 0
 -1 1 -3 37.48 39.85 0
 -1 1 -3 37.17 41.53 0
 1 1 3 43.08 41.14 0
 -3 1 -3 272.81 41.07 0
 3 -1 3 247.96 39.12 0
 3 1 3 258.73 41.12 0
 3 -1 3 271.98 39.67 0
 -3 -1 -3 245.59 39.46 0
 -3 -1 -3 284.66 40.51 0
 -3 1 -3 260.83 38.91 0
 3 1 3 232.92 40.15 0
 -5 1 -3 16.07 31.58 0
 -5 -1 -3 10.92 32.77 0
 5 -1 3 35.3 33.35 0
 5 1 3 34.2 32.57 0
 -5 -1 -3 22.5 32.02 0
 5 1 3 25.47 32.51 0
 5 -1 3 47.97 31.87 0
 -5 1 -3 25.53 32.29 0
 7 1 3 13.06 19.62 0
 -7 -1 -3 -0.53 28.42 0
 7 -1 3 7.18 28.07 0
 -7 -1 -3 -0.75 19.19 0
 -7 1 -3 18.24 28.77 0
 7 -1 3 -2.27 28.16 0
 -7 1 -3 5.28 27.56 0
 7 1 3 2.39 27.05 0
 -9 1 -3 46.19 18.42 0
 9 -1 3 39.44 19.69 0
 -9 -1 -3 40.51 20.32 0
 9 -1 3 49.51 26.89 0
 9 1 3 42.39 20.52 0
 -9 -1 -3 28.91 28.34 0
 9 1 3 34.86 27.81 0
 -9 1 -3 51.62 27.35 0
 -11 -1 -3 204.7 30.17 0
 -11 1 -3 218.8 27.82 0
 -11 1 -3 209.06 26.48 0
 11 -1 3 229.45 27.15 0
 11 -1 3 199.87 26.99 0
 11 1 3 187.34 28.13 0
 11 1 3 205.44 29.63 0
 -11 -1 -3 171.85 28.9 0
 13 1 3 9.51 24.09 0
 13 -1 3 30.12 21.92 0
 13 1 3 18.28 16.36 0
 -13 -1 -3 18.35 24.23 0
 -13 1 -3 11.77 22.63 0
 -13 1 -3 22.2 22.1 0
 -13 -1 -3 20.45 23.81 0
 13 -1 3 19.19 22.12 0
 15 -1 3 50.24 20.3 0
 -15 -1 -3 47.8 20.46 0
 15 -1 3 63.97 20.95 0
 -15 1 -3 59.82 21.25 0
 15 1 3 56.78 20.78 0
 15 1 3 41.09 19.65 0
 -15 1 -3 59.53 20.79 0
 -15 -1 -3 78.28 20.51 0
 17 -1 3 168.61 20.66 0
 -17 -1 -3 177.17 21.22 0
 17 1 3 163.73 14.68 0
 -17 1 -3 179.37 21.58 0
 17 -1 3 128.26 19.65 0
 -17 -1 -3 153.97 20.39 0
 -17 1 -3 160.53 20.53 0
 17 1 3 133.58 20.34 0
 19 1 3 -8.37 18.27 0
 19 -1 3 10.57 12.34 0
 -19 1 -3 12.31 18.55 0
 19 -1 3 9.06 19.02 0
 -19 1 -3 -1.19 13.33 0
 -19 -1 -3 7.33 19.03 0
 -19 -1 -3 10.84 18.79 0
 19 1 3 4.13 17.82 0
 21 1 3 6.63 17.72 0
 21 1 3 10.39 18.06 0
 21 -1 3 -9.63 12.57 0
 -21 -1 -3 -5 18.25 0
 -21 1 -3 7.1 18.45 0
 -21 1 -3 5.82 17.19 0
 21 -1 3 10.12 17.31 0
 -21 -1 -3 2.14 17.31 0
 -23 1 -3 7.9 17.45 0
 -23 -1 -3 12.09 16.59 0
 -23 -1 -3 5.92 12.31 0
 23 -1 3 11.98 17.54 0
 23 1 3 12.43 16.77 0
 -23 1 -3 9.18 18.08 0
 23 -1 3 6.32 17.52 0
 23 1 3 2.92 16.1 0
 -25 -1 -3 23.22 16.76 0
 25 -1 3 15.06 15.54 0
 -25 1 -3 16.94 16.49 0
 -25 1 -3 0.52 15.23 0
 25 -1 3 32.6 15.85 0
 -25 -1 -3 14.81 17.38 0
 25 1 3 11.5 16.28 0
 25 1 3 -5.49 17.13 0
 27 1 3 12.41 15.93 0
 -27 -1 -3 20.49 17.11 0
 -27 1 -3 28.24 15.74 0
 -27 1 -3 -3.68 17.23 0
 27 1 3 5.34 15.98 0
 27 -1 3 -10.62 16.24 0
 -27 -1 -3 8.16 16.19 0
 27 -1 3 6.8 16.04 0
 -29 -1 -3 18.57 14.38 0
 29 1 3 8.61 15.06 0
 -29 -1 -3 22.19 15.33 0
 -29 1 -3 11.33 15.54 0
 29 -1 3 1.4 15.16 0
 29 1 3 3.31 15.31 0
 29 -1 3 15.41 16.32 0
 -29 1 -3 6.86 15.66 0
 31 -1 3 -7.91 10.48 0
 31 1 3 11.49 14.79 0
 -31 1 -3 21.61 15.53 0
 31 1 3 13.88 15.18 0
 -31 -1 -3 10.16 14.57 0
 -31 1 -3 24.72 15.15 0
 31 -1 3 4.23 15.31 0
 -31 -1 -3 19.79 16 0
 33 1 3 20.67 10.77 0
 33 1 3 32 10.57 0
 -33 1 -3 22.13 14.61 0
 33 -1 3 29.76 15.33 0
 -33 -1 -3 15.48 14.88 0
 33 -1 3 39.05 14.93 0
 -33 -1 -3 5.09 14.69 0
 -33 1 -3 33.75 11.12 0
 -35 1 -3 8.39 15.23 0
 35 -1 3 -0.99 14.53 0
 -35 -1 -3 19.01 14.24 0
 -35 -1 -3 19.9 15.28 0
 35 1 3 1.96 10.4 0
 35 -1 3 20.34 14.77 0
 35 1 3 -0.33 14.72 0
 -35 1 -3 9.94 13.95 0
 -38 2 3 1.08 11.88 0
 38 2 -3 23.44 13.9 0
 38 -2 -3 -9.62 15.67 0
 -38 2 3 -9.01 15.5 0
 38 2 -3 -7.12 13.43 0
 -38 -2 3 -10.18 13.61 0
 -38 -2 3 -3.29 14.47 0
 38 -2 -3 25.81 15.33 0
 36 2 -3 7.97 14.31 0
 -36 2 3 -9.93 14.76 0
 -36 -2 3 7.94 14.68 0
 36 -2 -3 -7.84 14.93 0
 -36 2 3 -27.28 15.74 0
 36 -2 -3 5.95 14.85 0
 -36 -2 3 -8.18 14.53 0
 36 2 -3 -6.22 9.98 0
 -34 2 3 44.77 15.44 0
 34 -2 -3 26.9 15.28 0
 -34 -2 3 18.91 14.35 0
 -34 -2 3 14.84 15.66 0
 -34 2 3 41.03 16.48 0
 34 2 -3 23.05 10.17 0
 34 2 -3 21.87 15.25 0
 34 -2 -3 29.38 15.1 0
 -32 -2 3 52.22 15.44 0
 32 -2 -3 25.43 15.84 0
 -32 2 3 49.69 16.31 0
 -32 -2 3 30.45 15.11 0
 32 2 -3 70.96 15.34 0
 32 -2 -3 47.38 15.79 0
 -32 2 3 42.95 16.69 0
 32 2 -3 35.05 14.97 0
 30 -2 -3 43.46 16.54 0
 -30 2 3 57.85 17.81 0
 -30 -2 3 45.26 11.85 0
 30 2 -3 49.54 16.8 0
 -30 2 3 58.24 16.47 0
 -30 -2 3 40.99 17.32 0
 30 2 -3 46.5 11.07 0
 30 -2 -3 40.7 16.75 0
 28 -2 -3 7.49 16.86 0
 -28 -2 3 -5.53 11.98 0
 28 -2 -3 14.39 17.19 0
 -28 2 3 5.71 16.9 0
 28 2 -3 12.45 16.83 0
 28 2 -3 2.37 11.16 0
 -28 2 3 16.53 21.53 0
 -28 -2 3 3.33 17.13 0
 26 2 -3 5.73 11.56 0
 -26 -2 3 16.99 12.09 0
 26 -2 -3 13.1 17 0
 -26 2 3 35.54 18.83 0
 26 2 -3 20.9 16.71 0
 -26 -2 3 11.6 17.07 0
 -26 2 3 17.85 17.44 0
 26 -2 -3 27.38 18.16 0
 24 -2 -3 117.7 17.55 0
 -24 -2 3 123.32 19.5 0
 24 -2 -3 102.45 17.73 0
 -24 -2 3 142.83 19 0
 -24 2 3 110.38 18.34 0
 -24 2 3 140.38 23.18 0
 24 2 -3 110.69 19.03 0
 24 2 -3 129.21 18.26 0
 22 2 -3 4.54 18.2 0
 -22 -2 3 13.74 18.87 0
 22 -2 -3 0.72 17.41 0
 22 -2 -3 5.64 17.11 0
 -22 -2 3 18.34 19.05 0
 22 2 -3 3.29 18.71 0
 -22 2 3 9.54 17.43 0
 -22 2 3 16.48 17.34 0
 -20 2 3 53.45 18.76 0
 20 -2 -3 36.71 17.97 0
 -20 -2 3 50.05 19.12 0
 20 2 -3 52.71 19.33 0
 -20 -2 3 47.3 19.05 0
 20 2 -3 50.3 18.75 0
 -20 2 3 32.94 17.71 0
 20 -2 -3 33.37 17.71 0
 -18 2 3 26 25.24 0
 18 2 -3 22.78 19.28 0
 18 -2 -3 35.37 20.34 0
 -18 -2 3 20.95 13.43 0
 -18 2 3 21.92 20.58 0
 18 2 -3 16.1 13.91 0
 18 -2 -3 26.64 20.02 0
 -18 -2 3 28.72 18.71 0
 -16 2 3 52.55 22.26 0
 -16 2 3 61.79 27.46 0
 16 -2 -3 54.16 22.24 0
 16 2 -3 56.68 21.6 0
 16 2 -3 84.46 21.54 0
 -16 -2 3 62.68 21.67 0
 -16 -2 3 39.23 22.03 0
 16 -2 -3 55.9 21.81 0
 -14 2 3 4.23 24.91 0
 14 -2 -3 -1.5 29.48 0
 -14 2 3 4.06 23.29 0
 14 2 -3 8.61 17.96 0
 -14 -2 3 12.94 26.35 0
 14 -2 -3 6.76 23.86 0
 -14 -2 3 7.9 18.48 0
 14 2 -3 16.79 25.91 0
 12 2 -3 20.02 27.52 0
 -12 -2 3 12.13 28 0
 -12 2 3 18.74 27.01 0
 12 -2 -3 17.89 30.85 0
 12 -2 -3 19.04 30.3 0
 12 2 -3 20.85 28.01 0
 -12 2 3 19.95 31.23 0
 -12 -2 3 12.92 27.49 0
 -10 2 3 186.64 25.99 0
 10 -2 -3 196.52 25.46 0
 10 2 -3 202.85 28.22 0
 10 2 -3 197.02 27.59 0
 10 -2 -3 179.02 31.1 0
 -10 -2 3 223.59 28.28 0
 -10 2 3 218.67 31.68 0
 -10 -2 3 198.62 28.04 0
 8 2 -3 84.28 28.25 0
 8 2 -3 67.74 30.43 0
 -8 -2 3 79.81 29.14 0
 8 -2 -3 80.27 33.1 0
 8 -2 -3 72.48 33.32 0
 -8 -2 3 84.62 28.62 0
 -8 2 3 78.64 34.17 0
 -8 2 3 71.05 32.75 0
 6 -2 -3 -3.37 33.21 0
 -6 2 3 4.52 34.61 0
 -6 -2 3 4.95 31.24 0
 6 -2 -3 -1.3 37.09 0
 -6 2 3 -0.79 36.71 0
 6 2 -3 -1.98 31.43 0
 6 2 -3 9.11 30.23 0
 -6 -2 3 3.52 31.15 0
 4 2 -3 235.23 36.38 0
 -4 -2 3 246.99 25.79 0
 4 -2 -3 223.31 46.94 0
 -4 2 3 234.37 41.26 0
 4 -2 -3 214.52 41.42 0
 4 2 -3 231.18 35.26 0
 -4 -2 3 252.38 35.24 0
 -4 2 3 238.93 46.47 0
 2 2 -3 19.37 34.89 0
 2 -2 -3 18.76 42.5 0
 -2 -2 3 10.64 35.48 0
 -2 2 3 18.78 41.64 0
 2 2 -3 8.99 36.86 0
 -2 2 3 20.04 45.12 0
 2 -2 -3 14.19 45.47 0
 -2 -2 3 19.52 36.12 0
 0 -2 -3 122.97 46.55 0
 0 2 -3 134.17 34.49 0
 0 -2 -3 114.08 45.2 0
 0 -2 3 130.21 34.72 0
 0 2 3 124.46 46.27 0
 0 2 -3 139.79 36.03 0
 0 -2 3 138.79 34.76 0
 0 2 3 128.7 36.24 0
 2 -2 3 218.11 33.01 0
 -2 2 -3 205.64 32.57 0
 -2 2 -3 205.74 31.29 0
 -2 -2 -3 207.17 34.75 0
 -2 -2 -3 198.99 35.13 0
 2 2 3 196.54 35.43 0
 2 -2 3 199.16 31.24 0
 2 2 3 201.87 33.91 0
 -4 -2 -3 6.39 29.85 0
 4 2 3 1.91 28.99 0
 -4 2 -3 -5.37 27.49 0
 4 2 3 1 21.18 0
 -4 2 -3 1.89 28.47 0
 4 -2 3 6.18 27.31 0
 4 -2 3 1.04 27.6 0
 -4 -2 -3 -2.24 29.45 0
 6 2 3 126.34 30.35 0
 -6 2 -3 112.72 26.88 0
 6 -2 3 121.12 27.43 0
 -6 -2 -3 123.4 29.56 0
 6 -2 3 120.71 27.36 0
 -6 2 -3 124.31 27.7 0
 -6 -2 -3 113.29 30.21 0
 6 2 3 108.38 27.87 0
 8 2 3 112.73 27.85 0
 8 2 3 107.83 28.68 0
 8 -2 3 94.58 26.59 0
 -8 2 -3 108.84 27.03 0
 8 -2 3 108.27 27.03 0
 -8 -2 -3 82.75 27.98 0
 -8 -2 -3 105.99 20.93 0
 -8 2 -3 94.35 25.9 0
 10 -2 3 26.57 24.93 0
 10 2 3 33.4 28.67 0
 -10 -2 -3 14.54 19.65 0
 10 -2 3 36.64 25.9 0
 -10 -2 -3 33.21 28.62 0
 -10 2 -3 28.36 24.79 0
 10 2 3 24.47 18.73 0
 -10 2 -3 23.66 25.84 0
 12 -2 3 187.07 23.14 0
 12 2 3 173.7 23.83 0
 -12 2 -3 169.38 22.63 0
 -12 -2 -3 175.82 24.99 0
 -12 2 -3 181.94 23.93 0
 -12 -2 -3 145.64 17.76 0
 12 -2 3 159.17 22.73 0
 12 2 3 182.95 25.16 0
 14 -2 3 13.38 20.39 0
 -14 2 -3 2.26 19.65 0
 -14 -2 -3 3.18 20.09 0
 -14 -2 -3 13.08 20.88 0
 -14 2 -3 18.52 21.45 0
 14 2 3 -2.03 14.3 0
 14 -2 3 -2.9 19.66 0
 14 2 3 1.83 13.91 0
 -16 2 -3 160.93 19.45 0
 -16 -2 -3 159.54 21.35 0
 16 -2 3 129.22 18.96 0
 16 -2 3 130.41 18.55 0
 -16 2 -3 131.17 18.54 0
 16 2 3 141.49 14.75 0
 16 2 3 128.62 20.58 0
 -16 -2 -3 128.13 19.98 0
 -18 -2 -3 206.76 19.63 0
 18 -2 3 239.27 18.54 0
 -18 2 -3 272.52 20.34 0
 18 -2 3 234.01 17.94 0
 18 2 3 240.39 14.83 0
 -18 2 -3 214.48 19.24 0
 -18 -2 -3 259.24 20.44 0
 18 2 3 229.94 19.49 0
 -20 2 -3 15.25 18.76 0
 -20 -2 -3 4.26 13.4 0
 20 2 3 11.05 18.58 0
 20 -2 3 10.09 17.43 0
 -20 -2 -3 -0.1 13.52 0
 20 2 3 -9.29 19.3 0
 -20 2 -3 1.9 12.76 0
 20 -2 3 12.41 12.06 0
 22 -2 3 3.61 18.01 0
 -22 2 -3 25.78 17.51 0
 -22 -2 -3 2.79 17.25 0
 -22 2 -3 8.78 18.85 0
 -22 -2 -3 1.14 18.34 0
 22 2 3 11.56 17.91 0
 22 2 3 7.64 17.19 0
 22 -2 3 9.69 18.54 0
 24 -2 3 77.65 17.34 0
 -24 2 -3 98.3 18.43 0
 -24 2 -3 73.24 17.36 0
 24 2 3 93.34 18.44 0
 24 -2 3 77.14 17.64 0
 24 2 3 83.97 17.5 0
 -24 -2 -3 104.17 18.42 0
 -24 -2 -3 59.17 17.65 0
 -26 2 -3 33.03 17.48 0
 26 2 3 20.48 16.56 0
 -26 -2 -3 33.64 16.52 0
 -26 2 -3 8.23 16.44 0
 -26 -2 -3 19.18 16.95 0
 26 2 3 26.74 16.82 0
 26 -2 3 18.68 16.69 0
 26 -2 3 13.93 16.81 0
 28 -2 3 61.18 16.24 0
 28 2 3 45.82 11.4 0
 -28 -2 -3 37.8 15.33 0
 -28 2 -3 54.45 16.48 0
 -28 2 -3 52.57 17.58 0
 -28 -2 -3 40.72 16.29 0
 28 -2 3 66.61 16.94 0
 28 2 3 49.98 15.46 0
 -30 -2 -3 -4.26 15.38 0
 30 2 3 2.12 15.55 0
 30 -2 3 12.8 11.27 0
 -30 -2 -3 16.25 11.24 0
 30 2 3 7.04 11 0
 -30 2 -3 25.81 16.31 0
 -30 2 -3 22.86 14.97 0
 30 -2 3 17.51 15.76 0
 32 2 3 18.86 14.73 0
 -32 2 -3 32.4 15.56 0
 -32 -2 -3 16.86 15.57 0
 -32 2 -3 43.61 13.8 0
 32 2 3 13.42 15.04 0
 -32 -2 -3 44.92 14.75 0
 32 -2 3 31.13 14.78 0
 32 -2 3 17.04 15.27 0
 34 2 3 55.85 14.16 0
 34 -2 3 57.72 15.49 0
 34 -2 3 64.09 14.45 0
 -34 2 -3 62.63 16.24 0
 -34 2 -3 49.67 14.16 0
 -34 -2 -3 68.22 15.73 0
 -34 -2 -3 49.01 14.51 0
 34 2 3 58.02 14.52 0
 -37 -3 3 9.7 14.74 0
 37 3 -3 21.22 14.44 0
 37 -3 -3 16.95 15.64 0
 37 -3 -3 12.27 15.14 0
 -37 3 3 21.7 16.38 0
 -37 -3 3 25.48 14.71 0
 -37 3 3 1.73 14.94 0
 37 3 -3 26.47 14.53 0
 -35 -3 3 55.14 15.14 0
 -35 3 3 49.37 16.73 0
 35 -3 -3 58.26 16.15 0
 35 3 -3 49.42 10.86 0
 -35 -3 3 60.45 14.94 0
 -35 3 3 61.88 16.26 0
 35 3 -3 63.65 14.76 0
 35 -3 -3 61.67 15.07 0
 -33 -3 3 30.88 15.82 0
 -33 -3 3 49.8 16.41 0
 -33 3 3 43.58 16.38 0
 -33 3 3 33.77 15.05 0
 33 3 -3 27.26 16.02 0
 33 3 -3 28.69 15.42 0
 33 -3 -3 12.62 15.74 0
 33 -3 -3 19.71 15.37 0
 31 3 -3 3.54 11.06 0
 -31 3 3 4.84 16.06 0
 31 3 -3 5.31 14.86 0
 -31 -3 3 -0.29 15.03 0
 -31 -3 3 1.8 15.35 0
 -31 3 3 16.11 18.16 0
 31 -3 -3 9.13 14.59 0
 31 -3 -3 13.83 15.23 0
 29 -3 -3 16.58 15.86 0
 -29 -3 3 29.7 15.63 0
 -29 3 3 2.95 17.23 0
 29 -3 -3 21.96 16.35 0
 -29 3 3 21.11 15.86 0
 29 3 -3 24.09 17.34 0
 -29 -3 3 12.24 17.09 0
 29 3 -3 21.02 16.28 0
 -27 -3 3 1.22 11.64 0
 -27 3 3 5.28 17.54 0
 27 -3 -3 -2.5 16.75 0
 27 -3 -3 -3.37 16.76 0
 27 3 -3 26.36 16.96 0
 -27 -3 3 21.67 17.84 0
 27 3 -3 -2.2 17.28 0
 -27 3 3 -4.95 16.56 0
 -25 3 3 55.54 18.81 0
 -25 -3 3 29.65 12.29 0
 -25 3 3 24.7 16.83 0
 25 3 -3 23.45 17.09 0
 -25 -3 3 34.84 17.17 0
 25 3 -3 37.04 16.99 0
 25 -3 -3 29.83 20.49 0
 25 -3 -3 26.17 17.27 0
 -23 3 3 79.79 22.63 0
 23 -3 -3 110.74 23.24 0
 -23 -3 3 91.37 18.58 0
 23 -3 -3 85.72 18.56 0
 23 3 -3 113.59 12.88 0
 -23 3 3 103.13 19.54 0
 -23 -3 3 98.39 18.54 0
 23 3 -3 90.94 14.39 0
 21 3 -3 173.4 18.55 0
 -21 -3 3 169.07 19.15 0
 -21 3 3 182.83 19.44 0
 -21 -3 3 168.1 19.29 0
 21 -3 -3 152.01 18.85 0
 21 3 -3 151.71 18.96 0
 -21 3 3 147.88 18.49 0
 21 -3 -3 154.92 19.19 0
 19 3 -3 113.82 13.53 0
 -19 3 3 109.72 20.48 0
 -19 -3 3 95.92 19.2 0
 19 -3 -3 83.61 19.62 0
 19 -3 -3 105.06 19.74 0
 19 3 -3 102.85 19.01 0
 -19 -3 3 105.2 19.33 0
 -19 3 3 97.39 20.26 0
 -17 3 3 14.36 24.19 0
 -17 3 3 4.43 21.53 0
 -17 -3 3 22.58 13.37 0
 17 -3 -3 11.99 20.32 0
 17 3 -3 17.61 19.01 0
 17 3 -3 27.27 18.45 0
 -17 -3 3 22.3 19.07 0
 17 -3 -3 11.84 19.79 0
 15 3 -3 14.61 21.16 0
 -15 3 3 21.69 27.54 0
 15 -3 -3 27.67 27.11 0
 -15 -3 3 16.59 20.95 0
 15 3 -3 12.57 20.44 0
 -15 -3 3 30.59 21.12 0
 -15 3 3 26.57 26.65 0
 15 -3 -3 9.8 26.77 0
 -13 -3 3 14.11 23.98 0
 -13 3 3 7.4 29.79 0
 -13 -3 3 4.31 23.74 0
 13 3 -3 2.47 23.96 0
 13 -3 -3 13.81 28.7 0
 13 -3 -3 12.12 28.08 0
 -13 3 3 6.15 29.08 0
 13 3 -3 10.29 23.37 0
 11 -3 -3 26.46 32.18 0
 -11 3 3 14.88 30.77 0
 11 3 -3 33.44 26.59 0
 11 -3 -3 27.53 31.7 0
 11 3 -3 13.34 19.94 0
 -11 3 3 29.91 32.97 0
 -11 -3 3 45.26 26.17 0
 -11 -3 3 30.42 27.18 0
 9 3 -3 79.42 26.99 0
 -9 -3 3 102.68 26.99 0
 9 -3 -3 80.22 40.13 0
 -9 -3 3 111.63 27.34 0
 -9 3 3 77.92 36.72 0
 9 -3 -3 86.14 34.9 0
 9 3 -3 72.7 19.09 0
 -9 3 3 95.36 39.43 0
 7 -3 -3 629.44 57.79 0
 -7 3 3 837.59 60.1 0
 -7 3 3 659.9 50.34 0
 -7 -3 3 771.47 31.06 0
 7 3 -3 782.38 30.69 0
 7 -3 -3 757.14 53.55 0
 -7 -3 3 785.61 30.31 0
 7 3 -3 748.93 31.08 0
 -5 -3 3 556.52 30.13 0
 5 3 -3 524.32 30.51 0
 -5 -3 3 586.64 29.92 0
 5 3 -3 562 29.59 0
 -5 3 3 593.69 68.93 0
 5 -3 -3 548.73 69.53 0
 -3 -3 3 49.58 25.2 0
 3 -3 -3 50.32 43.39 0
 -3 -3 3 56.67 26.51 0
 3 3 -3 65.12 26.49 0
 3 3 -3 55.71 25.75 0
 -3 3 3 49.59 38.08 0
 -3 3 3 51.9 33.52 0
 3 -3 -3 51.46 39.18 0
 1 3 -3 233.53 26.11 0
 -1 -3 3 227.54 27.11 0
 -1 3 3 226.36 33.83 0
 -1 -3 3 247.9 26.03 0
 1 -3 -3 225.24 34.86 0
 1 3 -3 250.61 26.96 0
 1 -3 -3 213.26 36.29 0
 -1 3 3 229.54 36.26 0
 -1 -3 -3 82.59 27 0
 -1 3 -3 82.09 25.29 0
 1 3 3 83.29 27.16 0
 -1 -3 -3 96.51 27.4 0
 1 -3 3 86.88 24.61 0
 1 3 3 88.78 26.61 0
 -1 3 -3 88 24.37 0
 1 -3 3 84.12 24.1 0
 3 -3 3 32.13 24.67 0
 3 -3 3 40.83 24.92 0
 3 3 3 47.08 26.58 0
 3 3 3 33.8 34.43 0
 -3 -3 -3 43.01 28.42 0
 -3 -3 -3 37.96 26.81 0
 -3 3 -3 39.01 23.87 0
 -3 3 -3 40.7 25.51 0
 -5 3 -3 2.54 23.44 0
 5 3 3 7.68 26.46 0
 -5 -3 -3 -4.02 27.57 0
 5 -3 3 2.29 23.34 0
 -5 3 -3 -1.34 25.26 0
 5 3 3 11.39 27.38 0
 5 -3 3 3.07 24.89 0
 -5 -3 -3 -4.41 26.41 0
 7 -3 3 642.46 29.52 0
 7 3 3 591.56 30.57 0
 7 3 3 558.87 28.8 0
 -7 -3 -3 571.06 30.16 0
 -7 -3 -3 637.76 30.56 0
 7 -3 3 569.99 28.54 0
 -7 3 -3 651.94 29.93 0
 -7 3 -3 566.68 28.14 0
 9 -3 3 6.72 23.46 0
 -9 -3 -3 12.16 25.75 0
 -9 3 -3 6.7 22.25 0
 9 3 3 -1.22 17.63 0
 9 -3 3 -4.71 27.64 0
 9 3 3 14.93 24.38 0
 -9 -3 -3 12.26 23.54 0
 -9 3 -3 6.52 23.37 0
 11 -3 3 380.7 23.88 0
 11 -3 3 432.26 25.71 0
 -11 -3 -3 385.4 24.09 0
 11 3 3 364.47 23.34 0
 -11 3 -3 446.72 24.69 0
 -11 -3 -3 433.37 24.87 0
 -11 3 -3 389.37 24.01 0
 11 3 3 415.58 24.31 0
 -13 -3 -3 12.77 14.46 0
 -13 -3 -3 4.11 14.44 0
 -13 3 -3 18.67 24.36 0
 13 3 3 8.52 19.63 0
 13 -3 3 16.72 20.53 0
 -13 3 -3 27.17 18.99 0
 13 3 3 15.19 20.62 0
 13 -3 3 16.5 19.49 0
 15 -3 3 105.65 18.59 0
 15 3 3 119.88 20.14 0
 -15 3 -3 106.62 18.92 0
 15 3 3 104.84 18.85 0
 15 -3 3 99.49 18.9 0
 -15 -3 -3 118.36 20.1 0
 -15 -3 -3 105.3 19.65 0
 -15 3 -3 109.36 18.41 0
 -17 -3 -3 213.12 19.72 0
 -17 3 -3 213.47 21.44 0
 -17 -3 -3 232.25 20.18 0
 17 -3 3 194.63 19.26 0
 -17 3 -3 243.44 19.5 0
 17 3 3 224.09 20.26 0
 17 3 3 199.68 19.85 0
 17 -3 3 184.61 18.18 0
 -19 3 -3 222.64 19.28 0
 -19 3 -3 183.97 18.73 0
 19 -3 3 195.62 18.85 0
 19 -3 3 201.94 18.22 0
 -19 -3 -3 175.25 13.84 0
 -19 -3 -3 210.2 20.88 0
 19 3 3 182.56 13.77 0
 19 3 3 217.65 19.52 0
 -21 -3 -3 10.86 17.25 0
 -21 3 -3 30.17 19.9 0
 -21 -3 -3 26.78 17.78 0
 -21 3 -3 27.56 17.23 0
 21 -3 3 28.84 17.78 0
 21 3 3 30.39 17.64 0
 21 3 3 19.19 18.34 0
 21 -3 3 21.55 17.65 0
 23 3 3 125.91 18.21 0
 23 -3 3 101.4 18.18 0
 -23 3 -3 128.76 17.96 0
 -23 -3 -3 133.53 18.7 0
 23 -3 3 111.65 18 0
 -23 -3 -3 112.36 17.77 0
 23 3 3 130.19 17.61 0
 -23 3 -3 142.43 18.57 0
 -25 -3 -3 45.21 16.5 0
 25 -3 3 46.69 17.54 0
 -25 3 -3 55.64 17.58 0
 25 -3 3 61.94 17.25 0
 -25 -3 -3 66.02 17.3 0
 25 3 3 58.29 17.82 0
 25 3 3 65.65 16.37 0
 -25 3 -3 53.58 16.6 0
 27 3 3 70.77 16.25 0
 27 3 3 62.13 15.95 0
 -27 -3 -3 92.94 15.82 0
 27 -3 3 85.91 16.61 0
 -27 3 -3 83.85 15.43 0
 -27 3 -3 106.37 17.09 0
 -27 -3 -3 80.81 15.39 0
 27 -3 3 77.24 17.77 0
 29 3 3 74.86 15.37 0
 -29 -3 -3 74.92 16.22 0
 29 3 3 44.14 10.87 0
 -29 3 -3 83.15 17 0
 29 -3 3 26.45 15.5 0
 -29 3 -3 57.41 16.16 0
 -29 -3 -3 68.52 15.85 0
 29 -3 3 72.48 16.1 0
 -31 -3 -3 10.85 14.97 0
 -31 3 -3 9.26 15.25 0
 31 -3 3 12.08 14.11 0
 -31 -3 -3 13.36 14.73 0
 31 -3 3 7.3 14.6 0
 31 3 3 17.03 10.48 0
 31 3 3 0.1 15.58 0
 -31 3 -3 15.88 14.53 0
 33 3 3 23.3 14.83 0
 -33 3 -3 36.3 15.11 0
 33 -3 3 25.3 15.99 0
 33 3 3 49.92 15.28 0
 -33 -3 -3 40.87 16.03 0
 -33 -3 -3 30.73 14.75 0
 33 -3 3 28.07 16.01 0
 -33 3 -3 33.78 15.42 0
 36 -4 -3 8.36 18.92 0
 36 4 -3 21.63 10.43 0
 36 -4 -3 24.55 15.46 0
 -36 -4 3 10.59 15.53 0
 -36 4 3 25.19 15.98 0
 -36 4 3 13.97 15.64 0
 -36 -4 3 22 10.57 0
 36 4 -3 46.22 14.96 0
 34 -4 -3 94.59 16.17 0
 34 4 -3 98.44 15.29 0
 -34 -4 3 90.94 15.61 0
 -34 -4 3 90.75 15.13 0
 -34 4 3 84.37 15.97 0
 34 4 -3 93.8 15.25 0
 34 -4 -3 73.25 16.24 0
 -34 4 3 130.76 16.21 0
 -32 4 3 1.11 18.93 0
 -32 4 3 2.74 16.33 0
 32 4 -3 -18.52 15.66 0
 32 -4 -3 0.87 15.23 0
 -32 -4 3 -4.28 11.33 0
 -32 -4 3 -1.91 15.88 0
 32 -4 -3 3.23 15.3 0
 32 4 -3 -13.08 15.97 0
 -30 -4 3 11.79 14.84 0
 30 -4 -3 30.52 15.56 0
 -30 4 3 23.56 16.17 0
 -30 4 3 24.47 17.39 0
 30 4 -3 30.66 15.38 0
 -30 -4 3 43.4 16.04 0
 30 -4 -3 25.51 16.02 0
 30 4 -3 29.72 14.72 0
 -28 -4 3 1.69 16.01 0
 28 -4 -3 4.94 20.06 0
 28 -4 -3 12.33 17.01 0
 28 4 -3 2.46 16.11 0
 -28 -4 3 12.29 12.18 0
 -28 4 3 1.98 17.87 0
 28 4 -3 8.95 16.79 0
 -28 4 3 9.7 19.17 0
 26 -4 -3 60.8 16.66 0
 26 4 -3 48.58 17.14 0
 -26 4 3 69.98 18.3 0
 26 -4 -3 75.55 20.68 0
 -26 -4 3 61.73 17.04 0
 -26 -4 3 69.98 17.03 0
 -26 4 3 65.38 17.04 0
 26 4 -3 66.8 12.31 0
 -24 -4 3 40.45 17.06 0
 24 4 -3 28.8 17.15 0
 -24 4 3 38.83 17.04 0
 -24 4 3 36.82 17.77 0
 24 -4 -3 18.94 20.19 0
 24 4 -3 32.43 16.53 0
 24 -4 -3 43.59 20.03 0
 -24 -4 3 46.24 17.01 0
 -22 -4 3 18.09 17.54 0
 22 4 -3 -15.39 17.27 0
 -22 4 3 3.32 18.38 0
 22 4 -3 7.31 18.15 0
 -22 4 3 -1.36 19.54 0
 -22 -4 3 6.67 12.41 0
 22 -4 -3 -7.77 18.33 0
 22 -4 -3 3.93 18.29 0
 20 -4 -3 5.87 18.55 0
 20 4 -3 38.51 18.15 0
 -20 -4 3 21.13 13.5 0
 -20 4 3 4.58 19.93 0
 20 -4 -3 7.21 18.25 0
 -20 -4 3 32.66 18.57 0
 -20 4 3 23.04 18.49 0
 20 4 -3 13.35 12.58 0
 -18 4 3 173.87 21.28 0
 18 4 -3 142.59 13.91 0
 18 -4 -3 143.79 19.89 0
 -18 4 3 152.5 24.61 0
 -18 -4 3 166.64 19.64 0
 18 4 -3 143.11 19.02 0
 -18 -4 3 152.17 19.07 0
 18 -4 -3 132.95 20.39 0
 16 4 -3 45.07 19.11 0
 16 -4 -3 32.29 25.04 0
 -16 4 3 38.63 22.02 0
 -16 -4 3 21.08 19.14 0
 -16 -4 3 28.55 19.56 0
 16 4 -3 32.71 19.33 0
 16 -4 -3 38.89 20.73 0
 -16 4 3 32.89 25.69 0
 14 -4 -3 8.73 25.09 0
 -14 4 3 12.01 27.15 0
 14 4 -3 9.85 19.62 0
 -14 -4 3 9.9 19.73 0
 -14 -4 3 12.23 19.43 0
 14 4 -3 15.09 18.98 0
 14 -4 -3 11.01 25.64 0
 -14 4 3 11.45 25.22 0
 -12 -4 3 24.16 21.78 0
 -12 4 3 2.78 31.3 0
 12 4 -3 7.64 20.76 0
 -12 4 3 14.43 33.58 0
 12 4 -3 13.99 21.19 0
 12 -4 -3 4 30.88 0
 12 -4 -3 4.04 31.91 0
 -12 -4 3 10.75 21.33 0
 10 4 -3 111.13 22.24 0
 -10 4 3 143.4 42.5 0
 10 4 -3 121.48 22.8 0
 10 -4 -3 127.71 39.09 0
 -10 -4 3 123.23 23.06 0
 -10 -4 3 129.29 22.43 0
 10 -4 -3 109.55 40.71 0
 8 4 -3 27.58 24.19 0
 8 4 -3 28.83 24.89 0
 -8 -4 3 17.85 24.1 0
 -8 -4 3 31.26 24.32 0
 6 4 -3 18.09 25.62 0
 -6 -4 3 3.97 25.28 0
 6 4 -3 7.66 24.87 0
 4 4 -3 662.37 28.79 0
 -4 -4 3 691.27 28.86 0
 4 4 -3 678.63 29.81 0
 -4 -4 3 695.74 30.04 0
 -2 -4 3 16.23 22.62 0
 -2 -4 3 9.6 30.17 0
 2 4 -3 15.04 23.23 0
 2 -4 -3 5.89 36.95 0
 2 -4 -3 20.19 38.97 0
 -2 4 3 18.05 36.42 0
 2 4 -3 10.06 31.11 0
 -2 4 3 5.92 37.36 0
 0 -4 3 262.96 24.93 0
 0 4 3 254.43 33.25 0
 0 4 -3 252.47 24.08 0
 0 -4 -3 285.95 33.95 0
 0 -4 3 249.97 26.4 0
 0 -4 -3 239.73 32.92 0
 0 4 3 264.49 32.24 0
 0 4 -3 271.38 30.79 0
 -2 -4 -3 762.6 36.34 0
 2 4 3 691.57 35.2 0
 2 -4 3 707.63 28.3 0
 -2 4 -3 678.37 31.8 0
 -2 -4 -3 633.66 30.11 0
 2 4 3 718.79 36.21 0
 2 -4 3 729.04 32.95 0
 -2 4 -3 697.47 28.6 0
 4 4 3 7.04 26.45 0
 4 -4 3 15.02 29.25 0
 -4 4 -3 7.88 28.77 0
 -4 4 -3 5.81 22.21 0
 -4 -4 -3 5.5 26.86 0
 -4 -4 -3 17.43 25.04 0
 4 4 3 9.43 25.63 0
 4 -4 3 2.34 27.74 0
 -6 4 -3 512.28 26.46 0
 -6 4 -3 565.51 27.12 0
 6 -4 3 502.59 26.03 0
 6 4 3 540.26 27.21 0
 -6 -4 -3 496.33 25.55 0
 6 4 3 511.02 26.01 0
 -6 -4 -3 579.14 27.25 0
 6 -4 3 558.3 31.84 0
 -8 -4 -3 226.1 24.03 0
 -8 4 -3 206.91 23.4 0
 8 4 3 205.63 22.48 0
 8 -4 3 206.9 27.82 0
 8 -4 3 219.16 24.76 0
 -8 -4 -3 204.29 22.6 0
 8 4 3 221.33 23.28 0
 -8 4 -3 232.53 29.55 0
 10 4 3 119.92 21.18 0
 -10 4 -3 161.75 22.82 0
 -10 -4 -3 141.85 20.94 0
 -10 -4 -3 136.13 21.93 0
 10 4 3 148.51 22.08 0
 -10 4 -3 140.95 22.1 0
 10 -4 3 152.96 26.97 0
 10 -4 3 129.3 21.18 0
 12 4 3 713.68 23.12 0
 -12 -4 -3 690.15 22.8 0
 12 4 3 795.82 23.62 0
 -12 4 -3 744.07 24.64 0
 -12 -4 -3 799.95 19.21 0
 -12 4 -3 841.06 26.89 0
 12 -4 3 708.93 24.16 0
 12 -4 3 837.6 29.92 0
 14 4 3 39.08 19.09 0
 -14 4 -3 55.44 23.34 0
 14 -4 3 58.49 23.63 0
 14 4 3 60.84 19.24 0
 -14 4 -3 56.95 23.34 0
 -14 -4 -3 59.07 18.86 0
 14 -4 3 40.24 22.67 0
 -14 -4 -3 46.03 20.43 0
 16 -4 3 87.76 17.92 0
 16 4 3 87.18 19 0
 16 -4 3 91.84 23.33 0
 -16 -4 -3 98.65 19.57 0
 -16 4 -3 110.16 23.86 0
 -16 -4 -3 94.7 18.9 0
 16 4 3 109.11 13.97 0
 -16 4 -3 104.43 18.75 0
 18 4 3 716.78 21.35 0
 -18 4 -3 762.05 26.76 0
 18 -4 3 597.99 21.15 0
 18 -4 3 699.03 25.91 0
 -18 -4 -3 711.28 16.89 0
 -18 4 -3 647.65 21.48 0
 18 4 3 628.69 20.24 0
 -18 -4 -3 616.86 16.25 0
 -20 -4 -3 30.9 17.07 0
 -20 4 -3 41.97 22.17 0
 -20 -4 -3 26.92 12.04 0
 20 4 3 39.35 17.61 0
 20 4 3 39.31 17.54 0
 20 -4 3 24.81 17.77 0
 -20 4 -3 28.69 17.83 0
 20 -4 3 39.81 17.37 0
 -22 -4 -3 173.66 18.39 0
 -22 4 -3 212.57 18.67 0
 -22 -4 -3 211.17 13.52 0
 22 -4 3 170.91 17.95 0
 -22 4 -3 192.47 21.21 0
 22 4 3 176.29 17.99 0
 22 4 3 179.9 17.48 0
 22 -4 3 181.04 17.99 0
 -24 -4 -3 78.16 16.85 0
 -24 4 -3 73.95 17.2 0
 24 4 3 95.73 17.83 0
 -24 -4 -3 87.16 17.73 0
 24 4 3 65.02 16.69 0
 -24 4 -3 75.16 17.78 0
 24 -4 3 70.55 17.03 0
 24 -4 3 66.26 21.22 0
 26 -4 3 80.22 15.88 0
 -26 -4 -3 86.99 16.62 0
 26 -4 3 89.38 16.48 0
 -26 4 -3 66.14 16.21 0
 -26 -4 -3 97.38 16.58 0
 26 4 3 84.24 16.34 0
 26 4 3 79.72 16.21 0
 -26 4 -3 92.49 17.03 0
 28 -4 3 168.4 16.92 0
 -28 -4 -3 198.9 12.58 0
 28 4 3 211.04 16.42 0
 -28 -4 -3 192.12 16.61 0
 -28 4 -3 210.76 16.95 0
 -28 4 -3 190.55 15.88 0
 28 -4 3 215.29 16.43 0
 28 4 3 170.28 12.17 0
 30 -4 3 72.55 15.64 0
 -30 4 -3 81.65 16.41 0
 30 4 3 81.4 15.19 0
 -30 4 -3 89.23 15.12 0
 30 4 3 55.05 14.83 0
 -30 -4 -3 61.92 15.32 0
 -30 -4 -3 67.07 15.41 0
 30 -4 3 72.69 15.12 0
 -32 4 -3 22.19 15.37 0
 32 -4 3 7.89 18.77 0
 -32 -4 -3 2.73 11.07 0
 32 4 3 9.22 14.54 0
 32 -4 3 9.16 15.19 0
 -32 -4 -3 10.87 14.74 0
 -32 4 -3 7.59 15.28 0
 32 4 3 -4.72 10.59 0
 -35 -5 3 201.56 11.62 0
 -35 -5 3 258.78 16.45 0
 35 5 -3 229.08 16.13 0
 -35 5 3 207.33 16.49 0
 -35 5 3 254 21.38 0
 35 5 -3 199.27 15.85 0
 35 -5 -3 223.64 20.35 0
 35 -5 -3 192.34 20.56 0
 33 -5 -3 84.9 16.84 0
 -33 -5 3 103.19 15.76 0
 -33 5 3 107.98 17.9 0
 -33 -5 3 100.39 11.2 0
 33 5 -3 91.92 15.08 0
 -33 5 3 102.83 20.73 0
 33 -5 -3 75.8 15.96 0
 33 5 -3 52.51 15.48 0
 31 -5 -3 17.13 16.68 0
 -31 5 3 22.64 14.93 0
 -31 5 3 17.92 20.67 0
 31 5 -3 30.77 15.47 0
 31 -5 -3 5.14 15.38 0
 31 5 -3 6.41 15.2 0
 -31 -5 3 19.11 15.51 0
 -31 -5 3 1.98 15.58 0
 -29 -5 3 307.14 17.27 0
 29 -5 -3 248.77 18.06 0
 29 5 -3 305.62 17.82 0
 -29 5 3 296.69 21.04 0
 29 -5 -3 276.54 18.15 0
 -29 5 3 337.47 18.82 0
 29 5 -3 255.97 12.71 0
 -29 -5 3 325.12 16.66 0
 27 -5 -3 147.69 17.88 0
 -27 -5 3 150.79 12.05 0
 -27 5 3 151.68 21.95 0
 -27 -5 3 157.72 12.56 0
 27 5 -3 161.46 16.71 0
 -27 5 3 185.83 19.38 0
 27 -5 -3 141.16 18.48 0
 27 5 -3 182.47 17.12 0
 -25 -5 3 441.18 18.98 0
 25 5 -3 445.85 18.44 0
 -25 5 3 486.31 22.79 0
 -25 -5 3 459.75 19.34 0
 25 -5 -3 410.17 20.92 0
 25 -5 -3 371.21 21.39 0
 25 5 -3 403.47 18.05 0
 -25 5 3 427.8 23.48 0
 -23 5 3 200.71 25.76 0
 -23 -5 3 200.09 17.85 0
 23 5 -3 193.41 17.52 0
 -23 -5 3 167.56 17.03 0
 23 -5 -3 192.26 23.54 0
 23 -5 -3 165.67 24.07 0
 23 5 -3 163.62 12.51 0
 -23 5 3 187.26 23.81 0
 -21 -5 3 35.99 17.53 0
 -21 -5 3 45.05 17.45 0
 -21 5 3 29.54 20.48 0
 21 -5 -3 23.93 18.81 0
 21 -5 -3 26.49 18.18 0
 21 5 -3 26.74 17.26 0
 21 5 -3 25.62 17.33 0
 -21 5 3 24.75 22.25 0
 19 5 -3 436.88 19.56 0
 -19 -5 3 444.94 19.89 0
 -19 -5 3 470.88 19.93 0
 19 5 -3 444.09 19.83 0
 19 -5 -3 432.07 25.12 0
 -19 5 3 504.55 27.62 0
 19 -5 -3 395.63 26.37 0
 -19 5 3 420.19 25.92 0
 -17 -5 3 575.92 21.56 0
 17 5 -3 552.04 21.36 0
 -17 5 3 647.74 29.92 0
 -17 -5 3 644.24 21.91 0
 17 5 -3 576.01 16.78 0
 17 -5 -3 511.32 27.71 0
 17 -5 -3 575.41 28.22 0
 -17 5 3 565.72 32.11 0
 15 5 -3 18.03 18.84 0
 -15 5 3 12.28 30.07 0
 15 -5 -3 12.74 28.07 0
 -15 -5 3 14.72 17.89 0
 -15 5 3 11.33 27.78 0
 15 -5 -3 11.85 27.94 0
 -15 -5 3 -3.07 18.85 0
 15 5 -3 19.64 17.93 0
 13 5 -3 709.82 21.66 0
 13 5 -3 776.29 22.75 0
 -13 5 3 709.77 44.13 0
 -13 5 3 882.26 43.24 0
 13 -5 -3 781.35 40.44 0
 -13 -5 3 815.95 23.65 0
 13 -5 -3 654.91 41.76 0
 -13 -5 3 751.13 22.41 0
 11 5 -3 12.34 12.99 0
 -11 -5 3 16.39 13.04 0
 11 5 -3 4.15 19.23 0
 -11 -5 3 -2.62 19.72 0
 -9 -5 3 345.31 23.22 0
 9 5 -3 343.26 21.9 0
 -9 -5 3 317.53 21.7 0
 9 5 -3 344.87 22.33 0
 -7 -5 3 262.91 22.9 0
 7 5 -3 264.39 22.08 0
 7 5 -3 268.34 21.75 0
 -5 -5 3 133.02 22.96 0
 5 5 -3 119.61 22.78 0
 -5 -5 3 121.76 21.71 0
 5 5 -3 126.57 22.08 0
 -3 5 3 61.17 39.78 0
 3 -5 -3 57.58 41.58 0
 3 5 -3 65.95 22.46 0
 -3 -5 3 53.71 20.66 0
 -3 -5 3 71.58 23.88 0
 3 5 -3 65.85 23.96 0
 -3 5 3 61.13 38.97 0
 3 -5 -3 60.63 41.1 0
 1 -5 -3 300.2 36.81 0
 -1 -5 3 334.93 24.39 0
 1 -5 -3 323.12 33.72 0
 1 5 -3 322.77 27.97 0
 -1 -5 3 340.65 29.67 0
 -1 5 3 306.45 31.47 0
 1 5 -3 314.42 25.87 0
 -1 5 3 308.26 31.72 0
 -1 5 -3 0.78 20.5 0
 -1 -5 -3 12.01 28.94 0
 1 5 3 7.76 27.86 0
 -1 5 -3 6.85 22.53 0
 1 -5 3 7.68 21.26 0
 1 -5 3 6.22 21.86 0
 -1 -5 -3 11.71 29.42 0
 1 5 3 6.95 27.95 0
 -3 5 -3 396.17 23.78 0
 3 -5 3 396.1 29.14 0
 3 -5 3 429.04 24.66 0
 3 5 3 425.83 30.69 0
 -3 5 -3 431.76 29.35 0
 3 5 3 394.94 30.57 0
 -3 -5 -3 443.03 32.29 0
 -3 -5 -3 390.99 25.8 0
 5 5 3 -2.86 21.67 0
 -5 -5 -3 4.05 22.2 0
 5 -5 3 2.48 24.5 0
 -5 5 -3 4.37 25.53 0
 5 5 3 8.44 22.03 0
 -5 -5 -3 9.72 20.4 0
 -5 5 -3 0.71 20.2 0
 5 -5 3 12.81 20.81 0
 -7 5 -3 5.21 23.9 0
 -7 -5 -3 18 20.3 0
 7 5 3 18.99 24.17 0
 7 -5 3 7.29 18.9 0
 -7 5 -3 7.43 20.16 0
 7 -5 3 4.35 20.11 0
 -7 -5 -3 8.22 19.07 0
 7 5 3 0.35 20.01 0
 9 5 3 16.27 19.83 0
 9 5 3 2.96 18.49 0
 -9 -5 -3 4.43 19.5 0
 -9 5 -3 6.4 20.31 0
 9 -5 3 -3.44 24.81 0
 -9 -5 -3 6.69 18.73 0
 9 -5 3 12.74 18.64 0
 -9 5 -3 2.19 19.32 0
 -11 5 -3 71.28 24.25 0
 11 -5 3 59.29 23.07 0
 -11 5 -3 68.18 19.42 0
 11 5 3 65.24 18.39 0
 11 -5 3 63.15 20.43 0
 11 5 3 72.11 19.61 0
 -11 -5 -3 51.72 17.67 0
 -11 -5 -3 57.17 19.5 0
 13 -5 3 55.44 18.98 0
 13 5 3 72.46 18.47 0
 -13 -5 -3 72.01 20.03 0
 -13 5 -3 49.73 19.02 0
 13 -5 3 48.39 19.98 0
 -13 5 -3 61.13 20.05 0
 13 5 3 57.78 19.32 0
 -13 -5 -3 58.69 17.82 0
 15 5 3 98.41 17.66 0
 -15 5 -3 116.26 19.59 0
 15 -5 3 85.44 18.83 0
 15 -5 3 104.08 18.96 0
 -15 -5 -3 107.03 18.19 0
 -15 5 -3 102.4 18.99 0
 -15 -5 -3 124.76 18.56 0
 15 5 3 112.04 18.76 0
 -17 -5 -3 59.11 12.79 0
 -17 5 -3 90.39 19.19 0
 17 -5 3 69.34 18.22 0
 -17 5 -3 74.02 22.98 0
 17 5 3 78.11 17.59 0
 17 -5 3 87.97 18.55 0
 17 5 3 82.23 18.13 0
 -17 -5 -3 80.12 18.38 0
 -19 -5 -3 51.85 18 0
 -19 5 -3 22.04 20.6 0
 19 5 3 36.39 11.23 0
 19 -5 3 32.23 20.24 0
 -19 -5 -3 21.93 17.36 0
 19 -5 3 31.69 20.16 0
 19 5 3 29.17 12.87 0
 -19 5 -3 48.55 21.57 0
 21 -5 3 -11.36 16.02 0
 21 5 3 8.7 17.27 0
 -21 -5 -3 -6.74 16.74 0
 -21 -5 -3 18.91 16.61 0
 -21 5 -3 -5.34 15.9 0
 21 -5 3 0.11 16.61 0
 21 5 3 12.89 16.19 0
 -21 5 -3 3.2 16.8 0
 23 5 3 18.73 12 0
 23 5 3 3.69 11.85 0
 -23 -5 -3 23.8 17.03 0
 23 -5 3 27.01 16.89 0
 -23 -5 -3 -2.04 17.13 0
 23 -5 3 1.48 16.1 0
 -23 5 -3 36.17 20.19 0
 -23 5 -3 12.99 16.05 0
 -25 -5 -3 8.4 11.07 0
 -25 5 -3 8.4 17.96 0
 25 -5 3 10.89 17.26 0
 -25 5 -3 12.2 15.53 0
 -25 -5 -3 -3.34 11.22 0
 25 5 3 14.28 15.68 0
 25 -5 3 8.68 15.51 0
 25 5 3 -10.99 15.64 0
 -27 -5 -3 11.7 15.2 0
 -27 5 -3 -1.68 15.19 0
 27 -5 3 8.17 15.68 0
 27 -5 3 1.02 15.53 0
 27 5 3 4.05 15.24 0
 -27 5 -3 11.31 16.06 0
 27 5 3 15.75 14.84 0
 -27 -5 -3 29.13 15.74 0
 29 -5 3 110.6 15.56 0
 29 5 3 100.05 15.26 0
 -29 5 -3 108.26 16.55 0
 -29 5 -3 117.42 15.25 0
 -29 -5 -3 89.41 15.76 0
 29 5 3 116.69 15.56 0
 -29 -5 -3 125.44 15.84 0
 29 -5 3 103.85 19.72 0
 31 -5 3 23.6 15.35 0
 -31 5 -3 26.26 15.83 0
 31 5 3 11.1 15.11 0
 31 -5 3 23.27 15.1 0
 -31 5 -3 31.86 14.64 0
 31 5 3 26.98 15.17 0
 -31 -5 -3 21.45 15.55 0
 -31 -5 -3 15.13 15.48 0
 -34 -6 3 21.07 14.69 0
 -34 6 3 3.78 14.93 0
 -34 -6 3 20.49 14.31 0
 34 6 -3 -15.31 10.28 0
 34 -6 -3 0.46 19.47 0
 -34 6 3 -0.04 16.45 0
 34 -6 -3 3.51 16.16 0
 34 6 -3 1.89 9.97 0
 32 6 -3 17.38 10.19 0
 -32 -6 3 25.22 15 0
 32 -6 -3 19.69 15.26 0
 32 6 -3 25.67 14.7 0
 -32 6 3 9.77 16.93 0
 -32 -6 3 20.52 14.66 0
 32 -6 -3 13.94 16.54 0
 -32 6 3 16.43 18.46 0
 -30 -6 3 4.49 15.26 0
 -30 6 3 9.95 19.95 0
 30 6 -3 -6.97 14.91 0
 30 -6 -3 14.31 20.62 0
 -30 6 3 12.86 21.44 0
 30 -6 -3 5.56 20.76 0
 30 6 -3 9.75 11.11 0
 -30 -6 3 -3.88 11.13 0
 -28 -6 3 54.01 15.46 0
 -28 6 3 63.12 17.51 0
 28 -6 -3 49.22 17.04 0
 28 -6 -3 62.81 20.37 0
 -28 6 3 55.46 20.31 0
 28 6 -3 68.72 15.4 0
 -28 -6 3 72.25 15.72 0
 28 6 -3 49.74 11.29 0
 -26 -6 3 -1.28 15.47 0
 26 6 -3 -3.67 15.3 0
 26 6 -3 6.77 15.73 0
 26 -6 -3 6.4 20.16 0
 -26 6 3 2.04 16.15 0
 -26 6 3 -4.07 21.42 0
 -26 -6 3 -5.62 15.56 0
 26 -6 -3 5.19 19.22 0
 24 -6 -3 53.96 22.54 0
 24 6 -3 65.4 15.68 0
 24 -6 -3 76.9 20.88 0
 -24 6 3 61.48 21.97 0
 -24 -6 3 83.01 16.56 0
 -24 6 3 76.84 22.23 0
 -24 -6 3 85.94 16.83 0
 24 6 -3 65.14 15.21 0
 -22 6 3 24.55 22.49 0
 22 6 -3 12.39 16.18 0
 -22 6 3 26.97 23.7 0
 -22 -6 3 26.68 16 0
 22 6 -3 26.01 15.41 0
 -22 -6 3 23.64 15.67 0
 22 -6 -3 32.96 22.59 0
 22 -6 -3 16.71 26.1 0
 20 -6 -3 6.44 25.91 0
 20 -6 -3 8.48 26.56 0
 -20 6 3 -1.46 27.01 0
 20 6 -3 -0.51 16.84 0
 -20 -6 3 -4.33 12.13 0
 20 6 -3 9.32 16.61 0
 -20 -6 3 -2.56 16.5 0
 -20 6 3 3.03 22.02 0
 -18 -6 3 -5.33 18.28 0
 18 -6 -3 7.58 26.44 0
 18 -6 -3 2.5 26.49 0
 -18 -6 3 11.07 17.76 0
 18 6 -3 10.4 17.6 0
 -18 6 3 12.2 28.13 0
 -18 6 3 8.9 26.83 0
 18 6 -3 18.26 17.52 0
 -16 -6 3 37.39 18.32 0
 -16 6 3 20.01 29.35 0
 -16 -6 3 19.83 17.52 0
 16 -6 -3 15.73 30.99 0
 16 -6 -3 14.37 28.17 0
 16 6 -3 28.14 16.98 0
 16 6 -3 33.96 17.73 0
 -16 6 3 15.83 31.02 0
 14 6 -3 45.4 17.08 0
 -14 -6 3 62.11 18.37 0
 14 6 -3 69.69 18.58 0
 -14 -6 3 48.11 12.43 0
 12 6 -3 13.09 15.95 0
 12 6 -3 13.42 16.42 0
 -12 -6 3 16.76 17.75 0
 -12 -6 3 12.5 19.63 0
 10 6 -3 248.67 18.38 0
 10 6 -3 224 18.27 0
 -10 -6 3 233.73 18.22 0
 -10 -6 3 246.51 18.47 0
 8 6 -3 27.05 19.18 0
 8 6 -3 19.31 18.32 0
 -8 -6 3 15.45 18.76 0
 -6 -6 3 71.68 19.09 0
 6 6 -3 79.1 20.04 0
 6 6 -3 79.8 23.33 0
 -6 -6 3 74.81 19.75 0
 -4 -6 3 207.23 20.08 0
 4 6 -3 215.76 23.84 0
 4 6 -3 215.89 26.1 0
 -4 -6 3 228.87 21.22 0
 2 6 -3 41.88 22.16 0
 -2 -6 3 35.5 22.63 0
 -2 -6 3 27.43 19.87 0
 2 -6 -3 41.89 32.84 0
 2 6 -3 39.62 20.34 0
 2 -6 -3 37.43 30.69 0
 -2 6 3 41.02 27.48 0
 -2 6 3 40.34 30.38 0
 0 6 -3 361.62 26.85 0
 0 6 3 373.5 30.91 0
 0 6 -3 361.37 20.54 0
 0 -6 -3 375.23 31.38 0
 0 -6 3 356.98 21.12 0
 0 -6 3 366.71 26.93 0
 0 6 3 352.36 27.89 0
 0 -6 -3 377.38 32.82 0
 -2 -6 -3 276.27 23.45 0
 -2 6 -3 299.12 27.21 0
 2 -6 3 298.95 22.08 0
 -2 -6 -3 305.93 28.3 0
 2 -6 3 292.57 26.39 0
 2 6 3 312.09 26.93 0
 -2 6 -3 283.35 24.66 0
 2 6 3 305.08 23.19 0
 -4 -6 -3 31.74 20.28 0
 4 6 3 26.83 24.88 0
 4 -6 3 24.79 23.37 0
 4 -6 3 31.41 23.37 0
 -4 -6 -3 23.23 25.53 0
 -4 6 -3 23.84 23.03 0
 4 6 3 30.88 24.32 0
 -4 6 -3 29.94 19.1 0
 -6 -6 -3 422.58 22.88 0
 6 -6 3 447 27.28 0
 -6 -6 -3 498.36 23.41 0
 6 6 3 459.92 27.23 0
 -6 6 -3 470.11 27.7 0
 6 -6 3 498.59 27.34 0
 -6 6 -3 465.18 27.82 0
 6 6 3 479.21 22.62 0
 8 -6 3 529.62 28.32 0
 8 -6 3 466.78 26.03 0
 -8 -6 -3 487.06 21.84 0
 8 6 3 525.57 21.91 0
 -8 6 -3 520.35 27.21 0
 8 6 3 484.98 22.04 0
 -8 6 -3 484.16 27.09 0
 -8 -6 -3 536.98 22.42 0
 10 -6 3 62.71 23.59 0
 -10 -6 -3 65.29 18.55 0
 -10 -6 -3 76.33 17.97 0
 -10 6 -3 50.63 22.6 0
 -10 6 -3 51.34 19.49 0
 10 -6 3 49.65 18.03 0
 10 6 3 64.76 17.83 0
 10 6 3 62.95 18.47 0
 12 -6 3 419.18 24.73 0
 -12 6 -3 514.27 26.28 0
 -12 -6 -3 507.6 20.54 0
 12 -6 3 502.65 26.4 0
 -12 -6 -3 430.3 20.13 0
 12 6 3 469.7 20.06 0
 -12 6 -3 445.77 25.73 0
 12 6 3 510.79 20.1 0
 14 -6 3 82.86 22.27 0
 -14 -6 -3 107.9 18.66 0
 14 6 3 79.63 19.03 0
 -14 -6 -3 96.25 18.69 0
 -14 6 -3 81.21 23.71 0
 -14 6 -3 91.22 23.33 0
 14 6 3 103.23 18.22 0
 14 -6 3 90.99 19.28 0
 16 -6 3 152.27 22.93 0
 -16 6 -3 129.57 22.68 0
 -16 -6 -3 149.96 19.41 0
 -16 -6 -3 148.67 19.74 0
 16 -6 3 117.15 20.15 0
 16 6 3 144.7 19.3 0
 16 6 3 128.39 18.78 0
 -16 6 -3 153.49 19.7 0
 18 -6 3 253.41 22.09 0
 18 6 3 267.47 18.1 0
 -18 6 -3 297.09 22.75 0
 -18 -6 -3 328.82 19.11 0
 18 6 3 281.9 13.55 0
 18 -6 3 268.3 24.56 0
 -18 -6 -3 263.63 17.44 0
 -18 6 -3 265.21 18.64 0
 -20 -6 -3 201.63 16.64 0
 20 6 3 212.07 16.83 0
 -20 -6 -3 221.12 17.42 0
 -20 6 -3 219.85 22.79 0
 20 -6 3 189.71 21.71 0
 20 -6 3 197.78 18.81 0
 20 6 3 193.71 17.37 0
 -20 6 -3 199.29 18.18 0
 22 -6 3 114.36 21.17 0
 -22 6 -3 116.87 18.46 0
 22 -6 3 134.63 21.15 0
 -22 -6 -3 134.81 17.26 0
 -22 6 -3 126.57 17.16 0
 22 6 3 112.49 11.49 0
 22 6 3 125.41 15.34 0
 -22 -6 -3 96.97 15.96 0
 24 6 3 153.12 11.99 0
 -24 6 -3 189.6 21.83 0
 -24 -6 -3 143.62 15.75 0
 24 6 3 150.77 15.77 0
 24 -6 3 160.61 20.08 0
 -24 6 -3 163.6 16.46 0
 24 -6 3 168.98 16.7 0
 -24 -6 -3 171.36 15.83 0
 -26 -6 -3 23 15.56 0
 -26 6 -3 8.94 15.6 0
 -26 6 -3 2.42 15.67 0
 -26 -6 -3 9.18 15.09 0
 26 -6 3 12.77 16.01 0
 26 6 3 2.3 15.44 0
 26 6 3 1.94 14.91 0
 26 -6 3 6.43 19.17 0
 -28 -6 -3 237.78 16.42 0
 28 -6 3 235.44 17.56 0
 -28 6 -3 208.77 21.56 0
 -28 6 -3 253.11 19.55 0
 28 -6 3 191.78 18.06 0
 -28 -6 -3 257.14 16.09 0
 28 6 3 221.37 15.9 0
 28 6 3 221.21 15.81 0
 30 -6 3 82.79 19.27 0
 -30 -6 -3 79.35 15.41 0
 30 6 3 57.97 14.8 0
 -30 6 -3 75.34 15.19 0
 30 6 3 80.78 11.02 0
 -30 -6 -3 82.06 15.52 0
 30 -6 3 58.98 16.06 0
 -30 6 -3 70.87 16.3 0
 31 7 -3 16.53 15.04 0
 31 -7 -3 -0.58 19.34 0
 -31 -7 3 1.46 15.2 0
 -31 7 3 10.89 19.92 0
 31 7 -3 15.1 14.19 0
 -31 -7 3 10.93 14.83 0
 31 -7 -3 7.55 19.76 0
 -31 7 3 4.87 17.88 0
 29 7 -3 30.84 15.58 0
 -29 7 3 27.32 20.08 0
 -29 -7 3 28.79 15.33 0
 29 7 -3 25.02 15.08 0
 29 -7 -3 36.05 19.63 0
 29 -7 -3 25.4 19.79 0
 -29 -7 3 29.77 15.51 0
 -29 7 3 25.24 18.09 0
 -27 7 3 22.78 22.02 0
 27 -7 -3 11.09 20.35 0
 -27 7 3 23.4 20.83 0
 -27 -7 3 29.89 15.32 0
 27 7 -3 17 14.79 0
 -27 -7 3 15.58 14.94 0
 27 -7 -3 26.81 19.88 0
 27 7 -3 38.1 15.91 0
 25 7 -3 29.15 15.82 0
 -25 -7 3 29.98 15.62 0
 25 -7 -3 20.02 24.33 0
 25 7 -3 36.36 15.91 0
 -25 -7 3 26.88 10.22 0
 25 -7 -3 25.89 21.23 0
 -25 7 3 18.77 22.63 0
 -25 7 3 32.38 22.28 0
 23 7 -3 72.17 16.24 0
 23 -7 -3 72.87 23.97 0
 -23 7 3 74.92 25.15 0
 -23 -7 3 81.13 16.72 0
 23 -7 -3 53.16 24.4 0
 -23 7 3 64.5 23.11 0
 23 7 -3 68.4 12.12 0
 -23 -7 3 68.88 16.01 0
 -21 7 3 -9.24 25.48 0
 -21 7 3 1.61 27.1 0
 -21 -7 3 19.21 16.17 0
 21 -7 -3 -8.24 26 0
 21 7 -3 2.39 16.79 0
 21 -7 -3 -4.95 27.07 0
 -21 -7 3 15.09 16.4 0
 21 7 -3 6.24 16.62 0
 19 -7 -3 39.86 32 0
 -19 7 3 46.18 32.82 0
 19 7 -3 46.15 16.73 0
 -19 -7 3 46.5 16.53 0
 19 7 -3 36.85 17.5 0
 -19 -7 3 39.95 16.84 0
 19 -7 -3 48.68 35.1 0
 17 7 -3 8.56 17.44 0
 17 7 -3 9.15 17.48 0
 -17 -7 3 25.1 17.54 0
 -17 -7 3 10.11 12.31 0
 -15 -7 3 57.56 17.77 0
 15 7 -3 45.24 18.19 0
 15 7 -3 47.91 19.08 0
 -15 -7 3 53.82 17.9 0
 -13 -7 3 -4.94 16.97 0
 -13 -7 3 -4.59 17.43 0
 13 7 -3 4.31 17.36 0
 13 7 -3 5.14 17.64 0
 -11 -7 3 23.04 17.39 0
 11 7 -3 15.42 16.52 0
 -11 -7 3 19.87 20.71 0
 11 7 -3 0.53 17.07 0
 9 7 -3 34.34 16.79 0
 -9 -7 3 26.68 17.54 0
 9 7 -3 9.89 17.04 0
 -9 -7 3 32.5 17.62 0
 7 7 -3 175.83 19.11 0
 7 7 -3 178.16 21.6 0
 -7 -7 3 171.34 18.41 0
 -7 -7 3 186.71 19.19 0
 -5 -7 3 14.45 22.03 0
 5 7 -3 10.41 17.35 0
 5 7 -3 9.36 22.91 0
 -5 -7 3 8.28 17.73 0
 -3 -7 3 28.03 18.94 0
 -3 7 3 23.41 32.76 0
 3 -7 -3 33.2 35.16 0
 3 -7 -3 27.59 37 0
 -3 7 3 35.56 35.99 0
 -3 -7 3 21.32 17.44 0
 3 7 -3 35.57 19.27 0
 3 7 -3 29.09 17.88 0
 -1 7 3 45.7 27.09 0
 1 7 -3 35.36 21.57 0
 -1 -7 3 36.51 23.31 0
 1 -7 -3 31.75 28.8 0
 -1 7 3 32.09 22.92 0
 1 7 -3 45.01 23.07 0
 -1 -7 3 30.51 21.76 0
 -1 -7 -3 23.17 23.54 0
 -1 -7 -3 33.96 23.64 0
 1 -7 3 35.58 23.26 0
 -1 7 -3 30.35 23.49 0
 1 7 3 30.12 23.37 0
 -1 7 -3 38.54 21.15 0
 1 -7 3 31.38 22.1 0
 1 7 3 33.96 23.12 0
 3 -7 3 -5.52 21.36 0
 -3 -7 -3 11.19 24.02 0
 -3 7 -3 0.01 23.74 0
 3 7 3 1.36 23.32 0
 3 -7 3 6.25 23.47 0
 -3 7 -3 -2.67 21.44 0
 -3 -7 -3 10.98 23.06 0
 3 7 3 9.08 18.81 0
 -5 -7 -3 7.59 22.94 0
 5 -7 3 15.22 21.44 0
 5 -7 3 12.26 22.95 0
 -5 -7 -3 6.03 23.49 0
 -5 7 -3 13.97 22.15 0
 -5 7 -3 15.13 21.79 0
 5 7 3 10.63 22.85 0
 5 7 3 21.15 18.52 0
 7 7 3 396.79 20.69 0
 -7 -7 -3 405.5 21.19 0
 -7 7 -3 371.66 24.95 0
 -7 7 -3 410.13 24.98 0
 7 -7 3 375.2 24.67 0
 7 -7 3 416.27 25.08 0
 -7 -7 -3 375.26 21.07 0
 7 7 3 372.29 20.88 0
 -9 7 -3 -4.25 25.13 0
 9 -7 3 1.84 21.99 0
 9 7 3 12.88 18.55 0
 9 -7 3 1.66 24.61 0
 -9 -7 -3 6.78 18.54 0
 -9 7 -3 10.09 21.32 0
 9 7 3 -5.51 17.74 0
 -9 -7 -3 3.54 18.71 0
 11 -7 3 31.86 22.58 0
 11 7 3 34.4 17.72 0
 -11 7 -3 45.21 23.69 0
 11 7 3 45.77 17.28 0
 11 -7 3 35.02 22.51 0
 -11 -7 -3 34.58 17.97 0
 -11 7 -3 32.11 22.62 0
 -11 -7 -3 28.04 17.26 0
 -13 7 -3 13.4 22.66 0
 -13 -7 -3 31.23 18.41 0
 13 -7 3 19.21 22.88 0
 13 -7 3 13.79 21.8 0
 -13 -7 -3 14.45 17.51 0
 -13 7 -3 24.11 22.34 0
 13 7 3 17.84 17.38 0
 13 7 3 19.96 17.58 0
 15 7 3 80.6 17.82 0
 15 -7 3 82.52 23.81 0
 -15 7 -3 71.14 23.07 0
 -15 7 -3 66.96 23.4 0
 -15 -7 -3 72.27 17.28 0
 15 7 3 67.76 18.04 0
 -15 -7 -3 78.49 18.93 0
 15 -7 3 61.58 22.2 0
 17 -7 3 57.11 22.02 0
 -17 -7 -3 65.85 17.2 0
 -17 -7 -3 77.41 18.18 0
 -17 7 -3 61.44 18.53 0
 -17 7 -3 74.45 23.14 0
 17 7 3 45.87 17.45 0
 17 7 3 67.16 17.06 0
 17 -7 3 69.13 22.73 0
 19 -7 3 59.93 21.79 0
 19 -7 3 63.1 21.3 0
 -19 -7 -3 101.42 17.78 0
 -19 7 -3 65.89 22.11 0
 -19 7 -3 68.05 22.06 0
 -19 -7 -3 76.48 16.73 0
 19 7 3 84.29 11.98 0
 19 7 3 86.33 16.86 0
 -21 -7 -3 -6.74 16 0
 21 -7 3 -5.92 15.43 0
 21 -7 3 -8.78 19.75 0
 -21 7 -3 -4.3 15.18 0
 21 7 3 17.76 17.12 0
 21 7 3 5.16 15.49 0
 -21 7 -3 -2.93 16.82 0
 -21 -7 -3 7.58 17.21 0
 -23 7 -3 138.08 21.02 0
 -23 -7 -3 128.57 15.06 0
 -23 -7 -3 133.05 17.27 0
 23 -7 3 98.25 20.51 0
 -23 7 -3 118.09 16.09 0
 23 7 3 119.01 16.16 0
 23 -7 3 133.79 20.85 0
 23 7 3 113.3 15.49 0
 -25 7 -3 8.15 21.06 0
 25 -7 3 32.63 15.89 0
 -25 7 -3 25.44 19.5 0
 25 -7 3 29.69 16.78 0
 -25 -7 -3 26.59 15.92 0
 25 7 3 22.85 15.65 0
 25 7 3 18.52 15.13 0
 -25 -7 -3 32.23 15.66 0
 -27 -7 -3 30.75 15.12 0
 27 -7 3 26.43 16.14 0
 -27 -7 -3 29.42 15.32 0
 -27 7 -3 22.35 16.31 0
 27 7 3 2.67 10.39 0
 27 7 3 30.6 14.81 0
 -27 7 -3 31.21 15.2 0
 27 -7 3 17.2 16.13 0
 -29 7 -3 60.85 16.57 0
 29 7 3 37.48 15.17 0
 29 -7 3 54.98 19.61 0
 -29 -7 -3 90.26 15.43 0
 -29 -7 -3 63.99 15.51 0
 -29 7 -3 52.89 15.8 0
 29 7 3 54.58 15.04 0
 29 -7 3 51.83 16.16 0
 -30 8 3 42.44 23.55 0
 30 8 -3 49.65 15.26 0
 -30 -8 3 45.19 13.77 0
 30 -8 -3 41.68 22.79 0
 -30 -8 3 56.6 15.95 0
 -30 8 3 25.75 18.97 0
 30 -8 -3 32.1 23.11 0
 30 8 -3 51.79 15.73 0
 -28 -8 3 2.03 15.14 0
 -28 8 3 1.94 26.28 0
 -28 -8 3 20.39 15.33 0
 28 -8 -3 -5.23 22.91 0
 28 8 -3 10.1 14.33 0
 28 -8 -3 -4.08 19.34 0
 -28 8 3 -0.55 21.91 0
 28 8 -3 2.96 14.2 0
 -26 -8 3 29.47 16.03 0
 -26 -8 3 23.54 10.76 0
 26 -8 -3 31.98 28.17 0
 -26 8 3 37.24 26.24 0
 26 -8 -3 24.68 25.55 0
 26 8 -3 29.8 11.47 0
 26 8 -3 31.06 14.65 0
 -24 8 3 8.44 29.48 0
 -24 8 3 8.34 29.35 0
 24 -8 -3 12.21 32.01 0
 24 8 -3 -0.29 15.7 0
 24 -8 -3 8.72 31.25 0
 -24 -8 3 17.47 15.76 0
 -24 -8 3 15.21 15.08 0
 24 8 -3 7.7 14.51 0
 -22 -8 3 24.69 17.06 0
 -22 -8 3 51.26 16.29 0
 22 8 -3 43.81 15.05 0
 22 8 -3 16.59 16.58 0
 -20 -8 3 2.52 16.44 0
 -20 -8 3 6.68 16.91 0
 20 8 -3 14.21 16.86 0
 20 8 -3 -3.75 17.18 0
 -18 -8 3 -21.2 16.72 0
 18 8 -3 14.46 16.2 0
 18 8 -3 -7.56 16.39 0
 -18 -8 3 15.15 16.67 0
 -16 -8 3 2.52 17.78 0
 -16 -8 3 3.33 16.86 0
 16 8 -3 7.71 17.35 0
 16 8 -3 1.47 17.29 0
 14 8 -3 82.43 18.09 0
 -14 -8 3 77.84 21.36 0
 -14 -8 3 69.03 17.06 0
 14 8 -3 81.73 17.41 0
 -12 -8 3 9.02 17.34 0
 12 8 -3 15.31 17.23 0
 12 8 -3 7.29 16.62 0
 10 8 -3 46.05 17.33 0
 -10 -8 3 33.89 16.45 0
 -10 -8 3 48.75 17.51 0
 10 8 -3 36.88 17 0
 8 8 -3 1.95 16.66 0
 -8 -8 3 12.23 17.64 0
 -8 -8 3 1.21 16.71 0
 8 8 -3 5.1 17.47 0
 -6 -8 3 51.43 21.01 0
 6 8 -3 47.72 18.52 0
 6 8 -3 57.84 17.38 0
 -6 -8 3 58.48 18.37 0
 -4 -8 3 18 22.53 0
 -4 -8 3 20.04 20.35 0
 4 8 -3 12.04 19.96 0
 4 8 -3 17.26 21.69 0
 -2 8 3 81.53 30.34 0
 2 -8 -3 87.6 30.47 0
 2 -8 -3 89.57 32.71 0
 2 8 -3 85.62 17.55 0
 2 8 -3 90.16 23.62 0
 -2 8 3 87.54 31.78 0
 -2 -8 3 84.61 23.05 0
 -2 -8 3 90.43 22.38 0
 0 8 3 44.67 24.76 0
 0 -8 -3 35.35 21.96 0
 0 -8 3 56.2 22.86 0
 0 8 3 45.05 25.68 0
 0 8 -3 43.91 20.26 0
 0 -8 -3 50.33 23.43 0
 0 8 -3 45.03 23.22 0
 0 -8 3 45.36 21.51 0
 -2 8 -3 16.6 20.2 0
 -2 8 -3 20.53 21.96 0
 2 -8 3 7.24 22.67 0
 2 8 3 5.86 18.09 0
 -2 -8 -3 11.78 22.36 0
 2 8 3 5.01 21.73 0
 2 -8 3 14.27 21.43 0
 -2 -8 -3 10.93 22.33 0
 -4 -8 -3 -3.13 21.3 0
 4 8 3 11.08 22.19 0
 -4 8 -3 5 23.43 0
 4 8 3 4.7 22.28 0
 -4 -8 -3 5.68 18.49 0
 4 -8 3 11.17 22.63 0
 4 -8 3 2.46 22.22 0
 -4 8 -3 5.95 24.62 0
 -6 -8 -3 35.15 17.52 0
 6 8 3 35.1 21.17 0
 -6 8 -3 41.04 22.81 0
 -6 8 -3 30.08 22.19 0
 6 -8 3 35.36 25.99 0
 -6 -8 -3 35.89 23.02 0
 6 8 3 36.88 23.76 0
 6 -8 3 33.28 27.54 0
 8 -8 3 137.26 27.86 0
 -8 -8 -3 139.46 18.37 0
 -8 -8 -3 135.32 21.38 0
 8 -8 3 123.9 27.43 0
 8 8 3 144.81 17.99 0
 -8 8 -3 129.89 23.72 0
 8 8 3 141.29 18.1 0
 -8 8 -3 121.91 22.86 0
 10 8 3 19.25 19.99 0
 -10 -8 -3 21.08 18.12 0
 10 -8 3 16.03 23.01 0
 -10 -8 -3 11.48 16.52 0
 10 -8 3 21.64 26.11 0
 -10 8 -3 15.06 26.23 0
 10 8 3 21.81 16.59 0
 -10 8 -3 19.16 26.12 0
 12 8 3 5.75 16.58 0
 12 -8 3 5.23 25.39 0
 -12 8 -3 5.61 21.72 0
 -12 8 -3 10.65 21.44 0
 12 -8 3 7.61 25.03 0
 -12 -8 -3 -1.09 17.01 0
 -12 -8 -3 6.63 17.6 0
 12 8 3 21.52 20.87 0
 14 -8 3 61.14 21.96 0
 14 -8 3 63.31 25.13 0
 -14 8 -3 63.3 21.91 0
 -14 -8 -3 74.08 17.4 0
 14 8 3 57.14 16.84 0
 -14 -8 -3 53.84 16.83 0
 -14 8 -3 59.78 25.89 0
 14 8 3 59.87 17.59 0
 16 8 3 25.13 16.42 0
 -16 -8 -3 15.29 16.87 0
 -16 -8 -3 30.45 16.06 0
 -16 8 -3 20.84 24.97 0
 16 -8 3 19.09 19.77 0
 16 -8 3 27.84 24.95 0
 -16 8 -3 15.67 19.33 0
 16 8 3 34.44 16.16 0
 -18 8 -3 156.02 21.81 0
 18 8 3 144.7 15.78 0
 18 -8 3 123.32 21.08 0
 -18 -8 -3 137.4 17.72 0
 -18 -8 -3 150.5 18.63 0
 -18 8 -3 132.62 20.92 0
 18 -8 3 127.3 21.95 0
 18 8 3 123.11 15.77 0
 20 8 3 -5.11 16.62 0
 -20 -8 -3 5.19 16.01 0
 -20 -8 -3 5.66 17.2 0
 20 8 3 16.78 15.7 0
 -20 8 -3 0.17 19.94 0
 -20 8 -3 1.1 20.78 0
 20 -8 3 3.82 20.21 0
 20 -8 3 10.56 21.14 0
 22 -8 3 19.59 20.1 0
 -22 8 -3 14.54 19.33 0
 22 -8 3 14.57 19.61 0
 -22 -8 -3 24.33 15.58 0
 -22 -8 -3 12.8 15.57 0
 -22 8 -3 15.42 20.89 0
 22 8 3 30.54 15.45 0
 22 8 3 35.12 15.63 0
 24 -8 3 50.25 23.77 0
 24 -8 3 53.09 20.86 0
 -24 -8 -3 66.15 16.26 0
 24 8 3 58.11 15.44 0
 -24 8 -3 62.93 20.33 0
 -24 -8 -3 60.4 15.43 0
 24 8 3 61.79 15.56 0
 -24 8 -3 48.64 18.66 0
 -26 -8 -3 29.06 15.42 0
 26 8 3 16.07 14.75 0
 -26 -8 -3 16.54 14.92 0
 -26 8 -3 16.57 20 0
 26 -8 3 16.51 19.53 0
 -26 8 -3 11.5 15.28 0
 26 -8 3 19.74 19.53 0
 26 8 3 -3.72 15.16 0
 -27 -9 3 0.58 14.55 0
 -27 -9 3 -3.88 10.34 0
 27 9 -3 10.47 14.82 0
 27 9 -3 5.53 10.62 0
 -25 -9 3 70.45 15.62 0
 25 9 -3 82.69 16.21 0
 25 9 -3 71.68 15.22 0
 -25 -9 3 86.23 16.25 0
 -23 -9 3 -6.58 15.3 0
 23 9 -3 -1.31 14.95 0
 -23 -9 3 18.87 15.63 0
 23 9 -3 11.28 15.26 0
 21 9 -3 33.68 15.63 0
 21 9 -3 12.46 15.9 0
 -21 -9 3 24.72 11.28 0
 -21 -9 3 19.77 15.58 0
 -19 -9 3 -7.26 16.79 0
 19 9 -3 4.88 11.62 0
 19 9 -3 8.7 15.68 0
 -19 -9 3 4.38 15.73 0
 17 9 -3 20.76 15.18 0
 -17 -9 3 24.1 15.7 0
 -17 -9 3 33.79 14.6 0
 17 9 -3 17.74 15.57 0
 15 9 -3 75.07 16.03 0
 15 9 -3 74.08 16.36 0
 -15 -9 3 85.78 16.56 0
 -13 -9 3 55.17 19.51 0
 13 9 -3 49.86 16 0
 13 9 -3 45.91 16.27 0
 -13 -9 3 56.68 16.69 0
 11 9 -3 36.84 16.72 0
 -11 -9 3 33.2 19.28 0
 -11 -9 3 23.56 17.84 0
 11 9 -3 33.69 16.5 0
 -9 -9 3 11.53 17.2 0
 9 9 -3 13.34 16.52 0
 -9 -9 3 17.7 16 0
 9 9 -3 0.69 18.99 0
 -7 -9 3 21.39 20.75 0
 7 9 -3 22.51 15.38 0
 -7 -9 3 17.91 17.58 0
 7 9 -3 40.51 22.36 0
 -5 -9 3 90.26 20.49 0
 5 9 -3 92.89 19.25 0
 5 9 -3 89.67 19.95 0
 -5 -9 3 88.08 20.13 0
 3 9 -3 35.5 21.44 0
 -3 -9 3 29.47 23.25 0
 -3 -9 3 30.64 21.12 0
 3 9 -3 26.72 19.18 0
 -1 9 3 10.19 27.05 0
 1 9 -3 2.93 18.62 0
 1 -9 -3 4.12 28.54 0
 -1 9 3 12.14 27.89 0
 -1 -9 3 20.31 23.03 0
 1 -9 -3 9.6 27.74 0
 -1 -9 3 6.03 20.92 0
 1 9 -3 8.97 16.73 0
 -1 -9 -3 13.77 23.66 0
 1 -9 3 13.72 21.5 0
 -1 -9 -3 9.23 26.51 0
 1 -9 3 5.03 23.65 0
 1 9 3 15.64 24.75 0
 -1 9 -3 16.61 25.55 0
 -1 9 -3 8.87 20.46 0
 1 9 3 9.07 21.54 0
 3 -9 3 20.78 24.12 0
 3 9 3 29.36 21.77 0
 -3 9 -3 19.14 22.53 0
 -3 -9 -3 18.08 18.88 0
 3 -9 3 28.05 26.54 0
 -3 9 -3 20.76 24.01 0
 3 9 3 26.22 22.34 0
 5 9 3 1.64 22.65 0
 5 -9 3 1.97 21.28 0
 5 -9 3 -8.35 25.39 0
 -5 -9 -3 12.35 18.51 0
 -5 -9 -3 9.4 22.56 0
 -5 9 -3 2.84 25.61 0
 5 9 3 5.81 22.18 0
 -5 9 -3 11.96 23.84 0
 7 -9 3 17.54 24.32 0
 -7 9 -3 13.02 23.5 0
 -7 -9 -3 17.96 22.8 0
 7 9 3 7.19 22.18 0
 -7 9 -3 16.75 24.31 0
 7 9 3 18.81 20.94 0
 -7 -9 -3 14.4 18.58 0
 7 -9 3 18.11 25.25 0
 -9 -9 -3 55.99 21.42 0
 9 -9 3 41.45 24.97 0
 -9 9 -3 40.73 26.9 0
 9 9 3 47.28 15.51 0
 -9 -9 -3 53.92 21.24 0
 -9 9 -3 46.26 26.16 0
 9 9 3 46.21 17.5 0
 9 -9 3 47.92 24.07 0
 11 -9 3 53.73 27.36 0
 -11 9 -3 46.25 23.61 0
 -11 -9 -3 51.12 17.28 0
 11 9 3 49.62 20.07 0
 11 -9 3 54.73 27.73 0
 11 9 3 49.05 16.71 0
 -11 9 -3 56.08 23.49 0
 -11 -9 -3 54.25 16.65 0
 13 -9 3 10.11 27.13 0
 13 -9 3 4.85 27.22 0
 -13 -9 -3 0.77 16.64 0
 13 9 3 14.01 16.11 0
 -13 -9 -3 3.75 16.63 0
 -13 9 -3 2.9 26.33 0
 13 9 3 14.57 16.6 0
 -15 -9 -3 18.8 19.33 0
 15 9 3 14.19 15.73 0
 -15 -9 -3 18.51 16.45 0
 15 -9 3 11.66 26.95 0
 -15 9 -3 4.82 24.12 0
 -15 9 -3 3.69 23.27 0
 15 -9 3 7.52 24.3 0
 15 9 3 23.03 16.11 0
 -17 9 -3 35.28 23.13 0
 -17 -9 -3 42.89 19.78 0
 17 -9 3 37.99 23.54 0
 17 9 3 41.43 15.96 0
 17 -9 3 35.43 23.03 0
 17 9 3 48.29 16.43 0
 -17 -9 -3 42.48 16.71 0
 -17 9 -3 26.38 22.49 0
 -19 -9 -3 26.8 15.73 0
 19 9 3 14.69 15.65 0
 -19 -9 -3 16.91 16.23 0
 19 -9 3 12.65 19.39 0
 -19 9 -3 19.52 22.04 0
 19 -9 3 12.25 21.92 0
 -19 9 -3 14.58 18.22 0
 19 9 3 16.35 15.59 0
 21 9 3 6.11 15.38 0
 21 -9 3 19.39 22.69 0
 21 9 3 16.35 15.85 0
 -21 9 -3 9.91 21.31 0
 -21 -9 -3 26.8 15.63 0
 21 -9 3 9.86 18.85 0
 -21 9 -3 12.57 22.7 0
 -21 -9 -3 5.94 16.56 0
 23 9 3 6.56 10.85 0
 -23 -9 -3 -2.35 15.45 0
 -23 -9 -3 -2.22 15.43 0
 -23 9 -3 5.05 22.28 0
 23 9 3 3.61 14.7 0
 -23 9 -3 -5.27 18.05 0
 23 -9 3 -6.02 19.19 0
 23 -9 3 -4.84 22.57 0
 24 10 -3 10.82 15.15 0
 24 10 -3 12.01 14.8 0
 -24 -10 3 8.37 16.34 0
 -24 -10 3 -3.21 15.55 0
 -22 -10 3 31 15.52 0
 -22 -10 3 32.48 16.72 0
 22 10 -3 25.58 16.82 0
 22 10 -3 42.76 15.83 0
 20 10 -3 17.35 14.83 0
 20 10 -3 8.23 15.58 0
 -20 -10 3 -1.23 16.1 0
 -18 -10 3 -0.67 15.75 0
 18 10 -3 6.15 15.47 0
 18 10 -3 -0.78 15.94 0
 -18 -10 3 11.65 14.62 0
 -16 -10 3 95.81 16.71 0
 16 10 -3 101.23 15.69 0
 16 10 -3 80.51 20.76 0
 -16 -10 3 88.84 15.65 0
 14 10 -3 13.74 16.06 0
 14 10 -3 14.56 18.91 0
 -14 -10 3 4.06 16.97 0
 -14 -10 3 4.75 15.6 0
 -12 -10 3 26.34 16.68 0
 12 10 -3 9.37 16.17 0
 -12 -10 3 8.29 18.89 0
 12 10 -3 10.64 16.32 0
 10 10 -3 -5.57 18.24 0
 10 10 -3 1.16 16.2 0
 -10 -10 3 2.47 21.26 0
 -10 -10 3 22.96 16.02 0
 8 10 -3 8.35 15.81 0
 8 10 -3 1.02 20.86 0
 -8 -10 3 -9.33 19.91 0
 -8 -10 3 8.02 16.58 0
 -6 -10 3 -5.42 15.74 0
 -6 -10 3 4.62 21.07 0
 6 10 -3 7.33 19.36 0
 6 10 -3 -1.92 17.74 0
 -4 -10 3 23.59 18.09 0
 4 10 -3 18.79 19.25 0
 -4 -10 3 12.98 19.91 0
 4 10 -3 29.58 20.92 0
 2 10 -3 37.48 19.81 0
 -2 -10 3 50.76 22.11 0
 2 10 -3 37.2 18.61 0
 -2 -10 3 41.18 20.16 0
 0 10 -3 4.62 19.12 0
 0 10 3 -4.88 24.73 0
 0 -10 3 6.24 19.47 0
 0 10 -3 5.49 17.62 0
 0 -10 -3 -0.54 24.7 0
 0 -10 3 -0.95 20.14 0
 0 10 3 6.49 25.73 0
 0 -10 -3 1.19 26.89 0
 2 10 3 7.04 18.43 0
 -2 -10 -3 16.29 21.71 0
 -2 -10 -3 9.15 21.17 0
 2 -10 3 12.88 24.47 0
 -2 10 -3 12.77 20.49 0
 2 10 3 6.6 22.78 0
 2 -10 3 16.1 22.88 0
 -2 10 -3 7.42 18.42 0
 4 -10 3 11.65 23.89 0
 4 10 3 8.67 19.72 0
 -4 -10 -3 -6.63 20.52 0
 -4 -10 -3 2.75 19.27 0
 4 -10 3 8.9 26.05 0
 4 10 3 7.74 19.15 0
 -4 10 -3 7.25 26.1 0
 -4 10 -3 7.76 24.88 0
 -6 -10 -3 1.26 16.67 0
 6 -10 3 3.33 29.52 0
 6 -10 3 -2.24 27.26 0
 -6 10 -3 4.84 25.62 0
 6 10 3 -11.95 20.92 0
 -6 10 -3 4.36 26.03 0
 6 10 3 5.75 19.87 0
 -6 -10 -3 -2.18 16.04 0
 -8 -10 -3 62.88 16.47 0
 8 -10 3 67.44 33.16 0
 8 -10 3 79.67 33.5 0
 -8 10 -3 59.8 30.88 0
 -8 10 -3 53.27 29.74 0
 -8 -10 -3 60.68 20.83 0
 8 10 3 64.13 17.72 0
 8 10 3 64.35 17.11 0
 10 10 3 -8.41 16.48 0
 10 10 3 11.32 19.82 0
 -10 10 -3 -1.54 32.19 0
 -10 10 -3 -2.8 33.75 0
 10 -10 3 3.04 37.06 0
 -10 -10 -3 -1.66 16.34 0
 -10 -10 -3 13.79 16.25 0
 10 -10 3 2.88 34.64 0
 -12 10 -3 6.28 35.43 0
 -12 10 -3 7.16 33.98 0
 12 10 3 10.93 16.13 0
 12 10 3 17.49 16.12 0
 -12 -10 -3 4.32 19.44 0
 -12 -10 -3 19.14 16.07 0
 12 -10 3 9.96 42.51 0
 -14 10 -3 3.99 34.22 0
 -14 -10 -3 1.21 16.3 0
 -14 10 -3 0.7 35.8 0
 14 10 3 -7.68 14.74 0
 -14 -10 -3 -13.32 14.6 0
 14 10 3 20.09 18.76 0
 -16 -10 -3 8.63 15.96 0
 16 -10 3 6.34 39.11 0
 16 -10 3 1.81 44.63 0
 -16 -10 -3 5.63 15.76 0
 16 10 3 2.01 15.4 0
 -16 10 -3 8.6 35.88 0
 -16 10 -3 2.26 32.89 0
 16 10 3 15.83 15.21 0
 -18 10 -3 13.32 29.48 0
 -18 -10 -3 1.17 15.64 0
 18 -10 3 12.63 32.15 0
 -18 -10 -3 2.61 14.94 0
 -18 10 -3 6.06 28.99 0
 18 -10 3 10.81 35.03 0
 18 10 3 9.75 15.07 0
 18 10 3 20.9 15.66 0
 20 10 3 36.75 16.02 0
 20 -10 3 27.24 32 0
 20 -10 3 24.44 32.84 0
 -20 10 -3 20.39 27.35 0
 -20 -10 -3 22.01 15.07 0
 -20 -10 -3 18.45 15.39 0
 20 10 3 17.43 15.26 0
 -19 -11 3 16.07 14.97 0
 19 11 -3 16.91 16.87 0
 -19 -11 3 -0.64 13.87 0
 19 11 -3 -2.44 15.03 0
 17 11 -3 13.07 14.44 0
 -17 -11 3 14.09 14.79 0
 17 11 -3 -1.19 15.18 0
 -17 -11 3 12.22 16.65 0
 -15 -11 3 25.73 16.21 0
 15 11 -3 31.07 14.86 0
 15 11 -3 36.28 16.42 0
 -15 -11 3 17.62 18.51 0
 -13 -11 3 128.14 16.86 0
 -13 -11 3 143.54 16.3 0
 13 11 -3 141.48 16.87 0
 13 11 -3 123.25 15.99 0
 11 11 -3 -6.09 15.35 0
 11 11 -3 4.34 20.31 0
 -11 -11 3 6.84 17.12 0
 -11 -11 3 2.61 18.73 0
 9 11 -3 -5.81 19.2 0
 -9 -11 3 10.01 15.35 0
 9 11 -3 6 20.9 0
 -9 -11 3 7.13 17.25 0
 7 11 -3 53 19.35 0
 -7 -11 3 54.57 21.07 0
 7 11 -3 47.68 18.44 0
 -7 -11 3 46.4 19.18 0
 5 11 -3 -2.08 18.46 0
 5 11 -3 -0.49 20.74 0
 -5 -11 3 3.95 16.6 0
 -5 -11 3 -0.95 15.23 0
 3 11 -3 15.78 18.88 0
 -3 -11 3 4.76 19.07 0
 3 11 -3 2.02 20.74 0
 -3 -11 3 15.88 20.88 0
 1 11 -3 17.87 18.09 0
 -1 -11 3 32.09 24.19 0
 -1 -11 3 23.66 19.4 0
 1 11 -3 21.76 20.4 0
 -1 11 -3 -0.61 23.22 0
 1 11 3 5.33 22.81 0
 -1 11 -3 -3.74 21.9 0
 1 11 3 0.05 24.61 0
 1 -11 3 2.93 23.94 0
 -1 -11 -3 6.64 27.58 0
 -1 -11 -3 6.68 23.69 0
 1 -11 3 2.62 22.11 0
 -3 11 -3 24.3 22.58 0
 -3 -11 -3 22.89 21.43 0
 3 11 3 23.74 19.17 0
 -3 11 -3 20.41 24.85 0
 -3 -11 -3 21.99 23.33 0
 3 -11 3 21.03 25.2 0
 3 11 3 27.4 22.42 0
 3 -11 3 16.45 26.59 0
 -5 11 -3 -3.61 30.92 0
 -5 -11 -3 8.22 18.52 0
 5 11 3 -10.05 19.64 0
 5 -11 3 3.39 34.08 0
 -5 11 -3 4.46 29.1 0
 -5 -11 -3 -1.96 20.38 0
 5 -11 3 7.27 32.14 0
 5 11 3 -5.58 22.37 0
 -7 -11 -3 3.3 18.81 0
 7 11 3 8.24 15.35 0
 7 11 3 6.28 19.34 0
 -7 -11 -3 0.68 20.15 0
 -9 -11 -3 24.41 17.51 0
 9 11 3 25.48 20.37 0
 9 11 3 23.71 20.41 0
 11 11 3 8.92 17 0
 -11 -11 -3 2.29 21.48 0
 -11 -11 -3 18.13 20.36 0
 11 11 3 13.18 20.13 0
 -13 -11 -3 1.59 16.43 0
 -13 -11 -3 -3 15.56 0
 13 11 3 -0.82 16.22 0
 13 11 3 -2.38 15.74 0
 -15 -11 -3 21.36 15.11 0
 -15 -11 -3 12.72 19.51 0
 15 11 3 8.32 16.03 0
 15 11 3 18.01 15.83 0
 -17 -11 -3 16.76 15.78 0
 17 11 3 -1.94 15.76 0
 17 11 3 14.63 15.82 0
 14 12 -3 7.24 16.38 0
 14 12 -3 -3.25 18.26 0
 -14 -12 3 19.94 20.11 0
 12 12 -3 54.41 15.31 0
 -12 -12 3 85.06 20.86 0
 -12 -12 3 58.79 19.14 0
 12 12 -3 66.76 16.56 0
 10 12 -3 67.1 20.21 0
 10 12 -3 50.09 16.2 0
 -10 -12 3 61.89 18.74 0
 -10 -12 3 63.59 16.89 0
 -8 -12 3 4.65 18.55 0
 8 12 -3 6.66 18.33 0
 8 12 -3 14.4 20.06 0
 -8 -12 3 10.02 19.77 0
 -6 -12 3 8.07 19.48 0
 6 12 -3 4.85 17.88 0
 6 12 -3 -1.73 19.24 0
 -6 -12 3 -3.94 17.61 0
 4 12 -3 17.69 23.47 0
 -4 -12 3 18.63 21.51 0
 -4 -12 3 16.29 23.83 0
 4 12 -3 21.81 20.56 0
 2 12 -3 2.95 17.28 0
 -2 -12 3 2.28 21.81 0
 2 12 -3 9.58 22.75 0
 -2 -12 3 9.67 23.58 0
 0 12 -3 15.33 22.7 0
 0 12 -3 21.09 23.24 0
 0 -12 3 27.38 25.23 0
 0 -12 3 12.59 26.56 0
 -2 -12 -3 14.55 29.54 0
 2 -12 3 20.06 31.86 0
 2 12 3 15.83 26.32 0
 -2 12 -3 16.46 28.98 0
 -2 -12 -3 16.21 28.01 0
 -2 12 -3 10.8 26.78 0
 2 12 3 16.96 28.27 0
 2 -12 3 10.57 32.62 0
 -4 -12 -3 5.35 21.51 0
 4 12 3 10.13 22.06 0
 -4 -12 -3 3.59 22.55 0
 4 12 3 5.93 22.48 0
 6 12 3 99.5 20.12 0
 -6 -12 -3 93.08 23.44 0
 6 12 3 102.52 19.73 0
 -6 -12 -3 97.29 19.29 0
 -8 -12 -3 1.63 19.81 0
 8 12 3 -1.68 19.67 0
 8 12 3 -4.03 20.09 0
 -8 -12 -3 -6.11 18.81 0
 10 12 3 14.21 19.42 0
 10 12 3 8.97 15.87 0
 -10 -12 -3 6.06 20.2 0
 -10 -12 -3 8.67 15.37 0
 38 0 -4 -0.92 14.95 0
 -38 0 4 14.21 14.41 0
 38 0 -4 3.71 14.57 0
 -38 0 4 34.67 15.32 0
 -36 0 4 78.22 16.1 0
 -36 0 4 69.91 15.5 0
 36 0 -4 68.67 15.55 0
 36 0 -4 60.53 15.57 0
 -34 0 4 254 13.07 0
 34 0 -4 223.09 16.31 0
 -34 0 4 212.03 15.64 0
 34 0 -4 205.98 15.93 0
 -32 0 4 439.45 18.16 0
 32 0 -4 405.4 17.47 0
 -32 0 4 478.25 18.23 0
 32 0 -4 404.36 18.92 0
 30 0 -4 865.15 20.16 0
 30 0 -4 727.61 16.17 0
 -30 0 4 922 20.91 0
 -30 0 4 841.74 20.01 0
 28 0 -4 90.81 17.62 0
 28 0 -4 101.3 17.15 0
 -28 0 4 107.38 17.21 0
 -28 0 4 98.6 17.08 0
 26 0 -4 213.33 18.52 0
 -26 0 4 259.71 19.01 0
 26 0 -4 198.62 18.68 0
 -26 0 4 216.84 18.85 0
 -24 0 4 841.05 21.26 0
 24 0 -4 687.04 21.05 0
 -24 0 4 752.21 21.27 0
 24 0 -4 749.79 20.81 0
 22 0 -4 54.23 18.26 0
 -22 0 4 47.07 19.76 0
 -22 0 4 46.54 19.54 0
 22 0 -4 57.97 18.02 0
 -20 0 4 86.26 20.19 0
 20 0 -4 93.02 20.04 0
 20 0 -4 83.93 19.38 0
 -20 0 4 69.04 19.74 0
 -18 0 4 187.63 21.92 0
 18 0 -4 187.14 21.68 0
 -18 0 4 203.14 22.39 0
 18 0 -4 181.8 21.42 0
 -16 0 4 694.41 25.14 0
 -16 0 4 676.44 25.11 0
 16 0 -4 655.34 25.78 0
 16 0 -4 612.06 24.58 0
 14 0 -4 24.13 26.42 0
 14 0 -4 14.18 17.59 0
 -14 0 4 18.48 27.05 0
 -14 0 4 22.23 25.55 0
 -12 0 4 13.61 25.88 0
 12 0 -4 13.09 25.81 0
 12 0 -4 1.45 26.46 0
 -12 0 4 10.44 26.65 0
 -10 0 4 795.72 26.23 0
 10 0 -4 859.74 32.93 0
 10 0 -4 799.95 26.71 0
 -10 0 4 873.86 32.81 0
 -8 0 4 524.88 34.06 0
 8 0 -4 479.85 34.36 0
 8 0 -4 493.04 34.04 0
 -8 0 4 481.83 34.17 0
 -6 0 4 1097.09 41.77 0
 6 0 -4 1107.2 43.18 0
 -6 0 4 1146.53 43.42 0
 6 0 -4 1085.3 42.77 0
 4 0 -4 87.47 38.91 0
 -4 0 4 88.31 38.86 0
 -4 0 4 86.27 39.49 0
 4 0 -4 81.7 38.77 0
 -2 0 4 1979.4 49.54 0
 2 0 -4 1935.28 50.02 0
 2 0 -4 1989.04 50.06 0
 -2 0 4 2071.64 51.49 0
 0 0 -4 427.14 42.35 0
 0 0 4 428.67 44.18 0
 0 0 4 395.99 41.97 0
 0 0 -4 409.93 42.18 0
 2 0 4 26.21 37.95 0
 2 0 4 22.76 26.43 0
 -2 0 -4 27.94 39.03 0
 -2 0 -4 32.9 38.47 0
 -4 0 -4 30.89 22.5 0
 4 0 4 27.1 21.79 0
 4 0 4 38.02 22.9 0
 -4 0 -4 19.51 30.51 0
 -6 0 -4 8661.2 60.81 0
 -6 0 -4 7510.97 56.04 0
 6 0 4 8312.91 56.17 0
 6 0 4 8008.82 57.83 0
 8 0 4 132.75 28.1 0
 8 0 4 145.37 28.89 0
 -8 0 -4 165.25 29.12 0
 -8 0 -4 148.11 27.6 0
 10 0 4 301.68 27.84 0
 10 0 4 323.7 30.14 0
 -10 0 -4 274.51 21.21 0
 -10 0 -4 292.26 21.19 0
 12 0 4 463.29 25.99 0
 -12 0 -4 465.46 26.4 0
 12 0 4 425.87 25.19 0
 -12 0 -4 398.1 25.37 0
 -14 0 -4 10.99 20.43 0
 14 0 4 25.31 21.28 0
 -14 0 -4 28.15 21 0
 14 0 4 34.21 19.7 0
 16 0 4 98.77 19.71 0
 -16 0 -4 86.32 19.26 0
 -16 0 -4 107.19 21.33 0
 16 0 4 101.64 19.42 0
 18 0 4 78.74 19.11 0
 -18 0 -4 127.18 19.87 0
 -18 0 -4 81.79 14 0
 18 0 4 85.68 18.85 0
 20 0 4 23.73 17.68 0
 -20 0 -4 20.74 18.68 0
 -20 0 -4 11.01 12.74 0
 20 0 4 15.39 13.1 0
 -22 0 -4 538 20.21 0
 -22 0 -4 447.54 18.57 0
 22 0 4 492.77 19.79 0
 22 0 4 406.74 14.14 0
 -24 0 -4 224.91 13.32 0
 -24 0 -4 207.9 16.82 0
 24 0 4 196.64 16.55 0
 24 0 4 206.13 17.51 0
 -26 0 -4 41.87 16.04 0
 -26 0 -4 28.3 15.7 0
 26 0 4 51.57 16.64 0
 26 0 4 29.27 16.25 0
 -28 0 -4 178.8 15.63 0
 28 0 4 168.3 16.35 0
 -28 0 -4 191.47 17.04 0
 28 0 4 182.49 15.98 0
 -30 0 -4 64.56 16.33 0
 -30 0 -4 43.21 14.95 0
 30 0 4 54.7 14.36 0
 30 0 4 57.97 15 0
 32 0 4 277.12 16.18 0
 -32 0 -4 296.93 16.38 0
 32 0 4 229.75 12.16 0
 -32 0 -4 224.31 15.52 0
 34 0 4 4.26 14.24 0
 -34 0 -4 39.01 14.97 0
 -34 0 -4 12.86 13.88 0
 34 0 4 13.35 14.57 0
 -37 -1 4 36.1 14.48 0
 -37 1 4 36.24 14.59 0
 37 -1 -4 36.06 15.05 0
 37 -1 -4 36.46 14.85 0
 -37 1 4 60.77 16.56 0
 -37 -1 4 37.44 14.48 0
 37 1 -4 40.38 10.63 0
 37 1 -4 22.63 14.9 0
 35 -1 -4 137.42 15.83 0
 35 1 -4 148.55 15.51 0
 -35 1 4 131.77 15.93 0
 35 -1 -4 118.19 11.22 0
 35 1 -4 146.7 15.89 0
 -35 -1 4 160.48 11.92 0
 -35 1 4 186.95 16.08 0
 -35 -1 4 148.42 15.47 0
 -33 -1 4 8.03 14.82 0
 -33 1 4 5.14 16.53 0
 -33 -1 4 22.95 15.16 0
 33 1 -4 16.88 14.68 0
 33 1 -4 6.16 14.37 0
 33 -1 -4 12.62 16 0
 33 -1 -4 24.53 16.22 0
 -33 1 4 6.87 15.45 0
 -31 -1 4 5.27 15.07 0
 -31 -1 4 10.03 15.46 0
 31 1 -4 -0.01 10.98 0
 31 -1 -4 14.39 16.29 0
 -31 1 4 9.46 15.42 0
 31 -1 -4 6.85 16.66 0
 31 1 -4 8.75 15.67 0
 -31 1 4 13.05 16.72 0
 -29 -1 4 28.51 16.07 0
 29 1 -4 6.45 15.93 0
 -29 1 4 24.98 17.61 0
 -29 1 4 16.36 11.83 0
 29 -1 -4 27.88 16.24 0
 -29 -1 4 13.21 16.19 0
 29 -1 -4 13.68 11.49 0
 29 1 -4 12.39 15.85 0
 27 -1 -4 45.31 18.12 0
 -27 1 4 34.86 18.46 0
 -27 -1 4 50.6 16.55 0
 27 1 -4 42 16.74 0
 27 1 -4 29.68 17.23 0
 -27 -1 4 55.63 17.03 0
 27 -1 -4 31.68 17.82 0
 -27 1 4 38.79 17.84 0
 -25 -1 4 89.23 18.17 0
 -25 -1 4 57.71 17.73 0
 25 1 -4 80.12 17.55 0
 -25 1 4 88.04 18.44 0
 25 1 -4 73.42 12.71 0
 25 -1 -4 78.88 18.42 0
 -25 1 4 75.04 19.06 0
 25 -1 -4 61 18.44 0
 -23 -1 4 18.02 13.12 0
 -23 -1 4 15.1 18.32 0
 -23 1 4 22.51 17.8 0
 23 1 -4 31.47 18.52 0
 23 -1 -4 31.49 16.89 0
 23 -1 -4 30.9 17.27 0
 23 1 -4 15.1 18.32 0
 -23 1 4 33.03 18.45 0
 -21 1 4 1385.07 24.16 0
 -21 -1 4 1376.29 24.14 0
 21 -1 -4 1178.13 24.04 0
 -21 -1 4 1288.62 24.51 0
 21 1 -4 1180.83 19.27 0
 21 1 -4 1266.68 23.52 0
 21 -1 -4 1262.31 23.87 0
 -21 1 4 1318.18 24.33 0
 19 1 -4 9.16 13.19 0
 -19 1 4 2.93 18.64 0
 19 -1 -4 -3.06 18.68 0
 -19 -1 4 8.34 18.92 0
 19 1 -4 -4.21 13.6 0
 -19 -1 4 24.91 19.39 0
 19 -1 -4 -7.64 18.8 0
 -19 1 4 -14.54 19.17 0
 -17 -1 4 243.32 22.8 0
 17 -1 -4 235.77 22.27 0
 -17 -1 4 251.96 22.42 0
 17 1 -4 232.79 21.96 0
 17 1 -4 243.73 22.65 0
 -17 1 4 249.4 22.59 0
 -17 1 4 236.99 23.07 0
 17 -1 -4 240.01 22.83 0
 -15 -1 4 294.87 26.31 0
 -15 1 4 294.6 24.42 0
 15 1 -4 291.43 19.71 0
 -15 -1 4 290.16 27.2 0
 -15 1 4 292.62 24.99 0
 15 -1 -4 281.18 24.76 0
 15 -1 -4 254 24.63 0
 15 1 -4 255.09 26.25 0
 13 1 -4 6.18 27.28 0
 -13 1 4 14 26.44 0
 -13 1 4 4.73 26.07 0
 -13 -1 4 12.53 26.97 0
 13 1 -4 -4.66 26.83 0
 13 -1 -4 6.29 25.72 0
 -13 -1 4 9.2 27.07 0
 13 -1 -4 11.79 25.69 0
 11 1 -4 5229.19 48.28 0
 -11 1 4 5042.08 51.68 0
 -11 1 4 5593.16 52.92 0
 11 1 -4 5314.47 48.26 0
 11 -1 -4 5083.9 51.68 0
 -11 -1 4 5228.54 47.68 0
 -11 -1 4 5549.09 48.62 0
 11 -1 -4 5255.76 51.67 0
 -9 1 4 1498.37 36.96 0
 9 1 -4 1395.36 34.92 0
 -9 -1 4 1514.42 29.52 0
 9 -1 -4 1390.18 41.66 0
 -9 1 4 1373.38 36.23 0
 9 1 -4 1468.15 34.79 0
 9 -1 -4 1408.13 35.98 0
 -9 -1 4 1436.04 34.76 0
 -7 1 4 27.46 31.09 0
 7 -1 -4 32.28 30.61 0
 7 -1 -4 36.28 31.88 0
 7 1 -4 25.22 23.08 0
 -7 1 4 38.94 38.85 0
 -7 -1 4 32.49 32.44 0
 7 1 -4 31.49 33.83 0
 -5 1 4 232.96 44.03 0
 -5 -1 4 241.1 37.37 0
 5 -1 -4 223.75 36.28 0
 5 1 -4 236.62 38.63 0
 -5 1 4 227.27 35.72 0
 -5 -1 4 251.82 37.9 0
 5 1 -4 226.57 37.57 0
 5 -1 -4 236.76 37.58 0
 -3 -1 4 100.27 40.19 0
 3 -1 -4 103.35 38.37 0
 -3 -1 4 92.85 27.76 0
 -3 1 4 100.52 37.5 0
 3 1 -4 108.2 38.45 0
 3 -1 -4 97.69 37.97 0
 -3 1 4 103.05 47.5 0
 3 1 -4 106.91 37.86 0
 -1 1 4 540.32 44.14 0
 1 1 -4 562.05 38.8 0
 1 -1 -4 543.86 41.66 0
 -1 -1 4 552.3 41.25 0
 -1 -1 4 543.11 39.96 0
 -1 1 4 538.33 41.64 0
 1 1 -4 578.19 41.44 0
 1 -1 -4 573.65 42.2 0
 -1 -1 -4 3540.14 55.21 0
 -1 1 -4 3296.92 44.51 0
 1 -1 4 3356.17 50.92 0
 1 1 4 3323.45 53 0
 -1 1 -4 3606.21 53.33 0
 1 1 4 3482.39 54.92 0
 1 -1 4 3618.63 52.03 0
 -1 -1 -4 3370.56 53.88 0
 3 -1 4 -4.04 32.13 0
 3 1 4 -4.58 29.53 0
 3 -1 4 3.42 22.1 0
 -3 1 -4 0.29 32.28 0
 3 1 4 -4.53 31.55 0
 -3 -1 -4 -3.16 31.74 0
 -3 -1 -4 6.19 31.81 0
 -3 1 -4 -8.21 29.87 0
 -5 -1 -4 1270.63 36.5 0
 5 1 4 1122.3 35.58 0
 5 1 4 1219.66 36.68 0
 -5 1 -4 1234.76 35.91 0
 5 -1 4 1110.26 34.56 0
 5 -1 4 1190.57 35.07 0
 -5 1 -4 1093.46 33.73 0
 -5 -1 -4 1132.57 35.1 0
 -7 1 -4 1059.95 31.39 0
 -7 -1 -4 1151.61 33.54 0
 7 -1 4 1167.62 33.36 0
 7 -1 4 1052.15 32.16 0
 7 1 4 1043.89 32.94 0
 -7 1 -4 1108.9 33.01 0
 -7 -1 -4 1039.02 32.89 0
 7 1 4 1092.58 27.09 0
 9 1 4 154.02 29.85 0
 9 1 4 105.53 29 0
 -9 -1 -4 136.22 28.98 0
 -9 1 -4 145.66 28.57 0
 9 -1 4 127.56 27.86 0
 -9 1 -4 126.32 26.88 0
 9 -1 4 124.87 27.11 0
 -9 -1 -4 129.15 29.61 0
 11 -1 4 1911.4 32.37 0
 -11 -1 -4 2003.53 33.9 0
 -11 1 -4 1829.58 31.47 0
 -11 1 -4 1976.29 32.5 0
 11 -1 4 1767.85 31.98 0
 -11 -1 -4 1820.02 32.65 0
 11 1 4 1943.32 33.91 0
 11 1 4 1705.26 32.43 0
 -13 -1 -4 138.79 22.92 0
 13 -1 4 124.99 21.51 0
 -13 -1 -4 131.82 21.69 0
 -13 1 -4 110.71 21.44 0
 13 1 4 105.78 15.44 0
 -13 1 -4 135.38 22.68 0
 13 1 4 133.28 22.24 0
 13 -1 4 112.56 21.49 0
 15 -1 4 10.97 19.55 0
 15 1 4 6.56 19.63 0
 15 1 4 6.94 18.77 0
 15 -1 4 12.34 13.84 0
 -15 -1 -4 10.48 18.66 0
 -15 1 -4 14.54 19.74 0
 -15 -1 -4 20.55 19.85 0
 -15 1 -4 14.72 20.39 0
 17 1 4 41.84 17.75 0
 17 1 4 43.04 18.91 0
 -17 -1 -4 79.04 19.22 0
 -17 -1 -4 48.29 18.55 0
 17 -1 4 46.23 18.44 0
 17 -1 4 41.53 13.58 0
 -17 1 -4 39.95 19 0
 -17 1 -4 54.9 19.78 0
 19 -1 4 77.75 18.5 0
 -19 -1 -4 114.54 19.14 0
 19 1 4 95.52 19.16 0
 -19 -1 -4 85.84 19.39 0
 19 1 4 64 13.65 0
 -19 1 -4 66.65 13.33 0
 -19 1 -4 87.5 18.97 0
 19 -1 4 94.6 13.33 0
 -21 1 -4 1332.44 22.95 0
 -21 1 -4 1527.03 24.23 0
 21 -1 4 1390.24 23.16 0
 -21 -1 -4 1547.47 24.37 0
 21 -1 4 1235.63 22.77 0
 -21 -1 -4 1332.44 23.25 0
 21 1 4 1309.57 19.2 0
 21 1 4 1295.85 23.13 0
 -23 1 -4 608.41 19.38 0
 23 1 4 541.84 19.52 0
 23 1 4 623.45 19.1 0
 23 -1 4 529.03 14.64 0
 23 -1 4 600.58 19.77 0
 -23 -1 -4 663.18 19.54 0
 -23 1 -4 670.22 20.93 0
 -23 -1 -4 575 18.45 0
 25 1 4 52.72 16.91 0
 -25 -1 -4 57.1 16.35 0
 -25 -1 -4 69.34 12.74 0
 25 -1 4 73.38 16 0
 25 1 4 57.36 16.79 0
 -25 1 -4 64.65 16.02 0
 -25 1 -4 47.9 12.1 0
 25 -1 4 46.42 15.99 0
 27 1 4 20.42 16.18 0
 27 -1 4 4.01 15.84 0
 -27 -1 -4 14.78 16.42 0
 27 1 4 5.36 16.05 0
 -27 1 -4 -8.59 15.82 0
 -27 1 -4 -6.08 17.11 0
 27 -1 4 10.08 15.87 0
 -27 -1 -4 4.56 16.31 0
 29 1 4 48.82 15.6 0
 -29 1 -4 30.88 15.03 0
 29 -1 4 50.47 15.07 0
 29 1 4 53.55 15.61 0
 -29 -1 -4 69.81 15.69 0
 -29 -1 -4 41.99 15.01 0
 -29 1 -4 54.11 10.52 0
 29 -1 4 41.17 15.07 0
 -31 1 -4 -10.47 15.18 0
 31 1 4 -15.33 15.13 0
 -31 1 -4 -5.95 14.7 0
 31 -1 4 -4.25 10.35 0
 -31 -1 -4 7.01 10.41 0
 31 1 4 12.37 15.02 0
 -31 -1 -4 -7.16 15.66 0
 31 -1 4 20.71 15.35 0
 33 1 4 83.16 14.57 0
 -33 -1 -4 118.65 15.4 0
 33 -1 4 78.45 14.85 0
 33 1 4 106.93 14.87 0
 33 -1 4 84.7 10.92 0
 -33 -1 -4 93.41 14.46 0
 -33 1 -4 84.99 11.15 0
 -33 1 -4 108.37 15.28 0
 -38 2 4 69.93 15.56 0
 38 -2 -4 78.06 16.71 0
 -38 -2 4 81.13 15.07 0
 -38 2 4 103.82 15.72 0
 38 -2 -4 66.8 15.72 0
 38 2 -4 75.7 14.77 0
 -38 -2 4 86.98 14.5 0
 38 2 -4 75.08 15.04 0
 36 -2 -4 6.31 15.3 0
 36 -2 -4 0.87 15.32 0
 -36 -2 4 9.73 15.41 0
 36 2 -4 7.46 14.19 0
 36 2 -4 17.67 14.58 0
 -36 2 4 1.27 14.78 0
 -36 2 4 11.71 15.89 0
 -36 -2 4 25.92 14.52 0
 34 -2 -4 105.92 16.08 0
 34 -2 -4 155.59 16.17 0
 -34 -2 4 134.22 15.74 0
 -34 2 4 149.32 16.31 0
 -34 2 4 144.25 17.45 0
 34 2 -4 119.4 10.9 0
 34 2 -4 126.27 11.78 0
 -34 -2 4 126.59 16.6 0
 -32 2 4 -10.65 16.33 0
 32 2 -4 -1.65 11.42 0
 -32 2 4 2.49 16.31 0
 -32 -2 4 -3.4 15.79 0
 -32 -2 4 9.51 11.36 0
 32 2 -4 -10.08 15.93 0
 32 -2 -4 -5.15 15.58 0
 32 -2 -4 18.06 15.65 0
 30 -2 -4 28.57 16.64 0
 30 2 -4 8.49 17.03 0
 -30 -2 4 33.94 15.61 0
 30 -2 -4 15.8 16.01 0
 -30 -2 4 39.1 17.16 0
 -30 2 4 29.26 20.55 0
 -30 2 4 28.42 16.35 0
 30 2 -4 23.23 12.1 0
 -28 2 4 54.02 17.68 0
 28 -2 -4 87.48 17.83 0
 -28 -2 4 83.26 17.69 0
 28 2 -4 73.21 16.76 0
 28 -2 -4 82.98 17.33 0
 -28 2 4 85.53 17.77 0
 28 2 -4 78.05 17.01 0
 -28 -2 4 89.56 17.05 0
 -26 2 4 65.52 18.14 0
 -26 -2 4 95.89 12.39 0
 26 -2 -4 89.03 17.56 0
 26 -2 -4 81.27 17.25 0
 -26 2 4 85.8 18.45 0
 26 2 -4 74.72 17.21 0
 -26 -2 4 75.97 12.43 0
 26 2 -4 87.82 16.89 0
 -24 -2 4 12.14 18.04 0
 -24 2 4 22.67 18.25 0
 24 -2 -4 16.76 16.8 0
 24 2 -4 7.44 17.71 0
 -24 2 4 -4.18 17.49 0
 24 -2 -4 14.17 17.13 0
 -24 -2 4 2.2 18.24 0
 24 2 -4 18.86 17.55 0
 -22 2 4 5.34 17.2 0
 -22 2 4 10.33 22.36 0
 22 2 -4 4.9 18.08 0
 -22 -2 4 25.58 19.09 0
 22 -2 -4 12.69 17.26 0
 -22 -2 4 6.32 13.22 0
 22 -2 -4 -6.61 17.09 0
 22 2 -4 19.04 18.51 0
 20 -2 -4 38.7 18.12 0
 -20 -2 4 41.04 19.05 0
 -20 2 4 37.89 17.74 0
 20 -2 -4 28.49 18.58 0
 20 2 -4 38.69 19.29 0
 20 2 -4 36.88 18.76 0
 -20 2 4 35.02 18.41 0
 -20 -2 4 46.4 13.42 0
 -18 -2 4 7.64 13.94 0
 -18 2 4 -8 20.57 0
 -18 -2 4 -12.11 18.39 0
 18 -2 -4 7.37 19.91 0
 18 -2 -4 14.4 20.5 0
 18 2 -4 -12.3 17.97 0
 -18 2 4 0.62 20.78 0
 18 2 -4 -6.24 19.01 0
 16 -2 -4 1782.42 32.32 0
 16 2 -4 2084.81 30.31 0
 -16 -2 4 2092.7 25.76 0
 -16 -2 4 1909.06 24.89 0
 -16 2 4 1984.88 33.21 0
 16 -2 -4 1987.2 32.8 0
 16 2 -4 1880.66 28.56 0
 -16 2 4 2074.9 33.72 0
 -14 -2 4 58.08 25.82 0
 14 2 -4 35.02 25.45 0
 14 -2 -4 55.6 22.8 0
 14 -2 -4 54.93 24.71 0
 14 2 -4 47.99 18.33 0
 -14 2 4 57.36 30.17 0
 -14 -2 4 54.59 25.99 0
 -14 2 4 56.89 23.67 0
 -12 -2 4 23.91 27.92 0
 -12 2 4 23.8 31.2 0
 12 -2 -4 3.03 24.1 0
 12 2 -4 9.08 28.02 0
 12 -2 -4 8.4 30.85 0
 -12 -2 4 30.69 28.15 0
 12 2 -4 29.2 27.36 0
 -12 2 4 11.55 25.65 0
 10 -2 -4 290.8 30.08 0
 10 2 -4 301.41 28.92 0
 10 2 -4 313.85 28.58 0
 -10 -2 4 297.71 28.35 0
 -10 -2 4 323.29 28.35 0
 10 -2 -4 275.47 27.47 0
 -10 2 4 287.83 30.94 0
 -10 2 4 301 31.47 0
 -8 2 4 8.95 32.06 0
 -8 2 4 10.25 24.15 0
 8 -2 -4 15.28 30.34 0
 -8 -2 4 22.8 26.82 0
 8 -2 -4 2.14 31.72 0
 8 2 -4 10.27 28.03 0
 -8 -2 4 2.32 26.79 0
 8 2 -4 1.59 27.44 0
 -6 2 4 277.48 29.02 0
 -6 -2 4 299.96 29.57 0
 6 -2 -4 304.06 34.63 0
 6 2 -4 288.05 29.73 0
 -6 2 4 323.4 35.48 0
 -6 -2 4 317.23 29.5 0
 6 2 -4 285.82 29.22 0
 -4 -2 4 2165.82 40.12 0
 4 -2 -4 2118.76 52.7 0
 -4 2 4 2054.15 47.39 0
 -4 -2 4 2255.87 40.58 0
 4 2 -4 2054.64 40.31 0
 4 2 -4 2243.6 40.55 0
 -4 2 4 2101.26 53.64 0
 4 -2 -4 2048.32 51.3 0
 -2 -2 4 119.45 22.09 0
 2 -2 -4 133.94 39.64 0
 -2 2 4 131.47 36.87 0
 2 2 -4 121.36 21.99 0
 -2 2 4 140.77 31.8 0
 -2 -2 4 125.85 30.84 0
 2 2 -4 131.37 31.02 0
 2 -2 -4 131.33 37.14 0
 0 2 -4 982.33 35.05 0
 0 -2 4 945.94 34.15 0
 0 -2 -4 856.07 37.11 0
 0 -2 -4 941.14 36.26 0
 0 2 4 909.27 41.39 0
 0 -2 4 947.06 34.17 0
 0 2 4 944.12 38.75 0
 0 2 -4 942.6 33.77 0
 2 2 4 399.45 32.63 0
 -2 2 -4 395.87 29.87 0
 2 -2 4 397.99 29.53 0
 2 2 4 350.21 30.36 0
 -2 -2 -4 402.25 31.38 0
 -2 -2 -4 352.72 31.05 0
 -2 2 -4 379.59 28.43 0
 2 -2 4 356.08 28.66 0
 4 -2 4 1607.91 35.53 0
 -4 -2 -4 1502.6 36.55 0
 4 2 4 1472.69 35.65 0
 -4 -2 -4 1705.13 37.17 0
 -4 2 -4 1568.36 35.01 0
 4 2 4 1652.13 38.04 0
 -4 2 -4 1691.21 36.44 0
 4 -2 4 1722.76 36.39 0
 6 -2 4 1014.43 31.1 0
 -6 2 -4 1008.65 30.98 0
 6 2 4 1143.84 34.08 0
 6 -2 4 1070.2 31.69 0
 -6 2 -4 1082.53 32.09 0
 -6 -2 -4 1050.65 26.56 0
 -6 -2 -4 1169.64 33.39 0
 6 2 4 1002.43 31.73 0
 8 -2 4 547.59 21.56 0
 8 2 4 666.77 32.53 0
 -8 -2 -4 634.86 24.69 0
 8 -2 4 659.91 29.02 0
 -8 2 -4 642.33 29.21 0
 8 2 4 542.43 22.54 0
 -8 2 -4 580.2 28.12 0
 -8 -2 -4 608.82 30.71 0
 10 2 4 2.43 26.14 0
 10 -2 4 15.47 23.67 0
 10 -2 4 21.69 23.5 0
 -10 -2 -4 22.18 25.08 0
 -10 -2 -4 15.32 26.22 0
 -10 2 -4 5.82 22.54 0
 -10 2 -4 16.62 23.89 0
 10 2 4 4.17 18.1 0
 -12 2 -4 550.62 23.86 0
 -12 2 -4 589.61 24.71 0
 12 -2 4 497.48 23.83 0
 12 2 4 569.14 24.43 0
 12 -2 4 558.29 24.82 0
 -12 -2 -4 574.45 24.82 0
 -12 -2 -4 542.17 23.78 0
 12 2 4 497.43 18.02 0
 14 2 4 22.65 19.3 0
 14 2 4 25.3 18.74 0
 14 -2 4 27.07 20.01 0
 -14 -2 -4 40.33 19 0
 14 -2 4 37.5 18.89 0
 -14 2 -4 28.23 19.53 0
 -14 2 -4 37.89 19.15 0
 -14 -2 -4 32.16 19.39 0
 -16 -2 -4 1006.24 23.25 0
 -16 2 -4 1054.25 18.68 0
 16 -2 4 946.8 22.63 0
 -16 2 -4 1000.13 23.58 0
 -16 -2 -4 1083.65 19.61 0
 16 2 4 1098.56 24.05 0
 16 2 4 921.5 18.51 0
 16 -2 4 1040.6 22.06 0
 -18 -2 -4 1047.86 23.33 0
 18 -2 4 965.4 22.35 0
 18 -2 4 929.65 21.62 0
 18 2 4 919.8 22.42 0
 -18 -2 -4 1003.44 22.81 0
 -18 2 -4 929.48 21.91 0
 -18 2 -4 1067.35 22.8 0
 18 2 4 960.92 18.45 0
 20 -2 4 12.05 18.31 0
 -20 -2 -4 -3.26 20 0
 20 2 4 18.49 18.28 0
 -20 2 -4 5.07 19.21 0
 -20 -2 -4 3.03 18.49 0
 20 -2 4 15.66 17.93 0
 -20 2 -4 19.53 17.45 0
 20 2 4 4.78 19.15 0
 22 -2 4 -3.82 17.6 0
 22 2 4 19.79 16.61 0
 -22 2 -4 -6.05 18.44 0
 -22 -2 -4 0.03 17.44 0
 22 2 4 -8.53 17.27 0
 -22 2 -4 3.57 17.41 0
 22 -2 4 7.68 17.55 0
 -22 -2 -4 15.92 16.63 0
 -24 -2 -4 72.21 17.63 0
 -24 -2 -4 82.91 17.7 0
 24 2 4 75.61 17.13 0
 -24 2 -4 84.85 13.3 0
 24 -2 4 73.9 16.02 0
 24 2 4 78.36 17.17 0
 24 -2 4 77.25 16.66 0
 -24 2 -4 82.93 15.72 0
 26 2 4 246.72 17.61 0
 -26 2 -4 246.35 17.85 0
 26 -2 4 276.17 17.46 0
 -26 2 -4 292.04 18.93 0
 -26 -2 -4 260.64 13.55 0
 -26 -2 -4 231.87 13.17 0
 26 -2 4 214.62 17.81 0
 26 2 4 242.98 13.08 0
 -28 -2 -4 398.17 12.39 0
 28 -2 4 410.46 17.81 0
 28 2 4 422.75 17.36 0
 -28 -2 -4 467.18 18.04 0
 -28 2 -4 462.36 19.58 0
 28 2 4 391.28 17.32 0
 28 -2 4 327.95 14.22 0
 -28 2 -4 397.18 18.16 0
 -30 -2 -4 8.04 15.79 0
 30 -2 4 19.75 15.55 0
 -30 -2 -4 -0.39 15.15 0
 -30 2 -4 14.17 14.79 0
 30 -2 4 6.54 15.14 0
 30 2 4 0.07 15.59 0
 30 2 4 -8.72 15.7 0
 -30 2 -4 1.33 15.9 0
 -32 2 -4 12.41 15.23 0
 -32 -2 -4 -1.46 14.7 0
 -32 2 -4 8.01 14.33 0
 -32 -2 -4 0.01 14.35 0
 32 2 4 -0.55 14.35 0
 32 -2 4 -1.65 15.1 0
 32 2 4 19.58 14.11 0
 32 -2 4 13.41 15.07 0
 -34 2 -4 19.94 14.1 0
 34 -2 4 8.35 15.58 0
 -34 -2 -4 5.36 15.18 0
 34 2 4 -0.05 10.24 0
 -34 -2 -4 12.84 14.55 0
 34 2 4 32 13.67 0
 34 -2 4 5.37 14.55 0
 -34 2 -4 17.41 15.94 0
 -37 -3 4 13 10.88 0
 37 3 -4 23.02 14.81 0
 -37 3 4 19.48 16.05 0
 37 -3 -4 17.5 15.7 0
 -37 3 4 26.21 14.91 0
 37 3 -4 17.05 14.73 0
 -37 -3 4 29.27 14.62 0
 37 -3 -4 23.05 15.55 0
 -35 -3 4 75.62 15.69 0
 35 3 -4 85.57 15 0
 35 -3 -4 63.92 19.54 0
 -35 3 4 71.37 14.79 0
 -35 3 4 62.62 15.62 0
 -35 -3 4 80.12 15.4 0
 35 3 -4 60.01 15.31 0
 35 -3 -4 66.91 16.38 0
 33 3 -4 38.35 11.34 0
 -33 -3 4 42.6 16.2 0
 -33 3 4 32.54 15.63 0
 33 -3 -4 39.22 15.3 0
 -33 3 4 48.74 16.85 0
 33 -3 -4 43.51 15.38 0
 -33 -3 4 44.8 15.85 0
 33 3 -4 39.73 15.53 0
 31 3 -4 280.64 16.27 0
 31 -3 -4 281.85 17.49 0
 -31 -3 4 298.83 17.01 0
 -31 3 4 280.13 16.82 0
 -31 3 4 351.08 18.23 0
 31 3 -4 295.06 16.68 0
 -31 -3 4 288.31 17.55 0
 31 -3 -4 282.24 17.37 0
 -29 -3 4 7.98 17.36 0
 29 -3 -4 -6.35 16.27 0
 -29 3 4 1.28 16.65 0
 -29 3 4 9.62 19.66 0
 -29 -3 4 20.36 16.36 0
 29 3 -4 17.43 16.14 0
 29 -3 -4 6.31 19.21 0
 29 3 -4 3.07 16.57 0
 -27 3 4 148.84 20.77 0
 -27 3 4 167.33 17.73 0
 -27 -3 4 183.24 17.52 0
 -27 -3 4 159.68 18.52 0
 27 -3 -4 139.57 17.58 0
 27 3 -4 189.73 17.37 0
 27 3 -4 141.09 17.42 0
 27 -3 -4 147.6 17.31 0
 25 3 -4 153.44 13.04 0
 -25 -3 4 158.51 17.73 0
 25 3 -4 134.29 17.41 0
 -25 -3 4 162.47 17.73 0
 -25 3 4 172.8 19.05 0
 -25 3 4 146.24 18.03 0
 25 -3 -4 137.19 18.08 0
 25 -3 -4 167.13 17.83 0
 23 3 -4 118.2 18.52 0
 -23 3 4 125.12 18.41 0
 23 -3 -4 115.73 19.73 0
 -23 -3 4 81.4 18.41 0
 23 3 -4 115.42 18.12 0
 23 -3 -4 114.73 17.32 0
 -23 3 4 107.62 18.54 0
 -23 -3 4 119.37 19.04 0
 21 3 -4 286.34 19.34 0
 21 3 -4 238.08 19.11 0
 -21 3 4 275.24 23.87 0
 21 -3 -4 234.28 19.74 0
 -21 -3 4 261.09 14.66 0
 -21 3 4 286.96 20.51 0
 -21 -3 4 293.83 19.64 0
 21 -3 -4 246.15 23.65 0
 19 -3 -4 34.84 19.03 0
 -19 3 4 16.64 19.88 0
 -19 -3 4 40.18 18.85 0
 19 3 -4 26.42 18.78 0
 19 3 -4 53.93 18.44 0
 -19 -3 4 29.07 13.23 0
 19 -3 -4 28.02 19.28 0
 -19 3 4 39.24 20.07 0
 17 -3 -4 262.44 21.99 0
 -17 3 4 285.7 23.35 0
 -17 -3 4 271.96 20.1 0
 -17 3 4 265.97 21.92 0
 -17 -3 4 302.63 20.98 0
 17 -3 -4 227.01 22.01 0
 17 3 -4 255.72 19.73 0
 17 3 -4 284.58 20.14 0
 15 3 -4 130.66 21.34 0
 15 -3 -4 145.35 27.43 0
 15 3 -4 137.33 21.05 0
 -15 -3 4 143.42 21.52 0
 15 -3 -4 122.44 27.97 0
 -15 3 4 131.4 27.38 0
 -15 3 4 163.73 28.95 0
 -15 -3 4 133.91 21.23 0
 13 3 -4 160.73 17.44 0
 13 -3 -4 158.28 29.27 0
 -13 3 4 157.75 30.26 0
 -13 -3 4 133.68 17.48 0
 -13 3 4 147.91 29.84 0
 13 -3 -4 140.62 30.42 0
 -13 -3 4 136.38 24.06 0
 13 3 -4 148.75 24.38 0
 -11 3 4 932.58 37.52 0
 11 3 -4 995.21 23.71 0
 -11 3 4 1127.71 44.2 0
 -11 -3 4 1001.95 31.22 0
 11 -3 -4 993.61 38.39 0
 11 -3 -4 889.53 38.64 0
 11 3 -4 1014.95 30.68 0
 -11 -3 4 1049.08 30.8 0
 9 -3 -4 1030.03 44.7 0
 -9 3 4 967.75 42.38 0
 9 3 -4 1045.16 31.71 0
 -9 -3 4 1017.25 24.91 0
 -9 3 4 1149.44 49.53 0
 9 -3 -4 887.93 43.86 0
 9 3 -4 1104.03 31.5 0
 -9 -3 4 1070 25.22 0
 -7 3 4 4 38.4 0
 7 -3 -4 6.42 38.56 0
 7 3 -4 6.87 24.84 0
 -7 3 4 5.62 33.35 0
 7 -3 -4 -1.1 37.61 0
 7 3 -4 8.68 25.54 0
 -7 -3 4 6.02 25.55 0
 -7 -3 4 5.16 25.63 0
 5 -3 -4 -0.97 33.16 0
 5 3 -4 -0.27 25.87 0
 -5 3 4 1.39 32.09 0
 -5 -3 4 6.31 25.38 0
 5 3 -4 -7.43 24.97 0
 -5 -3 4 6.83 25.18 0
 5 -3 -4 2.82 37.43 0
 -5 3 4 5.04 34.74 0
 -3 -3 4 827.12 30.01 0
 3 -3 -4 724.55 36.67 0
 3 3 -4 806.27 29.78 0
 3 3 -4 811.83 30.14 0
 -3 -3 4 809.94 30.27 0
 -3 3 4 736.88 36.7 0
 -3 3 4 744.7 40.07 0
 3 -3 -4 741.79 39.22 0
 -1 3 4 2232.76 49.66 0
 1 -3 -4 2070.65 47.46 0
 1 3 -4 2279.01 38.22 0
 1 -3 -4 2223.1 47.2 0
 -1 3 4 2079.07 42.07 0
 -1 -3 4 2236.57 38.01 0
 1 3 -4 2192.33 36.99 0
 -1 -3 4 2303.76 37.35 0
 -1 3 -4 4353.88 47 0
 1 -3 4 4225.94 46.46 0
 1 -3 4 4475.94 47.48 0
 -1 -3 -4 3974.95 54.66 0
 -1 3 -4 4115.82 45.34 0
 1 3 4 3757.16 51.95 0
 -1 -3 -4 4204.41 51.52 0
 1 3 4 4143.86 53.36 0
 3 -3 4 29.1 30.06 0
 -3 -3 -4 31.53 26.68 0
 3 -3 4 28.18 23.91 0
 -3 3 -4 33.52 23.83 0
 -3 -3 -4 38.98 26.66 0
 3 3 4 37.47 25.71 0
 3 3 4 38.89 33.44 0
 -3 3 -4 37.72 24.46 0
 5 3 4 28.23 27.66 0
 5 -3 4 26.56 30.1 0
 5 3 4 36.49 26.24 0
 5 -3 4 20.14 25.41 0
 -5 3 -4 24.24 25.63 0
 -5 -3 -4 12.7 27.1 0
 -5 3 -4 20.42 24.68 0
 -5 -3 -4 18.12 27.35 0
 -7 3 -4 6.7 23.33 0
 7 -3 4 9.8 23.66 0
 -7 -3 -4 2.3 17.79 0
 -7 3 -4 12.66 24.52 0
 7 3 4 19.37 26.32 0
 7 -3 4 14.82 29.62 0
 -7 -3 -4 5.21 25.65 0
 7 3 4 17.66 25.64 0
 9 3 4 218.83 17.32 0
 -9 -3 -4 229.82 24 0
 -9 3 -4 226.38 23.55 0
 9 -3 4 216.41 22.88 0
 9 3 4 244.86 24.9 0
 9 -3 4 247.51 27.81 0
 -9 3 -4 230.54 22.23 0
 -9 -3 -4 266.06 24.4 0
 -11 3 -4 3608.6 37.55 0
 11 -3 4 3990.25 39.08 0
 11 3 4 3953.48 36.75 0
 -11 -3 -4 4073.6 37.17 0
 11 -3 4 3480.68 37.99 0
 -11 -3 -4 3687.12 35.69 0
 -11 3 -4 3951.36 40.24 0
 11 3 4 3459.79 34.58 0
 13 -3 4 142.69 18.99 0
 -13 -3 -4 148.2 20.49 0
 13 -3 4 141.76 19.8 0
 -13 -3 -4 146.8 15.28 0
 -13 3 -4 143.59 19.52 0
 13 3 4 123.97 20.13 0
 -13 3 -4 144.6 20.44 0
 13 3 4 147.28 20.9 0
 -15 -3 -4 20.1 19.05 0
 -15 3 -4 5.72 17.35 0
 15 -3 4 14.59 16.88 0
 -15 -3 -4 7.68 18.51 0
 -15 3 -4 -5.51 17.24 0
 15 -3 4 25.12 17.29 0
 15 3 4 -0.57 18.58 0
 15 3 4 4.08 12.6 0
 -17 -3 -4 388.34 20.96 0
 17 3 4 395.05 20.95 0
 17 3 4 329.05 19.99 0
 -17 3 -4 351.33 18.78 0
 17 -3 4 324.25 18.74 0
 -17 3 -4 352.44 19.5 0
 17 -3 4 394.3 19.72 0
 -17 -3 -4 341.08 20.3 0
 19 3 4 166.28 18.27 0
 -19 -3 -4 193.01 18.78 0
 -19 3 -4 168.49 18.25 0
 -19 3 -4 167.1 19.77 0
 19 3 4 169.74 13.73 0
 19 -3 4 151.34 19.32 0
 -19 -3 -4 154.5 18.35 0
 19 -3 4 164.87 18.7 0
 21 -3 4 27.37 18.28 0
 21 -3 4 3.7 17.86 0
 21 3 4 25.67 17.25 0
 -21 -3 -4 11.1 16.64 0
 -21 -3 -4 19.53 17.17 0
 -21 3 -4 20.96 18.86 0
 -21 3 -4 17.23 17.56 0
 21 3 4 18.01 16.62 0
 23 -3 4 94.96 17.92 0
 -23 3 -4 108.11 17.14 0
 23 -3 4 86.24 17.76 0
 23 3 4 91.38 18.02 0
 -23 -3 -4 87.3 12.6 0
 -23 -3 -4 108.08 17.27 0
 -23 3 -4 123.93 18.2 0
 23 3 4 112.93 16.63 0
 -25 -3 -4 61.07 17.49 0
 -25 3 -4 39.77 17.24 0
 25 -3 4 30.26 16.17 0
 25 -3 4 41.43 12.1 0
 -25 -3 -4 54.68 16.17 0
 25 3 4 50.54 17.31 0
 -25 3 -4 59.3 16.6 0
 25 3 4 39.31 11.96 0
 -27 -3 -4 66.49 14.51 0
 27 -3 4 51.71 15.94 0
 -27 -3 -4 60.07 15.36 0
 27 3 4 42.04 14.72 0
 -27 3 -4 67.83 17.74 0
 -27 3 -4 42.16 15.83 0
 27 3 4 66.78 16.32 0
 27 -3 4 59.29 15.44 0
 29 3 4 13.32 15.46 0
 -29 3 -4 26.42 15.81 0
 29 3 4 6.22 10.81 0
 -29 -3 -4 4.66 16.29 0
 29 -3 4 7.1 15.6 0
 29 -3 4 8.57 15.95 0
 -29 -3 -4 3.94 15.37 0
 -29 3 -4 -0.66 16.39 0
 31 3 4 100.97 15.41 0
 31 3 4 87.93 10.62 0
 -31 -3 -4 82.33 15.37 0
 -31 3 -4 95.19 14.89 0
 -31 -3 -4 122.02 15.72 0
 31 -3 4 108.33 16.32 0
 -31 3 -4 91.86 16.24 0
 31 -3 4 84.75 15.24 0
 -33 3 -4 142.72 15.24 0
 33 -3 4 154.01 15.21 0
 -33 -3 -4 132.34 15.73 0
 33 3 4 143.35 11.29 0
 -33 3 -4 170.8 15.04 0
 33 3 4 116.75 15.45 0
 -33 -3 -4 151.32 11.98 0
 33 -3 4 123.94 16.43 0
 -36 -4 4 41.16 15.25 0
 36 -4 -4 28.23 14.49 0
 36 4 -4 30.12 15.27 0
 -36 -4 4 -0.24 10.68 0
 36 4 -4 24.84 14.69 0
 -36 4 4 31.36 18.07 0
 36 -4 -4 27.05 15.11 0
 -36 4 4 14.83 16.59 0
 34 4 -4 33.43 10.94 0
 34 -4 -4 34.95 15.7 0
 -34 -4 4 28.07 10.46 0
 -34 4 4 31.18 14.78 0
 -34 4 4 50.17 16.49 0
 34 -4 -4 33.63 15.69 0
 34 4 -4 38.06 15.03 0
 -34 -4 4 39.47 15.42 0
 -32 4 4 22.52 15.61 0
 32 -4 -4 23.55 15.68 0
 -32 -4 4 23.87 11.67 0
 -32 4 4 -1.79 16.21 0
 32 -4 -4 30.59 15.89 0
 32 4 -4 41.78 15.44 0
 32 4 -4 1.86 16.01 0
 -32 -4 4 7.75 15.95 0
 -30 4 4 74.38 20.81 0
 -30 -4 4 110.05 15.97 0
 -30 4 4 83.29 21.42 0
 30 -4 -4 92.18 19.87 0
 30 4 -4 90.35 15.28 0
 -30 -4 4 92.92 15.94 0
 30 4 -4 78.1 15.42 0
 30 -4 -4 70.61 16.72 0
 -28 4 4 65.91 20.49 0
 -28 -4 4 74.6 17.29 0
 28 4 -4 72.96 16.83 0
 -28 4 4 68.03 17.85 0
 28 -4 -4 61.16 16.75 0
 -28 -4 4 76.38 16.52 0
 28 -4 -4 62.93 17.88 0
 28 4 -4 59.6 16.84 0
 -26 -4 4 73.68 17.77 0
 -26 4 4 67.68 17.32 0
 -26 4 4 81.65 17.14 0
 26 4 -4 73.02 16.78 0
 26 -4 -4 63.67 17.54 0
 -26 -4 4 62.11 12.77 0
 26 4 -4 41.51 16.84 0
 26 -4 -4 47.8 20.8 0
 24 4 -4 299.5 18.05 0
 24 4 -4 262.13 17.71 0
 24 -4 -4 244.93 18.91 0
 -24 4 4 336.56 24.23 0
 -24 4 4 269.12 18.8 0
 -24 -4 4 324.04 18.01 0
 -24 -4 4 261.08 18.13 0
 24 -4 -4 287.42 19.7 0
 22 -4 -4 148.29 19.47 0
 -22 4 4 168.72 20.88 0
 -22 4 4 152.19 24.25 0
 22 -4 -4 117.85 19.43 0
 22 4 -4 139.3 17.89 0
 22 4 -4 153.68 17.96 0
 -22 -4 4 176.76 19.07 0
 -22 -4 4 138.29 18.14 0
 -20 4 4 569.87 23.76 0
 20 4 -4 480.89 16.01 0
 -20 -4 4 518.74 20.58 0
 20 -4 -4 513.09 22.21 0
 -20 -4 4 580.49 21.4 0
 20 -4 -4 425.51 22.22 0
 -20 4 4 498.56 22.31 0
 20 4 -4 536.49 20.98 0
 18 4 -4 -0.85 12.77 0
 -18 4 4 12.04 18.97 0
 18 4 -4 -8.03 17.82 0
 -18 -4 4 0.85 18.31 0
 18 -4 -4 3.77 18.68 0
 -18 -4 4 -1.29 18.4 0
 -18 4 4 4.72 24.75 0
 18 -4 -4 5.25 23.76 0
 16 -4 -4 95.3 25.34 0
 -16 4 4 96.41 25.82 0
 -16 -4 4 90.2 19.23 0
 -16 4 4 110.78 26.95 0
 -16 -4 4 111.42 19.34 0
 16 4 -4 115.78 19.74 0
 16 4 -4 94.42 19.33 0
 16 -4 -4 87.12 25.88 0
 -14 -4 4 19.14 13.4 0
 -14 4 4 16.98 31.55 0
 14 -4 -4 19.14 25.19 0
 14 4 -4 5.19 19.11 0
 14 4 -4 14.36 19.16 0
 -14 -4 4 25.81 19.8 0
 -14 4 4 21.48 28.79 0
 14 -4 -4 13.96 29.85 0
 -12 4 4 1659.89 45.55 0
 -12 -4 4 1656.4 24.12 0
 12 4 -4 1842.13 28.74 0
 12 -4 -4 1702.63 45.39 0
 12 4 -4 1705.84 28.74 0
 12 -4 -4 1445.21 43.48 0
 -12 -4 4 1788.85 28.64 0
 -12 4 4 1897.96 49.12 0
 -10 4 4 717.18 47.52 0
 -10 4 4 870.68 50.98 0
 10 -4 -4 785.63 48.16 0
 -10 -4 4 780.3 25.43 0
 10 4 -4 763.48 25.95 0
 -10 -4 4 834.19 26.2 0
 10 -4 -4 655.35 52.68 0
 10 4 -4 809.33 25.07 0
 -8 -4 4 1014.58 28.11 0
 8 4 -4 879.11 28.62 0
 8 4 -4 962.35 27.96 0
 6 4 -4 118.52 24.9 0
 6 4 -4 111.45 24.08 0
 -6 -4 4 116.1 24.94 0
 -6 -4 4 109.16 24.71 0
 -4 -4 4 17.23 25.02 0
 4 -4 -4 17.54 40.65 0
 4 -4 -4 18.39 44.82 0
 4 4 -4 30.15 25.31 0
 -4 4 4 21.25 42.45 0
 -4 -4 4 30.13 24.46 0
 4 4 -4 15.74 24.14 0
 -4 4 4 21.11 44.47 0
 2 4 -4 92.29 24.25 0
 2 -4 -4 91.89 39.1 0
 -2 -4 4 97.65 24.13 0
 2 4 -4 90.63 24.67 0
 -2 4 4 92.84 34.24 0
 2 -4 -4 95 32.45 0
 -2 -4 4 99.32 25.13 0
 -2 4 4 95.95 31.54 0
 0 -4 -4 41.11 30.68 0
 0 4 -4 31.64 23.11 0
 0 -4 4 39.71 23.76 0
 0 -4 4 42.08 23.45 0
 0 -4 -4 37.74 25.28 0
 0 4 -4 40.31 24 0
 0 4 4 35.2 29.07 0
 0 4 4 26.65 25.53 0
 -2 4 -4 125.13 27.62 0
 2 -4 4 113.64 23.41 0
 -2 -4 -4 143.72 32.44 0
 2 -4 4 155.39 29.48 0
 -2 -4 -4 127.41 26.13 0
 -2 4 -4 115.42 24.29 0
 2 4 4 121.34 26.74 0
 2 4 4 126.58 25.55 0
 -4 -4 -4 1179.46 31.13 0
 -4 4 -4 1097.36 29.14 0
 4 -4 4 1103.03 33.31 0
 4 4 4 1060.66 30.69 0
 -4 -4 -4 1036.25 29.68 0
 -4 4 -4 1096.75 29.03 0
 4 4 4 1031.67 29.12 0
 4 -4 4 1200.91 29.79 0
 6 -4 4 17.62 21.23 0
 6 4 4 8.2 22.18 0
 -6 4 -4 7.83 21.03 0
 -6 -4 -4 21.29 22.82 0
 -6 4 -4 20.29 23.13 0
 -6 -4 -4 10.53 22.59 0
 6 -4 4 18.75 22.92 0
 6 4 4 23.61 22.68 0
 8 -4 4 164.62 21.04 0
 8 -4 4 179.57 22.13 0
 -8 4 -4 189.62 22.85 0
 -8 -4 -4 204.48 23.45 0
 -8 -4 -4 159.44 22.61 0
 8 4 4 174.72 22.85 0
 8 4 4 178.96 23.04 0
 -8 4 -4 174.07 20.18 0
 -10 -4 -4 16.33 20.21 0
 -10 4 -4 6.64 24.04 0
 10 -4 4 19.97 20.46 0
 -10 -4 -4 14.66 20.66 0
 -10 4 -4 20.73 20.87 0
 10 4 4 10.74 20.09 0
 10 -4 4 14.9 19.31 0
 10 4 4 30.42 20.14 0
 12 4 4 473.27 21.48 0
 12 4 4 401.91 17.06 0
 12 -4 4 484.52 23.04 0
 -12 4 -4 476.66 23.06 0
 -12 4 -4 437.05 21.88 0
 -12 -4 -4 434.06 21.48 0
 12 -4 4 396.4 21.29 0
 -12 -4 -4 457.65 21.71 0
 14 -4 4 38.9 21.87 0
 -14 4 -4 35.09 23.17 0
 -14 -4 -4 45.67 19.31 0
 14 4 4 37.42 19.16 0
 -14 4 -4 40.2 22.51 0
 14 -4 4 30.14 18.72 0
 -14 -4 -4 32.67 18.99 0
 14 4 4 40.17 19.65 0
 16 -4 4 153.83 18.11 0
 -16 4 -4 172.14 18.54 0
 -16 -4 -4 176.51 19.24 0
 16 4 4 179.19 19.45 0
 16 -4 4 174.18 18.58 0
 16 4 4 152.53 19.1 0
 -16 -4 -4 150.89 14.08 0
 -16 4 -4 194.54 18.82 0
 18 -4 4 107.13 21.91 0
 18 -4 4 135.11 18.46 0
 -18 -4 -4 111.2 18.94 0
 18 4 4 108.26 18.13 0
 -18 4 -4 99.35 17.96 0
 -18 4 -4 120.03 18.85 0
 18 4 4 105.6 18.7 0
 -18 -4 -4 91.9 17.66 0
 -20 -4 -4 609.95 20.11 0
 -20 -4 -4 712.99 20.6 0
 20 -4 4 630.59 24.02 0
 -20 4 -4 720.19 21.98 0
 20 -4 4 632.7 21.02 0
 -20 4 -4 634.56 20.35 0
 20 4 4 610.75 18.74 0
 20 4 4 679.59 16.44 0
 -22 4 -4 569.77 20.7 0
 22 4 4 472.58 19.32 0
 -22 -4 -4 556.3 15.65 0
 -22 -4 -4 472.9 18.72 0
 -22 4 -4 513.58 22.88 0
 22 -4 4 502.76 19.14 0
 22 -4 4 457.2 19.66 0
 22 4 4 497.43 19.61 0
 -24 4 -4 184.23 17.24 0
 -24 -4 -4 168.28 16.61 0
 24 -4 4 172.19 17.49 0
 -24 4 -4 210.96 21.48 0
 -24 -4 -4 235.38 17.86 0
 24 4 4 183.06 17.46 0
 24 4 4 186.83 16.95 0
 24 -4 4 201.79 17.44 0
 26 4 4 77 16.28 0
 -26 -4 -4 73.94 16.65 0
 -26 4 -4 73.88 14.54 0
 -26 4 -4 97.24 16.55 0
 26 -4 4 76.04 16.44 0
 26 4 4 98.26 16.57 0
 26 -4 4 80.25 15.24 0
 -26 -4 -4 69.44 10.66 0
 -28 4 -4 54.5 15.47 0
 28 -4 4 59.75 15.47 0
 -28 -4 -4 55.17 16.09 0
 -28 -4 -4 41.54 16.24 0
 -28 4 -4 74.74 16.74 0
 28 4 4 41.36 11.43 0
 28 4 4 45.56 15.83 0
 28 -4 4 40.16 15.88 0
 30 4 4 10.1 14.97 0
 -30 -4 -4 24.14 15.19 0
 -30 -4 -4 22.72 15.14 0
 -30 4 -4 32.39 16.29 0
 -30 4 -4 5.45 15.7 0
 30 -4 4 16.88 15.66 0
 30 4 4 21.61 14.57 0
 30 -4 4 9.11 15.29 0
 -32 4 -4 93.76 14.78 0
 -32 -4 -4 90.5 11.21 0
 -32 -4 -4 87.01 11.06 0
 32 -4 4 97.32 15.65 0
 32 4 4 92.42 15.03 0
 32 4 4 98.73 15.35 0
 -32 4 -4 111.71 16.65 0
 32 -4 4 95.04 16.17 0
 -35 5 4 -3.02 16.38 0
 -35 -5 4 -10.37 15.52 0
 -35 -5 4 16.03 10.84 0
 35 -5 -4 10.81 15.79 0
 35 5 -4 -7.12 15.2 0
 -35 5 4 -5.3 14.86 0
 35 5 -4 -5.22 15.07 0
 35 -5 -4 -5.12 18.89 0
 -33 -5 4 109.25 15.67 0
 33 -5 -4 118.22 17.32 0
 -33 5 4 138.41 18.16 0
 -33 5 4 122.22 17.25 0
 -33 -5 4 142.86 15.75 0
 33 -5 -4 106.24 17.31 0
 33 5 -4 121.88 11.47 0
 33 5 -4 128.02 15.26 0
 31 5 -4 37.62 15.49 0
 -31 5 4 45.78 16.64 0
 -31 -5 4 32.55 16.05 0
 31 -5 -4 37.3 16.43 0
 31 5 -4 44.02 11.05 0
 -31 -5 4 37.56 15.81 0
 31 -5 -4 41.19 15.33 0
 -31 5 4 31.87 15.12 0
 29 5 -4 -0.84 15.45 0
 29 -5 -4 -1.13 19.38 0
 -29 -5 4 -12.28 14.53 0
 29 -5 -4 0.23 16.45 0
 -29 5 4 24.65 16.68 0
 -29 5 4 1.73 15.8 0
 29 5 -4 2.89 14.97 0
 -29 -5 4 -6.59 10.52 0
 -27 -5 4 107.12 17.2 0
 -27 5 4 96.42 21.09 0
 27 5 -4 103.25 16.74 0
 -27 5 4 114.35 22.89 0
 27 -5 -4 92.95 17.08 0
 27 -5 -4 101.06 21.34 0
 -27 -5 4 94.93 12.19 0
 27 5 -4 91.9 16.79 0
 -25 -5 4 189.1 18 0
 25 5 -4 170.32 17.11 0
 -25 5 4 152.86 19.28 0
 25 -5 -4 137.64 22.38 0
 25 -5 -4 159.23 18.5 0
 -25 -5 4 152.27 18.23 0
 25 5 -4 164.33 17.87 0
 -25 5 4 175.02 24.45 0
 -23 -5 4 79.33 17.86 0
 -23 5 4 68.21 21.7 0
 -23 5 4 80.69 25.24 0
 23 -5 -4 67.75 23.94 0
 23 -5 -4 60.29 18.23 0
 23 5 -4 58 12.65 0
 23 5 -4 67.94 16.15 0
 -23 -5 4 62.04 16.61 0
 21 5 -4 357.62 14.21 0
 -21 5 4 441.63 28.42 0
 21 -5 -4 377.7 26.09 0
 -21 -5 4 390.67 18.7 0
 21 5 -4 393.74 18.72 0
 -21 5 4 382.72 26.31 0
 -21 -5 4 411.26 19.1 0
 21 -5 -4 332.38 26.37 0
 -19 5 4 31.24 23.71 0
 19 5 -4 35.44 17.59 0
 19 -5 -4 25.31 22.74 0
 19 -5 -4 32.66 22.2 0
 -19 5 4 35.59 21.96 0
 19 5 -4 31.05 17.78 0
 -19 -5 4 43.91 12.78 0
 -19 -5 4 22.25 12.58 0
 17 5 -4 29.91 18.54 0
 -17 -5 4 25.43 18.66 0
 -17 5 4 7.22 24.84 0
 17 -5 -4 11.88 23.18 0
 -17 5 4 7.42 26.78 0
 17 -5 -4 5.45 23.59 0
 17 5 -4 23.96 18.38 0
 -17 -5 4 16.84 18.96 0
 -15 -5 4 99.94 13.16 0
 -15 5 4 122.37 31.73 0
 -15 -5 4 110.04 18.7 0
 15 5 -4 97.51 18.73 0
 15 5 -4 77.53 18.87 0
 15 -5 -4 92.61 28.15 0
 15 -5 -4 85.96 29.39 0
 -13 -5 4 30.38 20.17 0
 13 -5 -4 20.32 35.54 0
 -13 5 4 22.74 34.51 0
 -13 -5 4 28.67 17.96 0
 13 5 -4 21.63 18.55 0
 -13 5 4 29.65 33.59 0
 13 -5 -4 27.55 32.42 0
 13 5 -4 31.76 18.58 0
 -11 -5 4 3.86 19.61 0
 -11 -5 4 -2.31 18.56 0
 11 5 -4 12.64 19.27 0
 11 5 -4 5.33 18.75 0
 9 5 -4 38.5 20.64 0
 9 5 -4 48.73 19.76 0
 -9 -5 4 31.42 19.54 0
 7 5 -4 24.42 20.72 0
 -7 -5 4 36.67 20.49 0
 -7 -5 4 26.59 19.79 0
 7 5 -4 29.16 20.47 0
 5 5 -4 122.18 22.41 0
 5 5 -4 120.19 21.18 0
 -5 -5 4 129.59 21.45 0
 -5 -5 4 128.92 22.19 0
 3 5 -4 264.66 24.19 0
 -3 -5 4 275.09 22.25 0
 3 5 -4 286.31 22.02 0
 -3 -5 4 314.63 24.21 0
 3 -5 -4 271.07 36.13 0
 -3 5 4 282.77 39.31 0
 3 -5 -4 276.05 38.35 0
 -3 5 4 286.68 36.85 0
 1 5 -4 595.57 24.41 0
 1 -5 -4 549.99 37.3 0
 1 -5 -4 621.72 33.75 0
 -1 5 4 607.63 32.48 0
 1 5 -4 580.28 26.01 0
 -1 5 4 612.02 33.84 0
 -1 -5 4 652.67 26.18 0
 -1 -5 4 632.49 24.96 0
 -1 5 -4 1302.03 29.22 0
 1 5 4 1323.93 36.08 0
 -1 5 -4 1260.64 28.47 0
 1 -5 4 1371.78 33.47 0
 1 -5 4 1340.45 29.44 0
 1 5 4 1334.12 37.68 0
 -1 -5 -4 1234.08 36.2 0
 -1 -5 -4 1378.15 33.9 0
 -3 5 -4 70.97 24.53 0
 3 -5 4 78.11 25.31 0
 -3 5 -4 68.3 20.96 0
 3 -5 4 79.98 25.01 0
 -3 -5 -4 81.36 22.64 0
 -3 -5 -4 64.3 26.77 0
 3 5 4 71.89 27.69 0
 3 5 4 72.16 21.96 0
 5 -5 4 1400.21 29.1 0
 5 5 4 1508.58 30.86 0
 -5 -5 -4 1542.63 30.67 0
 -5 5 -4 1499.11 32.57 0
 -5 5 -4 1516.41 29.76 0
 -5 -5 -4 1325.11 29.13 0
 5 -5 4 1614.08 33.87 0
 5 5 4 1376.14 29.62 0
 -7 -5 -4 159.54 21.59 0
 7 -5 4 142.53 23.35 0
 -7 -5 -4 126.56 20.71 0
 7 5 4 144.86 20.86 0
 7 5 4 160.26 21.12 0
 -7 5 -4 138.63 19.65 0
 7 -5 4 142.75 20.85 0
 -7 5 -4 154.1 24.52 0
 9 5 4 296.83 20.39 0
 9 -5 4 292.79 25.55 0
 -9 5 -4 325.05 26.38 0
 -9 -5 -4 260.11 20.34 0
 -9 5 -4 284.34 21.31 0
 9 5 4 318.75 20.7 0
 -9 -5 -4 316.74 21.03 0
 9 -5 4 307.94 22.37 0
 -11 5 -4 85.95 18.56 0
 -11 -5 -4 111.27 18.23 0
 11 5 4 89.91 18.53 0
 11 -5 4 87.88 22.16 0
 11 -5 4 100.52 23.47 0
 11 5 4 88.66 17.97 0
 -11 -5 -4 80.64 16.97 0
 -11 5 -4 101.87 24.04 0
 13 -5 4 40.89 17.98 0
 13 5 4 60.52 18.98 0
 13 -5 4 55.58 19.04 0
 -13 -5 -4 48.46 18.54 0
 -13 5 -4 48.05 21.95 0
 -13 -5 -4 52.91 17.73 0
 -13 5 -4 45.53 19.29 0
 13 5 4 55.94 18.23 0
 15 -5 4 2.07 21.76 0
 15 5 4 4.36 12.64 0
 15 5 4 5.35 18.45 0
 -15 5 -4 7.11 22.93 0
 -15 -5 -4 19.13 18.23 0
 -15 5 -4 17.37 21.75 0
 15 -5 4 9.56 18.92 0
 -15 -5 -4 -4.75 17.54 0
 17 -5 4 12.4 17.09 0
 17 -5 4 22.03 17.46 0
 -17 5 -4 17 17.47 0
 -17 -5 -4 23.04 17.92 0
 -17 -5 -4 10.61 18.15 0
 17 5 4 16.3 17.4 0
 17 5 4 24.9 17.7 0
 -17 5 -4 24.73 17.86 0
 19 5 4 51.48 16.45 0
 19 -5 4 50.7 17.35 0
 19 -5 4 43.87 16.57 0
 -19 -5 -4 48.7 16.81 0
 -19 -5 -4 34.52 16.17 0
 -19 5 -4 45.58 16.56 0
 19 5 4 40.92 16.67 0
 -19 5 -4 29.85 16.6 0
 21 -5 4 41.42 19.96 0
 21 -5 4 48.16 20.15 0
 -21 -5 -4 35.25 16.02 0
 21 5 4 27.52 16.41 0
 -21 -5 -4 49.07 17.35 0
 -21 5 -4 42.73 20.26 0
 21 5 4 44.6 15.55 0
 -21 5 -4 31.33 20.6 0
 23 -5 4 -1.1 15.97 0
 23 5 4 1.89 16.23 0
 -23 -5 -4 10.63 11.56 0
 -23 5 -4 7.94 19.04 0
 23 -5 4 1.58 16.67 0
 23 5 4 3.35 15.69 0
 -23 -5 -4 1.07 15.37 0
 -23 5 -4 10.62 16.98 0
 -25 5 -4 27.23 15.19 0
 -25 -5 -4 18.99 15.44 0
 25 5 4 33.57 15.93 0
 25 5 4 23.71 15.09 0
 -25 -5 -4 28.26 15.27 0
 -25 5 -4 13 15.86 0
 25 -5 4 23.16 15.42 0
 25 -5 4 38.88 15.47 0
 -27 -5 -4 22.91 11.14 0
 27 5 4 -2.69 15.55 0
 27 5 4 21.86 14.95 0
 -27 5 -4 5.63 14.76 0
 -27 5 -4 20.95 16.16 0
 27 -5 4 18.18 15.13 0
 -27 -5 -4 16.16 11.25 0
 27 -5 4 17.87 15.9 0
 -29 5 -4 69.52 14.39 0
 -29 -5 -4 74.36 14.55 0
 29 5 4 60.78 15.11 0
 -29 -5 -4 68.09 15.39 0
 29 5 4 55.49 14.94 0
 29 -5 4 55.94 15.77 0
 29 -5 4 64.89 16 0
 -29 5 -4 69.36 15.85 0
 -31 -5 -4 11.32 15.16 0
 31 5 4 12.14 14.63 0
 -31 -5 -4 -3.07 14.62 0
 -31 5 -4 -7.79 13.36 0
 -31 5 -4 -12.17 14.55 0
 31 5 4 25.03 14.72 0
 31 -5 4 12.45 14.39 0
 31 -5 4 -19.54 14.35 0
 34 -6 -4 20.55 15.77 0
 -34 -6 4 40.52 15.35 0
 -34 6 4 21.29 18.43 0
 -34 6 4 34.95 17.27 0
 34 6 -4 40.04 14.94 0
 -34 -6 4 18.73 14.69 0
 34 6 -4 24.21 10.81 0
 34 -6 -4 27.03 20.04 0
 32 6 -4 -8.34 14.4 0
 32 6 -4 0.73 14.32 0
 -32 6 4 0.53 18.24 0
 -32 -6 4 14.29 15.26 0
 32 -6 -4 -3.12 16.37 0
 32 -6 -4 -7.11 16.06 0
 -32 -6 4 -8.75 14.39 0
 -32 6 4 3.17 16.73 0
 -30 6 4 12.59 16.23 0
 30 6 -4 5.37 10.93 0
 30 6 -4 10.83 15.26 0
 30 -6 -4 21.97 20.21 0
 -30 6 4 13.5 17.41 0
 -30 -6 4 6.49 15.5 0
 -30 -6 4 17.91 15.36 0
 30 -6 -4 9 17.35 0
 -28 6 4 190.13 17.46 0
 -28 -6 4 239.59 15.99 0
 28 6 -4 215.15 12.15 0
 28 6 -4 213.05 16.17 0
 28 -6 -4 224.44 22.38 0
 -28 6 4 257.87 23.22 0
 28 -6 -4 211.87 21.94 0
 -28 -6 4 235.47 12.12 0
 -26 -6 4 84.79 16.58 0
 26 6 -4 94.6 16.06 0
 -26 6 4 84.35 19.97 0
 26 -6 -4 81.22 20.77 0
 26 6 -4 89.37 16.18 0
 -26 6 4 84.61 21.92 0
 26 -6 -4 75.54 21.23 0
 -26 -6 4 84.96 15.46 0
 24 -6 -4 38.2 21.91 0
 24 -6 -4 44.52 21.3 0
 24 6 -4 44.94 12.27 0
 -24 -6 4 47.36 16.08 0
 -24 -6 4 30.42 10.8 0
 -24 6 4 40.72 21.99 0
 24 6 -4 31.22 16.24 0
 -24 6 4 48.19 22.83 0
 22 6 -4 26.24 15.81 0
 22 -6 -4 11.76 22.29 0
 22 -6 -4 11.99 22.34 0
 22 6 -4 4.79 16.16 0
 -22 6 4 0.69 25.34 0
 -22 -6 4 6.97 16.51 0
 -22 -6 4 6.38 11.16 0
 -22 6 4 13.11 23.25 0
 20 -6 -4 104.21 27.75 0
 20 -6 -4 131.98 26.72 0
 -20 6 4 140.96 27.45 0
 -20 6 4 116.97 27.15 0
 -20 -6 4 118.89 17.4 0
 20 6 -4 129.87 16.65 0
 20 6 -4 126.45 12.63 0
 -20 -6 4 143.29 17.65 0
 18 -6 -4 92.8 29.98 0
 -18 6 4 112.62 28.3 0
 18 6 -4 92.39 12.85 0
 18 6 -4 102.59 18.19 0
 -18 -6 4 107.69 17.61 0
 -18 -6 4 114.22 18.16 0
 18 -6 -4 102.38 29.12 0
 -16 -6 4 289.14 18.86 0
 16 -6 -4 237.1 40.66 0
 16 6 -4 305.38 18.95 0
 16 6 -4 262.1 19.19 0
 -16 -6 4 318.95 19.53 0
 16 -6 -4 303.94 40.3 0
 -16 6 4 329.05 39.91 0
 -16 6 4 267.27 40.7 0
 -14 -6 4 451.95 20.48 0
 14 6 -4 413.66 15.16 0
 -14 -6 4 406.27 19.19 0
 14 6 -4 400.61 19.55 0
 12 6 -4 144.89 17.64 0
 -12 -6 4 140.73 17.32 0
 12 6 -4 153.61 17.2 0
 -12 -6 4 163.13 17.9 0
 10 6 -4 171.97 17.55 0
 -10 -6 4 184.22 17.22 0
 10 6 -4 175.27 19.01 0
 -10 -6 4 189.24 18.42 0
 -8 -6 4 110.83 18.98 0
 8 6 -4 107.07 17.76 0
 -8 -6 4 98.15 17.46 0
 8 6 -4 103.53 17.12 0
 6 6 -4 530.48 21.54 0
 -6 -6 4 504.83 21.23 0
 -6 -6 4 542.9 22.34 0
 6 6 -4 546.41 22.79 0
 4 6 -4 743.51 25.24 0
 -4 -6 4 791.45 25.14 0
 4 6 -4 753.93 23.1 0
 -4 -6 4 743.48 23.86 0
 -2 -6 4 58.41 18.08 0
 2 6 -4 57.81 19.83 0
 2 6 -4 58.78 18.19 0
 2 -6 -4 53.02 28.83 0
 -2 6 4 59.38 28.68 0
 -2 -6 4 55.61 19.72 0
 2 -6 -4 48.1 29.07 0
 -2 6 4 59.59 27.81 0
 0 -6 4 166.22 25.09 0
 0 6 -4 150.11 21.11 0
 0 6 -4 145.26 18.83 0
 0 -6 -4 148.76 26.46 0
 0 6 4 150.28 26.08 0
 0 6 4 151.09 25.95 0
 0 -6 -4 154.32 26.46 0
 0 -6 4 159.33 23.62 0
 2 6 4 -6.46 24.46 0
 -2 6 -4 3.78 19.12 0
 2 6 4 0.39 24.67 0
 2 -6 4 -2.21 18.75 0
 2 -6 4 14.09 23.32 0
 -2 -6 -4 9.36 24.77 0
 -2 6 -4 12.81 22.34 0
 -2 -6 -4 12.43 20.65 0
 -4 -6 -4 232.65 22.23 0
 4 6 4 235.58 22.86 0
 -4 6 -4 232.55 24.14 0
 -4 -6 -4 252.25 26.55 0
 4 -6 4 222.8 24.07 0
 4 -6 4 244.99 24.97 0
 4 6 4 213.43 26.87 0
 -4 6 -4 242.75 24.17 0
 6 -6 4 167.47 19.66 0
 -6 -6 -4 193.2 21.06 0
 6 -6 4 189.23 20.18 0
 6 6 4 177.8 21.18 0
 -6 -6 -4 175.12 20.48 0
 -6 6 -4 174.07 23.76 0
 6 6 4 175.46 24.84 0
 -6 6 -4 181.33 19.4 0
 8 -6 4 615.54 26.53 0
 -8 -6 -4 691.61 23.38 0
 -8 -6 -4 583.47 21.3 0
 -8 6 -4 566.97 23.09 0
 8 -6 4 637.59 27.29 0
 -8 6 -4 673.91 27.15 0
 8 6 4 607.01 21.42 0
 8 6 4 666.02 22.27 0
 10 -6 4 25.07 17.58 0
 -10 6 -4 25.8 18.18 0
 10 -6 4 25.52 22.83 0
 10 6 4 34.49 18.17 0
 10 6 4 32.53 17.66 0
 -10 -6 -4 28.39 16.77 0
 -10 6 -4 31.73 21.88 0
 -10 -6 -4 23.4 18.09 0
 12 6 4 1.3 19.16 0
 12 -6 4 -2.44 23.11 0
 -12 6 -4 13.75 18.97 0
 -12 -6 -4 -4.41 19.27 0
 -12 -6 -4 3.68 17.53 0
 -12 6 -4 -2.67 18.27 0
 12 6 4 -5.16 18.24 0
 12 -6 4 0.64 17.69 0
 14 -6 4 206.61 22.04 0
 14 6 4 229 19.29 0
 -14 -6 -4 255.36 19.77 0
 -14 -6 -4 203.18 18.26 0
 -14 6 -4 224.28 23.2 0
 14 6 4 236.43 20.16 0
 -14 6 -4 211.2 22.84 0
 14 -6 4 220.75 22.99 0
 16 -6 4 479.27 23.28 0
 -16 -6 -4 506.66 20.36 0
 -16 -6 -4 599.65 21.47 0
 16 6 4 499.6 16.11 0
 16 -6 4 548.93 24.84 0
 -16 6 -4 501.32 20.77 0
 16 6 4 552.74 20.42 0
 -16 6 -4 613.14 26.17 0
 -18 -6 -4 21.53 16.49 0
 18 -6 4 41.78 17.55 0
 -18 6 -4 40.51 18.11 0
 18 -6 4 36.33 16.4 0
 18 6 4 27.54 16.37 0
 -18 6 -4 38.22 16.51 0
 18 6 4 47.97 16.77 0
 -18 -6 -4 54.21 17.85 0
 -20 6 -4 16.59 16.62 0
 20 -6 4 19.77 17.41 0
 20 -6 4 15.95 16.06 0
 20 6 4 2.03 15.62 0
 -20 -6 -4 20.29 16.64 0
 -20 -6 -4 9.15 16.49 0
 -20 6 -4 10.72 17.24 0
 20 6 4 -7.87 16.07 0
 22 -6 4 19.68 20.56 0
 -22 -6 -4 21.55 15.74 0
 22 6 4 -3.11 14.63 0
 22 6 4 -1.68 15.53 0
 -22 -6 -4 9.05 15.55 0
 -22 6 -4 16.61 20.43 0
 -22 6 -4 19.06 20.83 0
 22 -6 4 11.58 16.69 0
 24 -6 4 22.06 15.8 0
 24 -6 4 -0.74 16.68 0
 24 6 4 -3.41 14.63 0
 -24 -6 -4 0.55 14.72 0
 -24 -6 -4 9.98 15.06 0
 -24 6 -4 1.18 16.85 0
 -24 6 -4 -1.73 16.53 0
 24 6 4 5.02 15.08 0
 26 -6 4 100.79 15.94 0
 -26 6 -4 131.27 17.31 0
 26 -6 4 122.54 20.46 0
 26 6 4 109.9 11.71 0
 -26 -6 -4 150.95 16.56 0
 -26 -6 -4 106.7 15.95 0
 -26 6 -4 97.52 17.28 0
 26 6 4 96.18 11.49 0
 -28 6 -4 235.85 18.14 0
 28 -6 4 182.53 17.36 0
 28 -6 4 210.89 17.27 0
 -28 -6 -4 209.9 15.21 0
 28 6 4 192.43 15.52 0
 -28 6 -4 189.67 16.24 0
 -28 -6 -4 251.46 16.17 0
 28 6 4 217.29 15.46 0
 30 -6 4 23.72 15.81 0
 -30 6 -4 39.02 16.22 0
 -30 -6 -4 33.52 15.4 0
 -30 6 -4 14.07 14.7 0
 30 6 4 27.39 14.91 0
 -30 -6 -4 17.38 10.82 0
 30 6 4 26.6 14.85 0
 30 -6 4 18.42 15 0
 -33 7 4 11.94 18.25 0
 33 7 -4 23.25 14.58 0
 -31 7 4 22.66 17.54 0
 31 7 -4 22.77 14.53 0
 -31 -7 4 17.61 10.57 0
 31 -7 -4 6.32 19.82 0
 31 -7 -4 18.94 19.82 0
 -31 -7 4 23.81 14.89 0
 31 7 -4 37.39 14.77 0
 -31 7 4 26.14 20.44 0
 -29 -7 4 20.13 15.07 0
 29 -7 -4 16.86 19.58 0
 29 -7 -4 7.28 22.47 0
 -29 7 4 6.57 18.16 0
 29 7 -4 -0.27 14.87 0
 -29 -7 4 7.44 10.22 0
 -29 7 4 10.83 20.03 0
 29 7 -4 15.16 14.95 0
 -27 -7 4 42.78 14.68 0
 27 -7 -4 33.74 21.44 0
 -27 -7 4 34.1 15.71 0
 -27 7 4 34.5 24.41 0
 27 -7 -4 38.85 23.33 0
 27 7 -4 33.6 14.61 0
 27 7 -4 28.67 15.37 0
 -27 7 4 29.19 21.72 0
 -25 -7 4 76.08 15.45 0
 25 7 -4 74.94 15.25 0
 25 7 -4 82.7 15.99 0
 -25 -7 4 82.2 14.96 0
 -25 7 4 67.48 24.18 0
 25 -7 -4 71.9 21.83 0
 -25 7 4 84.88 26.08 0
 25 -7 -4 61.73 24.92 0
 -23 7 4 52.8 25.29 0
 23 -7 -4 41.94 27.61 0
 23 -7 -4 44.97 27.32 0
 -23 -7 4 70.11 16.24 0
 -23 -7 4 47.05 16.05 0
 23 7 -4 51.43 16.3 0
 23 7 -4 55.33 15.36 0
 21 -7 -4 3.87 30.87 0
 -21 7 4 -4.2 26.35 0
 -21 7 4 2.17 26.85 0
 -21 -7 4 -6.89 15.62 0
 21 7 -4 10.75 16.08 0
 21 -7 -4 1.35 28.89 0
 -21 -7 4 6.83 16.23 0
 21 7 -4 1.67 16.33 0
 -19 -7 4 12.83 17.28 0
 19 7 -4 22.43 15.47 0
 19 7 -4 27.13 16.66 0
 -19 -7 4 19.88 16.2 0
 -17 -7 4 192.85 17.46 0
 17 7 -4 225.61 18.78 0
 -17 -7 4 235.63 19.99 0
 17 7 -4 194.97 18.28 0
 15 7 -4 448.07 20.67 0
 15 7 -4 468.23 15.51 0
 -15 -7 4 506.17 20.05 0
 -15 -7 4 467.45 19.98 0
 13 7 -4 12.25 17.87 0
 -13 -7 4 15.06 18.65 0
 13 7 -4 31.77 17.71 0
 -11 -7 4 137.79 18.3 0
 11 7 -4 137.38 17.61 0
 -11 -7 4 162.47 18.7 0
 11 7 -4 143.16 17.86 0
 9 7 -4 23.44 17.45 0
 -9 -7 4 21.81 16.99 0
 9 7 -4 15.46 21.69 0
 -9 -7 4 24.86 18.19 0
 -7 -7 4 86.6 17.99 0
 7 7 -4 99.04 19.14 0
 7 7 -4 93.57 17.52 0
 -7 -7 4 85.82 17.02 0
 -5 -7 4 1062.9 25.6 0
 5 7 -4 1090.05 28.82 0
 5 7 -4 1130.44 27.2 0
 -5 -7 4 1057.71 23.78 0
 -3 -7 4 16.28 17.33 0
 3 -7 -4 10.99 33.28 0
 3 7 -4 23.08 17.51 0
 -3 7 4 13.59 31.32 0
 3 -7 -4 12.42 31.6 0
 -3 -7 4 15.97 22.77 0
 3 7 -4 36.48 23.39 0
 -3 7 4 18.8 31.4 0
 1 7 -4 14.29 20.59 0
 -1 -7 4 12.21 22.45 0
 -1 7 4 7.15 22.99 0
 1 7 -4 0.01 19.06 0
 -1 7 4 9.36 26.9 0
 1 -7 -4 11.42 27.02 0
 -1 -7 4 13.44 21.11 0
 1 -7 -4 5.34 26.76 0
 -1 7 -4 116.97 19.54 0
 -1 -7 -4 132.9 25.02 0
 1 -7 4 135.47 22.6 0
 1 -7 4 142.53 23.61 0
 1 7 4 131.39 24.15 0
 -1 7 -4 132.39 21.7 0
 -1 -7 -4 128.52 27.79 0
 1 7 4 124.24 24.17 0
 -3 7 -4 10.01 21.26 0
 3 -7 4 15.11 21.53 0
 3 7 4 4.8 18.63 0
 3 -7 4 3.59 22.38 0
 -3 7 -4 -2.27 22.92 0
 -3 -7 -4 5.55 23.31 0
 3 7 4 11.54 19.07 0
 -3 -7 -4 3.45 23.73 0
 -5 -7 -4 158.96 19.15 0
 5 -7 4 184.98 19.29 0
 5 -7 4 173.23 22.64 0
 5 7 4 177.85 23.24 0
 5 7 4 166.68 19.57 0
 -5 -7 -4 184.47 23.89 0
 -5 7 -4 172.23 22.38 0
 -5 7 -4 171.78 22.86 0
 -7 7 -4 264.59 20.11 0
 7 7 4 266.12 20.37 0
 7 7 4 271.2 19.14 0
 -7 -7 -4 291.66 21.37 0
 -7 -7 -4 257.29 19.95 0
 7 -7 4 249.77 23.65 0
 7 -7 4 290.69 23.7 0
 -7 7 -4 267.68 23.61 0
 -9 -7 -4 32.17 21.43 0
 9 -7 4 34.11 18.74 0
 -9 -7 -4 21.83 18.57 0
 -9 7 -4 30.92 21.61 0
 9 -7 4 19.38 22.14 0
 -9 7 -4 29.81 21.73 0
 9 7 4 39.46 17.77 0
 9 7 4 29.12 22.64 0
 11 -7 4 8.75 21.93 0
 -11 7 -4 12.82 22.32 0
 -11 7 -4 15.04 22.9 0
 -11 -7 -4 2.74 17.79 0
 11 -7 4 5.48 21.67 0
 -11 -7 -4 21.21 17.42 0
 11 7 4 18.36 17.5 0
 11 7 4 -1.2 18 0
 13 -7 4 32.56 21.7 0
 -13 7 -4 28.92 22.6 0
 -13 -7 -4 41.46 17.49 0
 -13 -7 -4 43.66 18.86 0
 -13 7 -4 42.45 22.51 0
 13 7 4 16.9 17.78 0
 13 7 4 35.11 18.15 0
 13 -7 4 33.71 22.13 0
 15 -7 4 213.46 23.78 0
 15 -7 4 201.56 18.71 0
 -15 -7 -4 225.94 18.86 0
 -15 7 -4 200.99 23.11 0
 -15 -7 -4 189.61 17.87 0
 15 7 4 245.61 18.56 0
 15 7 4 215.93 18.27 0
 -15 7 -4 228.69 23.49 0
 -17 7 -4 521.38 21.99 0
 17 7 4 547.69 19.86 0
 -17 -7 -4 486.57 19.1 0
 17 -7 4 470.71 25.04 0
 -17 -7 -4 574.19 20.23 0
 -17 7 -4 587.49 26.4 0
 17 7 4 501.89 19.41 0
 17 -7 4 563.4 25.44 0
 19 -7 4 18.81 20.35 0
 -19 7 -4 3.1 20.84 0
 19 7 4 3.46 16.83 0
 -19 -7 -4 17.77 17.3 0
 19 7 4 5.05 17.79 0
 19 -7 4 15.03 17 0
 -19 7 -4 10.84 20.37 0
 -19 -7 -4 12.53 16.68 0
 21 -7 4 10.84 18.96 0
 -21 7 -4 7.47 18.81 0
 -21 -7 -4 29.49 16.46 0
 -21 7 -4 31.84 20.25 0
 21 7 4 -0.33 16.52 0
 21 -7 4 26.53 17.57 0
 -21 -7 -4 19.03 11.54 0
 21 7 4 33.91 17.05 0
 23 -7 4 10.57 19.76 0
 -23 7 -4 12.16 20.02 0
 -23 7 -4 10.24 15.75 0
 -23 -7 -4 3.27 15.81 0
 23 -7 4 4.22 19.75 0
 -23 -7 -4 18.76 15.25 0
 23 7 4 2.96 14.87 0
 23 7 4 -9.01 14.97 0
 25 -7 4 27.05 16.19 0
 -25 -7 -4 21.59 11.5 0
 -25 -7 -4 39.64 15.22 0
 -25 7 -4 32.5 15.54 0
 -25 7 -4 27.14 16.31 0
 25 7 4 24.87 10.3 0
 25 7 4 43.6 15.08 0
 25 -7 4 29.83 20.57 0
 -27 7 -4 162.45 17.49 0
 27 7 4 165.6 15.19 0
 -27 7 -4 120.64 19.32 0
 -27 -7 -4 183.27 15.8 0
 -27 -7 -4 122.96 15.62 0
 27 -7 4 123.76 20.04 0
 27 -7 4 142.67 17.23 0
 27 7 4 152.34 15.1 0
 30 8 -4 3.98 14.62 0
 30 -8 -4 -1.51 25.16 0
 -30 -8 4 12.49 15.85 0
 30 8 -4 9.01 14.62 0
 -30 8 4 -0.35 22.49 0
 -30 8 4 0.19 21.31 0
 30 -8 -4 8.19 24.51 0
 -30 -8 4 -7.11 14.51 0
 28 -8 -4 5.98 25.65 0
 -28 8 4 4.84 24.71 0
 -28 -8 4 20.88 14.21 0
 28 -8 -4 12.3 25.41 0
 -28 8 4 0.59 28.94 0
 -28 -8 4 8 14.38 0
 28 8 -4 8.01 15.07 0
 28 8 -4 -2.36 14.8 0
 -26 -8 4 20.52 15.57 0
 26 -8 -4 15.52 30.72 0
 -26 8 4 17.45 29.12 0
 26 -8 -4 22.27 32.55 0
 26 8 -4 15.46 15.37 0
 26 8 -4 25.29 14.83 0
 -26 -8 4 12.02 15.05 0
 -26 8 4 19.45 30.83 0
 -24 -8 4 67.38 15.38 0
 -24 -8 4 60.49 14.94 0
 24 8 -4 58.87 14.64 0
 24 8 -4 51.34 15.23 0
 -22 -8 4 31.53 15.81 0
 22 8 -4 33.32 15.67 0
 22 8 -4 27.68 16.11 0
 -22 -8 4 66.08 17.31 0
 20 8 -4 286.06 18.74 0
 20 8 -4 275.58 17.77 0
 -20 -8 4 273.51 17.73 0
 -20 -8 4 301.43 18.6 0
 -18 -8 4 1.77 16.58 0
 -18 -8 4 1.93 15.88 0
 18 8 -4 12.36 15.94 0
 18 8 -4 9.07 17.19 0
 -16 -8 4 116.69 16.92 0
 16 8 -4 110.52 17.48 0
 16 8 -4 126.83 17.75 0
 -16 -8 4 111.82 17.79 0
 14 8 -4 22.51 18.01 0
 14 8 -4 29.48 16.89 0
 -14 -8 4 17.88 16.23 0
 -14 -8 4 22.85 17.09 0
 12 8 -4 60.09 17.68 0
 12 8 -4 58.39 17.17 0
 -12 -8 4 66.97 16.55 0
 -12 -8 4 52.73 17.58 0
 -10 -8 4 16.87 15.93 0
 10 8 -4 11.78 16.38 0
 10 8 -4 9.62 17.09 0
 -10 -8 4 21.16 21.33 0
 8 8 -4 38.46 16.59 0
 8 8 -4 36.24 17.56 0
 -8 -8 4 36.36 16.21 0
 -8 -8 4 45.27 17.7 0
 -6 -8 4 78.13 16.92 0
 6 8 -4 72.7 18.84 0
 -6 -8 4 86.37 18.3 0
 6 8 -4 96.47 20.41 0
 4 8 -4 7.31 18.71 0
 4 8 -4 13.09 17.08 0
 -4 -8 4 21.02 16.3 0
 -4 -8 4 22.98 22.34 0
 -2 8 4 11.7 30.12 0
 -2 -8 4 12.02 22.4 0
 2 -8 -4 12.07 31.11 0
 -2 8 4 4.78 26.65 0
 2 8 -4 17.61 19.08 0
 2 -8 -4 6.34 26.5 0
 2 8 -4 10.05 16.57 0
 -2 -8 4 4.02 16.91 0
 0 8 4 1862.33 37.28 0
 0 8 -4 1803.85 31.82 0
 0 -8 -4 1963.08 41.29 0
 0 -8 4 1924.44 32.66 0
 0 8 4 1908.97 40.25 0
 0 -8 4 1910.79 35.19 0
 0 8 -4 1844.88 31.58 0
 0 -8 -4 1819.86 39.61 0
 -2 -8 -4 659.7 28.73 0
 2 -8 4 640.19 28.25 0
 2 8 4 602.29 27.31 0
 2 -8 4 633.78 26.87 0
 -2 -8 -4 596.64 27.46 0
 -2 8 -4 631.42 26.08 0
 2 8 4 649.69 27.75 0
 -2 8 -4 590.6 28.05 0
 -4 8 -4 269.14 23.84 0
 4 -8 4 282.5 23.84 0
 -4 -8 -4 270.54 24.95 0
 -4 -8 -4 286.75 20.3 0
 -4 8 -4 255.75 25.34 0
 4 -8 4 282.04 25.99 0
 4 8 4 274.24 21.72 0
 4 8 4 283.56 24.71 0
 -6 8 -4 76.13 23.55 0
 -6 -8 -4 85.7 21.78 0
 6 -8 4 81.01 23.27 0
 -6 8 -4 78.71 22.15 0
 -6 -8 -4 83.5 22.66 0
 6 -8 4 77.19 23.24 0
 6 8 4 77.75 17.7 0
 6 8 4 84.32 22.05 0
 -8 -8 -4 164.17 18.1 0
 -8 8 -4 154.34 24.31 0
 -8 8 -4 144.1 23.8 0
 8 8 4 147.49 17.27 0
 8 -8 4 167.59 25.01 0
 8 -8 4 146.8 24.38 0
 8 8 4 153.85 21.33 0
 -8 -8 -4 173.43 22.08 0
 10 8 4 266.72 17.75 0
 10 -8 4 273.31 25.68 0
 10 -8 4 249.88 23.93 0
 -10 -8 -4 267.95 17.99 0
 -10 -8 -4 273.69 18.45 0
 10 8 4 266.88 21.57 0
 -10 8 -4 273.84 25.06 0
 -10 8 -4 262.54 24.26 0
 12 -8 4 680.4 31.11 0
 12 -8 4 607.76 26.98 0
 -12 -8 -4 546.85 19.28 0
 -12 8 -4 616.03 26.84 0
 12 8 4 640.99 19.84 0
 -12 -8 -4 703.56 20.77 0
 12 8 4 608.03 19.57 0
 -12 8 -4 654.95 26.82 0
 14 8 4 71.56 16.77 0
 14 -8 4 80.09 20.91 0
 14 -8 4 75.39 20.98 0
 -14 8 -4 75.41 22.27 0
 -14 -8 -4 77.58 17.15 0
 14 8 4 74.64 17.06 0
 -14 8 -4 89.95 22.59 0
 -14 -8 -4 79.95 16.09 0
 -16 -8 -4 131.78 16.63 0
 -16 -8 -4 179.36 16.99 0
 -16 8 -4 147.01 21.66 0
 16 -8 4 135.11 21.8 0
 16 8 4 145.99 17.86 0
 16 -8 4 137.99 20.97 0
 16 8 4 149.25 16.42 0
 -16 8 -4 138.73 21.31 0
 18 -8 4 3.88 20.51 0
 18 -8 4 11.48 19.38 0
 18 8 4 3.79 15.91 0
 -18 8 -4 2.57 20.32 0
 -18 -8 -4 10.67 16.24 0
 -18 -8 -4 1.15 15.59 0
 -18 8 -4 -1.12 20.74 0
 18 8 4 13.44 15.27 0
 20 -8 4 13.94 19.83 0
 20 8 4 12.25 15.76 0
 -20 -8 -4 18.67 15.72 0
 -20 -8 -4 24.27 16.43 0
 -20 8 -4 3.46 19.69 0
 -20 8 -4 20.96 20.27 0
 20 -8 4 -0.72 20.53 0
 20 8 4 25.15 15.65 0
 -22 8 -4 166.93 17.61 0
 -22 8 -4 192.53 18.1 0
 -22 -8 -4 188.64 15.86 0
 22 -8 4 164.84 20.65 0
 -22 -8 -4 199.85 15.88 0
 22 8 4 179.09 16.37 0
 22 8 4 154.92 12 0
 22 -8 4 197.18 21.64 0
 24 -8 4 26.2 19.06 0
 24 8 4 19.38 15.05 0
 -24 -8 -4 38.16 15.57 0
 24 8 4 35.87 14.74 0
 -24 -8 -4 44.94 15.26 0
 -24 8 -4 40.29 19.65 0
 -24 8 -4 30.45 15.5 0
 24 -8 4 27.76 19.54 0
 -26 8 -4 -3.87 20.11 0
 26 -8 4 -2.65 16.11 0
 26 -8 4 11.34 19.35 0
 -26 -8 -4 10.94 14.71 0
 -26 8 -4 1.62 18.29 0
 26 8 4 -0.27 15.13 0
 26 8 4 1.93 14.52 0
 -26 -8 -4 10 14.68 0
 -27 -9 4 50.6 10.29 0
 27 9 -4 34.51 15.57 0
 27 9 -4 50.79 15.1 0
 -27 -9 4 44.44 14.52 0
 -25 -9 4 11.9 15.51 0
 25 9 -4 16.48 14.13 0
 -25 -9 4 24.35 14.59 0
 25 9 -4 27.79 14.89 0
 -23 -9 4 -16.53 14.93 0
 -23 -9 4 2.75 15.88 0
 23 9 -4 4.01 10.35 0
 23 9 -4 -1.26 15.09 0
 -21 -9 4 13.69 16.19 0
 21 9 -4 -1.7 16.03 0
 21 9 -4 21.7 15.63 0
 -21 -9 4 8.62 15.16 0
 -19 -9 4 -11.59 16.78 0
 19 9 -4 0.93 16.3 0
 19 9 -4 2.62 15.19 0
 -17 -9 4 119.85 16.6 0
 17 9 -4 118.64 16.13 0
 -17 -9 4 122.45 17.56 0
 17 9 -4 137.24 16.95 0
 -15 -9 4 678.84 19.19 0
 15 9 -4 682.56 19.13 0
 15 9 -4 658.61 19.82 0
 -15 -9 4 744.1 22.79 0
 13 9 -4 -5.72 16.23 0
 13 9 -4 9.52 19.71 0
 -13 -9 4 -16.55 14.96 0
 -13 -9 4 18.17 16.54 0
 11 9 -4 40.19 20.95 0
 -11 -9 4 45.47 15.98 0
 11 9 -4 47.35 15.28 0
 -11 -9 4 29.12 17.17 0
 -9 -9 4 76.75 19.6 0
 9 9 -4 73.77 16.05 0
 -9 -9 4 67.22 17.14 0
 9 9 -4 82.63 16.95 0
 7 9 -4 46.75 17.02 0
 7 9 -4 44.66 16.19 0
 -7 -9 4 45.72 16.57 0
 -7 -9 4 47.58 17.61 0
 5 9 -4 825.19 24.16 0
 5 9 -4 849.72 22.45 0
 -5 -9 4 903.05 26.09 0
 -5 -9 4 879.39 24.73 0
 3 9 -4 117.13 17.36 0
 -3 -9 4 133.4 21.99 0
 3 9 -4 118.18 23.38 0
 -3 -9 4 123.27 24.14 0
 1 -9 -4 69.7 29.66 0
 -1 9 4 69.96 27.54 0
 -1 -9 4 64.49 17.03 0
 1 9 -4 73.65 20.57 0
 -1 -9 4 69.06 24.11 0
 -1 9 4 64.75 26.93 0
 1 9 -4 79.05 18.98 0
 1 -9 -4 73.69 28.8 0
 -1 -9 -4 276.31 24.91 0
 -1 9 -4 236.84 22.51 0
 1 -9 4 265.72 23.24 0
 1 -9 4 269.62 25.42 0
 1 9 4 261.1 23.75 0
 1 9 4 269.9 23.83 0
 -1 9 -4 271.61 24.5 0
 -3 -9 -4 10.34 18.1 0
 3 9 4 2.09 22.04 0
 -3 9 -4 0.22 26.74 0
 3 -9 4 2.55 22.52 0
 3 9 4 3.16 21.5 0
 3 -9 4 3.42 21.67 0
 -3 9 -4 5.26 23.81 0
 -3 -9 -4 1.39 21.52 0
 -5 9 -4 113.47 25.17 0
 -5 -9 -4 104.45 19.05 0
 5 9 4 111.24 22.31 0
 -5 -9 -4 106.93 23.34 0
 5 9 4 87.05 18.42 0
 5 -9 4 101.68 22.29 0
 5 -9 4 92.57 23 0
 -5 9 -4 97.43 24.57 0
 -7 -9 -4 251.9 22.65 0
 7 9 4 246.76 22.97 0
 7 -9 4 263.44 26.07 0
 7 -9 4 247.85 25.09 0
 7 9 4 248.34 19.97 0
 -7 9 -4 239.22 22.38 0
 -7 9 -4 245.5 23.74 0
 -7 -9 -4 270.82 20.45 0
 -9 -9 -4 -7.67 17.14 0
 9 9 4 0.84 17.14 0
 -9 9 -4 1.28 22.52 0
 9 9 4 4.88 16.69 0
 9 -9 4 0.48 23.4 0
 -9 -9 -4 6.69 17.02 0
 9 -9 4 -5.61 23.75 0
 -9 9 -4 4.38 23.84 0
 11 9 4 97.67 20 0
 11 -9 4 85.24 21.43 0
 -11 9 -4 73.22 24.56 0
 -11 -9 -4 84.04 16.97 0
 11 -9 4 77.17 22.01 0
 -11 -9 -4 61.49 16.75 0
 11 9 4 83.87 17.43 0
 -13 -9 -4 80.34 20.55 0
 13 -9 4 79.14 20.97 0
 -13 9 -4 70.93 24.35 0
 13 -9 4 62.94 21.35 0
 13 9 4 81.67 15.52 0
 13 9 4 79.46 15.89 0
 -13 9 -4 57.47 23.86 0
 -13 -9 -4 72.46 15.72 0
 -15 9 -4 349.17 27.23 0
 -15 -9 -4 322.44 17.75 0
 -15 -9 -4 364.57 17.97 0
 15 -9 4 307.41 24.41 0
 -15 9 -4 331.18 27.19 0
 15 9 4 351.58 17.71 0
 15 9 4 359.86 17.87 0
 15 -9 4 348.77 27.43 0
 -17 -9 -4 445.05 19.02 0
 17 9 4 409.3 18.28 0
 -17 9 -4 399.47 26.48 0
 17 -9 4 407.49 27.15 0
 17 9 4 393.35 18.32 0
 17 -9 4 385.71 24.6 0
 -17 9 -4 424.26 26.76 0
 -17 -9 -4 381.93 18.09 0
 19 9 4 13.01 15.57 0
 19 -9 4 -0.94 18.76 0
 -19 -9 -4 15.25 15.44 0
 -19 -9 -4 2.83 16.4 0
 -19 9 -4 7.73 21.58 0
 19 9 4 -0.29 15.23 0
 -19 9 -4 4.83 19.16 0
 19 -9 4 -4.79 19.96 0
 -21 -9 -4 63.6 15.85 0
 21 -9 4 44.83 23.69 0
 -21 9 -4 54.4 20.26 0
 21 9 4 55.49 16.14 0
 21 -9 4 65.63 19.74 0
 21 9 4 51.24 15.82 0
 -21 -9 -4 65.45 16.69 0
 -21 9 -4 53.28 22.39 0
 23 -9 4 15.59 21.77 0
 23 -9 4 7.86 19.71 0
 -23 -9 -4 21.01 16.73 0
 23 9 4 2.97 10.36 0
 -23 9 -4 23.86 18.56 0
 -23 9 -4 8.45 20.09 0
 -23 -9 -4 18.16 15.89 0
 23 9 4 10.65 15.35 0
 24 10 -4 159.34 15.92 0
 -24 -10 4 171.98 16.56 0
 24 10 -4 168.15 16.89 0
 -22 -10 4 19.4 15.83 0
 22 10 -4 16.46 15.21 0
 22 10 -4 15.9 15.92 0
 -20 -10 4 28.43 16.03 0
 -20 -10 4 21.76 15.58 0
 20 10 -4 11.23 16.11 0
 20 10 -4 27.03 15.02 0
 -18 -10 4 68.92 16.26 0
 -18 -10 4 82.72 15.55 0
 18 10 -4 79.92 15.49 0
 18 10 -4 75.13 16.02 0
 16 10 -4 44.08 15.07 0
 -16 -10 4 26.83 16.48 0
 -16 -10 4 8.81 19.14 0
 16 10 -4 29.77 15.91 0
 -14 -10 4 192.14 19.73 0
 14 10 -4 148.4 17.48 0
 -14 -10 4 195.93 17.74 0
 14 10 -4 161 16.69 0
 12 10 -4 107.81 17.08 0
 -12 -10 4 113.23 19.4 0
 12 10 -4 86.61 15.63 0
 -12 -10 4 72.6 17.68 0
 -10 -10 4 97.99 19.76 0
 10 10 -4 79.83 17.19 0
 10 10 -4 101.58 16.44 0
 -10 -10 4 102.26 17.82 0
 8 10 -4 88.77 17.12 0
 -8 -10 4 100.92 15.89 0
 -8 -10 4 101.95 17.51 0
 8 10 -4 101.38 19.3 0
 6 10 -4 192.53 22.69 0
 6 10 -4 191.5 20.6 0
 -6 -10 4 209.73 21.4 0
 -6 -10 4 182.92 19.2 0
 4 10 -4 42.63 19.6 0
 -4 -10 4 50.26 22.13 0
 -4 -10 4 50.39 19.74 0
 4 10 -4 33.97 21.87 0
 2 10 -4 13.21 19.28 0
 -2 -10 4 23.57 21.49 0
 2 10 -4 10.53 20.83 0
 -2 -10 4 11.5 15.44 0
 0 10 -4 46.13 19.51 0
 0 10 4 55.76 25.46 0
 0 -10 4 49.27 20.06 0
 0 -10 -4 53.53 27.23 0
 0 10 4 48.61 25.92 0
 0 -10 4 47.41 21.04 0
 0 10 -4 55.33 17.27 0
 0 -10 -4 50.68 25.84 0
 2 10 4 7.68 23.42 0
 -2 -10 -4 8.59 21.87 0
 -2 10 -4 12.7 23.43 0
 2 10 4 5.54 22.53 0
 -2 10 -4 2.87 18.38 0
 2 -10 4 7.95 19.88 0
 -2 -10 -4 13.71 20.62 0
 2 -10 4 10.29 21.39 0
 4 10 4 159.11 22.08 0
 -4 -10 -4 152.28 22.14 0
 4 -10 4 146.47 25.84 0
 4 -10 4 163.73 21.78 0
 -4 10 -4 147.88 20.92 0
 -4 10 -4 154.74 25.15 0
 4 10 4 157.86 20.87 0
 -6 10 -4 43.53 24.02 0
 6 10 4 41.22 20.67 0
 6 -10 4 42.99 24.05 0
 -6 -10 -4 49.95 17.21 0
 6 10 4 34.66 20.92 0
 6 -10 4 44.93 24.79 0
 -6 10 -4 40.17 23.53 0
 -6 -10 -4 59.97 19.93 0
 -8 -10 -4 205.57 21.5 0
 8 -10 4 186.82 26.94 0
 8 -10 4 215.76 29.98 0
 -8 -10 -4 210.52 18.56 0
 -8 10 -4 187.27 28.39 0
 -8 10 -4 198.51 25.78 0
 8 10 4 194.87 21.85 0
 8 10 4 212.11 18.84 0
 -10 10 -4 37.64 24.08 0
 -10 10 -4 40.89 26.62 0
 -10 -10 -4 43.65 16.74 0
 10 10 4 34.08 16.11 0
 10 -10 4 46.58 27.43 0
 10 -10 4 47.52 27.53 0
 10 10 4 49.88 16.84 0
 -10 -10 -4 49.4 16.69 0
 12 10 4 152.49 16.72 0
 12 10 4 153.68 16.89 0
 -12 -10 -4 156.99 16.34 0
 -12 10 -4 144.98 26.65 0
 -12 -10 -4 177.75 17.73 0
 -12 10 -4 154.65 26.71 0
 12 -10 4 162.93 27.78 0
 12 -10 4 152.49 28.33 0
 -14 10 -4 83.33 25.79 0
 14 -10 4 80.79 28.56 0
 -14 10 -4 79.17 25.55 0
 -14 -10 -4 92.06 16.09 0
 14 10 4 88.39 15.56 0
 -14 -10 -4 76.45 15.95 0
 14 -10 4 88.33 26.12 0
 14 10 4 66.99 16.29 0
 16 10 4 66.05 17.39 0
 -16 -10 -4 72.14 20.74 0
 16 -10 4 65.95 26.59 0
 16 10 4 67.03 16.56 0
 16 -10 4 75.21 30.39 0
 -16 -10 -4 67.39 15.65 0
 -16 10 -4 54.35 25.22 0
 18 10 4 10.13 15.34 0
 -18 -10 -4 -11.01 14.47 0
 -18 -10 -4 5.77 16.77 0
 -18 10 -4 1.15 23.15 0
 -18 10 -4 -2.56 21.68 0
 18 10 4 5.62 15.17 0
 18 -10 4 -5.28 25.28 0
 18 -10 4 -0.81 22.63 0
 -20 -10 -4 21.28 15.83 0
 -20 10 -4 4.51 18.21 0
 20 -10 4 17.62 25.61 0
 20 10 4 36.58 15.08 0
 -20 10 -4 26.35 21.04 0
 20 -10 4 28.25 25.56 0
 -20 -10 -4 23.18 15.75 0
 20 10 4 39.32 16.2 0
 -19 -11 4 34.29 15.67 0
 -19 -11 4 25.28 14.9 0
 19 11 -4 28.47 17.02 0
 19 11 -4 22.8 15.22 0
 17 11 -4 78.76 19.41 0
 17 11 -4 65.26 17.16 0
 -17 -11 4 72.57 15.36 0
 -17 -11 4 76.63 17.28 0
 -15 -11 4 92.46 15.51 0
 15 11 -4 71.73 17.06 0
 -15 -11 4 93.83 20.13 0
 15 11 -4 79.56 15.48 0
 -13 -11 4 -1.72 16.31 0
 -13 -11 4 20.26 18.16 0
 13 11 -4 -4.11 14.08 0
 13 11 -4 2.6 16.05 0
 11 11 -4 45.87 21.58 0
 11 11 -4 42.1 15.66 0
 -11 -11 4 48.63 18.13 0
 -11 -11 4 46.85 13.9 0
 9 11 -4 89.38 21.43 0
 9 11 -4 74.46 19.81 0
 -9 -11 4 70.02 16.73 0
 -9 -11 4 82.3 21.96 0
 -7 -11 4 3.17 15.97 0
 -7 -11 4 -1.32 21.4 0
 7 11 -4 11.77 16.31 0
 7 11 -4 -5.44 19.04 0
 5 11 -4 339.95 20.94 0
 5 11 -4 356.68 22.96 0
 -5 -11 4 370.32 21.41 0
 -5 -11 4 367.87 23.44 0
 -3 -11 4 183.83 20.41 0
 -3 -11 4 182.54 23.09 0
 3 11 -4 172.05 22.14 0
 3 11 -4 167.24 20.03 0
 1 11 -4 6.99 17.65 0
 -1 -11 4 8.21 18.87 0
 -1 -11 4 8.15 23.65 0
 1 11 -4 -2.57 20.34 0
 -1 11 -4 4.31 21.6 0
 -1 -11 -4 4.71 26.72 0
 1 11 4 7.46 23.32 0
 1 -11 4 -2.15 22.1 0
 1 11 4 -0.53 26.22 0
 -1 11 -4 9.8 19.76 0
 -1 -11 -4 1.51 25.67 0
 1 -11 4 19.66 23.67 0
 3 -11 4 45.24 19.4 0
 -3 -11 -4 44.93 21.54 0
 3 -11 4 42.72 25.85 0
 -3 -11 -4 44.47 22.93 0
 3 11 4 37.55 19.11 0
 3 11 4 44.45 22.17 0
 -3 11 -4 41.05 25.21 0
 -3 11 -4 47.13 24.07 0
 5 11 4 593.82 24.58 0
 -5 11 -4 556.72 31.62 0
 5 -11 4 643.63 33.27 0
 -5 -11 -4 591.16 25.45 0
 -5 11 -4 556.85 31.47 0
 5 11 4 565.92 24.22 0
 -5 -11 -4 587.85 23.76 0
 5 -11 4 560.48 33.36 0
 -7 -11 -4 262.67 22.22 0
 7 11 4 251.92 18.06 0
 7 -11 4 235.74 34.83 0
 7 -11 4 275.21 32.63 0
 -7 11 -4 242.12 30.25 0
 -7 11 -4 219.81 30.68 0
 7 11 4 268.38 22.49 0
 9 11 4 0.28 17.32 0
 -9 11 -4 3.45 38.5 0
 -9 -11 -4 8.98 16.98 0
 -9 11 -4 2.28 35.27 0
 9 -11 4 3.58 45.66 0
 9 11 4 7.33 20.03 0
 -9 -11 -4 -3.46 16.42 0
 -11 -11 -4 40.5 16.9 0
 -11 -11 -4 37.06 16.06 0
 11 11 4 26.03 15.97 0
 11 11 4 43.57 16.89 0
 13 11 4 41.45 19.47 0
 13 11 4 40.76 16.44 0
 -13 -11 -4 40.43 16.64 0
 -13 -11 -4 38.19 15.7 0
 15 11 4 13.94 15.62 0
 -15 -11 -4 20.51 19.49 0
 -15 -11 -4 -5.24 19.96 0
 15 11 4 11.4 15.55 0
 14 12 -4 1.9 16.57 0
 -14 -12 4 25.7 15.53 0
 14 12 -4 16.01 18.6 0
 -12 -12 4 139.09 19.18 0
 12 12 -4 115.45 17.46 0
 -12 -12 4 151.49 17.51 0
 12 12 -4 127.17 16.11 0
 10 12 -4 404.51 21.72 0
 -10 -12 4 431.02 24.34 0
 -10 -12 4 424.86 18.94 0
 10 12 -4 420.56 23.11 0
 8 12 -4 44.2 14.81 0
 -8 -12 4 47 20.42 0
 -8 -12 4 36.01 18.58 0
 8 12 -4 31.32 20.41 0
 6 12 -4 -2.02 14.65 0
 -6 -12 4 -2.44 18.11 0
 -6 -12 4 -0.07 19.89 0
 6 12 -4 0.58 16.06 0
 -4 -12 4 9.95 19.63 0
 4 12 -4 6.76 17.12 0
 -4 -12 4 18.24 19.1 0
 4 12 -4 6.52 20.18 0
 -2 -12 4 5.86 23.38 0
 -2 -12 4 0.65 21.86 0
 2 12 -4 -1.21 20.5 0
 2 12 -4 4.49 19.62 0
 0 12 -4 100.77 21.78 0
 0 12 -4 138.04 24.24 0
 0 -12 4 160.7 24.34 0
 0 -12 4 139.18 22.08 0
 -2 -12 -4 112.69 33.16 0
 -2 -12 -4 123.83 33.06 0
 2 -12 4 126.87 26.24 0
 2 12 4 93.55 26.02 0
 2 12 4 109.17 29.45 0
 -2 12 -4 109.21 26.58 0
 -2 12 -4 84.15 23.33 0
 2 -12 4 108.31 27.12 0
 4 -12 4 15.11 34.58 0
 4 12 4 11.81 18.97 0
 -4 -12 -4 20.73 21.51 0
 -4 12 -4 18.8 30.77 0
 -4 -12 -4 16.49 22.78 0
 -4 12 -4 14.87 29.15 0
 4 -12 4 20.83 34.15 0
 4 12 4 16.6 22.44 0
 6 12 4 104.7 20.31 0
 -6 -12 -4 102.75 20.14 0
 6 12 4 112.95 20.34 0
 -6 -12 -4 110.34 21.18 0
 -8 -12 -4 47.9 19.68 0
 8 12 4 69.13 19.93 0
 -8 -12 -4 62.16 19.97 0
 8 12 4 50.57 19.89 0
 10 12 4 72.42 19.9 0
 10 12 4 71.52 20.07 0
 -39 1 5 34.08 15.01 0
 39 -1 -5 20.34 14.62 0
 -39 1 5 37.77 16.27 0
 -39 -1 5 39.26 14.02 0
 39 1 -5 44.82 14.84 0
 39 -1 -5 30.66 15.07 0
 -39 -1 5 30.29 15.44 0
 39 1 -5 18.69 14.72 0
 -37 1 5 4.54 15.65 0
 37 1 -5 20.4 14.46 0
 -37 -1 5 20.94 15.4 0
 37 -1 -5 13.83 15.08 0
 -37 -1 5 15.24 14.82 0
 37 1 -5 14.92 14.83 0
 -37 1 5 7.84 14.76 0
 37 -1 -5 22.57 14.92 0
 35 -1 -5 6.67 14.88 0
 -35 -1 5 0.22 15.67 0
 -35 -1 5 17.75 15.49 0
 -35 1 5 6.98 14.94 0
 -35 1 5 -4.63 15.96 0
 35 1 -5 6.22 15.59 0
 35 1 -5 15.08 15.65 0
 35 -1 -5 -14.5 15.75 0
 -33 -1 5 89.95 15.34 0
 33 1 -5 75.19 15.73 0
 -33 1 5 100.19 17.51 0
 33 1 -5 76.83 15.69 0
 33 -1 -5 82.18 16.15 0
 33 -1 -5 69.13 16.84 0
 -33 -1 5 92.03 15.59 0
 -33 1 5 68.38 16.29 0
 -31 -1 5 89.97 16.04 0
 -31 1 5 82.06 16.97 0
 31 -1 -5 80.42 16.5 0
 -31 1 5 87.81 16.52 0
 31 -1 -5 64.47 16.6 0
 31 1 -5 59.01 15.04 0
 -31 -1 5 88.57 16.24 0
 31 1 -5 64.99 15.86 0
 -29 -1 5 19.12 15.69 0
 -29 1 5 11.95 17.51 0
 29 1 -5 17.41 15.06 0
 -29 -1 5 10.54 15.71 0
 -29 1 5 -2 17.22 0
 29 1 -5 21.21 15.62 0
 29 -1 -5 9.26 16.96 0
 29 -1 -5 6.62 17.01 0
 -27 -1 5 34.96 17.54 0
 27 1 -5 7.25 16.71 0
 27 1 -5 3.4 17.12 0
 -27 -1 5 8.47 16.2 0
 27 -1 -5 18.27 16.45 0
 -27 1 5 24.76 17.27 0
 27 -1 -5 9.47 17.23 0
 -27 1 5 15.97 17.32 0
 25 1 -5 19.06 17.56 0
 -25 -1 5 21.78 17.61 0
 -25 -1 5 24.36 17.83 0
 25 -1 -5 5.34 17.81 0
 -25 1 5 24.22 17.57 0
 25 -1 -5 13.16 18.07 0
 -25 1 5 43.13 17.76 0
 25 1 -5 21.49 17.61 0
 -23 -1 5 80.72 19.28 0
 -23 1 5 77 18.44 0
 23 1 -5 79.91 18.13 0
 23 1 -5 69.08 18.27 0
 -23 1 5 69.74 17.34 0
 -23 -1 5 82.59 18.76 0
 23 -1 -5 63.2 12.98 0
 23 -1 -5 66.33 17.81 0
 21 1 -5 105.62 18.42 0
 -21 -1 5 120.54 19.74 0
 -21 -1 5 155.8 19.36 0
 21 1 -5 148.72 19.25 0
 21 -1 -5 121.31 18.31 0
 -21 1 5 123.49 17.61 0
 21 -1 -5 112.62 17.31 0
 -21 1 5 129.85 18.7 0
 -19 1 5 9.4 19.04 0
 -19 -1 5 6.64 19.57 0
 -19 1 5 -0.19 18.66 0
 19 1 -5 15.39 13.52 0
 19 -1 -5 17.67 17.98 0
 19 -1 -5 16.82 18.13 0
 19 1 -5 13.07 18.87 0
 -19 -1 5 6.3 19.02 0
 -17 1 5 443.8 23.27 0
 17 1 -5 473.94 23.15 0
 17 -1 -5 406.78 22.66 0
 -17 -1 5 478.35 23.44 0
 17 -1 -5 439.02 23.1 0
 17 1 -5 444.38 23.21 0
 -17 -1 5 513.29 23.6 0
 -17 1 5 489.2 23.58 0
 15 1 -5 17.48 25.21 0
 -15 1 5 5.53 22.82 0
 -15 -1 5 11.94 24.8 0
 15 -1 -5 -3.07 22.58 0
 -15 1 5 6.3 23.22 0
 -15 -1 5 -0.2 24.03 0
 15 1 -5 7.55 16.58 0
 15 -1 -5 4.67 22.94 0
 -13 -1 5 42.29 27.66 0
 13 -1 -5 48.95 26.16 0
 13 1 -5 46.24 19.76 0
 13 1 -5 36.35 27.22 0
 13 -1 -5 39.01 25.95 0
 -13 1 5 40.87 26.42 0
 -13 -1 5 24.11 19.19 0
 -13 1 5 35.97 26.12 0
 -11 1 5 8.08 25.94 0
 -11 1 5 2.41 25.69 0
 -11 -1 5 -3.83 18.51 0
 11 -1 -5 0.3 25.12 0
 11 -1 -5 1.01 25.55 0
 11 1 -5 -3.16 26.73 0
 11 1 -5 0.48 26.27 0
 -11 -1 5 -6.33 26.94 0
 9 1 -5 132.29 28.52 0
 -9 -1 5 154.05 27.64 0
 9 -1 -5 133.65 28.09 0
 -9 1 5 139.59 26.99 0
 9 -1 -5 134.92 26.62 0
 -9 -1 5 146.97 28.64 0
 -9 1 5 148.7 27.81 0
 9 1 -5 142.85 19.01 0
 7 -1 -5 -0.67 27.23 0
 -7 1 5 -2.54 26.34 0
 7 1 -5 6.5 27.93 0
 7 -1 -5 -2.56 26.54 0
 7 1 -5 -0.15 27.35 0
 -7 1 5 3.71 26.87 0
 -7 -1 5 2.02 27.09 0
 -7 -1 5 0.28 27.21 0
 -5 -1 5 677.24 32.98 0
 -5 -1 5 697.79 25.89 0
 5 1 -5 679.4 33.37 0
 -5 1 5 681.23 34.2 0
 5 -1 -5 662.98 34.31 0
 5 1 -5 644.89 33.26 0
 5 -1 -5 674.18 33.16 0
 -5 1 5 692.41 33.82 0
 3 -1 -5 2.57 30.77 0
 -3 -1 5 22.92 33.45 0
 -3 1 5 2.99 32.26 0
 -3 -1 5 1.32 22.79 0
 -3 1 5 -0.29 33 0
 3 1 -5 -2.4 22.92 0
 3 1 -5 3.12 21.62 0
 3 -1 -5 -0.39 32.41 0
 1 -1 -5 309.72 33.57 0
 -1 1 5 317.92 33.49 0
 -1 -1 5 340.9 33.22 0
 -1 -1 5 303.04 32.37 0
 1 1 -5 322.69 23.73 0
 1 1 -5 323.42 32.96 0
 -1 1 5 313.48 34.98 0
 1 -1 -5 332.48 33.97 0
 1 1 5 8.55 29 0
 1 -1 5 -8.86 19.37 0
 -1 1 -5 -22.05 20.77 0
 1 -1 5 -8.96 28.59 0
 -1 -1 -5 -0.2 28.5 0
 1 1 5 -4.36 21.56 0
 -1 -1 -5 -3.37 21.43 0
 -1 1 -5 -1.42 20 0
 3 -1 5 282.4 29.19 0
 3 1 5 298.14 31.49 0
 -3 -1 -5 278.56 29.33 0
 -3 1 -5 288.97 29.17 0
 -3 1 -5 306.76 29.92 0
 3 1 5 285.66 30.24 0
 -3 -1 -5 299.62 30.79 0
 3 -1 5 301.27 29.96 0
 -5 1 -5 11.34 27.72 0
 5 -1 5 -2.3 27.25 0
 5 -1 5 -5.66 26.49 0
 -5 1 -5 6.92 26.33 0
 5 1 5 -9.06 28.47 0
 5 1 5 -0.89 26.75 0
 -5 -1 -5 -7.18 27.24 0
 -5 -1 -5 -0.12 27.41 0
 -7 1 -5 202.26 28.4 0
 -7 1 -5 153.73 27.02 0
 7 -1 5 184.41 28.28 0
 -7 -1 -5 194.04 29.46 0
 7 1 5 165.67 28.31 0
 -7 -1 -5 164.84 27.93 0
 7 -1 5 167.07 27.45 0
 7 1 5 188.48 29.18 0
 9 1 5 81.56 27.96 0
 -9 -1 -5 73.93 18.77 0
 9 1 5 71.79 26.81 0
 -9 -1 -5 89.37 28 0
 9 -1 5 69.75 25.6 0
 9 -1 5 84.08 25.23 0
 -9 1 -5 65.67 26.07 0
 -9 1 -5 70.86 27.05 0
 11 -1 5 374.65 23.91 0
 11 1 5 389.27 25.7 0
 -11 1 -5 369.32 23.54 0
 -11 -1 -5 385.5 24.58 0
 11 -1 5 410.94 24.42 0
 -11 -1 -5 402.01 25.35 0
 -11 1 -5 415.85 24.48 0
 11 1 5 369.63 24.94 0
 13 1 5 3.09 20.58 0
 -13 1 -5 -6.87 19.44 0
 13 -1 5 8.29 19.98 0
 -13 -1 -5 13.37 20.89 0
 -13 -1 -5 9.22 19.28 0
 -13 1 -5 7.1 20.21 0
 13 1 5 0.9 19.08 0
 13 -1 5 11.55 20.24 0
 15 1 5 98.75 19.85 0
 -15 1 -5 98.29 19.92 0
 -15 -1 -5 92.24 20.27 0
 -15 -1 -5 76.98 14.34 0
 15 -1 5 94.58 19.29 0
 15 -1 5 90.33 19.75 0
 -15 1 -5 84.43 19.58 0
 15 1 5 82.69 19.65 0
 17 1 5 23.49 13.18 0
 17 -1 5 20.21 19.45 0
 -17 1 -5 21.28 18.91 0
 17 1 5 21.26 18.13 0
 -17 -1 -5 42.22 19.42 0
 -17 1 -5 25.43 19.67 0
 17 -1 5 21.75 18.85 0
 -17 -1 -5 27.75 18.27 0
 19 1 5 -2.91 18.2 0
 19 -1 5 8.61 17.83 0
 -19 -1 -5 5 18.55 0
 -19 -1 -5 2.39 17.77 0
 -19 1 -5 -7.32 17.44 0
 -19 1 -5 14.9 18.51 0
 19 1 5 16.8 17.84 0
 19 -1 5 14.5 17.89 0
 -21 1 -5 22.66 17.01 0
 21 1 5 32.18 17.29 0
 21 1 5 7.11 16.55 0
 -21 -1 -5 28.69 12.03 0
 -21 1 -5 23.62 18.4 0
 21 -1 5 24.73 17.43 0
 21 -1 5 21 16.6 0
 -21 -1 -5 14.04 12.24 0
 23 1 5 20.95 15.81 0
 23 -1 5 37.81 15.92 0
 -23 -1 -5 18.35 17.22 0
 -23 1 -5 43.76 16.84 0
 -23 -1 -5 29.98 17.27 0
 -23 1 -5 16.42 15.84 0
 23 -1 5 33.25 16.36 0
 23 1 5 16.74 17.42 0
 25 -1 5 23.67 15.49 0
 -25 -1 -5 41.89 17.58 0
 -25 1 -5 47.96 17.54 0
 25 -1 5 20.75 11.67 0
 -25 -1 -5 23.78 16.06 0
 -25 1 -5 17.15 15.16 0
 25 1 5 31.47 16.37 0
 25 1 5 24 17.34 0
 -27 1 -5 24.16 11.81 0
 27 1 5 25 15.03 0
 -27 -1 -5 44.37 14.82 0
 -27 -1 -5 27.77 15.97 0
 -27 1 -5 30.47 14.78 0
 27 -1 5 17.49 11.79 0
 27 1 5 33.34 15.38 0
 27 -1 5 39.61 15.55 0
 -29 -1 -5 13.99 14.15 0
 29 -1 5 -13.69 14.33 0
 -29 1 -5 11.77 14.7 0
 -29 -1 -5 24.97 15.34 0
 -29 1 -5 6.24 14.94 0
 29 -1 5 4.31 14.47 0
 29 1 5 3.27 15.64 0
 29 1 5 20.3 15.61 0
 -31 1 -5 10.45 10.4 0
 -31 1 -5 14.88 14.33 0
 -31 -1 -5 20.66 13.31 0
 -31 -1 -5 15.72 15.21 0
 31 1 5 15.64 14.73 0
 31 -1 5 17.88 14.98 0
 31 -1 5 26.17 15.15 0
 31 1 5 6.16 10.36 0
 -33 -1 -5 4.82 14.16 0
 33 -1 5 -2.5 10.5 0
 -33 -1 -5 18.25 15.31 0
 -33 1 -5 17.88 14.65 0
 33 1 5 -2.17 14.69 0
 -33 1 -5 -2.18 13.97 0
 33 1 5 15.22 14.51 0
 33 -1 5 -4.39 14.31 0
 -38 -2 5 35.42 10.71 0
 38 2 -5 35.64 10.07 0
 -38 -2 5 39.75 14.39 0
 -38 2 5 20.07 16.73 0
 38 2 -5 13.76 10.65 0
 -38 2 5 48.07 14.17 0
 38 -2 -5 33.4 15.83 0
 38 -2 -5 40.87 14.13 0
 -36 2 5 3.11 16.6 0
 -36 2 5 18.08 14.98 0
 36 -2 -5 10.68 14.79 0
 -36 -2 5 13.04 14.72 0
 36 2 -5 19.03 14.93 0
 -36 -2 5 13.43 14.83 0
 36 -2 -5 9.34 14.93 0
 36 2 -5 5.24 14.81 0
 34 2 -5 2.11 15.46 0
 -34 -2 5 -5.29 15.72 0
 -34 2 5 3.92 15.47 0
 -34 -2 5 -0.5 15.75 0
 -34 2 5 -2.59 15.97 0
 34 -2 -5 5.21 15.19 0
 34 -2 -5 -7.96 15.35 0
 34 2 -5 4.49 10.21 0
 -32 -2 5 226.85 12.42 0
 32 2 -5 248.45 15.45 0
 -32 2 5 227.8 17.64 0
 -32 -2 5 241.7 17.04 0
 32 -2 -5 214.3 17.79 0
 32 2 -5 231.79 15.99 0
 32 -2 -5 196.28 16.87 0
 -32 2 5 244.61 18.38 0
 30 2 -5 6.07 16.62 0
 30 -2 -5 7.51 15.83 0
 -30 -2 5 0.99 11.87 0
 30 2 -5 -0.82 16.25 0
 -30 2 5 10.06 20.59 0
 -30 2 5 -8.84 16.01 0
 30 -2 -5 0.88 16.26 0
 -30 -2 5 -7.08 16.91 0
 -28 2 5 -0.89 17.14 0
 28 -2 -5 6.74 17.29 0
 28 2 -5 14.64 16.11 0
 28 2 -5 20.14 16.78 0
 -28 -2 5 11.24 12.54 0
 28 -2 -5 5.41 17.18 0
 -28 2 5 -10.43 16.63 0
 -28 -2 5 7.73 12.37 0
 -26 2 5 17.7 18.84 0
 -26 -2 5 15.48 17.28 0
 26 2 -5 18.61 16.65 0
 -26 -2 5 2.44 11.5 0
 -26 2 5 14.6 17.53 0
 26 -2 -5 8.17 17.68 0
 26 2 -5 6.44 16.46 0
 26 -2 -5 11.6 17.06 0
 24 2 -5 12.94 17.69 0
 24 2 -5 7.51 12.34 0
 -24 2 5 25.65 18.53 0
 24 -2 -5 -1.86 17.93 0
 -24 -2 5 -4.81 17.74 0
 24 -2 -5 19.18 17.63 0
 -24 2 5 9.87 18.01 0
 -24 -2 5 12.78 17.91 0
 -22 2 5 305.13 19.75 0
 -22 2 5 300.21 19.37 0
 -22 -2 5 279.71 14.8 0
 22 2 -5 275.12 19.34 0
 22 -2 -5 254.21 18.86 0
 -22 -2 5 328.59 21.13 0
 22 2 -5 301.44 20.06 0
 22 -2 -5 285.89 19.07 0
 -20 2 5 11.99 18.49 0
 20 -2 -5 23.27 18.54 0
 -20 -2 5 28.73 18.69 0
 -20 -2 5 16.87 18.93 0
 20 -2 -5 18.61 17.66 0
 20 2 -5 34.45 13.46 0
 20 2 -5 17.96 17.95 0
 -20 2 5 33 18.67 0
 18 2 -5 149.3 14.4 0
 -18 2 5 141.4 20.23 0
 18 2 -5 148.58 19.21 0
 18 -2 -5 148.96 20.8 0
 18 -2 -5 130.71 18.94 0
 -18 2 5 158.23 24.41 0
 -18 -2 5 150.07 14.61 0
 -18 -2 5 157.26 19.65 0
 -16 2 5 1406.05 33.86 0
 16 2 -5 1336.28 27.57 0
 16 -2 -5 1213.37 32.75 0
 -16 2 5 1299.84 29.39 0
 -16 -2 5 1280.12 27.05 0
 16 -2 -5 1325.31 29.36 0
 16 2 -5 1383.64 27.45 0
 -16 -2 5 1401.74 27.19 0
 -14 -2 5 6.37 24.48 0
 -14 -2 5 0.72 25.28 0
 14 -2 -5 -0.34 21.75 0
 -14 2 5 3.4 27.59 0
 14 2 -5 7.87 24.79 0
 14 2 -5 8.26 17.73 0
 14 -2 -5 1.89 27.42 0
 -14 2 5 7.16 22.89 0
 -12 -2 5 149.22 28.05 0
 -12 2 5 157.35 26.63 0
 12 2 -5 179.64 28.53 0
 -12 -2 5 179.93 27.9 0
 -12 2 5 145.63 30.9 0
 12 -2 -5 151.25 31.92 0
 12 2 -5 154.38 20.66 0
 12 -2 -5 164.64 31.74 0
 -10 -2 5 379.28 28.25 0
 10 -2 -5 348.57 30.76 0
 10 2 -5 373.77 28.28 0
 -10 2 5 358.67 33.84 0
 10 2 -5 368.35 28.48 0
 10 -2 -5 323.4 32.83 0
 -10 2 5 331.68 25.52 0
 -10 -2 5 360.38 28.58 0
 -8 -2 5 19.33 25.8 0
 8 -2 -5 14.04 22.7 0
 8 -2 -5 16.58 23.72 0
 -8 2 5 17.57 23.64 0
 -8 2 5 16.76 27.92 0
 -8 -2 5 6.42 25.67 0
 8 2 -5 23.31 26.08 0
 8 2 -5 17.86 18.72 0
 6 -2 -5 1366.03 40.05 0
 -6 -2 5 1476.41 28.52 0
 6 -2 -5 1312.91 35.51 0
 6 2 -5 1424.05 34.2 0
 -6 2 5 1385.38 36.52 0
 -6 2 5 1343.08 36.24 0
 -6 -2 5 1470.85 34.56 0
 4 -2 -5 252.69 27.46 0
 -4 2 5 273 26.67 0
 -4 -2 5 263.26 27.12 0
 -4 -2 5 268.74 28.27 0
 -4 2 5 265.54 28 0
 4 2 -5 269.68 28.33 0
 4 2 -5 265.85 27 0
 4 -2 -5 253.37 27.21 0
 2 2 -5 413.34 21.73 0
 2 -2 -5 418.8 29.91 0
 2 -2 -5 447.7 30.35 0
 -2 2 5 412.01 30.39 0
 -2 -2 5 421.93 28.72 0
 -2 -2 5 433.55 28.41 0
 2 2 -5 444.2 28.93 0
 -2 2 5 417.68 28.98 0
 0 2 5 2367.31 40.92 0
 0 -2 5 2489.18 39.25 0
 0 -2 5 2545.19 39.15 0
 0 2 -5 2342.8 38.11 0
 0 2 5 2486.21 42.68 0
 0 -2 -5 2495.04 41.43 0
 0 2 -5 2522.89 39.36 0
 0 -2 -5 2320.74 41.44 0
 -2 2 -5 38.23 25.2 0
 -2 -2 -5 32.77 27.36 0
 2 -2 5 41.91 25.2 0
 -2 2 -5 29.01 25.86 0
 2 2 5 31.44 28.7 0
 -2 -2 -5 30.83 27.25 0
 2 -2 5 40.04 25.98 0
 2 2 5 25.54 26.59 0
 -4 2 -5 335.12 27.59 0
 4 -2 5 340.46 27.42 0
 4 2 5 337.45 29.16 0
 -4 2 -5 309.46 26.28 0
 4 2 5 305.21 28.26 0
 -4 -2 -5 304.94 28.95 0
 4 -2 5 342.76 27.62 0
 -4 -2 -5 346.34 28.77 0
 -6 -2 -5 221.3 28.11 0
 6 2 5 221.6 29.55 0
 6 -2 5 253.76 26.98 0
 -6 2 -5 224.78 27.35 0
 6 2 5 211.89 28.08 0
 6 -2 5 220.57 26.09 0
 -6 2 -5 224.17 26.65 0
 -6 -2 -5 265.99 29.23 0
 8 2 5 14.78 25.84 0
 -8 2 -5 1.95 24.29 0
 -8 -2 -5 12.92 26.45 0
 8 -2 5 -3.52 16.76 0
 -8 -2 -5 -0.22 18.03 0
 8 2 5 -2.52 26.53 0
 -8 2 -5 -0.72 16.05 0
 8 -2 5 11.33 24.22 0
 10 2 5 718.11 26.93 0
 10 -2 5 704.63 25.05 0
 -10 -2 -5 723.43 26.69 0
 10 2 5 630.9 25.11 0
 -10 2 -5 628.48 23.44 0
 -10 -2 -5 637.46 25.67 0
 10 -2 5 626 24.76 0
 -10 2 -5 704.59 25.49 0
 -12 -2 -5 208.41 15.87 0
 12 2 5 198.7 21.48 0
 12 -2 5 214.52 21.59 0
 -12 -2 -5 183.2 15.41 0
 12 2 5 174.92 20.43 0
 12 -2 5 174.11 20.94 0
 -12 2 -5 184.09 21.02 0
 -12 2 -5 197.51 21.05 0
 14 2 5 65.47 14.36 0
 14 -2 5 62.3 19.49 0
 -14 2 -5 68.93 19.18 0
 -14 -2 -5 58.08 14.03 0
 14 -2 5 76.39 19.98 0
 -14 -2 -5 70.34 20.22 0
 -14 2 -5 70.58 19.03 0
 14 2 5 61.35 13.77 0
 16 2 5 184.62 19.14 0
 16 -2 5 176.52 13.58 0
 -16 2 -5 214.64 18.64 0
 16 -2 5 166.04 18.8 0
 -16 -2 -5 181.91 14.59 0
 -16 2 -5 177.78 12.84 0
 16 2 5 223.47 19.53 0
 -16 -2 -5 213.08 20.04 0
 18 2 5 25.6 18.23 0
 18 -2 5 21.57 17.93 0
 -18 2 -5 15.64 17.58 0
 -18 2 -5 32.18 18.43 0
 -18 -2 -5 8.8 13.4 0
 -18 -2 -5 14.5 18.58 0
 18 -2 5 4.89 17.49 0
 18 2 5 20.01 18.98 0
 20 -2 5 28.13 18.43 0
 -20 2 -5 19.48 17.95 0
 -20 -2 -5 41.06 18.12 0
 -20 -2 -5 18.36 12.6 0
 20 2 5 24.47 18.99 0
 20 2 5 18.15 18.14 0
 -20 2 -5 21.38 17.89 0
 20 -2 5 32.12 17.91 0
 22 -2 5 114.24 17.55 0
 -22 -2 -5 100.29 18.08 0
 22 -2 5 85.04 17.46 0
 -22 2 -5 139.76 18.13 0
 22 2 5 108.78 12.81 0
 -22 -2 -5 110.8 16.92 0
 22 2 5 99.08 16.74 0
 -22 2 -5 103.6 17.26 0
 24 -2 5 36.46 16.2 0
 -24 2 -5 34.95 15.71 0
 -24 -2 -5 22.71 16.68 0
 24 -2 5 24.83 16.51 0
 -24 -2 -5 4.28 17.15 0
 -24 2 -5 14.7 16.48 0
 24 2 5 19.56 11.59 0
 24 2 5 33.65 16.32 0
 -26 2 -5 14.16 11.13 0
 -26 2 -5 18.11 17.22 0
 -26 -2 -5 -0.25 15.29 0
 -26 -2 -5 6.94 16.21 0
 26 -2 5 20.46 16.43 0
 26 2 5 -13.58 15.36 0
 26 2 5 11.41 16.09 0
 26 -2 5 12.04 15.94 0
 -28 2 -5 9.01 15.16 0
 -28 -2 -5 31.91 16.3 0
 28 -2 5 17.52 15.33 0
 28 2 5 36.42 15.7 0
 -28 2 -5 31.22 16.27 0
 28 2 5 40.15 15.84 0
 -28 -2 -5 20.4 14.94 0
 28 -2 5 24.25 15.45 0
 30 2 5 5.86 14.81 0
 -30 2 -5 25.78 14.03 0
 30 -2 5 21.67 14.93 0
 -30 2 -5 21.54 15.91 0
 -30 -2 -5 20.66 14.97 0
 -30 -2 -5 17.72 14.4 0
 30 -2 5 7.47 15.2 0
 30 2 5 4.69 10.4 0
 -32 -2 -5 0.6 15.39 0
 -32 -2 -5 18.16 14.72 0
 32 -2 5 10.82 14.85 0
 32 -2 5 20.98 15.14 0
 32 2 5 10.57 14.44 0
 -32 2 -5 3.6 14.67 0
 -32 2 -5 -1.82 11.14 0
 32 2 5 4.07 15.05 0
 37 3 -5 29.97 10.17 0
 -37 3 5 32.05 15.57 0
 37 3 -5 21.24 15.12 0
 37 -3 -5 15.62 15.01 0
 -37 3 5 37.53 15.5 0
 -37 -3 5 44.64 15.09 0
 -37 -3 5 52.76 14.59 0
 37 -3 -5 42.57 15.63 0
 -35 -3 5 103.55 15.23 0
 35 3 -5 94.94 15.1 0
 -35 3 5 95.88 15.66 0
 -35 -3 5 127.11 15.81 0
 -35 3 5 117.11 17.02 0
 35 3 -5 101.15 15.78 0
 35 -3 -5 100.89 15.86 0
 35 -3 -5 88.34 15.63 0
 33 3 -5 18.64 10.92 0
 -33 -3 5 34.21 16.04 0
 -33 3 5 19.34 16.35 0
 33 3 -5 31.98 15.03 0
 -33 -3 5 8.15 10.95 0
 33 -3 -5 0.91 16 0
 33 -3 -5 26.54 15.44 0
 -33 3 5 13.65 15.42 0
 -31 3 5 1.56 16.68 0
 31 3 -5 26.85 15.39 0
 31 -3 -5 12.61 15.84 0
 -31 3 5 11.89 15.35 0
 31 3 -5 -0.81 15.07 0
 -31 -3 5 18.5 15.81 0
 31 -3 -5 16.47 15.35 0
 -31 -3 5 18 16.11 0
 29 -3 -5 71.18 16.79 0
 -29 -3 5 76.15 17.7 0
 -29 -3 5 65.17 12.27 0
 -29 3 5 87.95 17.51 0
 -29 3 5 71.41 16.64 0
 29 3 -5 75.56 17.17 0
 29 3 -5 63.97 17.63 0
 29 -3 -5 64.84 16.65 0
 -27 -3 5 14.89 17.16 0
 27 -3 -5 9.69 16.02 0
 -27 3 5 24.01 20.93 0
 27 3 -5 1.05 17.28 0
 -27 3 5 5.46 16.8 0
 -27 -3 5 -5.85 12.48 0
 27 3 -5 0.29 17.15 0
 27 -3 -5 5.11 20.9 0
 -25 3 5 398.65 20.17 0
 25 -3 -5 356.39 18.9 0
 -25 -3 5 347.77 18.57 0
 -25 3 5 356.51 19.32 0
 25 3 -5 348.55 18.37 0
 -25 -3 5 385.68 18.63 0
 25 -3 -5 323.42 19.42 0
 25 3 -5 346.24 18.31 0
 -23 3 5 6.31 19.83 0
 23 3 -5 -10.9 18.49 0
 23 3 -5 14.19 17.88 0
 23 -3 -5 -10.73 18.91 0
 -23 3 5 11.78 19.06 0
 -23 -3 5 19.98 18.02 0
 23 -3 -5 9.1 18.67 0
 -23 -3 5 0.34 18.37 0
 -21 3 5 -0.39 22.59 0
 -21 3 5 14.87 18.85 0
 21 -3 -5 2.81 21.99 0
 21 3 -5 7.24 18.32 0
 21 3 -5 6.78 17.6 0
 -21 -3 5 10.97 18.47 0
 21 -3 -5 23.21 18.15 0
 -21 -3 5 7.25 18.17 0
 -19 -3 5 89.24 18.91 0
 -19 3 5 93.24 20.38 0
 -19 -3 5 89.59 19.12 0
 19 3 -5 76.75 19.2 0
 19 -3 -5 69.78 19.14 0
 19 3 -5 59.67 18.67 0
 19 -3 -5 74.76 19.89 0
 -19 3 5 73.53 19.81 0
 -17 3 5 57.72 20.46 0
 17 3 -5 62.39 19.44 0
 -17 3 5 74.15 26.12 0
 17 -3 -5 60.62 20.59 0
 17 3 -5 81.8 19.07 0
 17 -3 -5 53.81 25.19 0
 -17 -3 5 92.15 19.25 0
 -17 -3 5 85.92 18.88 0
 15 3 -5 130.39 21.03 0
 -15 3 5 110.37 22.56 0
 -15 -3 5 86.35 20.81 0
 -15 -3 5 104.43 15.07 0
 15 -3 -5 107.31 25.8 0
 15 3 -5 88.61 21.25 0
 -15 3 5 104.28 26.73 0
 15 -3 -5 97.22 27.18 0
 13 3 -5 355.47 24.71 0
 -13 -3 5 378.64 24.31 0
 -13 3 5 409.09 32.07 0
 13 -3 -5 393.36 29.98 0
 13 3 -5 383.34 24.59 0
 13 -3 -5 345.95 31.41 0
 -13 -3 5 381.15 24.5 0
 -11 3 5 67.34 29.26 0
 11 3 -5 77.97 25.13 0
 11 -3 -5 60.29 29.77 0
 -11 -3 5 76.85 24.55 0
 -11 -3 5 65.2 26.08 0
 11 -3 -5 65.63 32.78 0
 -11 3 5 77.26 31.27 0
 11 3 -5 67.05 18.39 0
 -9 -3 5 475.93 28.79 0
 9 -3 -5 456.04 35.68 0
 -9 3 5 441.3 38.79 0
 9 -3 -5 433.82 36.45 0
 9 3 -5 460.5 28.52 0
 9 3 -5 479.87 27.87 0
 -9 3 5 494.35 36.97 0
 -9 -3 5 481.83 28.28 0
 7 3 -5 12.84 25.45 0
 7 3 -5 -9.63 25.34 0
 -7 -3 5 6.91 25.71 0
 -7 -3 5 5.46 26.02 0
 -7 3 5 7.84 30.39 0
 -7 3 5 6.63 35.04 0
 7 -3 -5 12.87 35.43 0
 5 -3 -5 38.37 30.64 0
 -5 3 5 41.21 28.61 0
 5 3 -5 31.83 24.44 0
 5 -3 -5 31.78 28.67 0
 -5 -3 5 38.11 25.17 0
 -5 -3 5 35.31 24.98 0
 -5 3 5 40.17 29.59 0
 3 3 -5 5.26 24.02 0
 -3 -3 5 -14.26 24.45 0
 3 -3 -5 -6.67 26.82 0
 -3 -3 5 -10.24 24.12 0
 -3 3 5 -10.16 28.84 0
 3 3 -5 -1.23 24.42 0
 -3 3 5 1.27 26.07 0
 3 -3 -5 -6.07 28.15 0
 1 3 -5 77.15 24.69 0
 -1 3 5 84.41 25.58 0
 1 3 -5 95.04 23.93 0
 -1 -3 5 82.79 24.48 0
 -1 3 5 89.07 32.04 0
 -1 -3 5 88.57 24.37 0
 1 -3 -5 100.32 29.6 0
 1 -3 -5 80.5 24.32 0
 -1 3 -5 521.92 26.74 0
 -1 3 -5 547.19 27.96 0
 1 -3 5 525.07 27.14 0
 1 -3 5 545.51 27.98 0
 1 3 5 539.14 31.51 0
 -1 -3 -5 478.77 29.4 0
 -1 -3 -5 524.6 34.94 0
 1 3 5 492.02 28.05 0
 -3 3 -5 1151.07 30.66 0
 3 -3 5 1139.71 30.6 0
 3 3 5 1179.54 34.18 0
 -3 -3 -5 1051.17 32.78 0
 3 -3 5 1170.55 31.29 0
 -3 -3 -5 1191.99 33.55 0
 -3 3 -5 1191.49 31.45 0
 3 3 5 1061.7 31.76 0
 5 3 5 267.99 27.27 0
 5 -3 5 230.27 25.14 0
 -5 3 -5 246.49 26.06 0
 5 -3 5 243.36 25.9 0
 -5 -3 -5 245.37 26.49 0
 -5 -3 -5 248.55 27.3 0
 5 3 5 234.36 25.99 0
 -5 3 -5 225.07 24.94 0
 7 3 5 186.59 24.56 0
 -7 3 -5 188.28 22.73 0
 7 -3 5 173.63 22.77 0
 -7 -3 -5 158.09 24.29 0
 7 3 5 151.67 23.42 0
 -7 3 -5 161.65 21.81 0
 7 -3 5 153.77 22.4 0
 -7 -3 -5 155.85 23.82 0
 9 -3 5 -4.24 21.04 0
 -9 3 -5 11.45 21.96 0
 9 3 5 5.11 22.03 0
 -9 -3 -5 1.4 14.75 0
 -9 -3 -5 8.85 22.17 0
 9 -3 5 6.4 21.11 0
 9 3 5 6.27 21.2 0
 -9 3 -5 4 20.7 0
 11 3 5 94.79 21.06 0
 11 -3 5 97.57 19.29 0
 -11 -3 -5 109.97 21 0
 -11 -3 -5 93.06 21.04 0
 11 -3 5 97.37 19.27 0
 -11 3 -5 113.2 20.19 0
 -11 3 -5 85.99 18.51 0
 11 3 5 71.37 19.87 0
 13 -3 5 13.21 18.09 0
 -13 3 -5 5.15 18 0
 -13 -3 -5 4.11 19.95 0
 -13 3 -5 6 17.07 0
 -13 -3 -5 19.46 20.38 0
 13 3 5 27.74 18.98 0
 13 3 5 27.91 18.87 0
 13 -3 5 16.88 17.69 0
 15 -3 5 -1.48 16.42 0
 15 3 5 11.12 19.2 0
 -15 -3 -5 -3.37 18.38 0
 -15 3 -5 8.02 16.43 0
 15 -3 5 10.64 16.65 0
 -15 -3 -5 1.86 19.14 0
 -15 3 -5 -13.58 17.16 0
 15 3 5 -2.04 12.57 0
 -17 3 -5 39.32 16.88 0
 17 -3 5 46.19 17.76 0
 -17 -3 -5 25.79 17.99 0
 17 3 5 17.3 17.95 0
 -17 -3 -5 49.18 18.65 0
 -17 3 -5 22.14 18.47 0
 17 -3 5 37.22 13.46 0
 17 3 5 48.01 19.08 0
 19 3 5 265.46 19.58 0
 19 -3 5 250.81 18.72 0
 -19 3 -5 268.81 20.17 0
 -19 -3 -5 266.99 19.38 0
 -19 3 -5 246.84 18.66 0
 -19 -3 -5 256.44 18.45 0
 19 -3 5 224.96 19.38 0
 19 3 5 245.02 17.84 0
 -21 3 -5 55.19 17.91 0
 21 -3 5 56.15 16.81 0
 21 3 5 51.92 17.38 0
 -21 -3 -5 56.59 16.85 0
 -21 -3 -5 73.97 17.55 0
 -21 3 -5 50.33 17.04 0
 21 -3 5 33.59 18.03 0
 21 3 5 45.77 16.33 0
 23 -3 5 38.43 17.43 0
 23 3 5 25.43 16.8 0
 -23 3 -5 21.72 16.98 0
 -23 -3 -5 41.02 17.25 0
 -23 -3 -5 45.99 16.73 0
 23 -3 5 37.03 17.02 0
 -23 3 -5 51.16 17.41 0
 23 3 5 42.8 17.01 0
 25 3 5 52.79 16.26 0
 -25 3 -5 72.09 17.48 0
 -25 -3 -5 76.03 16.26 0
 25 3 5 43.13 15.75 0
 -25 -3 -5 45.54 15.81 0
 -25 3 -5 70.93 19.85 0
 25 -3 5 50.65 17.31 0
 25 -3 5 49.41 16.36 0
 -27 -3 -5 5.13 15.11 0
 -27 3 -5 26.53 15.8 0
 27 3 5 6.57 15.61 0
 -27 -3 -5 -2.39 16.05 0
 -27 3 -5 8.14 15.85 0
 27 -3 5 13.99 15.72 0
 27 3 5 -17.95 15.83 0
 27 -3 5 7.77 16.41 0
 -29 -3 -5 18.76 15.19 0
 29 3 5 -5.19 15.02 0
 29 -3 5 21.52 16.34 0
 -29 3 -5 20.26 15.15 0
 -29 -3 -5 20.79 10.94 0
 29 3 5 20.51 15.11 0
 -29 3 -5 4.22 10.81 0
 29 -3 5 -8.27 14.98 0
 -31 3 -5 25.97 14.74 0
 31 -3 5 11.26 15.6 0
 -31 -3 -5 2.98 16.09 0
 31 3 5 24.97 14.82 0
 -31 -3 -5 0.65 14.92 0
 31 3 5 -6.86 15.35 0
 31 -3 5 16.1 15.67 0
 -31 3 -5 29.2 15.62 0
 -33 3 -5 17.77 14.07 0
 -36 4 5 24.18 16.31 0
 -36 -4 5 19.76 15.33 0
 36 4 -5 24.38 10.24 0
 -36 -4 5 19.48 15.04 0
 -36 4 5 18.11 14.65 0
 36 -4 -5 23.23 18.82 0
 36 -4 -5 18.18 14.76 0
 36 4 -5 19.38 15.11 0
 -34 4 5 2.88 15.09 0
 -34 -4 5 17.37 15.38 0
 -34 4 5 15.39 15.9 0
 34 4 -5 -26.33 15.38 0
 34 4 -5 22.91 15.05 0
 34 -4 -5 6.04 15.52 0
 -34 -4 5 15.79 15.06 0
 34 -4 -5 4.81 14.78 0
 -32 -4 5 34.46 11.26 0
 32 -4 -5 28.83 16.21 0
 32 4 -5 33.67 15.32 0
 -32 4 5 31.13 16.66 0
 -32 4 5 22.84 15.75 0
 -32 -4 5 23.85 15.42 0
 32 4 -5 1.81 15.15 0
 32 -4 -5 0.89 15.98 0
 30 4 -5 27.61 15.39 0
 -30 4 5 24.61 21.54 0
 -30 4 5 19.99 16.27 0
 -30 -4 5 41.04 15.69 0
 -30 -4 5 16.39 15.85 0
 30 -4 -5 23.04 17.22 0
 30 4 -5 44.33 15.39 0
 30 -4 -5 14.05 19.75 0
 -28 -4 5 178.91 17.88 0
 -28 4 5 132.56 16.98 0
 -28 4 5 178.17 22.17 0
 28 -4 -5 154 17.63 0
 28 4 -5 141.69 12.74 0
 28 4 -5 145.7 17.74 0
 -28 -4 5 119.89 16.74 0
 28 -4 -5 130.04 20.63 0
 26 4 -5 95.23 17.5 0
 -26 -4 5 97.4 17.16 0
 -26 4 5 129.15 18.8 0
 26 4 -5 93.42 16.6 0
 -26 4 5 92.66 17.74 0
 -26 -4 5 117.25 17.69 0
 26 -4 -5 88.35 21 0
 26 -4 -5 91.4 21.01 0
 -24 -4 5 134.94 17.39 0
 24 -4 -5 143.4 22.38 0
 24 4 -5 132.62 17.01 0
 -24 4 5 147.28 19.3 0
 24 -4 -5 103.23 22.39 0
 24 4 -5 122.23 17.15 0
 -24 4 5 121.99 18.12 0
 -24 -4 5 163.02 17.59 0
 -22 -4 5 326.33 19.94 0
 22 4 -5 301.19 13.93 0
 -22 4 5 310.01 20.29 0
 -22 4 5 383.42 25.81 0
 -22 -4 5 356.16 19.13 0
 22 -4 -5 325.25 20.68 0
 22 4 -5 347.69 18.74 0
 22 -4 -5 301.14 25.04 0
 -20 4 5 20.52 23.77 0
 20 4 -5 19.58 18.02 0
 20 -4 -5 18.44 18.55 0
 20 4 -5 11.73 18.49 0
 -20 -4 5 36.04 18.23 0
 20 -4 -5 19.58 22.85 0
 -20 4 5 17.2 22.75 0
 -20 -4 5 20.39 18.47 0
 18 4 -5 160.23 19 0
 -18 -4 5 168.37 19.13 0
 -18 4 5 191.09 25.64 0
 18 -4 -5 178.44 24.15 0
 18 4 -5 166.18 18.84 0
 -18 4 5 156.77 24.07 0
 18 -4 -5 153.78 24.55 0
 -18 -4 5 180.27 19.77 0
 -16 4 5 684.81 30.88 0
 16 4 -5 587.47 21.16 0
 16 -4 -5 597.71 28.9 0
 -16 4 5 591.37 29.25 0
 -16 -4 5 587.82 21.66 0
 16 -4 -5 556.01 29.82 0
 -16 -4 5 635.34 16.81 0
 16 4 -5 610.93 16.95 0
 14 -4 -5 10.03 23.21 0
 14 -4 -5 0.44 29.24 0
 -14 4 5 4.53 27.94 0
 -14 -4 5 -1.13 18.71 0
 14 4 -5 2.81 19.09 0
 -14 -4 5 -2.94 19.12 0
 -14 4 5 9.3 26.11 0
 14 4 -5 -8.57 19.15 0
 -12 -4 5 161.21 15.53 0
 12 -4 -5 151.06 29.03 0
 12 4 -5 158.48 21.55 0
 12 -4 -5 170.34 30.57 0
 12 4 -5 167.69 21.64 0
 -12 4 5 192.23 29.38 0
 -12 -4 5 169.06 15.63 0
 -12 4 5 167.45 30.64 0
 10 -4 -5 829.46 43.21 0
 -10 4 5 884.51 43.56 0
 10 4 -5 801.6 25.6 0
 10 4 -5 838.27 25.71 0
 10 -4 -5 693.96 42.39 0
 -10 -4 5 872.26 24.74 0
 -10 -4 5 906.77 25.45 0
 -10 4 5 804.29 43.66 0
 8 -4 -5 0.88 42.78 0
 -8 -4 5 6.72 22.07 0
 8 4 -5 -2.69 21.85 0
 8 -4 -5 7.59 43.8 0
 -8 4 5 2.71 42.37 0
 -8 -4 5 -9.72 22.36 0
 -8 4 5 0.94 42.52 0
 8 4 -5 4.15 22.05 0
 6 4 -5 1091.38 23.2 0
 6 4 -5 1255.91 28.26 0
 -6 4 5 1182.78 57.14 0
 -6 -4 5 1269.85 29.6 0
 6 -4 -5 1073.89 51.31 0
 6 -4 -5 1165.27 55.64 0
 -6 -4 5 1271.07 28.64 0
 -6 4 5 1184.22 50.56 0
 -4 -4 5 37.62 23.59 0
 4 -4 -5 17.5 38.42 0
 -4 4 5 27.31 33.45 0
 -4 4 5 19.98 33.87 0
 4 4 -5 30.84 22.88 0
 4 4 -5 35.12 23.89 0
 4 -4 -5 24.13 35.24 0
 -4 -4 5 34.22 23.03 0
 -2 4 5 88.4 29.61 0
 2 4 -5 88.62 29.27 0
 2 4 -5 87.33 23.07 0
 2 -4 -5 74.82 31.03 0
 -2 -4 5 78.55 24.01 0
 -2 4 5 83.19 32.5 0
 -2 -4 5 66.37 23.69 0
 2 -4 -5 77.3 32.36 0
 0 4 5 2613.36 42.67 0
 0 4 -5 2724.67 35.61 0
 0 -4 5 2898.52 36.51 0
 0 -4 -5 2671.91 41.31 0
 0 -4 5 2757.8 36.32 0
 0 4 -5 2748.98 36.18 0
 0 -4 -5 2553.25 45.34 0
 0 4 5 2537.14 39.97 0
 -2 4 -5 7.33 20.86 0
 -2 -4 -5 0.07 24.45 0
 -2 4 -5 8.9 22.09 0
 2 -4 5 1.8 21.43 0
 2 4 5 3.72 28.28 0
 -2 -4 -5 4.22 24.03 0
 2 4 5 10.08 29.83 0
 2 -4 5 0.82 21.05 0
 4 4 5 66.14 23.25 0
 -4 4 -5 73.26 20.94 0
 4 -4 5 70.12 21.73 0
 4 -4 5 74.35 21.63 0
 -4 -4 -5 73.78 23.22 0
 -4 -4 -5 70.1 27.88 0
 4 4 5 71.49 21.9 0
 -4 4 -5 70.85 22.6 0
 6 -4 5 566.77 24.46 0
 -6 4 -5 605.09 25.28 0
 -6 -4 -5 652.07 29.73 0
 -6 4 -5 568.63 23.48 0
 6 4 5 566 23.98 0
 6 4 5 602.13 25.83 0
 6 -4 5 611.54 25 0
 -6 -4 -5 555.48 24.99 0
 8 -4 5 16.12 20.21 0
 -8 4 -5 28.24 20.74 0
 -8 -4 -5 17.71 20.98 0
 -8 -4 -5 9.78 20.75 0
 8 -4 5 22.28 23.95 0
 8 4 5 2.86 19.62 0
 8 4 5 10.14 21.25 0
 -8 4 -5 17.05 19.96 0
 10 -4 5 524.88 21.72 0
 10 4 5 604.46 23.32 0
 10 4 5 556.33 22.11 0
 -10 4 -5 611.79 23.25 0
 -10 4 -5 539.27 22.07 0
 -10 -4 -5 624.9 23.31 0
 -10 -4 -5 533.58 22.36 0
 10 -4 5 600.46 22.56 0
 -12 4 -5 208.83 20.04 0
 12 -4 5 189.93 19.17 0
 12 4 5 226.81 20.1 0
 12 -4 5 201.22 19.89 0
 -12 -4 -5 218.86 20.2 0
 12 4 5 182.62 20 0
 -12 4 -5 187.63 18.88 0
 -12 -4 -5 204.07 20.32 0
 14 4 5 23.47 18.79 0
 14 4 5 -6.55 19.56 0
 14 -4 5 13.6 18.49 0
 14 -4 5 9.55 16.98 0
 -14 4 -5 11.6 16.7 0
 -14 -4 -5 28.44 19.04 0
 -14 -4 -5 -1.54 19.09 0
 -14 4 -5 8.85 18.27 0
 -16 4 -5 473.24 19.94 0
 16 -4 5 475.29 20.48 0
 -16 -4 -5 551.13 20.71 0
 16 -4 5 434.73 19.65 0
 -16 -4 -5 464.74 15.65 0
 16 4 5 471.84 19.84 0
 -16 4 -5 538.01 21.27 0
 16 4 5 499.4 20.8 0
 18 4 5 -10.55 16.34 0
 -18 -4 -5 -4.08 11.99 0
 -18 4 -5 9.77 21.19 0
 -18 -4 -5 -1.92 16.9 0
 -18 4 -5 12.78 18.08 0
 18 -4 5 -12.65 17.07 0
 18 -4 5 -0.92 17.31 0
 18 4 5 11.24 18.21 0
 -20 4 -5 12.19 21.53 0
 -20 -4 -5 37 12.62 0
 20 -4 5 55.05 17.43 0
 20 4 5 44.84 18.22 0
 -20 4 -5 33.35 16.86 0
 20 4 5 29.3 16.05 0
 -20 -4 -5 40.84 16.79 0
 20 -4 5 35.73 16.82 0
 -22 -4 -5 131.36 16.99 0
 22 4 5 115.8 17.05 0
 -22 4 -5 131.48 17.03 0
 22 -4 5 143.35 16.77 0
 -22 -4 -5 159.7 18.09 0
 -22 4 -5 138.26 17.98 0
 22 4 5 126.91 18.57 0
 22 -4 5 123.28 17.04 0
 24 -4 5 -2.21 15.66 0
 -24 -4 -5 14.42 11.22 0
 24 4 5 21.74 16.85 0
 24 -4 5 28.17 15.48 0
 -24 -4 -5 31.09 16.62 0
 -24 4 -5 14.47 15.09 0
 -24 4 -5 19.22 16.69 0
 24 4 5 33.05 16.02 0
 26 4 5 0.55 15.49 0
 26 -4 5 12.18 16.03 0
 -26 -4 -5 19.57 16.02 0
 -26 -4 -5 5.82 15.25 0
 -26 4 -5 18.52 15.11 0
 -26 4 -5 26.79 16.88 0
 26 -4 5 29.28 16.08 0
 26 4 5 18.33 11.29 0
 -28 4 -5 39.22 15.09 0
 -28 -4 -5 49.67 16.2 0
 28 4 5 43.24 14.82 0
 -28 -4 -5 35.11 10.26 0
 28 -4 5 33.61 15.98 0
 28 -4 5 49.89 15.19 0
 28 4 5 36.42 15.26 0
 -28 4 -5 53.25 16.36 0
 -30 4 -5 16.31 15.14 0
 30 -4 5 13.08 15.21 0
 -30 4 -5 24.35 15.65 0
 -30 -4 -5 37.9 15.15 0
 30 -4 5 4.39 14.99 0
 30 4 5 31.09 15.09 0
 -30 -4 -5 13.08 14.68 0
 30 4 5 8.91 10.21 0
 -32 4 -5 26.97 16.31 0
 32 -4 5 11.73 15.41 0
 -32 4 -5 22.9 14.03 0
 -32 -4 -5 33.74 15.2 0
 -32 -4 -5 41.01 14.41 0
 32 4 5 25.79 14.7 0
 32 4 5 35.7 14.08 0
 32 -4 5 23.49 14.99 0
 -35 5 5 6.68 16.22 0
 -35 -5 5 -4.81 11.16 0
 -35 -5 5 12.78 14.83 0
 35 5 -5 9.57 14.75 0
 -35 5 5 18.66 15.16 0
 35 -5 -5 6.9 18.55 0
 35 5 -5 5.6 14.86 0
 35 -5 -5 7.71 15.42 0
 33 5 -5 50.81 15.04 0
 33 5 -5 67 15.14 0
 -33 -5 5 93.36 15.59 0
 -33 5 5 59.78 19.33 0
 -33 5 5 75.26 19.93 0
 33 -5 -5 68.75 16.78 0
 33 -5 -5 55.56 20.22 0
 -33 -5 5 79.48 15.18 0
 31 5 -5 13.77 15.05 0
 -31 -5 5 4.39 15.63 0
 31 -5 -5 12.84 16.41 0
 -31 -5 5 20.25 15.57 0
 -31 5 5 15.21 17.56 0
 31 -5 -5 12.09 16.94 0
 -31 5 5 21.95 16.35 0
 31 5 -5 8.09 11.14 0
 29 -5 -5 4.43 16.01 0
 29 5 -5 27.6 15.45 0
 -29 5 5 15.71 19.52 0
 -29 5 5 15.1 17.94 0
 -29 -5 5 19.12 11.33 0
 29 -5 -5 19.11 17.04 0
 29 5 -5 -2.32 15.14 0
 -29 -5 5 18.09 16.23 0
 -27 -5 5 441.19 14.44 0
 -27 -5 5 393.87 18.05 0
 -27 5 5 468.49 22.02 0
 27 5 -5 408.09 18.69 0
 27 5 -5 370.05 18.58 0
 27 -5 -5 424.86 23.76 0
 27 -5 -5 344.86 20.38 0
 -27 5 5 387.9 20.01 0
 25 -5 -5 -4.42 21.94 0
 -25 -5 5 28.94 16.89 0
 25 -5 -5 -0.53 21.95 0
 25 5 -5 20.74 11.79 0
 -25 5 5 6.89 23.7 0
 -25 -5 5 1.14 17.66 0
 25 5 -5 -4.16 17.43 0
 -25 5 5 6.74 21.45 0
 23 5 -5 14.25 15.83 0
 -23 5 5 26.05 24.12 0
 -23 5 5 3.07 23.13 0
 -23 -5 5 22.71 17.43 0
 23 5 -5 16.16 11.34 0
 -23 -5 5 13.34 16.2 0
 23 -5 -5 14.62 23.28 0
 23 -5 -5 16.14 22.92 0
 -21 -5 5 462.49 14.81 0
 -21 5 5 538.06 28.9 0
 -21 -5 5 437.18 18.96 0
 -21 5 5 418.89 22.73 0
 21 -5 -5 472.86 25.95 0
 21 5 -5 442.51 18.63 0
 21 5 -5 477.05 19.08 0
 21 -5 -5 400.29 27.09 0
 -19 -5 5 15.95 17.85 0
 19 5 -5 5.94 17.34 0
 -19 5 5 9.67 21.35 0
 -19 5 5 17.29 24 0
 -19 -5 5 10.88 18.16 0
 19 5 -5 5.31 17.63 0
 19 -5 -5 16.27 24.81 0
 19 -5 -5 9.11 22.54 0
 17 -5 -5 507.04 28.61 0
 -17 5 5 580.57 28.88 0
 17 5 -5 569.99 16.56 0
 -17 5 5 685.41 34.22 0
 17 5 -5 550.49 20.88 0
 17 -5 -5 576.7 30.7 0
 -17 -5 5 575.08 20.91 0
 -17 -5 5 653.2 21.43 0
 15 5 -5 13.18 18.39 0
 -15 5 5 1.76 30.07 0
 -15 -5 5 -4.6 18.25 0
 -15 5 5 -2.02 26.08 0
 -15 -5 5 1.18 18.4 0
 15 5 -5 8.71 13.53 0
 15 -5 -5 -2.67 28.2 0
 15 -5 -5 -4.33 26.91 0
 13 -5 -5 45.57 33.79 0
 13 -5 -5 37.38 35.16 0
 13 5 -5 53.22 18.66 0
 -13 5 5 58.45 42.47 0
 -13 -5 5 40.01 18.86 0
 -13 5 5 43.36 32.97 0
 13 5 -5 53.12 18.3 0
 -13 -5 5 62.71 19.78 0
 -11 -5 5 1436.96 25.76 0
 11 5 -5 1473.5 26.21 0
 11 5 -5 1393.49 26.27 0
 -11 -5 5 1508.29 26.45 0
 -9 -5 5 231.17 19.17 0
 9 5 -5 227.65 20.81 0
 -9 -5 5 219.67 20.05 0
 9 5 -5 206.13 21.43 0
 7 5 -5 123.75 20.74 0
 7 5 -5 145.32 19.61 0
 -7 -5 5 147.56 19.47 0
 -7 -5 5 147.47 20.44 0
 5 5 -5 1021.83 25.82 0
 -5 -5 5 1045.63 25.1 0
 -5 5 5 1023.11 47.32 0
 5 -5 -5 893.31 50.33 0
 5 5 -5 1059.94 25.52 0
 5 -5 -5 918.15 50.72 0
 -5 5 5 927.23 53.04 0
 -5 -5 5 1090.88 25.9 0
 3 -5 -5 116.06 31.22 0
 -3 -5 5 114.76 20.91 0
 3 5 -5 114.49 20.73 0
 3 5 -5 127.63 20.12 0
 3 -5 -5 102.21 32.31 0
 -3 5 5 114.38 32.59 0
 -3 -5 5 129.57 20.78 0
 -3 5 5 118.33 29.68 0
 1 5 -5 1076.25 26.15 0
 1 5 -5 1086.45 26.9 0
 1 -5 -5 976.12 35.24 0
 -1 -5 5 1074.77 26.47 0
 -1 5 5 1033.76 35.91 0
 -1 -5 5 1035.04 26.18 0
 -1 5 5 1062.29 34.64 0
 1 -5 -5 1116.81 34.8 0
 1 -5 5 330.09 21.81 0
 -1 5 -5 349.23 25.13 0
 1 5 5 346.18 28.83 0
 -1 -5 -5 353.34 29.49 0
 1 -5 5 364.13 26.19 0
 -1 5 -5 327.89 21.86 0
 1 5 5 330.54 25.3 0
 -1 -5 -5 308.83 29.75 0
 3 -5 5 46.76 19.77 0
 -3 5 -5 49.69 18.96 0
 3 5 5 53.28 26.02 0
 -3 -5 -5 54.04 25.66 0
 3 -5 5 40.53 19.77 0
 -3 -5 -5 46.67 21.26 0
 -3 5 -5 39.12 24.36 0
 3 5 5 40.01 22.48 0
 5 -5 5 583.43 23.17 0
 5 5 5 563.32 24.26 0
 5 -5 5 554.12 25.99 0
 -5 5 -5 515.69 22.46 0
 -5 -5 -5 581.1 24.01 0
 -5 -5 -5 509.49 23.48 0
 5 5 5 525.56 26.98 0
 -5 5 -5 573 26.55 0
 -7 -5 -5 373.68 20.65 0
 7 -5 5 422.58 21.9 0
 -7 -5 -5 457.18 25.34 0
 7 -5 5 381.59 21.46 0
 -7 5 -5 381.59 21.69 0
 -7 5 -5 402.43 21.99 0
 7 5 5 417.5 22.09 0
 7 5 5 367.17 21.51 0
 9 -5 5 17.57 21.99 0
 -9 -5 -5 28.49 17.5 0
 -9 5 -5 38.72 23.12 0
 -9 -5 -5 27.29 18.49 0
 9 5 5 22.58 18.06 0
 9 5 5 21.58 12.99 0
 -9 5 -5 35.66 18.73 0
 9 -5 5 21.49 18.72 0
 11 5 5 757.74 23.65 0
 11 -5 5 658.26 22.13 0
 -11 5 -5 761.44 23.62 0
 11 5 5 674.83 20.69 0
 -11 -5 -5 796.43 22.69 0
 11 -5 5 751.93 23.12 0
 -11 5 -5 711.14 25.4 0
 -11 -5 -5 661.28 20.83 0
 13 -5 5 95.69 17.76 0
 -13 5 -5 110.06 18.39 0
 -13 5 -5 98.22 18.08 0
 13 5 5 88.6 18.27 0
 -13 -5 -5 123.04 18.8 0
 13 5 5 88.1 18.81 0
 -13 -5 -5 107.21 18.17 0
 13 -5 5 112.94 17.88 0
 15 -5 5 138.8 18.9 0
 15 5 5 119.98 18.7 0
 15 -5 5 118.56 18.01 0
 15 5 5 156.15 18.43 0
 -15 5 -5 130.93 17.88 0
 -15 5 -5 166.12 19.25 0
 -15 -5 -5 136.26 18.51 0
 -15 -5 -5 175.32 18.88 0
 17 -5 5 215.72 18.75 0
 17 5 5 218.23 17.9 0
 17 -5 5 186.74 17.9 0
 -17 -5 -5 236.48 13.41 0
 -17 -5 -5 181.28 18.34 0
 17 5 5 212.12 17.35 0
 -17 5 -5 206.8 17.8 0
 -17 5 -5 265.02 18.68 0
 19 -5 5 0.35 15.67 0
 -19 5 -5 2.59 16.53 0
 -19 -5 -5 25.47 16.64 0
 -19 -5 -5 8.73 15.58 0
 19 -5 5 -0.41 16.72 0
 -19 5 -5 2.93 17.23 0
 19 5 5 16.19 16.37 0
 19 5 5 -0.08 15.89 0
 -21 5 -5 121.72 18.1 0
 21 5 5 127.29 17.25 0
 -21 -5 -5 135.31 16.96 0
 -21 -5 -5 107 15.43 0
 -21 5 -5 103.84 17.28 0
 21 5 5 108.8 17.37 0
 21 -5 5 107.19 17.28 0
 21 -5 5 113.31 17.61 0
 23 5 5 30.16 15.29 0
 -23 5 -5 34.51 15.51 0
 -23 -5 -5 56.69 15.48 0
 23 -5 5 41.74 16.33 0
 -23 -5 -5 39.15 15.22 0
 23 -5 5 39.93 16.23 0
 23 5 5 39.56 11.06 0
 -23 5 -5 44.73 16.14 0
 25 -5 5 22.21 16 0
 25 5 5 26.63 11.13 0
 25 5 5 21.24 14.85 0
 -25 -5 -5 46.67 15.55 0
 25 -5 5 25.13 15.59 0
 -25 5 -5 30.93 15.35 0
 -25 -5 -5 19.64 15.53 0
 -25 5 -5 12.88 16.48 0
 27 -5 5 108.11 16.06 0
 27 5 5 112.11 15.7 0
 -27 -5 -5 104.61 15.7 0
 -27 5 -5 111.39 17.22 0
 -27 -5 -5 102.68 16.4 0
 27 5 5 78.15 15.58 0
 27 -5 5 97.32 16.4 0
 -27 5 -5 98.49 16.15 0
 29 -5 5 10.39 15.74 0
 -29 -5 -5 15.3 14.87 0
 -29 5 -5 25.04 15.02 0
 -29 -5 -5 6.59 14.61 0
 29 5 5 31.67 14.41 0
 -29 5 -5 24.82 15.41 0
 29 5 5 23.11 15.21 0
 29 -5 5 16.86 14.42 0
 31 -5 5 15.45 14.46 0
 31 5 5 4.34 9.74 0
 31 5 5 22.51 14.55 0
 -34 -6 5 17.95 11.14 0
 34 6 -5 35.91 14.71 0
 -34 -6 5 49.31 15.22 0
 34 6 -5 31.22 14.83 0
 34 -6 -5 22.79 15.87 0
 -34 6 5 21.8 17.64 0
 -34 6 5 20.16 20.47 0
 34 -6 -5 26.34 19.2 0
 -32 -6 5 -1.64 14.82 0
 -32 6 5 16.87 20.97 0
 32 6 -5 27.17 14.69 0
 32 -6 -5 18.86 19.46 0
 -32 -6 5 22.18 14.42 0
 32 6 -5 4.76 14.4 0
 32 -6 -5 12.24 19.51 0
 -32 6 5 8.91 14.44 0
 30 6 -5 34.53 10.91 0
 30 -6 -5 40.92 20.86 0
 30 6 -5 55.98 15.42 0
 -30 -6 5 52.01 10.88 0
 30 -6 -5 64.38 20.02 0
 -30 6 5 41.29 19.56 0
 -30 6 5 62.29 22.14 0
 -30 -6 5 78.26 15.35 0
 -28 6 5 288.86 21.71 0
 28 -6 -5 263.37 23 0
 28 -6 -5 348.07 22.27 0
 -28 6 5 376.93 24.71 0
 28 6 -5 346.07 16.85 0
 -28 -6 5 293.1 16.91 0
 28 6 -5 322.7 16.3 0
 -28 -6 5 363.69 17.33 0
 -26 6 5 172.85 23.01 0
 -26 -6 5 188.48 16.91 0
 26 6 -5 145.01 11.6 0
 26 -6 -5 155.57 21.78 0
 26 6 -5 179.65 16.72 0
 26 -6 -5 138.57 22.1 0
 -26 -6 5 152.9 16.05 0
 -26 6 5 138.35 21 0
 24 -6 -5 13.44 21.36 0
 24 6 -5 -3.47 16.4 0
 -24 -6 5 -7.8 15.39 0
 24 -6 -5 1.46 19.86 0
 24 6 -5 7.43 15.76 0
 -24 6 5 6.85 20.26 0
 -24 6 5 3.26 22.4 0
 -24 -6 5 7.05 16.63 0
 22 -6 -5 186.87 26.74 0
 22 6 -5 179.73 17.01 0
 -22 6 5 199.66 28.67 0
 22 -6 -5 153.83 27.26 0
 22 6 -5 174.59 16.49 0
 -22 -6 5 171.81 15.93 0
 -22 -6 5 205.31 16.81 0
 -20 6 5 94.6 27.52 0
 20 6 -5 97.48 17.35 0
 20 -6 -5 90.41 28.79 0
 -20 -6 5 86.57 16.69 0
 -20 6 5 85.78 26.5 0
 20 6 -5 85.93 16.76 0
 20 -6 -5 75.91 26.28 0
 -20 -6 5 85.4 17.44 0
 -18 6 5 66.18 29.51 0
 -18 -6 5 73.11 17.13 0
 18 -6 -5 78.87 32.2 0
 -18 -6 5 82.17 18.21 0
 18 6 -5 85.28 17.29 0
 18 6 -5 64.55 13.19 0
 18 -6 -5 60.61 29.94 0
 -18 6 5 81.51 31.32 0
 16 6 -5 491.17 20.02 0
 16 6 -5 438.88 19.77 0
 -16 -6 5 515.24 19.99 0
 -16 -6 5 455.61 19.9 0
 14 6 -5 153.93 18.13 0
 14 6 -5 145.2 18.03 0
 -14 -6 5 152.89 18.39 0
 -14 -6 5 138.27 17.75 0
 12 6 -5 810.71 22.41 0
 12 6 -5 811.86 21.56 0
 -12 -6 5 850.56 20.52 0
 -12 -6 5 865.39 22.14 0
 -10 -6 5 1432.52 24.49 0
 10 6 -5 1416.11 24.95 0
 10 6 -5 1468.03 24.78 0
 -10 -6 5 1390.67 24.03 0
 -8 -6 5 62.14 17.28 0
 8 6 -5 74.49 16.93 0
 8 6 -5 51.71 13.52 0
 -8 -6 5 55.13 16.69 0
 6 6 -5 844.05 22.69 0
 6 6 -5 814.87 24.02 0
 -6 -6 5 839.97 25.86 0
 -6 -6 5 871.72 23.1 0
 4 6 -5 127.83 24.41 0
 -4 6 5 128.62 30.71 0
 4 6 -5 141.21 18.31 0
 4 -6 -5 127.86 35.52 0
 -4 -6 5 127.92 19.53 0
 -4 6 5 117.01 35.39 0
 4 -6 -5 113.38 33.13 0
 -4 -6 5 134.27 19.93 0
 -2 6 5 4.65 28.57 0
 2 6 -5 8.81 22.07 0
 2 -6 -5 11.72 25.84 0
 -2 -6 5 20.29 23.53 0
 -2 6 5 10.47 28.09 0
 2 6 -5 0.74 18.83 0
 2 -6 -5 2.93 24.14 0
 -2 -6 5 6.65 18.12 0
 0 -6 5 1567.39 31.29 0
 0 -6 -5 1521.21 35.7 0
 0 6 -5 1411.11 27.25 0
 0 -6 5 1494.66 28.65 0
 0 6 5 1531.67 39.28 0
 0 -6 -5 1358.55 34.54 0
 0 6 5 1477.86 34.94 0
 -2 6 -5 92.33 18.23 0
 -2 -6 -5 68.91 24.79 0
 -2 6 -5 97.65 23.98 0
 2 -6 5 94.96 20.27 0
 2 6 5 97.72 25.58 0
 2 -6 5 95.01 23.64 0
 -2 -6 -5 84.7 25.03 0
 2 6 5 87.06 25.74 0
 -4 6 -5 481.74 22.03 0
 -4 6 -5 483.18 26.28 0
 4 -6 5 493.19 21.65 0
 -4 -6 -5 430.71 25.73 0
 -4 -6 -5 507.41 26.83 0
 4 -6 5 455.83 25.54 0
 4 6 5 461.68 23.3 0
 4 6 5 487.21 23.22 0
 -6 -6 -5 646.86 22.14 0
 6 -6 5 709.41 26.77 0
 -6 -6 -5 785.6 23.43 0
 6 6 5 756.76 23.38 0
 6 -6 5 758.41 23.72 0
 -6 6 -5 755.32 27.06 0
 -6 6 -5 694.88 23.38 0
 6 6 5 707.04 26.28 0
 -8 6 -5 8.53 22.14 0
 8 -6 5 12.5 21.31 0
 8 -6 5 13.55 18.26 0
 -8 -6 -5 10.29 18.1 0
 -8 -6 -5 14.89 17.47 0
 8 6 5 18.57 18.64 0
 8 6 5 21.31 18.53 0
 -8 6 -5 17.4 21.56 0
 10 -6 5 925.46 27.03 0
 -10 -6 -5 1034.21 23.79 0
 10 -6 5 1003.45 28.61 0
 10 6 5 899.7 22.56 0
 10 6 5 975.18 23.39 0
 -10 -6 -5 891.98 22.48 0
 -10 6 -5 891.55 23.95 0
 -10 6 -5 963.38 24.62 0
 -12 6 -5 81.59 18.96 0
 12 -6 5 65.91 17.76 0
 12 -6 5 79.77 22.33 0
 -12 -6 -5 89.81 17.89 0
 -12 -6 -5 101.05 18.69 0
 -12 6 -5 73.71 21.65 0
 12 6 5 65.5 18.08 0
 12 6 5 71.15 18.84 0
 14 -6 5 9.63 19.62 0
 14 -6 5 8.83 21.77 0
 -14 6 -5 11.59 20.94 0
 -14 6 -5 10.8 16.31 0
 -14 -6 -5 24.64 17.2 0
 14 6 5 11.89 17.55 0
 14 6 5 1.7 18.52 0
 -14 -6 -5 12.44 17.79 0
 -16 -6 -5 315.49 20.06 0
 16 -6 5 260.19 18.34 0
 16 -6 5 282.22 19.59 0
 -16 -6 -5 265.32 17.15 0
 -16 6 -5 279.83 18.64 0
 16 6 5 267.55 18.88 0
 16 6 5 269.61 18.45 0
 -16 6 -5 299.69 18.99 0
 18 -6 5 85.32 16.62 0
 -18 6 -5 91.86 16.84 0
 18 -6 5 101.76 18.1 0
 -18 -6 -5 112.94 17.52 0
 -18 6 -5 111.09 17.42 0
 18 6 5 102.67 12.57 0
 -18 -6 -5 95.19 12.52 0
 18 6 5 118.61 17.34 0
 20 -6 5 19.89 16.52 0
 20 -6 5 33.97 20.52 0
 -20 6 -5 22.03 20.73 0
 -20 -6 -5 43.21 11.9 0
 -20 -6 -5 24.86 15.96 0
 -20 6 -5 24.19 16.75 0
 20 6 5 64.69 16.12 0
 20 6 5 46.69 16.18 0
 22 -6 5 203.69 17.67 0
 22 -6 5 174.73 17.29 0
 22 6 5 199.44 16.55 0
 -22 6 -5 220.98 17.68 0
 -22 6 -5 191.25 20.61 0
 -22 -6 -5 199.46 16.07 0
 -22 -6 -5 215.91 12.94 0
 22 6 5 176.73 17.02 0
 24 -6 5 21.44 15.72 0
 -24 6 -5 25.2 15.79 0
 24 -6 5 15.36 15.49 0
 -24 6 -5 21.11 15.9 0
 -24 -6 -5 17.61 11.93 0
 -24 -6 -5 34.06 14.89 0
 24 6 5 5.69 15.62 0
 24 6 5 24.12 15.23 0
 26 6 5 63.04 14.41 0
 -26 6 -5 64.05 15.86 0
 -26 6 -5 48.76 15.74 0
 -26 -6 -5 66.36 16.03 0
 -26 -6 -5 54.62 11.44 0
 26 6 5 52.77 15.41 0
 26 -6 5 61.33 15.18 0
 26 -6 5 64 16.54 0
 -28 6 -5 12.14 15.23 0
 -28 -6 -5 30.12 15.05 0
 28 -6 5 17.19 14.3 0
 -28 -6 -5 20.34 15.29 0
 28 6 5 23.03 14.64 0
 -28 6 -5 1.83 18.45 0
 28 6 5 24.94 14.67 0
 28 -6 5 36.35 18.02 0
 -33 -7 5 53.59 14.78 0
 33 -7 -5 46.37 19 0
 33 7 -5 63.71 14.78 0
 -33 7 5 54.71 23.47 0
 33 7 -5 62.42 15.02 0
 33 -7 -5 36.48 20.16 0
 -33 -7 5 56.85 15.11 0
 31 7 -5 76.58 10.98 0
 31 -7 -5 56.84 20.16 0
 -31 -7 5 60.8 15.35 0
 31 7 -5 45.62 14.83 0
 -31 -7 5 56.65 14.85 0
 31 -7 -5 59.28 20.41 0
 -31 7 5 75.97 24.4 0
 29 7 -5 28.28 14.96 0
 29 7 -5 39.2 15.5 0
 29 -7 -5 29.93 22.39 0
 -29 7 5 35.29 21.18 0
 -29 -7 5 28.13 14.59 0
 -29 -7 5 26.9 11.17 0
 29 -7 -5 32.11 23.08 0
 -27 -7 5 60.2 15.1 0
 27 7 -5 46.91 14.65 0
 -27 -7 5 42.53 10.22 0
 -27 7 5 51.5 23.25 0
 27 7 -5 50 15.36 0
 27 -7 -5 30.71 23.17 0
 -27 7 5 42.42 21.7 0
 27 -7 -5 34.51 20.9 0
 25 -7 -5 138.24 26.29 0
 -25 -7 5 152.59 16.33 0
 25 7 -5 170.32 15.82 0
 25 7 -5 159.24 16.48 0
 -25 7 5 158.88 25.25 0
 -25 -7 5 176.9 16.1 0
 25 -7 -5 164.78 25.6 0
 -25 7 5 169.14 26.7 0
 23 7 -5 11.33 15.21 0
 23 -7 -5 6.1 27.28 0
 -23 -7 5 3.26 15.81 0
 23 7 -5 23.84 15.53 0
 -23 -7 5 5.38 11.66 0
 -23 7 5 9.36 26.03 0
 -23 7 5 1.88 28.39 0
 23 -7 -5 5.41 30.26 0
 -21 -7 5 10.85 15.84 0
 -21 -7 5 2.87 15.41 0
 -21 7 5 4.29 37.22 0
 21 -7 -5 4.58 36.43 0
 21 7 -5 10.4 16.07 0
 21 -7 -5 -1.92 37.72 0
 -21 7 5 5.12 32.28 0
 21 7 -5 10.72 15.09 0
 19 7 -5 97.74 16.07 0
 19 7 -5 107.43 15.87 0
 -19 -7 5 110.64 15.53 0
 -19 -7 5 125.3 17.63 0
 17 7 -5 18.32 18.41 0
 17 7 -5 9.77 17.34 0
 -17 -7 5 11.48 18.05 0
 -17 -7 5 8.45 18.08 0
 15 7 -5 43.37 18.04 0
 15 7 -5 38.25 17.35 0
 -15 -7 5 53.08 17.53 0
 -13 -7 5 245.17 18.71 0
 13 7 -5 247.98 18.7 0
 -13 -7 5 253.26 19.85 0
 13 7 -5 244.27 17.59 0
 11 7 -5 397.34 18.6 0
 11 7 -5 409.07 20.8 0
 -11 -7 5 383.58 18.94 0
 -11 -7 5 417.62 20.09 0
 9 7 -5 78.04 17.13 0
 -9 -7 5 70.45 17.02 0
 9 7 -5 80.94 18.47 0
 -9 -7 5 71.35 18.74 0
 7 7 -5 43.73 16.75 0
 -7 -7 5 55.14 16.57 0
 7 7 -5 47.37 18.38 0
 -7 -7 5 55.54 21.62 0
 5 7 -5 14.65 16.86 0
 -5 -7 5 23.36 17 0
 -5 -7 5 22.14 18.13 0
 5 7 -5 9.6 21.84 0
 -3 7 5 166.46 28.63 0
 3 -7 -5 161.58 29.62 0
 3 7 -5 168.38 17.98 0
 -3 -7 5 158.71 19.17 0
 3 -7 -5 156.47 33.13 0
 -3 7 5 159.12 30.63 0
 -3 -7 5 170.82 22.33 0
 3 7 -5 167.07 20.02 0
 1 7 -5 11.96 16.97 0
 1 7 -5 21.16 19.01 0
 1 -7 -5 25.02 25.85 0
 -1 -7 5 25.12 17.28 0
 -1 7 5 20 22.69 0
 -1 -7 5 13.96 18.3 0
 1 -7 -5 12.71 23.38 0
 -1 7 5 20.89 25.12 0
 -1 7 -5 44.97 18.43 0
 1 7 5 35.81 22.2 0
 -1 7 -5 46.48 20.79 0
 1 7 5 45.82 22.78 0
 -1 -7 -5 41.24 18.78 0
 1 -7 5 33.55 18.06 0
 -1 -7 -5 31.73 23.43 0
 1 -7 5 42.2 21.53 0
 -3 7 -5 253.75 22.1 0
 -3 -7 -5 271.4 24.68 0
 3 7 5 263.97 24.62 0
 3 -7 5 248.41 23.02 0
 -3 -7 -5 230.22 20.31 0
 3 -7 5 276.11 19.47 0
 -3 7 -5 263.24 23.74 0
 3 7 5 265.17 20.38 0
 -5 7 -5 188.74 22.07 0
 -5 7 -5 203.5 23.26 0
 -5 -7 -5 190.88 20.39 0
 5 -7 5 189.1 22.4 0
 -5 -7 -5 209.6 24.29 0
 5 7 5 189.26 24.31 0
 5 -7 5 202.03 19.23 0
 5 7 5 193.08 20.14 0
 7 -7 5 133.94 22.86 0
 -7 7 -5 137.73 22.47 0
 -7 7 -5 119.99 21.69 0
 7 7 5 135.38 18.9 0
 7 7 5 109.34 19.83 0
 -7 -7 -5 122.25 23.5 0
 -7 -7 -5 140.59 22.89 0
 7 -7 5 140.81 22.93 0
 -9 7 -5 16.61 21.43 0
 9 7 5 21.77 17.62 0
 -9 -7 -5 25.88 22.15 0
 -9 7 -5 20.75 21.83 0
 9 -7 5 22.6 19.21 0
 -9 -7 -5 26.06 17.88 0
 9 7 5 35.05 17.72 0
 9 -7 5 28.23 22.09 0
 -11 -7 -5 171.14 19.3 0
 11 7 5 130.59 18.63 0
 11 -7 5 148.17 18.93 0
 11 -7 5 155.88 23.76 0
 -11 7 -5 163.74 22.75 0
 -11 -7 -5 141.29 18.37 0
 -11 7 -5 157.26 23.93 0
 11 7 5 148.77 18.82 0
 13 -7 5 191.5 19.05 0
 13 -7 5 222.88 23.04 0
 -13 7 -5 206.92 23.35 0
 -13 -7 -5 185.68 18.58 0
 13 7 5 195.37 18.38 0
 13 7 5 169.89 18.53 0
 -13 7 -5 194.56 17.97 0
 -13 -7 -5 229.14 18.6 0
 15 -7 5 90.68 21.59 0
 15 -7 5 99.14 17.36 0
 -15 7 -5 97.88 21.56 0
 -15 -7 -5 100.41 18 0
 15 7 5 93.42 17.7 0
 -15 -7 -5 119.35 18.01 0
 15 7 5 105.16 17.46 0
 -15 7 -5 89.29 17.77 0
 17 -7 5 11.39 17.31 0
 17 -7 5 8.54 21.18 0
 -17 -7 -5 33.75 17.47 0
 -17 7 -5 25.54 18 0
 17 7 5 24.81 16.83 0
 -17 -7 -5 34.08 17.01 0
 17 7 5 40.45 16.7 0
 -17 7 -5 37.95 20.96 0
 -19 7 -5 70.76 17.08 0
 19 -7 5 75.6 20.35 0
 -19 -7 -5 84.5 16.75 0
 -19 -7 -5 70.95 17.13 0
 19 7 5 61.29 16.45 0
 19 7 5 61.24 12.53 0
 19 -7 5 66.07 20.29 0
 -19 7 -5 81.11 21.06 0
 21 -7 5 43.67 16.23 0
 -21 7 -5 43.9 16.62 0
 21 -7 5 49.85 19.79 0
 -21 -7 -5 32.9 16.47 0
 -21 7 -5 43.82 15.97 0
 21 7 5 30.39 15.9 0
 21 7 5 39.72 15.55 0
 -21 -7 -5 36.06 10.72 0
 23 -7 5 65.35 14.87 0
 23 7 5 75.07 15.62 0
 -23 7 -5 71.57 17.96 0
 -23 -7 -5 59.61 15.62 0
 -23 -7 -5 75.29 11.76 0
 -23 7 -5 71.65 17.34 0
 23 -7 5 73.19 17.83 0
 23 7 5 93.79 15.46 0
 25 -7 5 33.89 16.16 0
 -25 7 -5 45.67 15.88 0
 -25 7 -5 55.21 16.48 0
 -25 -7 -5 37.55 15.46 0
 -25 -7 -5 49.03 15.6 0
 25 7 5 43.21 14.46 0
 25 7 5 33.87 15.29 0
 25 -7 5 41.77 15.83 0
 27 -7 5 11.69 19.37 0
 -27 7 -5 1.36 18.99 0
 27 -7 5 13.32 15.56 0
 -27 -7 -5 23.54 15.11 0
 -27 -7 -5 8.7 14.67 0
 -27 7 -5 -4.01 14.57 0
 27 7 5 -1.33 10.35 0
 27 7 5 23.57 14.02 0
 30 -8 -5 11.36 28.09 0
 30 8 -5 17.34 14.41 0
 -30 8 5 -3.21 25.71 0
 30 8 -5 16.12 10.27 0
 -30 -8 5 6.65 14.76 0
 30 -8 -5 11.95 27.14 0
 -30 -8 5 0.57 14.52 0
 -30 8 5 10.21 22.6 0
 -28 -8 5 92.43 15.89 0
 28 8 -5 86.07 14.93 0
 -28 8 5 96.01 32.01 0
 28 -8 -5 65.32 31.21 0
 -28 8 5 49.12 28.56 0
 28 8 -5 76.96 15.29 0
 28 -8 -5 87.72 31.94 0
 -28 -8 5 81.1 15.28 0
 -26 -8 5 27.53 16.01 0
 26 8 -5 30.45 14.52 0
 26 8 -5 40.03 14 0
 -26 -8 5 46.56 15.15 0
 -24 -8 5 84.6 15.33 0
 24 8 -5 61.93 16.09 0
 -24 -8 5 38.45 15 0
 24 8 -5 45.72 14.84 0
 22 8 -5 252.22 15.86 0
 22 8 -5 255.03 17.63 0
 -22 -8 5 234.44 16.74 0
 -22 -8 5 277.47 18.41 0
 -20 -8 5 -11.06 17.54 0
 -20 -8 5 6.14 16.37 0
 20 8 -5 18.96 16.05 0
 20 8 -5 17.89 16.69 0
 -18 -8 5 48.44 16.85 0
 18 8 -5 31.66 16.36 0
 18 8 -5 41.23 16.74 0
 -16 -8 5 175.32 17.36 0
 -16 -8 5 167.91 18.04 0
 16 8 -5 165.55 18.11 0
 16 8 -5 166.69 17.76 0
 -14 -8 5 1.58 16.11 0
 14 8 -5 7.14 16.54 0
 14 8 -5 5.63 16.62 0
 -14 -8 5 -7.67 17.23 0
 -12 -8 5 94.38 17.47 0
 -12 -8 5 99.38 21.59 0
 12 8 -5 101.56 17.97 0
 12 8 -5 101.58 17.51 0
 10 8 -5 352.85 19.57 0
 10 8 -5 341.37 18.51 0
 -10 -8 5 331.51 17.55 0
 -10 -8 5 345.92 18.93 0
 8 8 -5 1.35 15.79 0
 8 8 -5 6.37 17.55 0
 -8 -8 5 8.37 19.44 0
 -8 -8 5 6.77 17.26 0
 -6 -8 5 430.09 24.19 0
 6 8 -5 389.67 19.21 0
 -6 -8 5 409.73 18.79 0
 6 8 -5 410.52 20.75 0
 -4 -8 5 27.85 16.59 0
 4 8 -5 39.53 19.92 0
 -4 -8 5 32.01 21.66 0
 4 8 -5 37.03 18.11 0
 2 -8 -5 12.69 27.64 0
 2 8 -5 14.69 17.98 0
 -2 -8 5 19.65 18.21 0
 2 8 -5 15.31 16.06 0
 -2 8 5 17.12 27.29 0
 -2 -8 5 6.14 20.31 0
 -2 8 5 15.66 27.82 0
 0 8 5 507.46 30.84 0
 0 8 -5 478.72 23.27 0
 0 8 5 498.49 30.13 0
 0 -8 5 497.66 21.18 0
 0 -8 5 545.29 26.65 0
 0 -8 -5 459.26 27.13 0
 0 -8 -5 503.36 27.77 0
 0 8 -5 499.11 26.07 0
 -2 8 -5 21.41 21.1 0
 2 -8 5 18.21 21.41 0
 2 8 5 19.03 21.9 0
 -2 8 -5 24.09 23.79 0
 2 -8 5 23.02 18.55 0
 -2 -8 -5 26.76 22.51 0
 -2 -8 -5 10.8 22.1 0
 2 8 5 24.9 23.18 0
 -4 8 -5 146.65 22.08 0
 4 8 5 155.73 22.91 0
 -4 -8 -5 138 23.31 0
 4 8 5 156.62 22.85 0
 -4 8 -5 144.15 23.99 0
 -4 -8 -5 156.92 19.75 0
 4 -8 5 156.85 23.64 0
 4 -8 5 156.91 23.86 0
 -6 8 -5 158.98 23.28 0
 -6 -8 -5 146.23 22.39 0
 -6 8 -5 148.09 18.91 0
 -6 -8 -5 155.26 18.63 0
 6 -8 5 146.55 24.76 0
 6 8 5 136.77 17.27 0
 6 8 5 160.35 18.56 0
 6 -8 5 164.27 23.85 0
 8 8 5 8.99 17.52 0
 -8 8 -5 18.16 21.83 0
 8 8 5 3.3 19.76 0
 -8 -8 -5 4.89 16.61 0
 8 -8 5 9.91 21.63 0
 -8 -8 -5 15.51 21.35 0
 8 -8 5 -1.63 22.93 0
 -8 8 -5 10.17 16.62 0
 -10 8 -5 296.02 24.44 0
 10 -8 5 259.39 27.34 0
 -10 8 -5 261.14 24.06 0
 -10 -8 -5 283.59 18.79 0
 10 -8 5 274.92 24.79 0
 -10 -8 -5 245.43 18.52 0
 10 8 5 275.64 17.83 0
 10 8 5 269.99 21.61 0
 12 -8 5 234.88 22.64 0
 12 -8 5 226.19 22.28 0
 -12 -8 -5 257.29 18.32 0
 -12 8 -5 263.51 22.76 0
 12 8 5 247.49 17.96 0
 -12 -8 -5 228.56 17.9 0
 -12 8 -5 235.31 23.26 0
 12 8 5 235.36 17.92 0
 -14 8 -5 26.96 20.51 0
 -14 -8 -5 34.31 16.48 0
 14 -8 5 28.69 20.17 0
 -14 8 -5 38.07 20.11 0
 -14 -8 -5 28.3 16.94 0
 14 8 5 34.83 16.52 0
 14 8 5 26.61 16.65 0
 14 -8 5 33.42 21.7 0
 -16 -8 -5 67.42 16.05 0
 -16 8 -5 73.04 20.36 0
 16 -8 5 69.87 20.55 0
 16 -8 5 64.65 16.37 0
 -16 -8 -5 67.11 16.94 0
 -16 8 -5 65.24 17.07 0
 16 8 5 68.82 16.47 0
 16 8 5 72.01 16.59 0
 18 -8 5 2.38 19.84 0
 18 -8 5 8.78 19.74 0
 -18 -8 -5 16.53 16.72 0
 -18 -8 -5 6.21 17.18 0
 -18 8 -5 -2.46 19.36 0
 18 8 5 3.34 16.7 0
 18 8 5 7.97 11.92 0
 -18 8 -5 7.16 19.61 0
 20 -8 5 76.48 20.96 0
 -20 -8 -5 87.19 16.26 0
 20 -8 5 73.93 21.03 0
 -20 -8 -5 89.03 15.94 0
 -20 8 -5 82.6 21.48 0
 20 8 5 56.21 16.11 0
 20 8 5 78.81 15.59 0
 -20 8 -5 74.08 17.12 0
 22 -8 5 31.39 20.52 0
 22 -8 5 33.79 19.96 0
 -22 -8 -5 38.86 14.84 0
 -22 -8 -5 37.23 16.02 0
 -22 8 -5 35.97 16.23 0
 -22 8 -5 46.45 21.19 0
 22 8 5 28.56 15.5 0
 22 8 5 28.42 15.1 0
 24 -8 5 21.41 19.58 0
 -24 -8 -5 21.94 15.62 0
 -24 8 -5 33.09 20.22 0
 -24 -8 -5 23.41 15.44 0
 24 -8 5 32.72 19.65 0
 -24 8 -5 21.45 18.56 0
 24 8 5 4.11 10.97 0
 24 8 5 -1.14 15.23 0
 -27 -9 5 24.08 15.5 0
 27 9 -5 38.74 14.9 0
 27 9 -5 40.98 15.19 0
 -27 -9 5 40.16 14.89 0
 -25 -9 5 -6.19 16.08 0
 25 9 -5 6.44 14.89 0
 -25 -9 5 2.9 14.89 0
 25 9 -5 6.11 14.91 0
 -23 -9 5 7.65 15.58 0
 23 9 -5 4.92 15.17 0
 23 9 -5 9.62 15.11 0
 -21 -9 5 319.63 17.82 0
 21 9 -5 280.84 16.52 0
 21 9 -5 294.69 17.33 0
 19 9 -5 -0.81 16.1 0
 -19 -9 5 -20.18 15.98 0
 19 9 -5 2.73 15.39 0
 -19 -9 5 6.06 16.77 0
 -17 -9 5 131.68 15.1 0
 -17 -9 5 144.2 17.27 0
 17 9 -5 135.16 15.99 0
 17 9 -5 135.26 15.49 0
 15 9 -5 54.39 15.74 0
 -15 -9 5 53.09 15.53 0
 15 9 -5 63.13 16.25 0
 -15 -9 5 66.26 16.36 0
 13 9 -5 25.64 15.77 0
 -13 -9 5 14.25 20.42 0
 13 9 -5 27.04 16.54 0
 -13 -9 5 21.26 15.46 0
 -11 -9 5 170.28 19.76 0
 11 9 -5 161.96 20.69 0
 11 9 -5 165.38 17.14 0
 -11 -9 5 167.38 17.34 0
 -9 -9 5 1.72 15.22 0
 9 9 -5 6.52 15.42 0
 -9 -9 5 12.2 16.3 0
 9 9 -5 -8.8 19.66 0
 -7 -9 5 83.54 19.67 0
 7 9 -5 72.51 19.33 0
 7 9 -5 73.19 18.28 0
 -7 -9 5 63.52 20.96 0
 -5 -9 5 270.81 18.09 0
 -5 -9 5 277.93 22.28 0
 5 9 -5 272.81 22.18 0
 5 9 -5 269.24 21.79 0
 3 9 -5 6.89 16.59 0
 3 9 -5 6.24 16.59 0
 -3 -9 5 6.54 22.86 0
 -3 -9 5 10.94 19.86 0
 1 9 -5 284.34 25.1 0
 -1 -9 5 272.92 20.45 0
 1 9 -5 276.87 22.48 0
 1 -9 -5 269.75 30.36 0
 -1 9 5 265.86 29.15 0
 -1 -9 5 287.68 19.12 0
 1 -9 -5 274.97 29.28 0
 -1 9 5 285.21 29.11 0
 -1 9 -5 122.76 21.1 0
 1 9 5 110.42 22.89 0
 -1 -9 -5 113 25.86 0
 -1 -9 -5 118.79 25.58 0
 1 -9 5 122.01 22.35 0
 -1 9 -5 119.35 23.97 0
 1 -9 5 110.64 19.78 0
 1 9 5 118.07 21.9 0
 -3 9 -5 14.21 20.98 0
 -3 9 -5 14.96 22.58 0
 3 -9 5 0.84 21.31 0
 -3 -9 -5 4.79 22 0
 -3 -9 -5 16.41 22.15 0
 3 -9 5 3.33 23.34 0
 3 9 5 8.74 22.28 0
 3 9 5 5.68 21.04 0
 -5 -9 -5 91.27 22.39 0
 5 -9 5 102.63 20.44 0
 -5 9 -5 82.22 24.34 0
 5 9 5 94.15 22.78 0
 -5 -9 -5 93.3 22.81 0
 5 -9 5 105.47 23.48 0
 5 9 5 87.77 18.55 0
 -5 9 -5 94.46 22.84 0
 -7 -9 -5 10 17.82 0
 -7 9 -5 20.66 22.24 0
 -7 -9 -5 31 18.82 0
 7 9 5 15.85 21.27 0
 7 -9 5 20.81 20.42 0
 7 -9 5 21.86 21.79 0
 7 9 5 21.87 20.45 0
 -7 9 -5 25.02 20.31 0
 9 -9 5 18.71 23.48 0
 9 -9 5 5.89 24.24 0
 -9 -9 -5 28.81 20.75 0
 -9 -9 -5 9.55 16.74 0
 9 9 5 25.14 19.69 0
 9 9 5 10.06 16.9 0
 -9 9 -5 18.98 20.38 0
 -11 9 -5 298.95 23.37 0
 -11 -9 -5 282.68 18.68 0
 11 -9 5 309.21 23.53 0
 11 -9 5 272.59 23.01 0
 -11 -9 -5 306.44 19.05 0
 11 9 5 302.81 22.4 0
 11 9 5 285.36 18.59 0
 -11 9 -5 286.31 25.96 0
 13 -9 5 -0.21 24.64 0
 13 9 5 1.66 15.74 0
 13 -9 5 0.03 20.34 0
 13 9 5 1.43 19.52 0
 -13 -9 -5 8.92 15.4 0
 -13 9 -5 6.68 20.73 0
 -13 9 -5 -3.04 20.51 0
 -13 -9 -5 4.46 15.69 0
 15 9 5 17.65 15.44 0
 15 -9 5 18.21 23.35 0
 -15 9 -5 9.13 23.57 0
 -15 9 -5 24.41 19.88 0
 15 -9 5 15.49 20.12 0
 -15 -9 -5 19.25 15.83 0
 -15 -9 -5 15.56 16.18 0
 15 9 5 17.78 15.67 0
 -17 -9 -5 5.38 16.06 0
 17 9 5 18.12 19.74 0
 -17 -9 -5 23.28 15.62 0
 17 -9 5 21.58 19.94 0
 17 -9 5 8.74 20.11 0
 17 9 5 27.02 16.05 0
 -17 9 -5 10.92 19.96 0
 -17 9 -5 16.86 19.8 0
 19 -9 5 17.2 19.48 0
 19 -9 5 17.63 19.13 0
 19 9 5 18.07 15.66 0
 -19 9 -5 29.23 20.1 0
 -19 -9 -5 27.72 16.17 0
 19 9 5 25.43 15.93 0
 -19 9 -5 19.6 19.36 0
 -19 -9 -5 31.08 16.27 0
 21 9 5 59.1 15.39 0
 -21 9 -5 80.8 16.73 0
 21 9 5 79.45 16.09 0
 21 -9 5 74.84 20.09 0
 -21 -9 -5 69.72 16.73 0
 -21 -9 -5 63.98 15.9 0
 -21 9 -5 54.76 19.18 0
 21 -9 5 59.63 20.5 0
 23 9 5 -13.46 15.15 0
 -23 9 -5 -12.76 15.92 0
 -23 -9 -5 12.14 15.9 0
 -23 9 -5 -2.76 18.67 0
 23 9 5 8.59 15.91 0
 -24 -10 5 38.51 16.29 0
 24 10 -5 32.57 15.52 0
 -24 -10 5 23.61 14.97 0
 24 10 -5 35.89 14.24 0
 22 10 -5 12.38 16.18 0
 -22 -10 5 -9.12 16.12 0
 -22 -10 5 9.25 14.94 0
 22 10 -5 0.11 14.98 0
 -20 -10 5 8.47 15.17 0
 20 10 -5 18.63 15.54 0
 -20 -10 5 22.01 16.4 0
 20 10 -5 15.57 16.33 0
 -18 -10 5 -0.79 15.9 0
 -18 -10 5 -11.15 15.29 0
 18 10 -5 14.3 16.09 0
 18 10 -5 2.55 14.91 0
 -16 -10 5 29.95 15.09 0
 -16 -10 5 24.22 16.42 0
 16 10 -5 37.04 15.46 0
 16 10 -5 31.88 15.87 0
 14 10 -5 36.06 14.98 0
 -14 -10 5 33.06 15.72 0
 -14 -10 5 37.95 19.56 0
 14 10 -5 39.54 16.43 0
 12 10 -5 18.99 16.42 0
 12 10 -5 13.08 16.07 0
 -12 -10 5 12.85 18.28 0
 -12 -10 5 9.3 16.84 0
 10 10 -5 8.33 14.95 0
 10 10 -5 7.09 16.63 0
 -10 -10 5 12.87 18.85 0
 -10 -10 5 9.23 16.82 0
 8 10 -5 10.31 17.01 0
 8 10 -5 5.35 18.87 0
 -8 -10 5 0.77 19.23 0
 -8 -10 5 -2.26 21.52 0
 -6 -10 5 11.01 17.38 0
 6 10 -5 14.71 19.26 0
 6 10 -5 22.01 20.93 0
 -6 -10 5 23.03 15.99 0
 4 10 -5 -3.8 21.03 0
 4 10 -5 4.6 19.09 0
 -4 -10 5 3.83 19.27 0
 -4 -10 5 13.32 17.77 0
 2 10 -5 45.59 19.2 0
 2 10 -5 40.07 21.99 0
 -2 -10 5 57.21 19.28 0
 -2 -10 5 46.05 17.92 0
 0 -10 5 81.77 20.79 0
 0 10 -5 89.35 19.06 0
 0 -10 5 86.59 16.86 0
 0 10 5 75.73 23.76 0
 0 -10 -5 76.43 26.77 0
 0 10 -5 86.27 17.2 0
 0 -10 -5 80.02 27.13 0
 0 10 5 85.7 26.23 0
 2 -10 5 3.18 20.81 0
 2 10 5 -4.21 22.42 0
 2 10 5 -9.31 22.92 0
 -2 -10 -5 -2.15 23.06 0
 -2 10 -5 6.47 18.77 0
 -2 10 -5 0.01 20.39 0
 2 -10 5 -0.76 18.81 0
 -4 10 -5 33.95 19.65 0
 -4 10 -5 43.44 21.01 0
 -4 -10 -5 30.47 20.25 0
 4 10 5 37.28 20.08 0
 4 10 5 26.99 19.95 0
 -4 -10 -5 33.47 20.3 0
 4 -10 5 33.34 20.25 0
 4 -10 5 40.75 21.48 0
 -6 10 -5 1.27 22.91 0
 -6 10 -5 -4.9 24.25 0
 6 -10 5 1 23.59 0
 -6 -10 -5 5.33 20.79 0
 6 10 5 -6.86 20.01 0
 -6 -10 -5 4.43 20.37 0
 6 -10 5 0.15 21.65 0
 6 10 5 7.45 20.43 0
 -8 -10 -5 35.96 20.15 0
 8 -10 5 44.24 21.57 0
 -8 -10 -5 36.2 17.19 0
 8 -10 5 38.07 25.54 0
 -8 10 -5 29.24 20.67 0
 8 10 5 43.55 16.69 0
 -8 10 -5 41.68 24.55 0
 8 10 5 50.91 20.92 0
 -10 -10 -5 25.62 16.73 0
 -10 10 -5 17.59 19.83 0
 -10 10 -5 14.32 23.42 0
 10 -10 5 21.08 20.85 0
 10 -10 5 23.58 23.89 0
 10 10 5 19.63 16.06 0
 10 10 5 7.82 16.19 0
 -10 -10 -5 23.85 16.29 0
 -12 10 -5 -2.42 22.26 0
 12 -10 5 -0.59 22.9 0
 -12 -10 -5 -2.78 19.53 0
 12 -10 5 2.98 23.14 0
 12 10 5 -5.95 15.38 0
 -12 10 -5 8.24 19.06 0
 -12 -10 -5 11.73 15.6 0
 12 10 5 -0.36 15.23 0
 -14 -10 -5 21 16.15 0
 14 10 5 8.56 18.22 0
 -14 -10 -5 6.48 16.09 0
 14 -10 5 8.87 26.45 0
 14 10 5 -7.93 15.07 0
 -14 10 -5 12.69 22.33 0
 14 -10 5 4.68 22.89 0
 16 -10 5 4.19 23.24 0
 -16 -10 -5 7.52 15.48 0
 -16 10 -5 9.3 22.42 0
 16 -10 5 5.28 23.78 0
 -16 -10 -5 8.28 19.2 0
 16 10 5 -10.22 15.17 0
 -16 10 -5 -0.58 22.26 0
 16 10 5 9.78 15.79 0
 -18 -10 -5 32.1 19.51 0
 -18 10 -5 3.99 20.44 0
 18 10 5 0.97 15.77 0
 18 -10 5 8.58 23.01 0
 -18 10 -5 3.37 21.35 0
 -18 -10 -5 22.28 19.6 0
 18 -10 5 2.15 22.3 0
 18 10 5 -3.91 14.53 0
 -19 -11 5 9.33 15.53 0
 19 11 -5 -1.95 15.74 0
 19 11 -5 5.75 14.17 0
 -19 -11 5 1 13.74 0
 17 11 -5 7.57 14.67 0
 -17 -11 5 17.7 14.6 0
 17 11 -5 9.84 16.64 0
 -17 -11 5 -0.65 15.71 0
 -15 -11 5 -3.04 19.25 0
 -15 -11 5 7.42 14.91 0
 15 11 -5 3.21 14.3 0
 15 11 -5 16.54 15.91 0
 13 11 -5 82.13 19.45 0
 -13 -11 5 98.43 15.51 0
 13 11 -5 91.67 19.86 0
 -13 -11 5 95.04 15.4 0
 11 11 -5 -3.04 14.02 0
 11 11 -5 -5.44 15.48 0
 -11 -11 5 -4.46 15.2 0
 -11 -11 5 -7.63 15.32 0
 9 11 -5 10.82 13.89 0
 -9 -11 5 14.94 20.01 0
 -9 -11 5 21.23 22.34 0
 9 11 -5 31.83 16.77 0
 7 11 -5 20.1 14.87 0
 7 11 -5 15.77 20.02 0
 -7 -11 5 24.39 16.96 0
 -7 -11 5 18.41 19.06 0
 5 11 -5 15.54 21.57 0
 5 11 -5 7.99 16.27 0
 -5 -11 5 11.4 19.22 0
 -5 -11 5 12.43 17.31 0
 -3 -11 5 15.68 19.33 0
 -3 -11 5 19.92 20.73 0
 3 11 -5 22.29 20.4 0
 3 11 -5 13.1 18.31 0
 -1 -11 5 16 19.36 0
 1 11 -5 10.74 20.05 0
 -1 -11 5 13.38 21.24 0
 1 11 -5 14.88 14.66 0
 1 11 5 10.74 24.03 0
 -1 -11 -5 20.66 24.54 0
 1 -11 5 9.71 20.27 0
 1 11 5 18.26 23.64 0
 -1 -11 -5 9.14 25.34 0
 -1 11 -5 18.26 21.37 0
 -1 11 -5 22.15 19.71 0
 1 -11 5 16.29 22.1 0
 -3 11 -5 72.31 21.96 0
 -3 -11 -5 78.9 22.97 0
 3 -11 5 75.43 24.07 0
 3 11 5 74.63 22.66 0
 -3 -11 -5 67.43 21.59 0
 -3 11 -5 76.69 23.54 0
 3 -11 5 70.32 19.98 0
 3 11 5 69.05 22.58 0
 -5 11 -5 19.89 20.96 0
 5 11 5 25.96 20.09 0
 5 -11 5 27.54 22.35 0
 -5 11 -5 21.63 22.14 0
 -5 -11 -5 21.04 19.55 0
 5 11 5 23.52 19.66 0
 5 -11 5 23.98 23 0
 7 -11 5 14.48 26.4 0
 7 11 5 12.16 16.64 0
 -7 11 -5 17.21 23.21 0
 -7 -11 -5 15.95 19.59 0
 -7 -11 -5 18.18 19.87 0
 7 -11 5 19.17 22.79 0
 -7 11 -5 15.01 25.41 0
 7 11 5 22.24 15.87 0
 -9 11 -5 0.83 24.12 0
 9 -11 5 9.01 28.27 0
 -9 -11 -5 -3.07 20.45 0
 9 11 5 15.25 15.78 0
 -9 11 -5 8.44 25.2 0
 9 -11 5 3.8 26.54 0
 -9 -11 -5 14.9 19.28 0
 9 11 5 6 19.4 0
 11 -11 5 3.48 28.66 0
 -11 -11 -5 17.6 19.7 0
 11 -11 5 0.13 28.98 0
 11 11 5 11.64 20.59 0
 -11 11 -5 6.95 24.8 0
 -11 -11 -5 1.09 20.5 0
 -11 11 -5 5.99 24.09 0
 11 11 5 0.82 16.35 0
 -13 11 -5 -6.37 25.69 0
 -13 -11 -5 34.34 16.28 0
 -13 -11 -5 22.12 19.37 0
 -13 11 -5 24.36 26.09 0
 13 11 5 23 15.78 0
 13 -11 5 25.31 28.62 0
 13 11 5 21.34 15.82 0
 13 -11 5 23.16 30.27 0
 15 11 5 -13.81 15.68 0
 -15 11 -5 2.9 29.61 0
 15 -11 5 4.07 31.84 0
 15 -11 5 5.62 31.32 0
 -15 -11 -5 12.13 15.22 0
 15 11 5 0.61 15.29 0
 -15 11 -5 0.77 26.62 0
 14 12 -5 34.59 16.59 0
 14 12 -5 43.11 18.43 0
 12 12 -5 48.76 16.53 0
 -12 -12 5 63.36 17.37 0
 12 12 -5 44.81 15.52 0
 -12 -12 5 38.29 18.98 0
 -10 -12 5 7.32 14.7 0
 10 12 -5 -2.61 18.1 0
 10 12 -5 9.32 16.02 0
 -10 -12 5 -1.47 19.54 0
 -8 -12 5 7.72 20.78 0
 8 12 -5 6.93 14.62 0
 -8 -12 5 10.22 18.06 0
 8 12 -5 10.8 16.34 0
 6 12 -5 22.34 16.89 0
 -6 -12 5 28.85 20.58 0
 -6 -12 5 24.51 18.66 0
 6 12 -5 25.72 18.62 0
 4 12 -5 22.42 18.12 0
 -4 -12 5 24.31 20.04 0
 -4 -12 5 32.87 18.35 0
 4 12 -5 24.02 20.17 0
 2 12 -5 -0.37 17.2 0
 -2 -12 5 6.66 21.19 0
 -2 -12 5 10.92 19.89 0
 2 12 -5 0.02 20.45 0
 0 -12 5 1.87 21.86 0
 0 12 -5 4.62 19.96 0
 0 -12 5 4.29 20.11 0
 0 12 -5 1.71 19.23 0
 2 -12 5 17.12 22.23 0
 2 12 5 16.78 26.54 0
 -2 -12 -5 22.02 31.04 0
 2 12 5 20.91 26.4 0
 -2 12 -5 17.08 20.25 0
 -2 -12 -5 20.22 29.41 0
 -2 12 -5 23.36 22.03 0
 2 -12 5 19.51 26.15 0
 -4 -12 -5 28.01 24.06 0
 -4 -12 -5 25.74 22.42 0
 4 12 5 23.64 22.55 0
 4 -12 5 24.92 25.29 0
 -4 12 -5 21.85 24.61 0
 -4 12 -5 17.1 22.58 0
 4 -12 5 20.35 28.88 0
 4 12 5 18.22 23.99 0
 -6 -12 -5 30.17 21.34 0
 6 -12 5 18.26 29.96 0
 6 12 5 19.69 21.96 0
 -6 12 -5 15.68 28.62 0
 -6 -12 -5 9.49 22.42 0
 -6 12 -5 12.36 27.42 0
 6 12 5 12.24 22.27 0
 6 -12 5 17.92 30.52 0
 8 12 5 10.71 19.04 0
 -8 -12 -5 9.25 19.21 0
 -8 -12 -5 8.15 19.03 0
 8 12 5 -8.24 18.7 0
 -38 0 6 101.6 14.85 0
 -38 0 6 95.61 11.75 0
 38 0 -6 91.46 15.65 0
 38 0 -6 82.24 15 0
 -36 0 6 99.69 16.67 0
 -36 0 6 87.64 15.45 0
 36 0 -6 103.13 16.33 0
 36 0 -6 104.46 16.12 0
 -34 0 6 148.32 16.47 0
 34 0 -6 131.93 15.94 0
 34 0 -6 137.83 15.4 0
 -34 0 6 171.51 16.8 0
 -32 0 6 630.67 20.04 0
 -32 0 6 589.3 18.87 0
 32 0 -6 556.32 18.83 0
 32 0 -6 535.03 19.68 0
 -30 0 6 63.4 17.01 0
 -30 0 6 61.86 16.16 0
 30 0 -6 61.16 16.47 0
 30 0 -6 43.01 16.76 0
 -28 0 6 106.29 12.28 0
 28 0 -6 97.53 11.89 0
 28 0 -6 83.98 17.78 0
 -28 0 6 105.81 17.86 0
 -26 0 6 193.05 19.08 0
 -26 0 6 162.49 18.47 0
 26 0 -6 150.98 18.34 0
 26 0 -6 157.31 18.53 0
 -24 0 6 112.13 13.33 0
 24 0 -6 99.45 12.93 0
 -24 0 6 88.92 13.39 0
 24 0 -6 99.08 17.63 0
 22 0 -6 775.04 22.5 0
 -22 0 6 816.79 21.96 0
 22 0 -6 807.47 22.7 0
 -22 0 6 897.91 23.37 0
 20 0 -6 188.21 19.77 0
 20 0 -6 186.38 19.22 0
 -20 0 6 193.91 20.07 0
 -20 0 6 212.85 19.54 0
 18 0 -6 1222.8 25.89 0
 -18 0 6 1275.91 26.29 0
 -18 0 6 1129.79 21.49 0
 18 0 -6 1124.38 25.73 0
 -16 0 6 469.41 23.34 0
 16 0 -6 458.59 23.43 0
 16 0 -6 401.08 23.55 0
 -16 0 6 420.64 17.61 0
 14 0 -6 699.54 27.28 0
 14 0 -6 713.67 28.79 0
 -14 0 6 744.59 27.78 0
 -14 0 6 694.96 27.49 0
 12 0 -6 1771.69 34.76 0
 12 0 -6 1877.26 34.74 0
 -12 0 6 1886.05 29.41 0
 -10 0 6 1349 32.53 0
 10 0 -6 1317.88 32.71 0
 -10 0 6 1344.94 27.08 0
 10 0 -6 1242.23 32.18 0
 8 0 -6 431.27 28.69 0
 8 0 -6 430.72 29.28 0
 -8 0 6 455.24 28.36 0
 -8 0 6 443.13 29.05 0
 -6 0 6 417.84 29.22 0
 6 0 -6 422.03 29.32 0
 6 0 -6 419.4 29.4 0
 -6 0 6 437.98 29.15 0
 4 0 -6 2.43 27.53 0
 4 0 -6 3.34 20.03 0
 -4 0 6 8.05 27.53 0
 -4 0 6 12.23 27.26 0
 2 0 -6 186.51 28.38 0
 -2 0 6 198 27.9 0
 -2 0 6 194.19 28.76 0
 2 0 -6 186.93 28.82 0
 0 0 6 9126.25 59.95 0
 0 0 -6 9476.5 61.5 0
 0 0 -6 8798.1 59.25 0
 0 0 6 9310.21 61.27 0
 2 0 6 91.38 19.08 0
 -2 0 -6 87.19 27.51 0
 2 0 6 70.16 26.86 0
 -2 0 -6 85.31 26.07 0
 4 0 6 238.47 26.78 0
 4 0 6 241.18 20.25 0
 -4 0 -6 236.05 20.17 0
 -4 0 -6 245.17 20.69 0
 6 0 6 1793.56 35.87 0
 -6 0 -6 1829.1 36.03 0
 -6 0 -6 1650.31 34.21 0
 6 0 6 1633.19 34.44 0
 8 0 6 57.38 26.89 0
 8 0 6 55.26 25.93 0
 -8 0 -6 58.44 26.38 0
 -8 0 -6 61.58 25.78 0
 -10 0 -6 5154.2 39.82 0
 10 0 6 5620.41 42.06 0
 -10 0 -6 5583.41 41.89 0
 10 0 6 5066.53 39.86 0
 12 0 6 231.4 20.46 0
 -12 0 -6 213.97 20.49 0
 -12 0 -6 218.27 20.92 0
 12 0 6 197.95 20.5 0
 -14 0 -6 503.5 21.52 0
 14 0 6 553.98 21.26 0
 -14 0 -6 563.35 21.85 0
 14 0 6 478.78 20.71 0
 16 0 6 262.55 19.93 0
 -16 0 -6 269.03 20.6 0
 -16 0 -6 248.26 20.04 0
 16 0 6 234.38 19.82 0
 18 0 6 181.41 18.85 0
 -18 0 -6 212.74 19.27 0
 -18 0 -6 170.39 18.61 0
 18 0 6 188.7 18.3 0
 -20 0 -6 49.22 17.15 0
 20 0 6 44.48 17.24 0
 -20 0 -6 62.2 18.38 0
 20 0 6 38.92 17.28 0
 22 0 6 -1.05 11.37 0
 -22 0 -6 12.58 12.16 0
 -22 0 -6 -11.01 16.41 0
 22 0 6 14.41 16 0
 24 0 6 7.21 15.93 0
 -24 0 -6 20.46 11.17 0
 24 0 6 15.31 16.47 0
 -24 0 -6 9.47 11.14 0
 26 0 6 21.58 14.97 0
 26 0 6 18.54 15.36 0
 -26 0 -6 5.67 15.69 0
 -26 0 -6 20.5 15.53 0
 28 0 6 21.62 15.32 0
 -28 0 -6 38.76 14.35 0
 -28 0 -6 35.38 15.54 0
 28 0 6 9.81 15.11 0
 30 0 6 -2.19 13.76 0
 -30 0 -6 -1.73 15.19 0
 -30 0 -6 -2.08 9.64 0
 30 0 6 4.87 14.24 0
 32 0 6 101.58 14.72 0
 -32 0 -6 102.07 14.98 0
 32 0 6 122.21 15.77 0
 -32 0 -6 123.91 15.15 0
 39 1 -6 119.05 15.18 0
 -39 -1 6 161.37 15.78 0
 -39 1 6 160.07 17.13 0
 -39 -1 6 143.47 15.05 0
 39 -1 -6 126.96 16.9 0
 39 -1 -6 131.56 15.29 0
 -39 1 6 144.65 16.04 0
 39 1 -6 122.01 15.86 0
 -37 -1 6 130.61 15.91 0
 37 -1 -6 97.3 15.66 0
 -37 1 6 109.98 11.05 0
 -37 1 6 131.72 16.1 0
 -37 -1 6 89.34 10.69 0
 37 -1 -6 100.91 15.17 0
 37 1 -6 92.69 11.5 0
 37 1 -6 104.72 15.45 0
 35 -1 -6 27.94 15.46 0
 -35 -1 6 18.11 11.37 0
 -35 1 6 46.91 15.6 0
 -35 -1 6 23.21 10.45 0
 35 -1 -6 23.61 15.52 0
 35 1 -6 21.45 10.93 0
 35 1 -6 10.98 15.29 0
 -35 1 6 10.76 10.64 0
 -33 -1 6 299.53 16.18 0
 -33 1 6 286.11 17.56 0
 33 1 -6 240.25 16.27 0
 -33 1 6 241.67 17.59 0
 -33 -1 6 258.95 16.94 0
 33 -1 -6 255.66 16.43 0
 33 1 -6 244.55 16.27 0
 33 -1 -6 254.17 17.6 0
 -31 -1 6 30.39 15.79 0
 -31 1 6 15.68 16.47 0
 -31 1 6 15.66 17.29 0
 31 1 -6 16.33 11.36 0
 31 -1 -6 15.78 16.57 0
 31 1 -6 33.92 15.38 0
 31 -1 -6 30.62 15.86 0
 -31 -1 6 21.67 16.04 0
 -29 1 6 94.75 17.43 0
 -29 -1 6 85.37 16.36 0
 -29 -1 6 84.18 16.31 0
 29 1 -6 87.96 15.87 0
 29 -1 -6 84.84 17.21 0
 29 -1 -6 77.51 12.42 0
 -29 1 6 81.58 17.24 0
 29 1 -6 93.81 16.13 0
 -27 -1 6 680.68 19.33 0
 -27 -1 6 640.33 19.53 0
 27 -1 -6 573.68 19.79 0
 27 -1 -6 616.62 20.46 0
 27 1 -6 607.25 19.63 0
 -27 1 6 699.29 21.36 0
 -27 1 6 636.18 20.79 0
 27 1 -6 629.81 19.27 0
 -25 1 6 38.57 17.62 0
 25 -1 -6 43.48 18.57 0
 -25 1 6 37.28 12.57 0
 -25 -1 6 37 12.64 0
 25 1 -6 38.96 17.53 0
 25 1 -6 38.87 12.32 0
 -25 -1 6 30.04 12.59 0
 25 -1 -6 34.29 12.94 0
 23 -1 -6 520.35 20.03 0
 -23 1 6 568.12 20.66 0
 23 -1 -6 568.7 19.99 0
 23 1 -6 565.82 21.05 0
 23 1 -6 504.82 20.74 0
 -23 -1 6 538.77 16.38 0
 -23 -1 6 585.68 16.89 0
 -23 1 6 596.51 20.98 0
 -21 1 6 8.96 16.84 0
 21 -1 -6 4.58 16.8 0
 -21 1 6 -1.2 17.16 0
 -21 -1 6 -5.86 18.61 0
 -21 -1 6 4.93 18.98 0
 21 1 -6 7.62 18.74 0
 21 1 -6 -7.07 18.26 0
 21 -1 -6 -0.79 16.27 0
 19 -1 -6 3.4 17.57 0
 -19 -1 6 13.82 19.31 0
 -19 1 6 9.46 19.58 0
 19 1 -6 3.82 13.31 0
 19 -1 -6 -4.34 17.95 0
 19 1 -6 5.75 19.52 0
 -19 -1 6 1.09 19.23 0
 -19 1 6 5.57 18.96 0
 17 1 -6 4147.3 36.44 0
 -17 -1 6 4224.6 36.36 0
 -17 1 6 4109.1 37.71 0
 17 -1 -6 4163.31 38.04 0
 -17 -1 6 4392.05 36.87 0
 -17 1 6 4561.77 39.2 0
 17 -1 -6 3982.85 37.45 0
 17 1 -6 4379.96 36.86 0
 -15 1 6 933.92 26.63 0
 15 -1 -6 922.81 27 0
 15 -1 -6 955.36 26.68 0
 -15 -1 6 943.92 27.27 0
 15 1 -6 1005.31 21.7 0
 15 1 -6 933.94 26.57 0
 -15 -1 6 1024.39 26.41 0
 -15 1 6 1006.72 27.12 0
 -13 -1 6 150.41 26.41 0
 13 1 -6 143.46 26.2 0
 -13 1 6 143.59 25.38 0
 13 -1 -6 144.78 26.22 0
 -13 -1 6 141.31 27.88 0
 13 1 -6 122.7 27.97 0
 13 -1 -6 147.63 25.21 0
 -11 -1 6 404.78 28.51 0
 11 1 -6 355.37 28.18 0
 11 -1 -6 374.58 26.92 0
 -11 1 6 384.67 27.64 0
 -11 1 6 379.96 27.56 0
 -11 -1 6 389.7 28.44 0
 11 1 -6 378.59 27.88 0
 11 -1 -6 377.15 27.66 0
 -9 1 6 1041.39 31.42 0
 9 -1 -6 995.3 31.07 0
 9 1 -6 984.06 30.93 0
 -9 -1 6 998.97 30.48 0
 9 -1 -6 961.42 31.53 0
 -9 -1 6 998.18 30.98 0
 9 1 -6 926.19 31.39 0
 -9 1 6 959.54 31.56 0
 -7 1 6 5784.71 53.45 0
 7 1 -6 5697.52 48.31 0
 7 1 -6 5559.73 48.3 0
 -7 1 6 5775.15 55.94 0
 7 -1 -6 5533.88 52.33 0
 -7 -1 6 5831.53 48.93 0
 7 -1 -6 5673.11 52.92 0
 -7 -1 6 5668.43 48.33 0
 5 1 -6 4643.08 45.41 0
 -5 -1 6 4591.02 45.3 0
 5 -1 -6 4366.26 48.08 0
 -5 1 6 4635.27 48.65 0
 5 -1 -6 4541.31 48.4 0
 -5 -1 6 4677.49 45.4 0
 -5 1 6 4810.89 50.61 0
 5 1 -6 4699.33 45.62 0
 3 1 -6 0.03 18.09 0
 -3 1 6 -9.15 25.94 0
 -3 1 6 -1.93 27.29 0
 3 1 -6 -2.98 26.4 0
 -3 -1 6 -6.1 25.55 0
 3 -1 -6 -0.15 26.32 0
 -3 -1 6 -13.53 25.61 0
 3 -1 -6 7.76 26.49 0
 1 -1 -6 953.34 32.26 0
 1 1 -6 947.25 30.07 0
 -1 1 6 912.23 32.35 0
 1 -1 -6 1016.19 32.92 0
 -1 -1 6 1034.18 31.13 0
 -1 -1 6 957.2 30.18 0
 1 1 -6 1038.54 31.08 0
 -1 1 6 943.42 26.52 0
 -1 -1 -6 2.87 27.93 0
 1 1 6 15.67 26.81 0
 1 -1 6 -6.16 25.7 0
 -1 1 -6 13.48 18.23 0
 -1 1 -6 2.56 26.68 0
 1 -1 6 18.35 27.21 0
 1 1 6 15.53 19.3 0
 -1 -1 -6 -0.62 27.1 0
 3 1 6 790.68 30.34 0
 3 1 6 849.55 32.44 0
 -3 1 -6 818.9 30.66 0
 3 -1 6 868.83 30.73 0
 3 -1 6 778.84 29.33 0
 -3 -1 -6 829.25 24.82 0
 -3 -1 -6 813.12 30.87 0
 -3 1 -6 795.77 29.34 0
 5 -1 6 1453.85 33.06 0
 -5 1 -6 1432.33 33.12 0
 5 -1 6 1346.1 32.39 0
 5 1 6 1432.96 34.13 0
 -5 -1 -6 1404.39 27.27 0
 -5 1 -6 1396.75 32.26 0
 -5 -1 -6 1365.42 34.05 0
 5 1 6 1309.07 27.21 0
 7 -1 6 61.53 27.03 0
 -7 1 -6 62.18 26.26 0
 -7 1 -6 54.84 25.76 0
 -7 -1 -6 58.67 27.97 0
 7 1 6 55.32 28.91 0
 7 1 6 51.07 26.94 0
 7 -1 6 65.3 27.24 0
 -7 -1 -6 61.92 27.39 0
 -9 -1 -6 378.87 18.7 0
 9 1 6 400.96 24.78 0
 9 -1 6 369.69 18.68 0
 9 1 6 442.97 26.71 0
 9 -1 6 426.8 25.56 0
 -9 -1 -6 424.64 26.14 0
 -9 1 -6 393.03 23.09 0
 -9 1 -6 458.7 25.24 0
 11 -1 6 374.46 22.28 0
 11 -1 6 393.77 22.64 0
 -11 -1 -6 425.24 22.41 0
 -11 -1 -6 387.15 22.38 0
 -11 1 -6 412.82 17.23 0
 11 1 6 408.31 17.44 0
 -11 1 -6 380.44 22.1 0
 11 1 6 392.28 21.96 0
 13 -1 6 173.24 20.03 0
 13 1 6 179.73 20.06 0
 13 -1 6 168.01 15.38 0
 -13 -1 -6 215.52 20.67 0
 -13 1 -6 178.04 15.09 0
 13 1 6 195.66 20.33 0
 -13 -1 -6 178.16 20.12 0
 -13 1 -6 162.06 15.15 0
 -15 1 -6 501.03 20.89 0
 15 1 6 578.52 21.43 0
 15 -1 6 499.6 20.33 0
 15 -1 6 526.62 16.58 0
 -15 1 -6 597.13 21.9 0
 -15 -1 -6 527.08 20.77 0
 15 1 6 511.07 20.77 0
 -15 -1 -6 623.82 21.7 0
 -17 -1 -6 217.81 14.58 0
 17 -1 6 239.97 19.13 0
 -17 1 -6 249.05 19.79 0
 17 1 6 207.38 14.1 0
 -17 -1 -6 257.56 19.94 0
 -17 1 -6 219.86 19.01 0
 17 1 6 217.18 19.5 0
 17 -1 6 219.1 18.95 0
 19 -1 6 74.9 17.64 0
 19 1 6 70.31 13.82 0
 -19 -1 -6 76.18 18.25 0
 -19 1 -6 65.82 17.97 0
 -19 1 -6 75.55 17.47 0
 -19 -1 -6 54.59 17.31 0
 19 -1 6 59.77 17.57 0
 19 1 6 68.37 18.15 0
 21 -1 6 28 16.09 0
 -21 1 -6 17.97 16.82 0
 21 1 6 6.16 11.64 0
 -21 -1 -6 4.21 16.98 0
 -21 1 -6 8.33 16.32 0
 21 1 6 -2.66 16.96 0
 21 -1 6 6.56 11.95 0
 -21 -1 -6 0.36 17.7 0
 -23 1 -6 174.82 16.54 0
 23 -1 6 183.83 16.89 0
 -23 -1 -6 180.69 16.57 0
 -23 -1 -6 197.06 18.35 0
 23 1 6 176.8 17.21 0
 23 1 6 150.6 13.27 0
 23 -1 6 172.29 17.11 0
 -23 1 -6 187.63 12.92 0
 -25 -1 -6 22.65 15.78 0
 25 -1 6 16.81 15.32 0
 -25 1 -6 31.54 16.02 0
 25 1 6 25.3 16.08 0
 25 -1 6 23.64 15.7 0
 -25 -1 -6 16.05 16.63 0
 -25 1 -6 39.91 15.61 0
 25 1 6 23.61 15.98 0
 27 1 6 179.6 16.17 0
 -27 1 -6 209.58 16.82 0
 -27 1 -6 162.08 16.28 0
 27 -1 6 155.02 16.46 0
 -27 -1 -6 194.6 16.83 0
 -27 -1 -6 178.17 15.33 0
 27 -1 6 199.51 15.64 0
 27 1 6 170.11 15.95 0
 -29 -1 -6 23.27 14.69 0
 29 1 6 9.74 15.08 0
 29 -1 6 13.86 14.81 0
 29 -1 6 19.04 14.74 0
 -29 -1 -6 11.15 11.04 0
 29 1 6 14.13 15.22 0
 -29 1 -6 9.62 13.83 0
 -29 1 -6 23.05 13.95 0
 -31 1 -6 5.72 15.06 0
 31 -1 6 18.31 14.97 0
 -31 1 -6 13.13 14.3 0
 31 1 6 8.19 14.11 0
 -31 -1 -6 4.44 14.82 0
 -31 -1 -6 16.92 14.2 0
 31 1 6 5.13 14.25 0
 31 -1 6 6.97 13.7 0
 -33 -1 -6 66.59 15.17 0
 -33 -1 -6 57.82 13.76 0
 -33 1 -6 60.54 14.59 0
 -33 1 -6 62.63 15.21 0
 33 1 6 84.01 14.42 0
 33 -1 6 53.06 14.77 0
 33 1 6 47.52 15.03 0
 33 -1 6 65.15 14.56 0
 38 2 -6 -10.89 13.99 0
 -38 -2 6 -6.28 14.74 0
 -38 2 6 6.95 15.92 0
 38 2 -6 5.25 15.02 0
 -38 -2 6 13.46 14.33 0
 38 -2 -6 20.01 14.65 0
 -38 2 6 12.07 13.75 0
 38 -2 -6 11.43 14.57 0
 -36 2 6 67.3 16.1 0
 -36 -2 6 84.9 11.55 0
 -36 2 6 73.77 16.19 0
 36 -2 -6 86.25 15.42 0
 36 2 -6 73.78 15.76 0
 -36 -2 6 72.16 15.64 0
 36 2 -6 84.68 15.4 0
 36 -2 -6 81.49 15.71 0
 -34 -2 6 6.26 15.66 0
 34 -2 -6 12.36 16.72 0
 -34 -2 6 15.66 15.19 0
 34 2 -6 18.02 11.07 0
 -34 2 6 28.04 15 0
 -34 2 6 28.29 16.64 0
 34 -2 -6 13.73 15.44 0
 34 2 -6 21.41 14.08 0
 -32 -2 6 24.28 15.19 0
 -32 2 6 2.01 14.81 0
 -32 -2 6 3.97 11.12 0
 32 2 -6 24.49 14.24 0
 32 -2 -6 23.51 19.03 0
 -32 2 6 4.68 15.83 0
 32 2 -6 -8.16 14.82 0
 32 -2 -6 20.7 16.28 0
 -30 -2 6 -0.54 16.66 0
 -30 2 6 -1.13 17.15 0
 30 2 -6 -3.92 16.78 0
 -30 -2 6 16.88 16.26 0
 -30 2 6 -9.05 16.48 0
 30 2 -6 1.68 15.75 0
 30 -2 -6 13.02 15.46 0
 30 -2 -6 0.26 16.59 0
 -28 -2 6 183.91 17.9 0
 -28 2 6 157.45 18 0
 -28 2 6 163.68 18.27 0
 28 -2 -6 139.88 17.58 0
 -28 -2 6 155.4 17.58 0
 28 -2 -6 145.44 17.58 0
 28 2 -6 150.06 12.38 0
 28 2 -6 148.91 16.7 0
 26 2 -6 193.83 17.92 0
 26 -2 -6 207.31 18.61 0
 26 2 -6 189.78 17.38 0
 -26 2 6 226.61 19.51 0
 -26 2 6 196.76 19.24 0
 26 -2 -6 166.54 18.57 0
 -26 -2 6 183.13 13.4 0
 -26 -2 6 222.17 17.87 0
 24 -2 -6 468.38 20.48 0
 -24 2 6 466.81 20.38 0
 -24 -2 6 478.65 19.99 0
 -24 2 6 499.01 21.16 0
 24 2 -6 472.56 19.62 0
 24 2 -6 425.54 19.39 0
 24 -2 -6 419.36 20.01 0
 -24 -2 6 481.46 15.5 0
 22 -2 -6 810.68 22.05 0
 -22 2 6 907.51 22.89 0
 22 -2 -6 763.31 21.55 0
 -22 -2 6 839.14 18.32 0
 -22 2 6 814.62 22.05 0
 -22 -2 6 834.49 22.07 0
 22 2 -6 785.88 21.49 0
 22 2 -6 852.18 22.63 0
 20 -2 -6 11.64 17.97 0
 -20 2 6 17.45 21.7 0
 20 2 -6 7.31 17.85 0
 20 2 -6 3.34 18.36 0
 -20 -2 6 7.38 18.45 0
 20 -2 -6 20.53 22.04 0
 -20 -2 6 12.41 18.7 0
 -20 2 6 28.8 19.27 0
 18 2 -6 102.36 19.26 0
 -18 -2 6 85.21 19.45 0
 -18 2 6 90.49 19.51 0
 18 -2 -6 92.23 19.58 0
 18 -2 -6 87.83 19.09 0
 18 2 -6 98.92 14.59 0
 -18 -2 6 107.26 19.23 0
 -18 2 6 94.89 24.87 0
 16 -2 -6 71.18 21.08 0
 -16 2 6 77.94 25.63 0
 16 2 -6 76.45 20.71 0
 16 -2 -6 77.42 25.71 0
 16 2 -6 83.4 21.37 0
 -16 2 6 81.49 20.85 0
 -16 -2 6 80.19 21.03 0
 -16 -2 6 73.07 21.39 0
 -14 -2 6 537.59 25.62 0
 -14 2 6 619.51 26.57 0
 14 -2 -6 583.64 26.28 0
 14 2 -6 572.23 25.85 0
 14 -2 -6 540.2 25.57 0
 -14 -2 6 607.08 25.57 0
 14 2 -6 561.89 25.57 0
 -12 -2 6 179.4 27.19 0
 -12 2 6 185.46 30.4 0
 12 2 -6 175.35 27.44 0
 12 -2 -6 167.17 24.6 0
 12 2 -6 201.04 27.2 0
 12 -2 -6 183.78 26.15 0
 -12 2 6 176.94 25.53 0
 10 -2 -6 251.14 31.61 0
 10 -2 -6 243.65 24.26 0
 10 2 -6 255.4 28.38 0
 10 2 -6 235.99 28 0
 -10 2 6 227.43 26.06 0
 -10 2 6 267.42 31.66 0
 -10 -2 6 243.44 20.05 0
 -10 -2 6 246.51 27.46 0
 8 2 -6 59.53 26.08 0
 -8 2 6 60.43 23.83 0
 -8 -2 6 54.4 25.71 0
 8 -2 -6 56.8 27.87 0
 8 2 -6 54.73 17.58 0
 -8 -2 6 60.28 18.72 0
 8 -2 -6 62.04 23.49 0
 -8 2 6 59.15 28.06 0
 -6 2 6 88.55 24.27 0
 6 -2 -6 95.21 28.49 0
 6 2 -6 99.86 25.01 0
 -6 2 6 90.58 28.58 0
 -6 -2 6 87.75 25.23 0
 -6 -2 6 95.57 25.76 0
 6 -2 -6 100.87 29.56 0
 6 2 -6 95.5 25.73 0
 4 -2 -6 4280.89 52 0
 -4 -2 6 4514.21 44.01 0
 4 2 -6 4669.72 44.66 0
 -4 2 6 4450.27 49.88 0
 4 2 -6 4465.45 43.86 0
 -4 -2 6 4389.23 44.2 0
 4 -2 -6 4476.95 49.87 0
 -4 2 6 4644.4 52.67 0
 2 -2 -6 226.04 32.86 0
 -2 2 6 211.73 26.48 0
 2 2 -6 223.21 26.3 0
 -2 -2 6 251.45 27.4 0
 2 -2 -6 230.18 27.26 0
 -2 -2 6 211.24 25.82 0
 2 2 -6 220.03 26.43 0
 -2 2 6 248.17 27.58 0
 0 2 6 1751.15 35.48 0
 0 2 -6 1793.03 33.99 0
 0 -2 6 1760.88 33.89 0
 0 -2 6 2009 35.14 0
 0 -2 -6 1880.69 36.52 0
 0 2 6 1965.72 38.12 0
 0 2 -6 1853.71 29.49 0
 0 -2 -6 1759.33 36.28 0
 -2 2 -6 222.18 26.06 0
 2 -2 6 210.82 25.09 0
 -2 2 -6 211.14 19.1 0
 2 2 6 223.69 27.93 0
 -2 -2 -6 226.44 27.03 0
 2 2 6 207.89 26.14 0
 -2 -2 -6 197.53 26.7 0
 2 -2 6 227.12 26.31 0
 4 -2 6 676.64 28.96 0
 -4 -2 -6 670.64 30.15 0
 -4 2 -6 748.11 29.11 0
 -4 2 -6 713.48 28.9 0
 4 2 6 750.07 31.79 0
 -4 -2 -6 706.61 24.08 0
 4 -2 6 721.79 30.26 0
 4 2 6 680.33 29.17 0
 -6 -2 -6 327.02 26.83 0
 6 -2 6 330.5 25.55 0
 -6 2 -6 358.79 26.4 0
 6 2 6 337.65 20.43 0
 -6 -2 -6 334.2 20.09 0
 6 -2 6 329.5 25.6 0
 6 2 6 332.14 26.48 0
 -6 2 -6 329.95 18.46 0
 8 -2 6 1019.71 21.84 0
 8 -2 6 1174.99 27.61 0
 8 2 6 1161.58 27.92 0
 8 2 6 1044.16 27.01 0
 -8 -2 -6 1113.69 27.83 0
 -8 2 -6 1118.1 26.47 0
 -8 -2 -6 1179.64 28.54 0
 -8 2 -6 1131.8 27.62 0
 10 2 6 775.88 24.93 0
 -10 -2 -6 741.7 19.51 0
 10 -2 6 723.19 24.56 0
 -10 2 -6 722.73 24.06 0
 -10 -2 -6 663.78 18.79 0
 -10 2 -6 724.25 23.49 0
 10 -2 6 690.28 24.15 0
 10 2 6 674.13 23.83 0
 12 -2 6 25.46 19.14 0
 12 2 6 40.85 20.73 0
 12 -2 6 35.78 19.27 0
 -12 -2 -6 40.07 14.32 0
 -12 2 -6 23.6 19.89 0
 -12 -2 -6 43.02 20.15 0
 -12 2 -6 32.96 18.58 0
 12 2 6 41.29 14.3 0
 14 2 6 58.96 19.17 0
 14 -2 6 84.77 16.6 0
 14 -2 6 87.88 17.8 0
 -14 -2 -6 82.35 13.51 0
 -14 2 -6 90.27 14.17 0
 -14 -2 -6 59.38 18.41 0
 -14 2 -6 71.12 16.38 0
 14 2 6 62.96 19.55 0
 16 2 6 564.95 20.62 0
 16 -2 6 614.9 20.45 0
 -16 2 -6 561.34 19.24 0
 16 2 6 600.85 21.4 0
 -16 -2 -6 576.98 20.88 0
 -16 -2 -6 653.91 22.13 0
 -16 2 -6 626.68 20.98 0
 16 -2 6 538.58 20.22 0
 18 2 6 713.96 21.42 0
 -18 -2 -6 784.92 21.42 0
 18 -2 6 695.87 21.54 0
 -18 2 -6 660.3 21.06 0
 -18 2 -6 723.7 22.17 0
 -18 -2 -6 663.25 20.95 0
 18 2 6 662.58 21.9 0
 18 -2 6 647.71 21.21 0
 -20 -2 -6 16.8 17.6 0
 -20 -2 -6 11.54 12.03 0
 -20 2 -6 22.77 18.86 0
 20 -2 6 19.86 17.11 0
 -20 2 -6 13.56 17.44 0
 20 -2 6 9.43 17.1 0
 20 2 6 7.45 17.44 0
 20 2 6 16.11 16.75 0
 22 -2 6 28.52 17.3 0
 -22 -2 -6 45.35 13.14 0
 22 -2 6 35.94 16.11 0
 -22 2 -6 29.05 17.58 0
 22 2 6 38.03 16.53 0
 -22 2 -6 29.45 16.31 0
 -22 -2 -6 41.46 16.74 0
 22 2 6 24.72 16.67 0
 24 -2 6 619.37 19.01 0
 24 2 6 574.96 19.02 0
 -24 2 -6 590.11 19.02 0
 -24 -2 -6 640.92 19.44 0
 -24 -2 -6 565.85 18.74 0
 -24 2 -6 675.18 19.91 0
 24 2 6 651.14 19.15 0
 24 -2 6 538.09 18.89 0
 26 2 6 36.1 16.17 0
 -26 2 -6 66.17 16.77 0
 26 -2 6 11.6 16.22 0
 26 2 6 60.32 16.17 0
 -26 -2 -6 29.59 15.09 0
 -26 2 -6 40.31 16.09 0
 26 -2 6 46.91 16.66 0
 -26 -2 -6 50.88 15.7 0
 -28 -2 -6 173.24 16.87 0
 -28 -2 -6 146.7 15.45 0
 -28 2 -6 173.41 16.07 0
 -28 2 -6 167.96 12.54 0
 28 2 6 163.17 12.01 0
 28 2 6 169.22 15.78 0
 28 -2 6 149.63 15.97 0
 28 -2 6 160.88 16.84 0
 30 -2 6 108.18 15.83 0
 -30 -2 -6 115 14.7 0
 -30 2 -6 116.07 15.26 0
 -30 2 -6 146.9 16.12 0
 30 2 6 119.23 14.77 0
 30 2 6 89.46 15.33 0
 30 -2 6 138.88 15.44 0
 -30 -2 -6 140.88 15.55 0
 32 -2 6 6.87 14.27 0
 -32 2 -6 12.1 13.85 0
 -32 -2 -6 -0.9 14.19 0
 -32 -2 -6 27 14.69 0
 32 2 6 -8.48 10.41 0
 -32 2 -6 4.11 14.73 0
 32 2 6 12.98 14.54 0
 32 -2 6 17.54 14.65 0
 -37 -3 6 110.33 14.96 0
 -37 3 6 89.74 15.71 0
 -37 3 6 109.41 17.2 0
 -37 -3 6 65.36 14.86 0
 37 3 -6 64.99 10.95 0
 37 -3 -6 88.57 15.95 0
 37 -3 -6 68.94 15.82 0
 37 3 -6 77.79 14.43 0
 -35 3 6 45.5 16.16 0
 -35 -3 6 48.64 11.13 0
 35 3 -6 23.2 14.75 0
 -35 -3 6 38.38 15.13 0
 35 3 -6 41.35 14.89 0
 35 -3 -6 27.59 16 0
 -35 3 6 41.48 15.87 0
 35 -3 -6 41.33 19.08 0
 -33 3 6 10.81 16.4 0
 -33 -3 6 17.63 15.53 0
 -33 -3 6 2.18 15.63 0
 33 -3 -6 5.89 15.47 0
 33 3 -6 24.81 15.44 0
 33 -3 -6 6.95 15.3 0
 -33 3 6 -9.87 15.01 0
 33 3 -6 -3.32 11 0
 -31 -3 6 467.47 17.6 0
 -31 -3 6 388.11 17.18 0
 -31 3 6 469.05 18.84 0
 -31 3 6 379.67 17.73 0
 31 -3 -6 404.08 17.17 0
 31 3 -6 410.32 16.79 0
 31 3 -6 384.4 17.12 0
 31 -3 -6 347.59 18.17 0
 -29 -3 6 253.28 18.47 0
 -29 3 6 259.12 18.33 0
 -29 3 6 217.44 16.9 0
 -29 -3 6 230.08 17.44 0
 29 -3 -6 233.7 17.39 0
 29 3 -6 215.07 12.84 0
 29 3 -6 199.73 17.59 0
 29 -3 -6 212.71 21.17 0
 -27 -3 6 813.1 20.5 0
 -27 3 6 910.11 22.42 0
 27 -3 -6 757.66 21.14 0
 -27 3 6 824.56 23.94 0
 27 3 -6 853.51 20.15 0
 27 3 -6 772.61 15.94 0
 27 -3 -6 786.34 21.08 0
 -27 -3 6 908.75 20.97 0
 -25 3 6 43.27 17.59 0
 -25 3 6 26.05 16.99 0
 -25 -3 6 20.22 11.95 0
 25 3 -6 34.62 16.82 0
 -25 -3 6 18.77 17.67 0
 25 -3 -6 13.78 20.48 0
 25 -3 -6 32.12 21 0
 25 3 -6 20.02 16.83 0
 23 -3 -6 41.28 18.17 0
 -23 -3 6 48.43 13.46 0
 -23 3 6 33.88 19.78 0
 23 3 -6 43.7 17.76 0
 23 3 -6 37.04 17.86 0
 23 -3 -6 35.24 18.71 0
 -23 3 6 36.61 18.19 0
 -23 -3 6 46.23 12.37 0
 -21 3 6 13.61 18.78 0
 -21 -3 6 21.73 18.55 0
 -21 3 6 17.9 22.21 0
 21 -3 -6 13.63 21.86 0
 21 3 -6 2.97 18.02 0
 21 3 -6 29.25 18.12 0
 -21 -3 6 17.92 13.6 0
 21 -3 -6 5.81 18.11 0
 -19 -3 6 53.55 18.59 0
 19 3 -6 40.13 18.63 0
 -19 3 6 49.12 19.85 0
 19 -3 -6 39.21 23.26 0
 19 3 -6 49.99 18.06 0
 19 -3 -6 38.33 18.67 0
 -19 3 6 44.47 23.18 0
 -19 -3 6 41.66 18.79 0
 17 3 -6 854.04 22.79 0
 -17 3 6 981.32 27.82 0
 -17 -3 6 997.84 23.11 0
 -17 3 6 863.49 26.48 0
 17 -3 -6 857.15 25.68 0
 17 -3 -6 791.07 26.1 0
 17 3 -6 944.9 23.47 0
 -17 -3 6 924.36 22.86 0
 15 3 -6 396.5 21.35 0
 15 3 -6 317.58 21.35 0
 -15 -3 6 400.64 20.6 0
 -15 3 6 373.53 23.28 0
 15 -3 -6 355.79 23.39 0
 -15 -3 6 376.83 21.35 0
 15 -3 -6 321.41 23.63 0
 -15 3 6 391.8 24.46 0
 13 -3 -6 140.37 29.18 0
 13 3 -6 127.81 22.88 0
 -13 -3 6 153.31 22.6 0
 13 -3 -6 153.84 27.81 0
 13 3 -6 130.72 22.75 0
 -13 3 6 163.43 29.32 0
 -13 -3 6 146.97 16.26 0
 -13 3 6 149.82 27.93 0
 -11 -3 6 42.88 24.5 0
 -11 -3 6 68.36 24.17 0
 11 3 -6 61.8 23.98 0
 -11 3 6 64.65 29.56 0
 11 3 -6 65.69 24.02 0
 -11 3 6 70.23 28.62 0
 11 -3 -6 55.81 30.16 0
 11 -3 -6 60.53 23.11 0
 -9 -3 6 41.07 18.88 0
 -9 -3 6 35.07 25.66 0
 -9 3 6 39.74 29.55 0
 9 3 -6 36.93 18.63 0
 -9 3 6 44.41 29.08 0
 9 -3 -6 44.3 29.66 0
 9 3 -6 54.14 25.46 0
 9 -3 -6 42.86 28.18 0
 7 -3 -6 1270.72 38.82 0
 -7 -3 6 1368.45 31.5 0
 7 3 -6 1330.47 25.58 0
 -7 3 6 1399.4 38.94 0
 7 3 -6 1327.9 31.44 0
 -7 -3 6 1345.69 25.83 0
 -7 3 6 1341.51 40.22 0
 7 -3 -6 1328.36 39.06 0
 5 -3 -6 976.65 32.58 0
 -5 3 6 1001.64 34.3 0
 -5 3 6 990.25 37.36 0
 5 3 -6 1012.79 23.87 0
 -5 -3 6 1009.43 29.05 0
 -5 -3 6 1072.52 30.27 0
 5 3 -6 1038.83 30.01 0
 5 -3 -6 999.71 35.7 0
 -3 3 6 19.55 22.86 0
 3 3 -6 14.02 24.23 0
 3 3 -6 15.89 24.58 0
 3 -3 -6 27.69 24.8 0
 -3 -3 6 23.91 24.41 0
 -3 3 6 12.03 31.08 0
 -3 -3 6 24.39 24.16 0
 3 -3 -6 23.35 24.11 0
 1 3 -6 550.21 27.31 0
[truncated: 756,292 more chars]
